# Supplementary material
Source: PubMed Central journal article supplement (PMC6263163)
Supplement: NIHMS996053-supplement-SI-1.pdf [file NIHMS996053-supplement-SI-1.pdf]

1 **SUPPORTING INFORMATION**

2  
3 **Non-targeted screening of halogenated organic compounds in bottlenose**  
4 **dolphins (*Tursiops truncatus*) from Rio de Janeiro, Brazil.**

5  
6 Mariana B. Alonso<sup>†,‡,§,⊥</sup>, Keith A. Maruya<sup>‡</sup>, Nathan G. Dodder<sup>†,||</sup>, José Lailson-Brito Jr. <sup>§</sup>,  
7 Alexandre Azevedo<sup>§</sup>, Elitieri Santos-Neto<sup>§</sup>, Joao P. M. Torres<sup>⊥</sup>, Olaf Malm<sup>⊥</sup>, Eunha Hoh<sup>\*†</sup>

8  
9 <sup>†</sup>Graduate School of Public Health, San Diego State University, 5500 Campanile Drive, San  
10 Diego, CA 92182, USA

11 <sup>‡</sup>Southern California Coastal Water Research Project Authority, 3535 Harbor Boulevard, Suite  
12 110, Costa Mesa, CA 92626, USA

13 <sup>§</sup> Laboratory of Aquatic Mammals and Bioindicators (UERJ), R. São Francisco Xavier, 524 -  
14 S.4018 - Bl. E, Rio de Janeiro, RJ, Brasil, 20550-013

15 <sup>⊥</sup> Laboratory of Radioisotopes - Biophysics Institute (UFRJ), Av. Carlos Chagas Filho, 373 CCS  
16 - Bl. G, Rio de Janeiro, RJ, Brasil, 21941-902

17 <sup>||</sup>San Diego State University Research Foundation, 5250 Campanile Drive, San Diego, CA  
18 92182, USA

19  
20 **\*Corresponding author:**

21 Phone: +16195944671; fax: +16195946112; e-mail: ehoh@mail.sdsu.edu

23 **Supporting Information Summary**

24 Glossary of acronyms and four supplemental figures are included in SI. A separate supporting  
25 information, a mass spectral library report for the 158 halogenated organic compounds is  
26 provided in PDF format. These materials are available free of charge via the Internet at  
27 <http://pubs.acs.org/>.

28

29 **Glossary of Acronyms**

- 30 B/CDE: brominated chlorinated diphenyl ether
- 31 BDE: brominated diphenyl ether
- 32 BDE-77: 3,3',4,4'-tetrabromodiphenyl ether
- 33 BDE-166: 2,3,4,4',5,6-hexabromodiphenyl ether -
- 34 octa-BDE: octabrominated diphenyl ether
- 35 penta-BDE: pentabrominated diphenyl ether
- 36 Bromophenol-M: bromophenol mixed source
- 37 Bromophenol-U: bromophenol unknown source
- 38 Chlorophenol-M: chlorophenol mixed source
- 39 Chlorophenol-U: chlorophenol unknown source
- 40 *o,p'*-DDD: *o,p'*-dichlorodiphenyldichloroethane
- 41 *p,p'*-DDD: *p,p'*-dichlorodiphenyldichloroethane
- 42 *p-p'*-DDE: *p-p'*-dichlorobis(chlorophenyl)ethene
- 43 DDT: dichlorodiphenyltrichloroethane
- 44 Dec 602: dechlorane 602
- 45 Dec 603: dechlorane 603
- 46 di-MeO-PBB-80: 2,2'-dimethoxy-3,3',5,5'-tetrabromobiphenyl
- 47 di-MeOBB-Br3Cl: dimethoxy tribromo chloro biphenyl
- 48 2MeO-Biphenyl-N: dimethoxy biphenyl natural source
- 49 2MeO-Biphenyl-U: dimethoxy biphenyl unknown source
- 50 1D: first-dimension column
- 51 2D: second dimension column
- 52 DMBP: 1,1'-dimethyl-2,2'-bipyrrroles
- 53 EI: electron ionization

- 54 eV: electron volts
- 55 4-FBDE-69: 4-fluoro-2,3',4,6-tetrabromodiphenyl ether
- 56 6-FBDE-47: 6-fluoro-2,2',4,4'-tetrabromodiphenyl ether
- 57 GC×GC: comprehensive two-dimensional gas chromatography
- 58 GPC: gel permeation chromatography
- 59 HCB: hexachlorobenzene
- 60  $\alpha$ -HCH:  $\alpha$ -hexachlorocyclohexane
- 61  $\beta$ -HCH:  $\beta$ - hexachlorocyclohexane
- 62  $\gamma$ -HCH:  $\gamma$ - hexachlorocyclohexane
- 63 HOC: halogenated organic compound
- 64 MBP: 1'-methyl-1,2'-bipyrrole
- 65 MeO-B/CDE: methoxy brominated chlorinated diphenyl ether
- 66 MeO-BDE: methoxy brominated diphenyl ether
- 67 MeO-CDE: methoxy chlorinated diphenyl ether
- 68 MS: mass spectra
- 69 MeSO<sub>2</sub>-PCB: methyl sulfonyl polychlorinated biphenyl
- 70 m/z: mass-to-charge ratio
- 71 Na<sub>2</sub>SO<sub>4</sub>: sodium sulfate
- 72 NE Pacific: North Eastern Pacific Ocean
- 73 NIST: National Institute of Standards and Technology
- 74 NTA: non-targeted analysis
- 75 NW Atlantic: North Western Atlantic Ocean
- 76 OH-PCB: hydroxy polychlorinated biphenyl
- 77 PBB: polybrominated biphenyl
- 78 PBDE: polybrominated diphenyl ether

79 PBHD: polybrominated hexahydroxanthene derivative  
80 PCA: principal component analysis  
81 PCB: polychlorinated biphenyl  
82 PCDE: polychlorinated diphenyl ether  
83 PCS: polychlorinated styrene  
84 PCT: polychlorinated terphenyl  
85 PDF: portable document format  
86 PFAS: perfluoroalkyl substances  
87 POP: persistent organic pollutant  
88 RT: retention time  
89 SI: supporting information  
90 S/N: signal-to-noise ratio  
91 SpecLibDolphin2014: Southern California Dolphin Blubber Contaminant Library  
92 SpecLibDolphin2011: Massachusetts Dolphin Blubber Contaminant Library  
93 SpecLibBrazilDolphin2016: Rio de Janeiro Dolphin Blubber Contaminant Library  
94 SW Atlantic: South Western Atlantic Ocean  
95 TCPM: tris(chlorophenyl)methane  
96 TCPMOH: tris(chlorophenyl)methanol  
97 TOF-MS: time-of-flight mass spectrometry  
98 T. truncatus: *Tursiops truncatus*  
99  
100  
101  
102

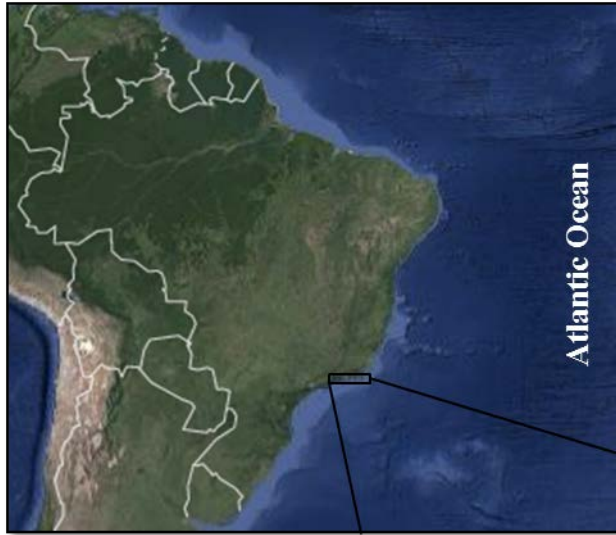

103

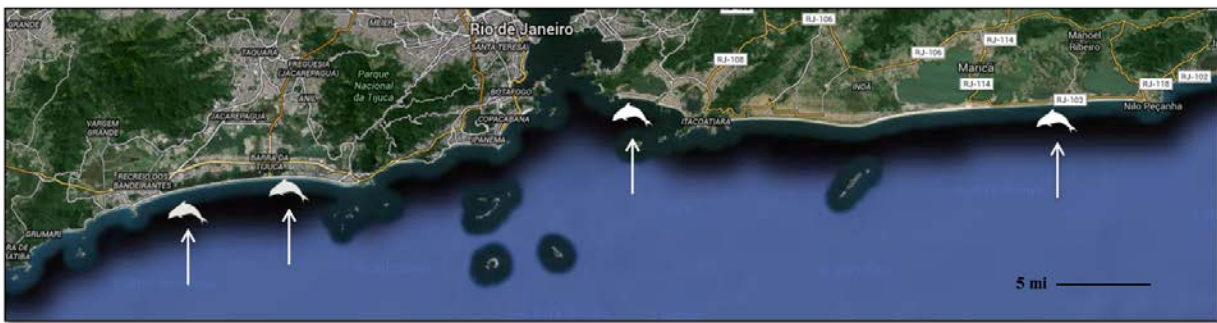

104

105 **Figure S1.** Map of Brazil and the sampling areas in the Rio de Janeiro coastal area (dolphin silhouettes  
106 with arrows), South Western Atlantic Ocean. Map data: Imagery©2015TerraMetrics, Map data ©2015  
107 Google

108

109

110

111

112

113

114

115

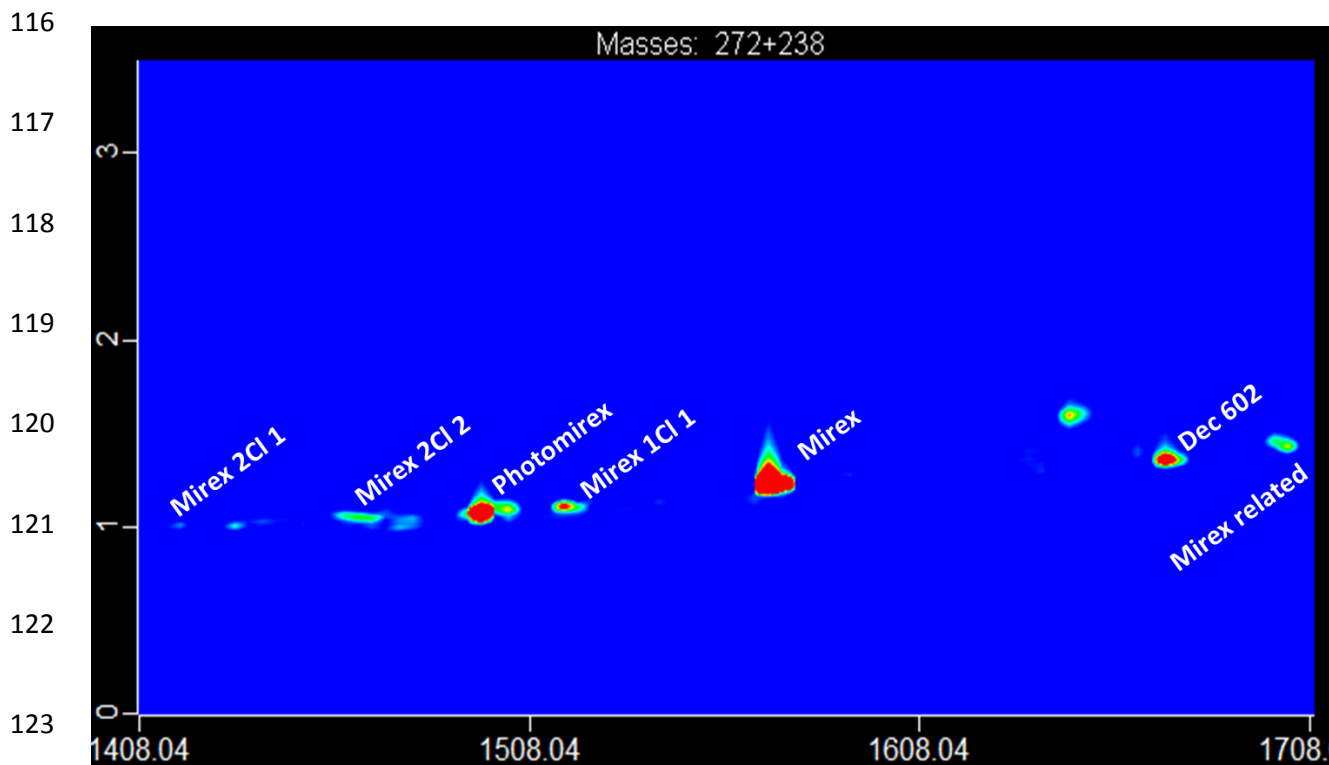

124 **Figure S2.** GC×GC/TOF-MS contour map of m/z 272 and 238 from mirex/dechlorane related compounds  
 125 detected in adult male bottlenose dolphins (*T. truncatus*) from Rio de Janeiro, Brazil. The x-axis is the 1<sup>st</sup>  
 126 GC retention time (s) and the y-axis the 2<sup>nd</sup> GC retention time (s). Software: *ChromaTOF*.

127

128

129

130

131

132

133

134

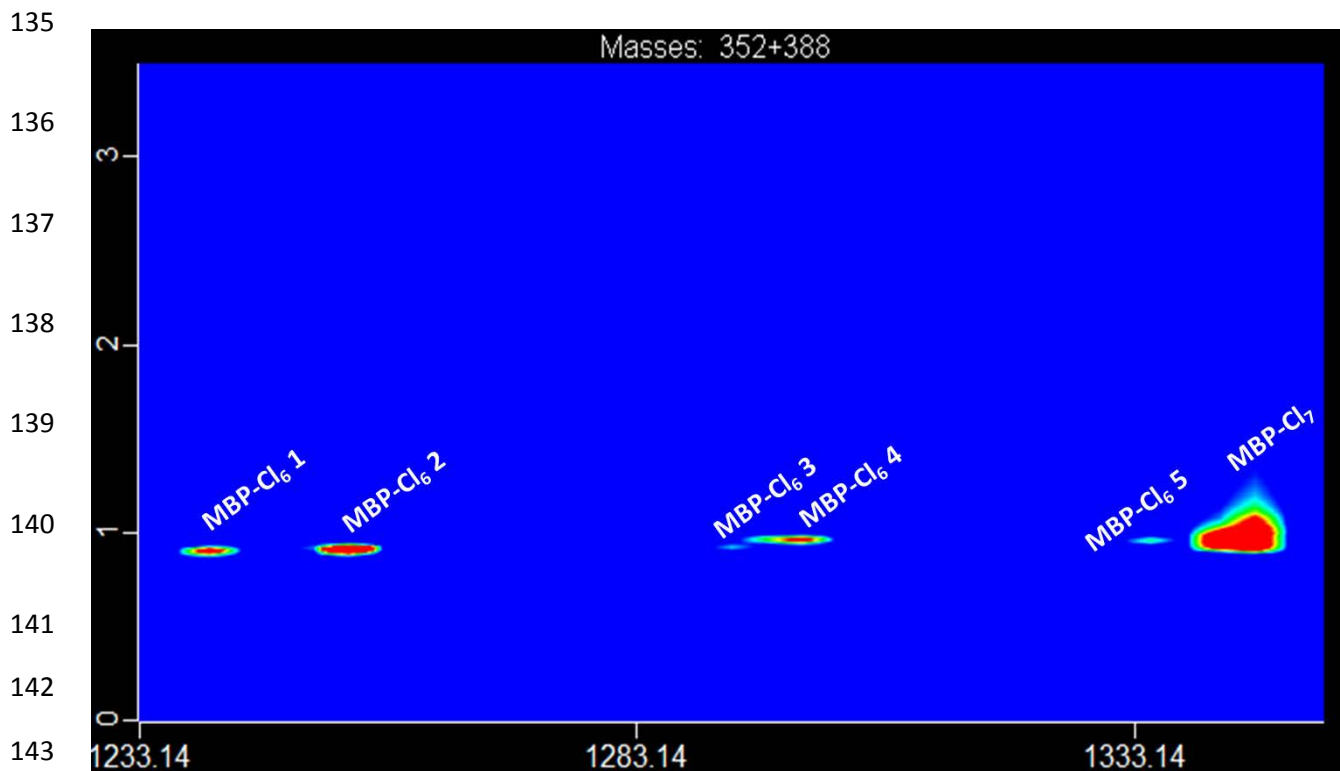

145 **Figure S3.** GC×GC/TOF-MS contour map of m/z 352 and 388 from chlorinated methyl bipyroles  
 146 (MBPs) detected in adult male bottlenose dolphins (*T. truncatus*) from Rio de Janeiro, Brazil. The x-axis  
 147 is the 1st GC retention time (s) and the y-axis is the 2nd GC retention time (s). Software: ChromaTOF.

148

149

150



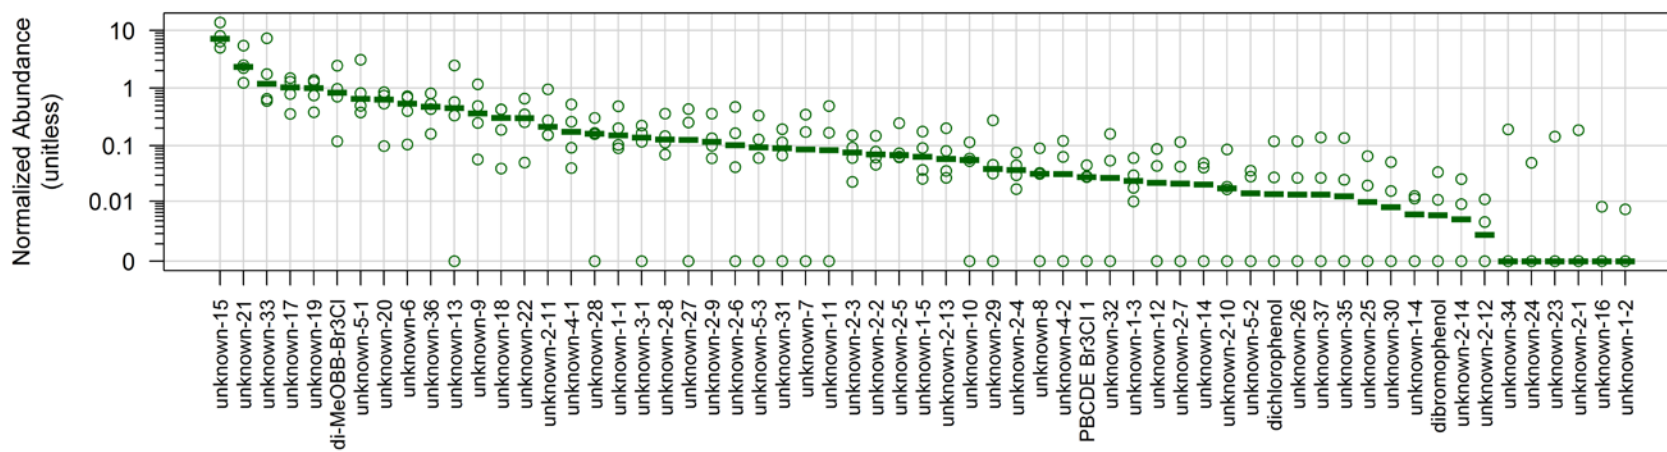

153 **Figure S4.** Relative abundance of HOCs at unknown origin detected in the blubber of adult male bottlenose dolphins (*T. truncatus*)  
 154 from the Rio de Janeiro coast, Brazil. The acronyms are listed in the SI.
