# Supplementary material
Source: PubMed Central journal article supplement (PMC6263163)
Supplement: NIHMS996053-supplement-SI-2.pdf [file NIHMS996053-supplement-SI-2.pdf]

## Brazilian Bottlenose Dolphin Blubber

Non-targeted screening of halogenated organic compounds in  
bottlenose dolphins (*Tursiops truncatus*) from Rio de Janeiro, Brazil.

Authors: Mariana B. Alonso, Keith A. Maruya, Nathan G. Dodder, José Lailson-Brito Jr.,  
Alexandre Azevedo, Elitieri Santos-Neto, Joao P. M. Torres, Olaf Malm, Eunha Hoh

Web Reference: <http://OrgMassSpec.github.io>

Chemicals previously identified in other regions are specified as follows:

- 1) In N. Atlantic: indicates if the compound was found in dolphin blubber from the North Atlantic (Hoh et al., *Environ. Sci. Technol.*, 2012, 46, 8001–8008.
- 2) In N. Pacific: indicates if the compound was found in dolphin blubber from the Southern California Bight (Shaul et al., *Environ. Sci. Technol.*, 2015, 49, 1328–1338.

Prepared: 2016–12–30 16:33:08  
SpecLibDolphin2016 version 0.2  
OrgMassSpecR version 0.4–8  
png version 0.1–7  
R version 3.3.1 (2016–06–21)

Name: oxychlordane

Class: Chlordane-related

Matrix: South Atlantic Dolphin Blubber  
In N. Atlantic: TRUE, In N. Pacific: TRUE  
Typically Monitored: TRUE  
Comment:

Instrument: GCxGC-TOF, EI, 70 eV  
1D RT, 2D RT (s): 1303.1, 0.944  
Quantitative Ion m/z: 389

Elemental Formula: C<sub>10</sub>H<sub>4</sub>Cl<sub>8</sub>O  
Source: anthropogenic  
Identification: Reference Database MS

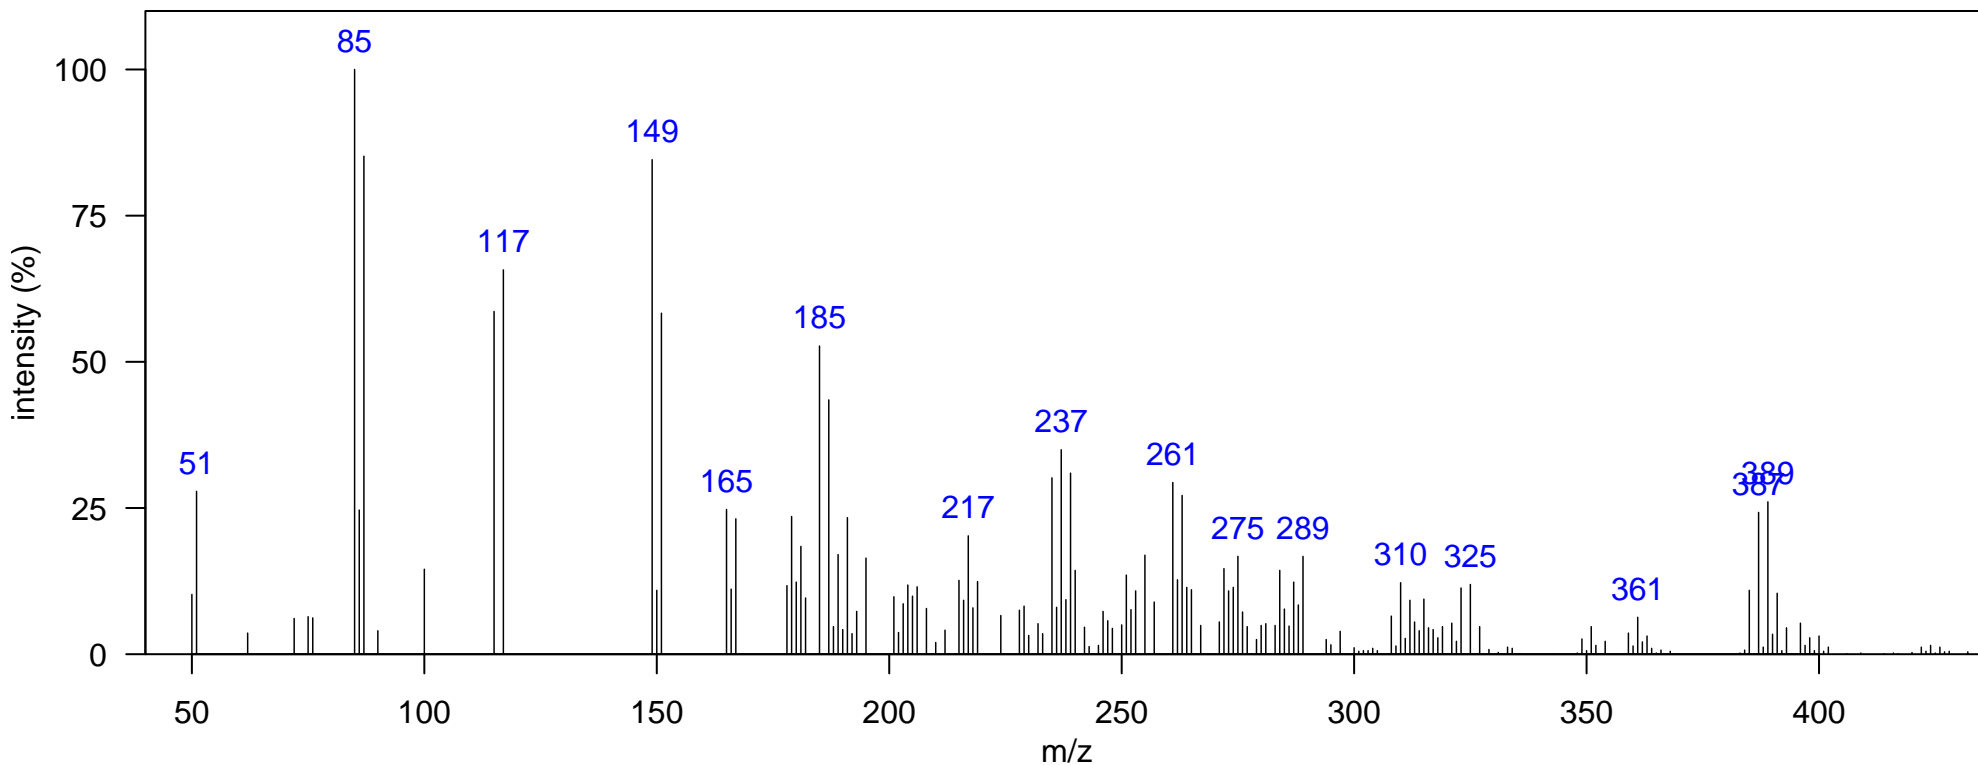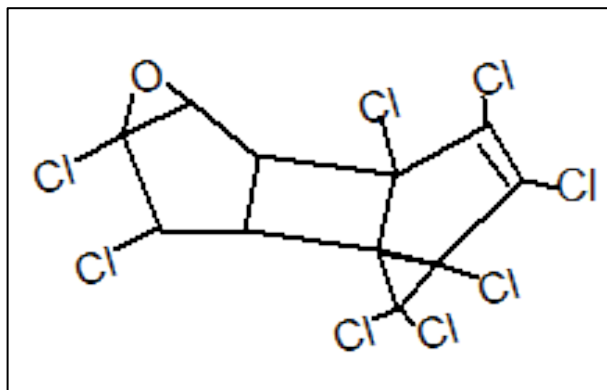

| m/z [Fragment]                                                    |
|-------------------------------------------------------------------|
| 235 [C <sub>5</sub> Cl <sub>5</sub> ] <sup>+</sup>                |
| 261 [C <sub>7</sub> H <sub>2</sub> Cl <sub>5</sub> ] <sup>+</sup> |
| 349 [M-HCl <sub>2</sub> ] <sup>+</sup>                            |
| 385 [M-Cl] <sup>+</sup>                                           |
| 420 M <sup>+</sup>                                                |

Name: trans nonachlor

Class: Chlordane-related

Matrix: South Atlantic Dolphin Blubber  
In N. Atlantic: TRUE, In N. Pacific: TRUE  
Typically Monitored: TRUE  
Comment:

Instrument: GCxGC-TOF, EI, 70 eV  
1D RT, 2D RT (s): 1352.07, 0.95  
Quantitative Ion m/z: 409

Elemental Formula: C<sub>10</sub>H<sub>5</sub>Cl<sub>9</sub>  
Source: anthropogenic  
Identification: Authentic MS RT

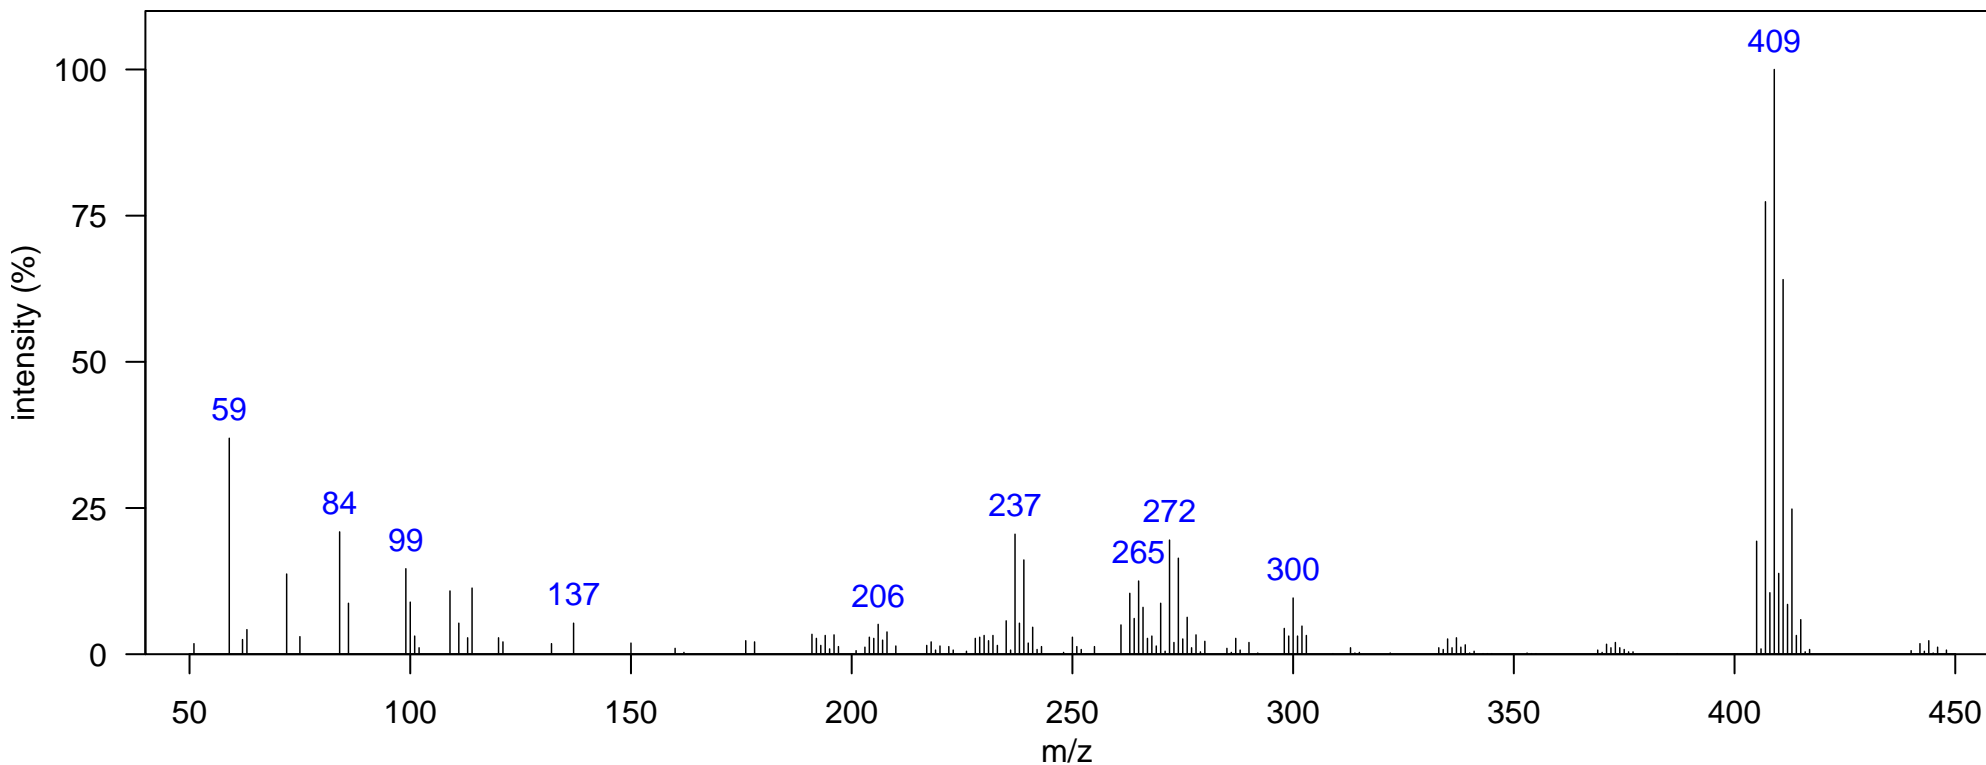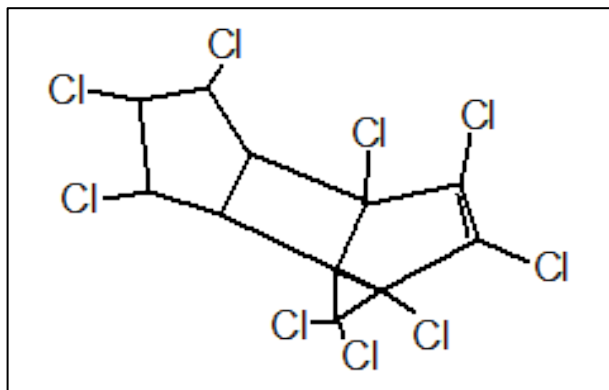

| m/z [Fragment]                                       |
|------------------------------------------------------|
| 261 [M-H <sub>4</sub> Cl <sub>5</sub> ] <sup>+</sup> |
| 409 [M-Cl] <sup>+</sup>                              |

Name: heptachlor epoxide

Class: Heptachlor-related

Matrix: South Atlantic Dolphin Blubber  
In N. Atlantic: TRUE, In N. Pacific: TRUE  
Typically Monitored: TRUE  
Comment:

Instrument: GCxGC-TOF, EI, 70 eV  
1D RT, 2D RT (s): 1303.1, 0.97  
Quantitative Ion m/z: 353

Elemental Formula: C<sub>10</sub>H<sub>5</sub>Cl<sub>7</sub>O  
Source: anthropogenic  
Identification: Authentic MS RT

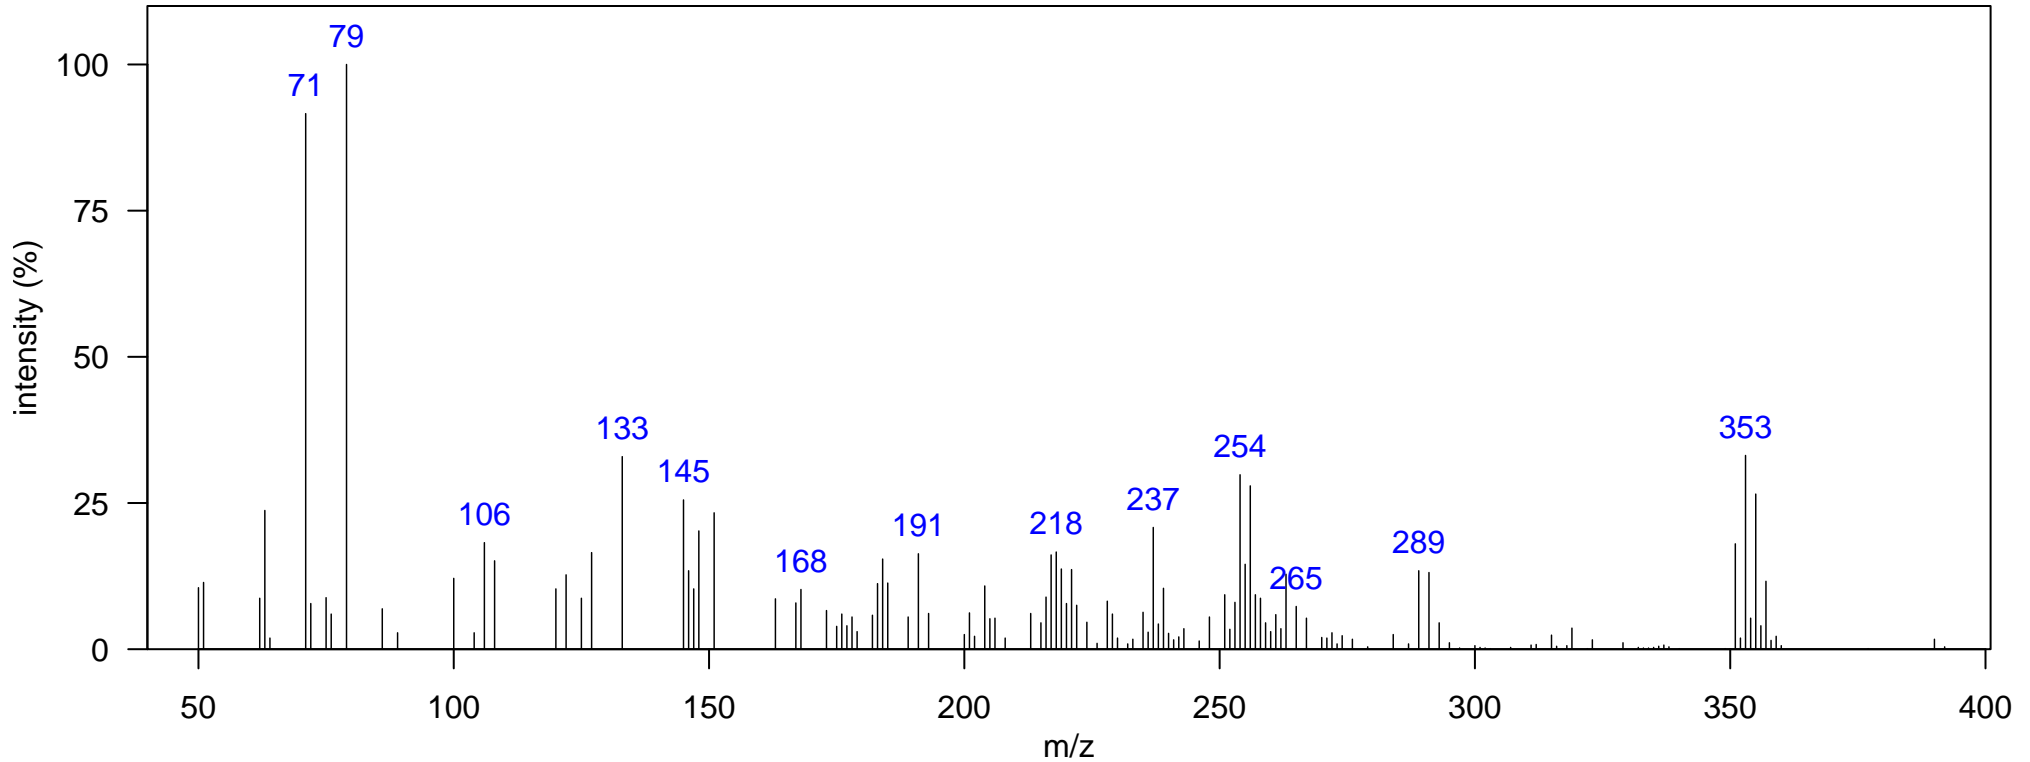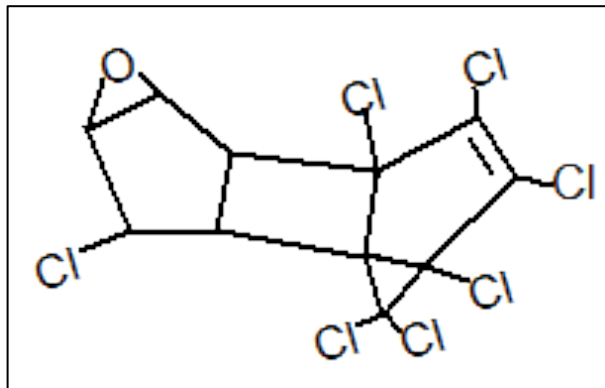

m/z [Fragment]

351 [M-Cl]<sup>+</sup>

Name: o,p'-DDE

Class: DDT-related

Matrix: South Atlantic Dolphin Blubber  
In N. Atlantic: FALSE, In N. Pacific: FALSE  
Typically Monitored: TRUE  
Comment:

Instrument: GCxGC-TOF, EI, 70 eV  
1D RT, 2D RT (s): 1327.58, 0.99  
Quantitative Ion m/z: 246

Elemental Formula: C<sub>14</sub>H<sub>8</sub>Cl<sub>4</sub>  
Source: anthropogenic  
Identification: Authentic MS RT

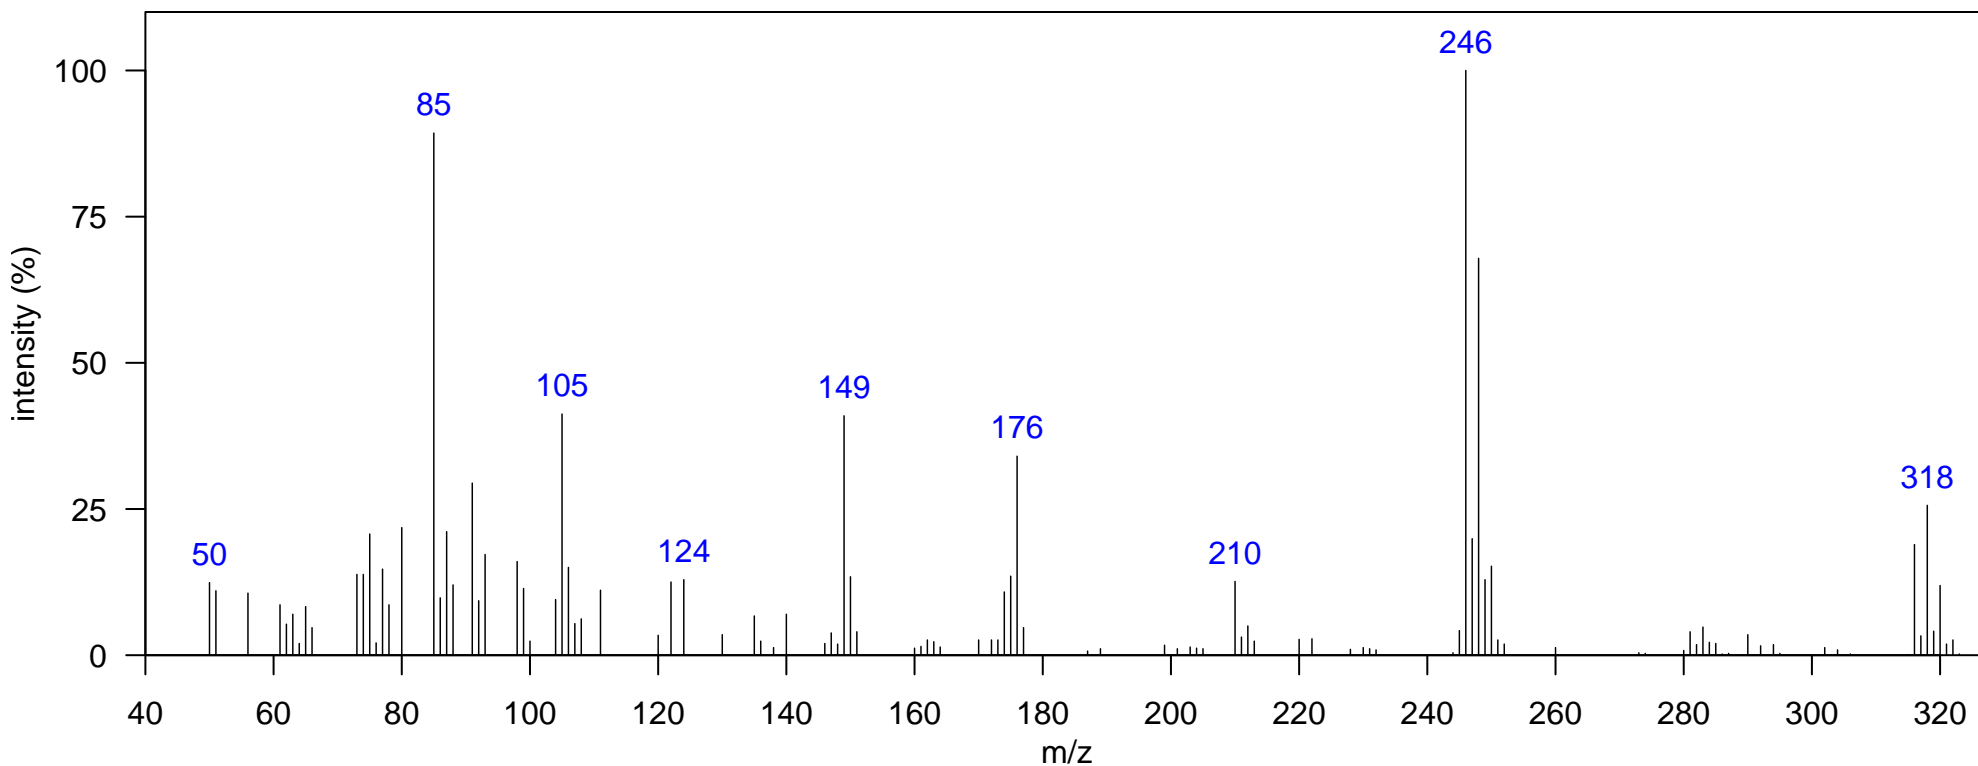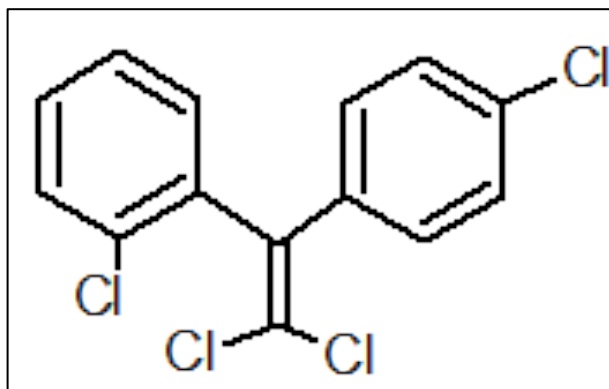

| m/z [Fragment]                        |
|---------------------------------------|
| 246 [M-Cl <sub>2</sub> ] <sup>+</sup> |
| 281 [M-Cl] <sup>+</sup>               |
| 316 M <sup>+</sup>                    |

Name: DDT related 1

Class: DDT-related

Matrix: South Atlantic Dolphin Blubber  
In N. Atlantic: TRUE, In N. Pacific: TRUE  
Typically Monitored: FALSE  
Comment: DDT related 13 (Pacific Library)

Instrument: GCxGC-TOF, EI, 70 eV  
1D RT, 2D RT (s): 1348.57, 0.997  
Quantitative Ion m/z: 235

Elemental Formula: C<sub>14</sub>H<sub>11</sub>Cl<sub>3</sub>  
Source: anthropogenic  
Identification: Reference Database MS

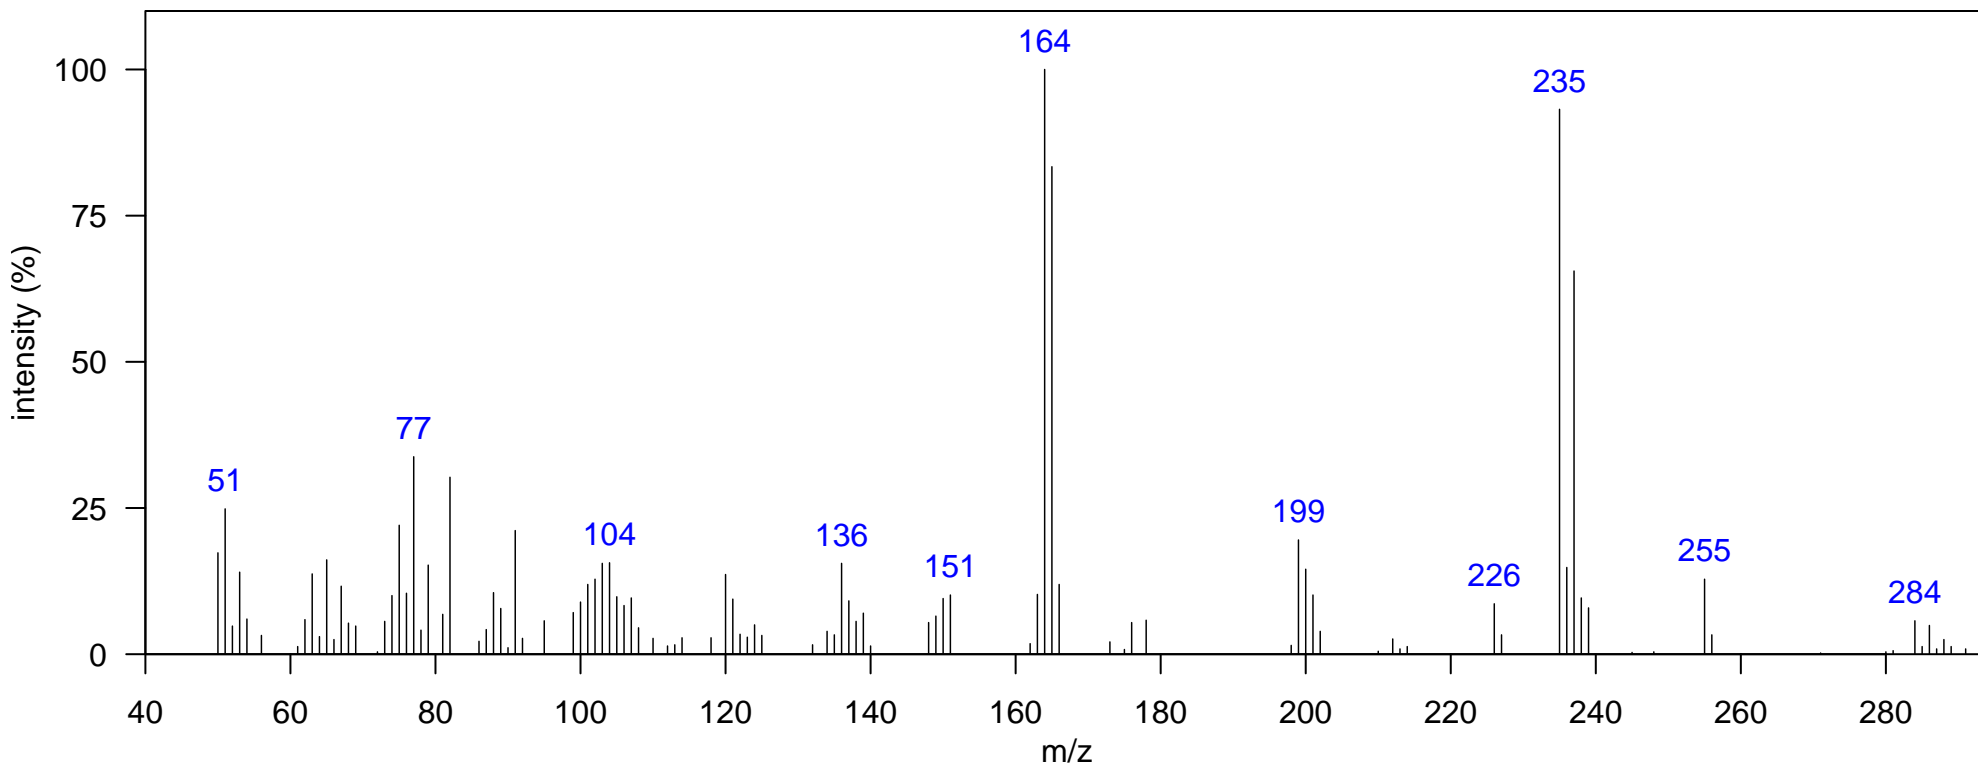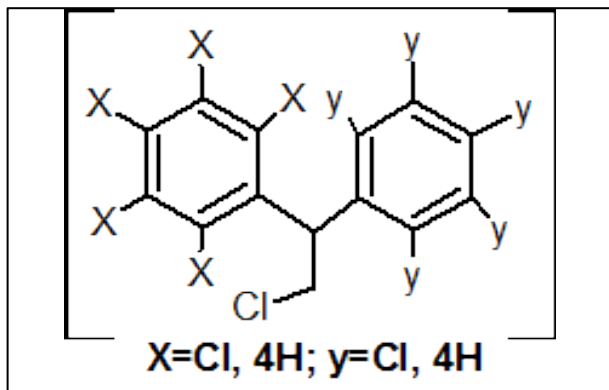

| m/z [Fragment]                          |
|-----------------------------------------|
| 235 [M-CH <sub>2</sub> Cl] <sup>+</sup> |
| 284 M <sup>+</sup>                      |

Name: p,p'-DDE

Class: DDT-related

Matrix: South Atlantic Dolphin Blubber  
In N. Atlantic: TRUE, In N. Pacific: FALSE  
Typically Monitored: TRUE  
Comment:

Instrument: GCxGC-TOF, EI, 70 eV  
1D RT, 2D RT (s): 1362.56, 1.01  
Quantitative Ion m/z: 246

Elemental Formula: C<sub>14</sub>H<sub>8</sub>Cl<sub>4</sub>  
Source: anthropogenic  
Identification: Authentic MS RT

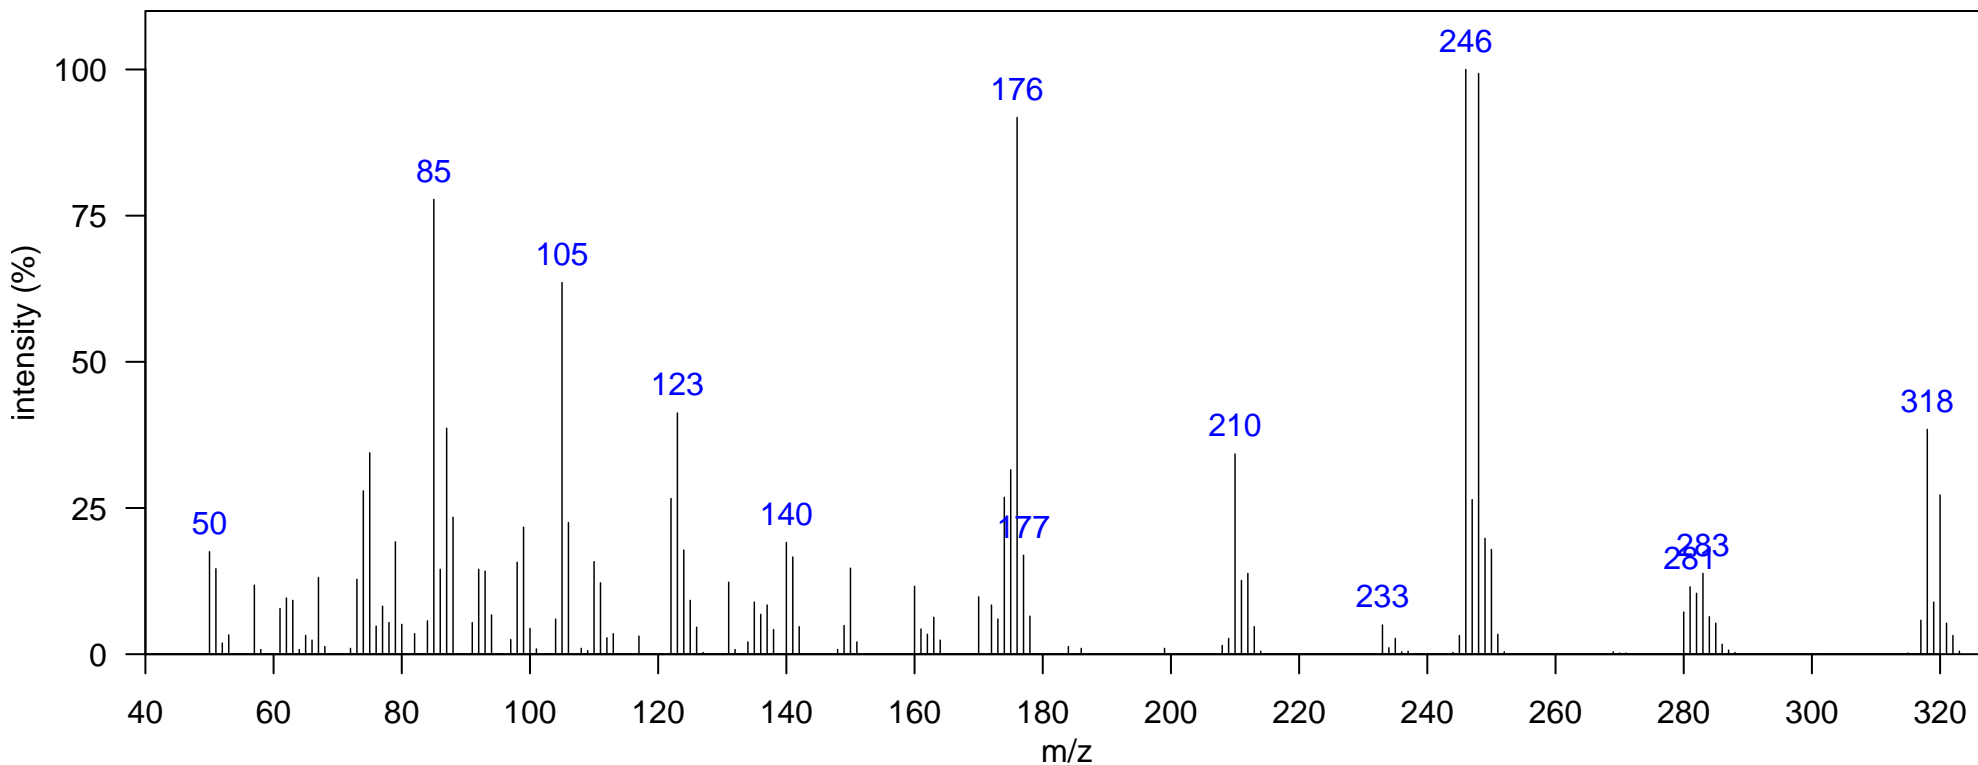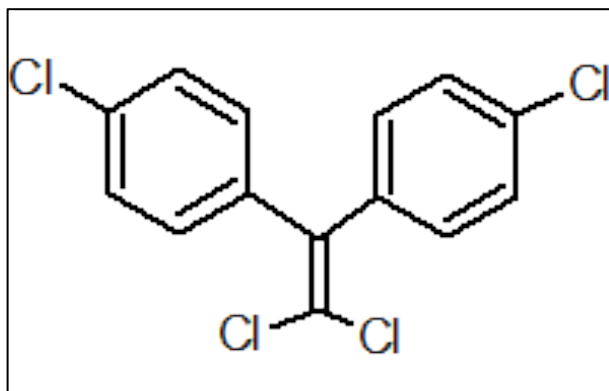

| m/z [Fragment]                          |
|-----------------------------------------|
| 246 [M-CHCl <sub>2</sub> ] <sup>+</sup> |
| 316 M <sup>+</sup>                      |

Name: DDT related 2

Class: DDT-related

Matrix: South Atlantic Dolphin Blubber  
In N. Atlantic: TRUE, In N. Pacific: FALSE  
Typically Monitored: FALSE  
Comment: Suggested DDE isomer

Instrument: GCxGC-TOF, EI, 70 eV  
1D RT, 2D RT (s): 1380.05, 0.977  
Quantitative Ion m/z: 246

Elemental Formula:  
Source: anthropogenic  
Identification: Manual

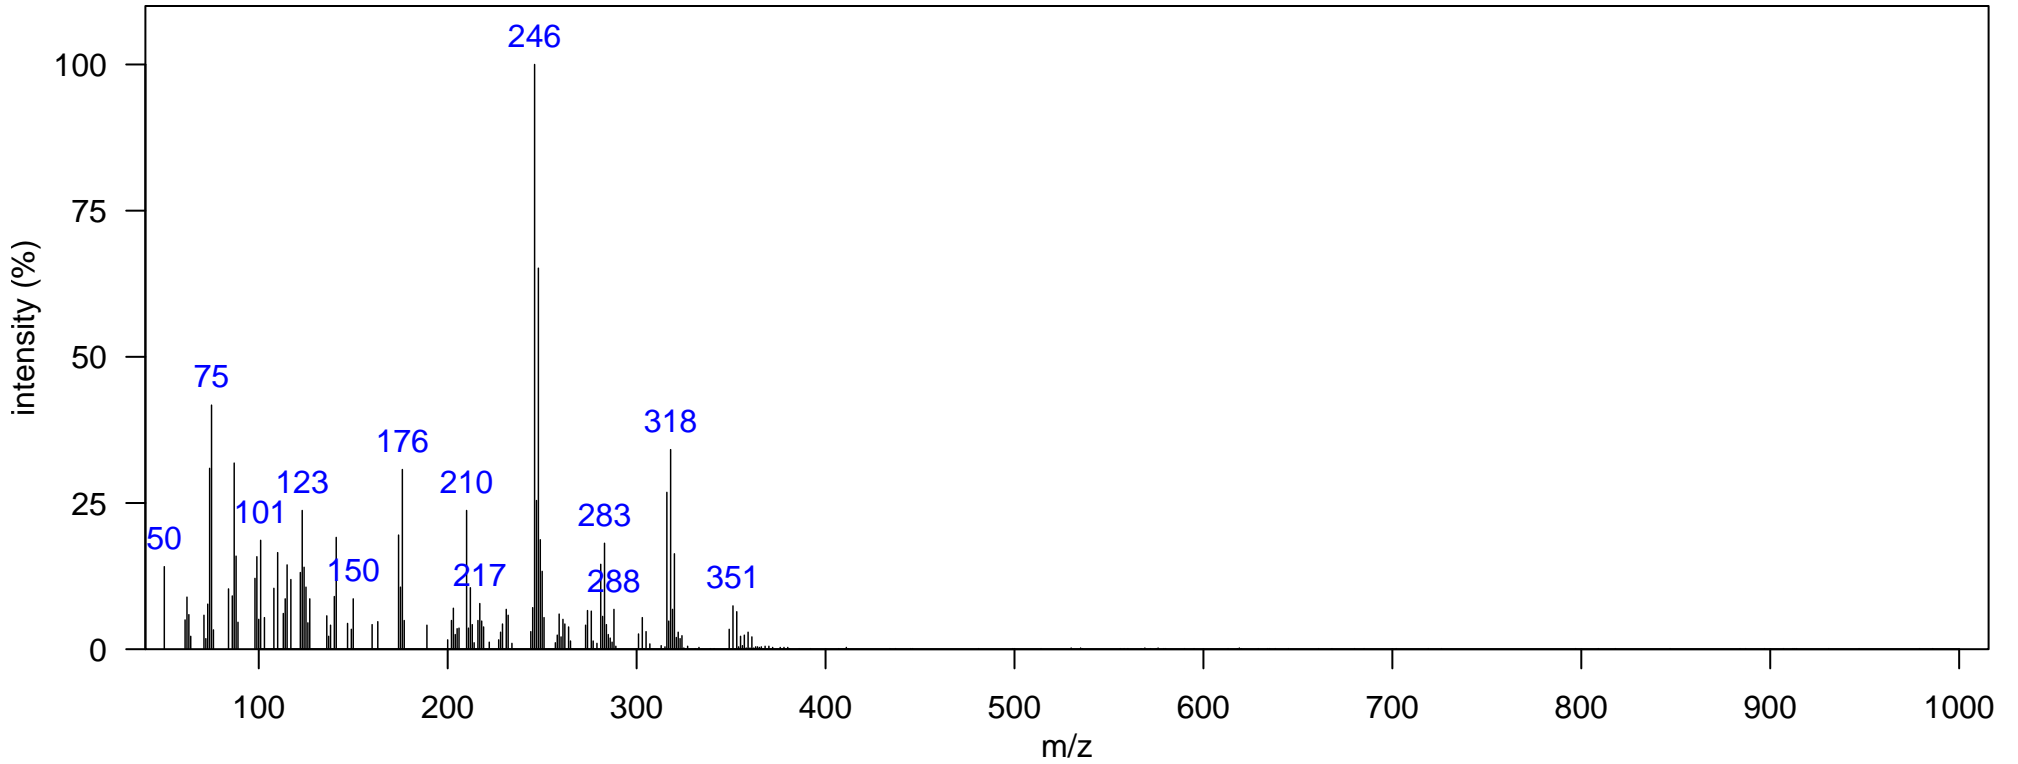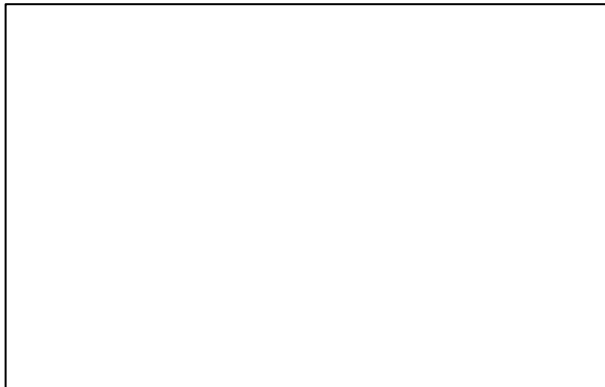

| m/z [Fragment]                          |
|-----------------------------------------|
| 246 [M-CHCl <sub>2</sub> ] <sup>+</sup> |
| 281 [M-Cl] <sup>+</sup>                 |
| 316 M <sup>+</sup>                      |



Name: p,p'-DDD

Class: DDT-related

Matrix: South Atlantic Dolphin Blubber  
In N. Atlantic: TRUE, In N. Pacific: TRUE  
Typically Monitored: TRUE  
Comment:

Instrument: GCxGC-TOF, EI, 70 eV  
1D RT, 2D RT (s): 1411.54, 1.082  
Quantitative Ion m/z: 237

Elemental Formula: C<sub>14</sub>H<sub>10</sub>Cl<sub>4</sub>  
Source: anthropogenic  
Identification: Authentic MS RT

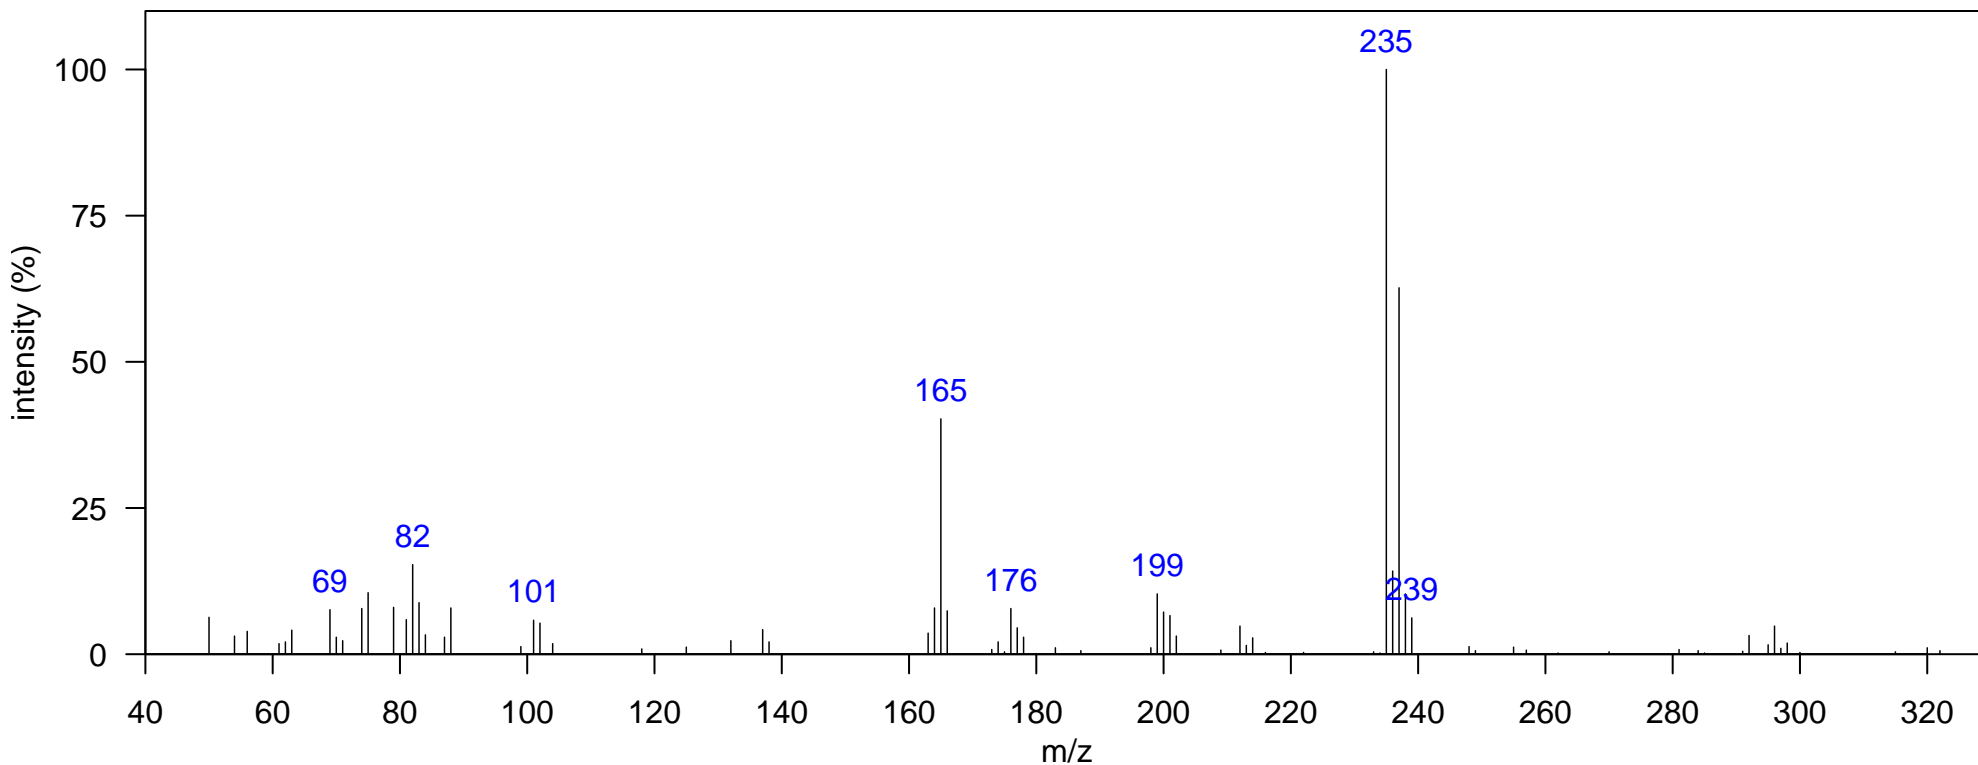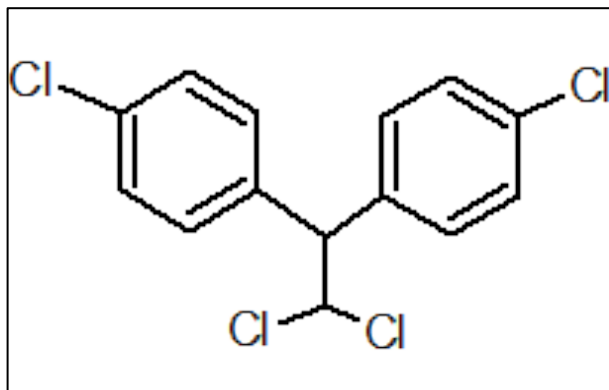

| m/z [Fragment]                          |
|-----------------------------------------|
| 235 [M-CHCl <sub>2</sub> ] <sup>+</sup> |

Name: DDT related 3

Class: DDT-related

Matrix: South Atlantic Dolphin Blubber  
In N. Atlantic: TRUE, In N. Pacific: TRUE  
Typically Monitored: FALSE  
Comment: DDT related 10 (Pacific Library)

Instrument: GCxGC-TOF, EI, 70 eV  
1D RT, 2D RT (s): 1460.51, 1.195  
Quantitative Ion m/z: 235

Elemental Formula:  
Source: anthropogenic  
Identification: Reference Database MS

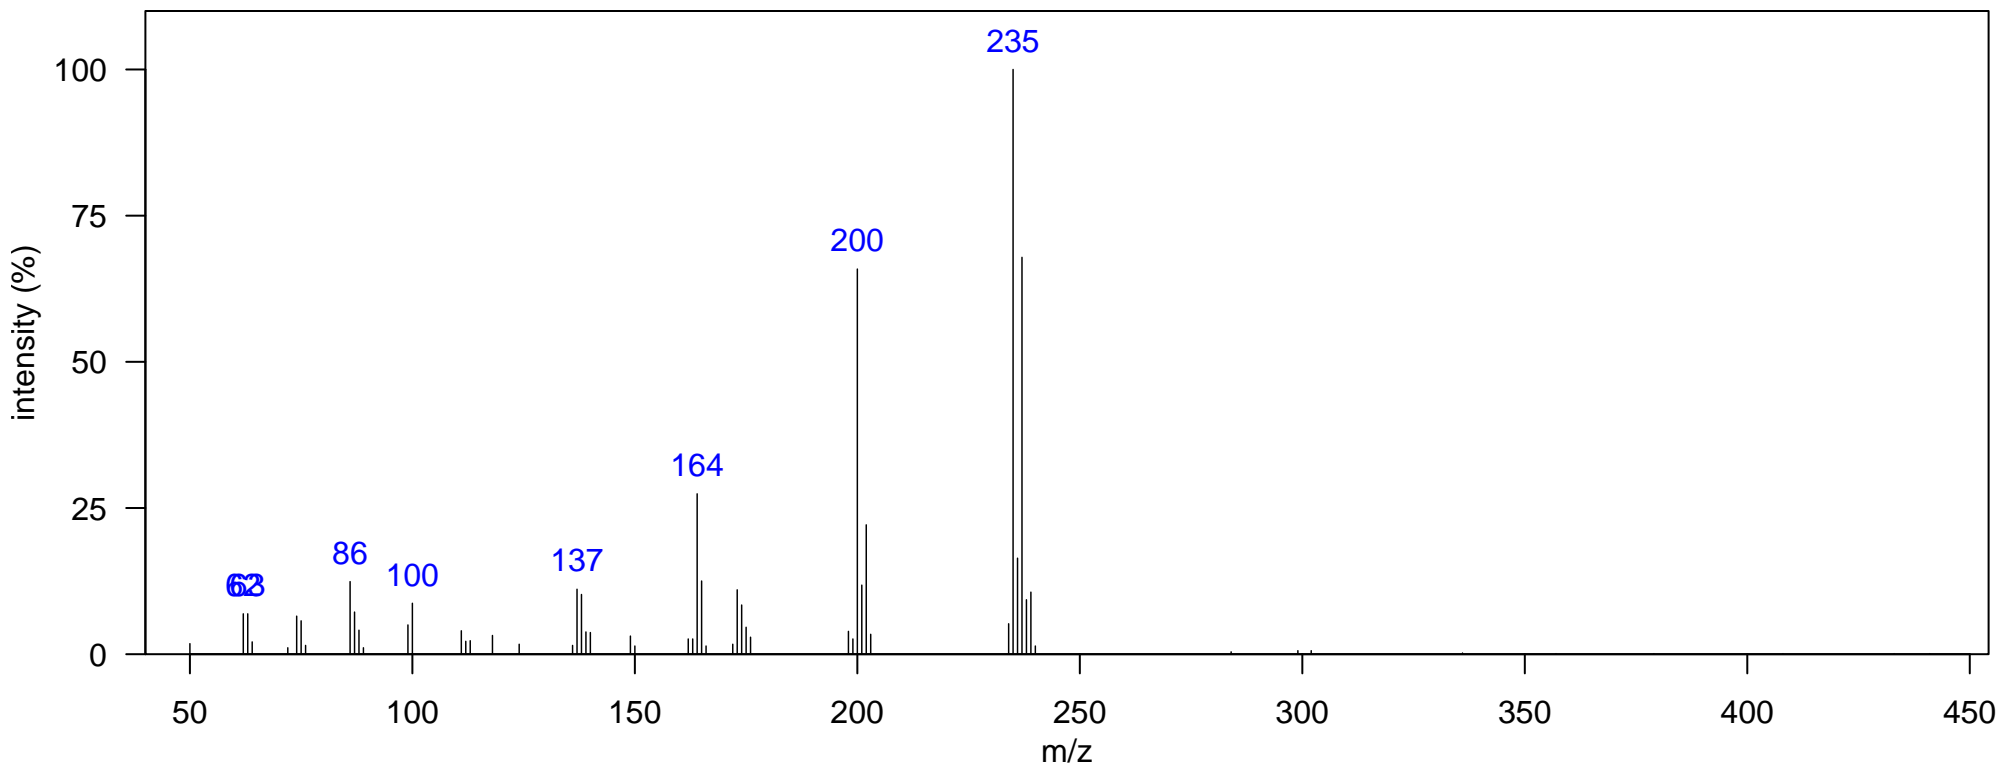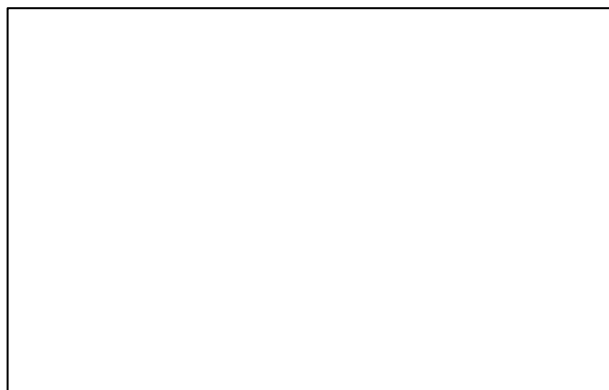

| m/z [Fragment] |
|----------------|
|----------------|

Name: DDT related 4

Class: DDT-related

Matrix: South Atlantic Dolphin Blubber  
In N. Atlantic: TRUE, In N. Pacific: TRUE  
Typically Monitored: FALSE  
Comment: DDT related 18 (Pacific Library). Suggested DDE backbone structure, but containing 7 chlorines

Instrument: GCxGC-TOF, EI, 70 eV  
1D RT, 2D RT (s): 1544.46, 1.102  
Quantitative Ion m/z: 420

Elemental Formula: C<sub>14</sub>H<sub>5</sub>Cl<sub>7</sub>  
Source: anthropogenic  
Identification: Manual-Congener Group

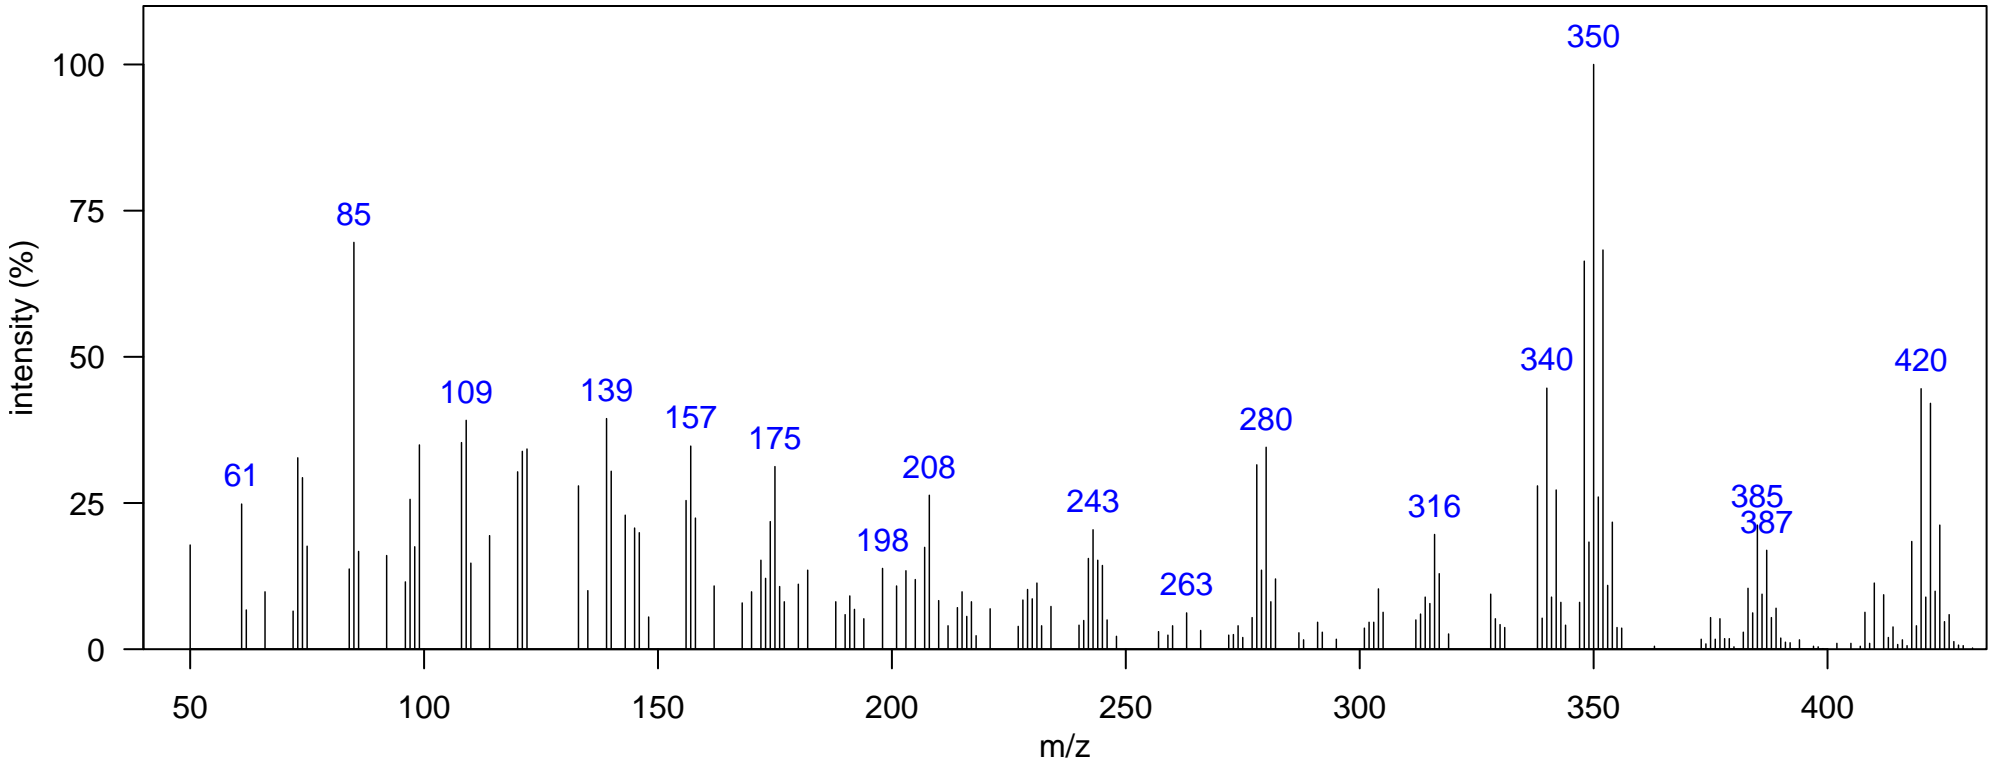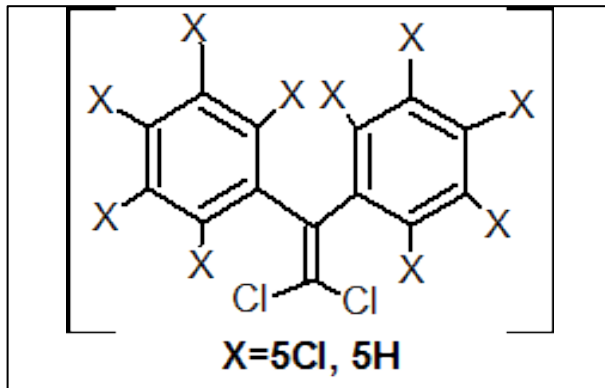

| m/z [Fragment]                        |
|---------------------------------------|
| 278 [M-Cl <sub>4</sub> ] <sup>+</sup> |
| 348 [M-Cl <sub>2</sub> ] <sup>+</sup> |
| 383 [M-Cl] <sup>+</sup>               |
| 418 M <sup>+</sup>                    |

Name: DDT related 5

Class: DDT-related

Matrix: South Atlantic Dolphin Blubber

Instrument: GCxGC-TOF, EI, 70 eV

Elemental Formula: C<sub>14</sub>H<sub>5</sub>Cl<sub>7</sub>

In N. Atlantic: FALSE, In N. Pacific: FALSE

1D RT, 2D RT (s): 1554.95, 1.142

Source: anthropogenic

Typically Monitored: FALSE

Quantitative Ion m/z: 420

Identification: Manual-Congener Group

Comment: Suggested DDE backbone structure, but containing 7 chlorines

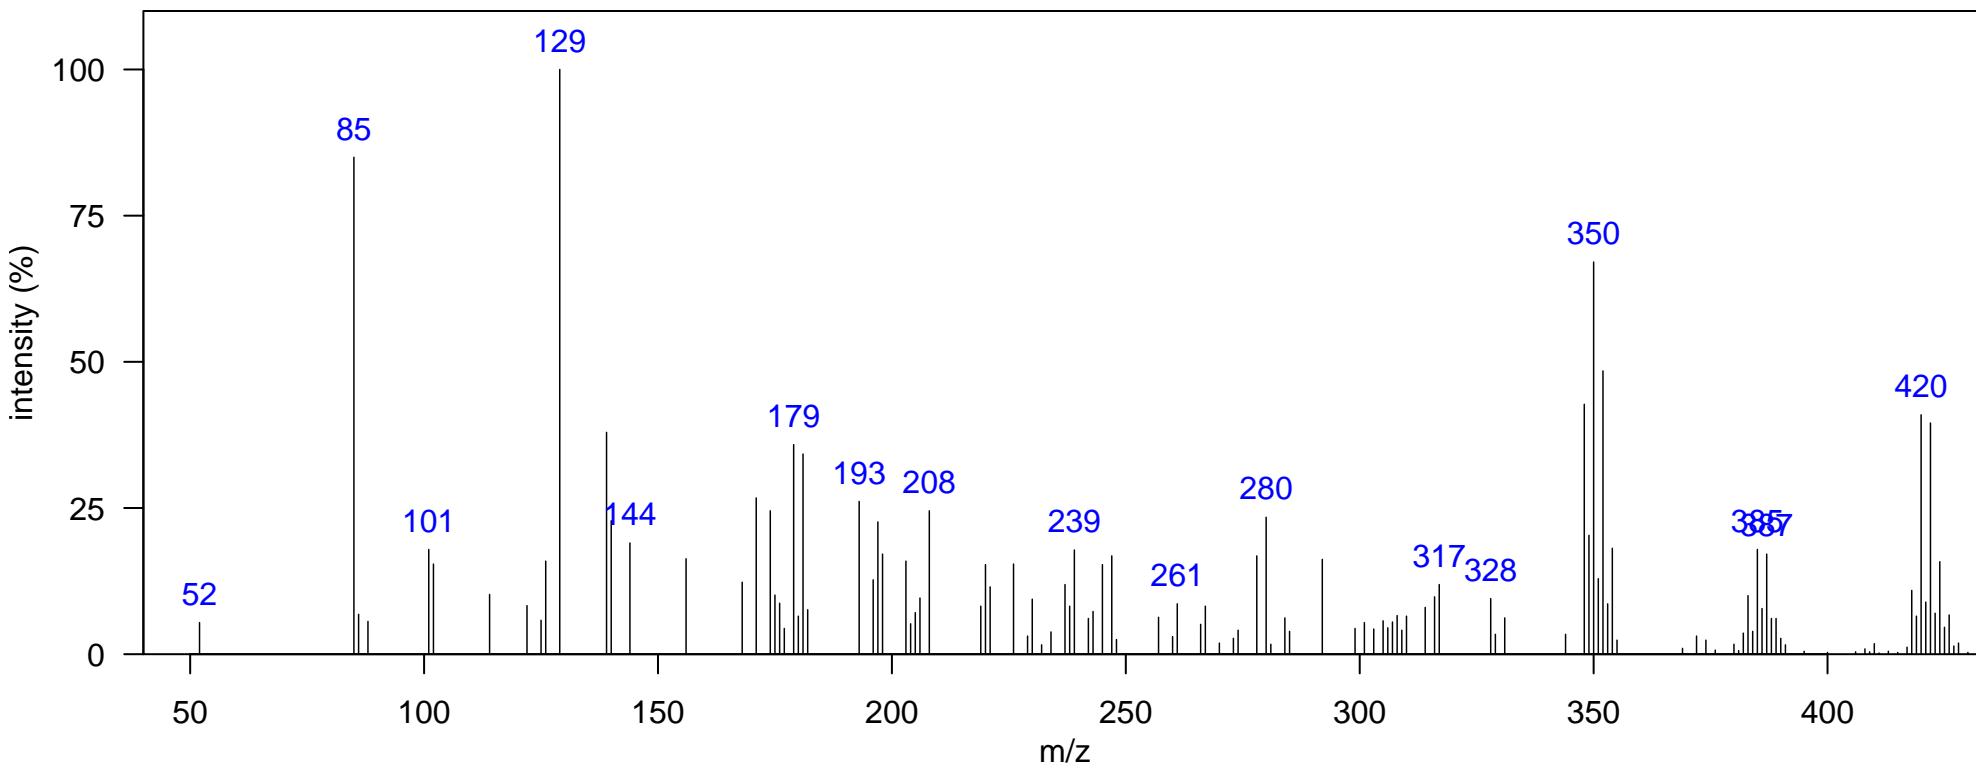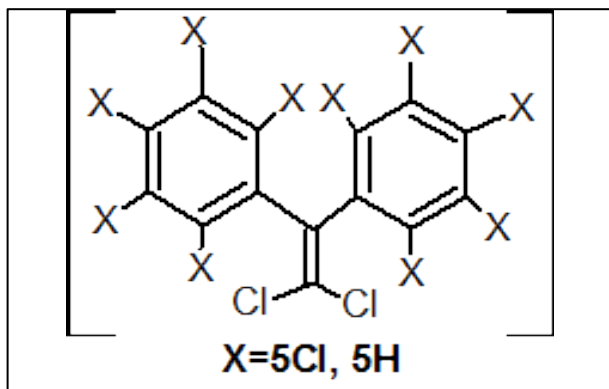

| m/z [Fragment]                        |
|---------------------------------------|
| 278 [M-Cl <sub>4</sub> ] <sup>+</sup> |
| 348 [M-Cl <sub>2</sub> ] <sup>+</sup> |
| 383 [M-Cl] <sup>+</sup>               |
| 418 M <sup>+</sup>                    |

Name: DDT related 6

Class: DDT-related

Matrix: South Atlantic Dolphin Blubber  
In N. Atlantic: TRUE, In N. Pacific: TRUE  
Typically Monitored: FALSE  
Comment: DDT related 19 (Pacific Library). Suggested DDE backbone structure, but containing 7 chlorines

Instrument: GCxGC-TOF, EI, 70 eV  
1D RT, 2D RT (s): 1558.45, 1.155  
Quantitative Ion m/z: 420

Elemental Formula: C<sub>14</sub>H<sub>5</sub>Cl<sub>7</sub>  
Source: anthropogenic  
Identification: Manual-Congener Group

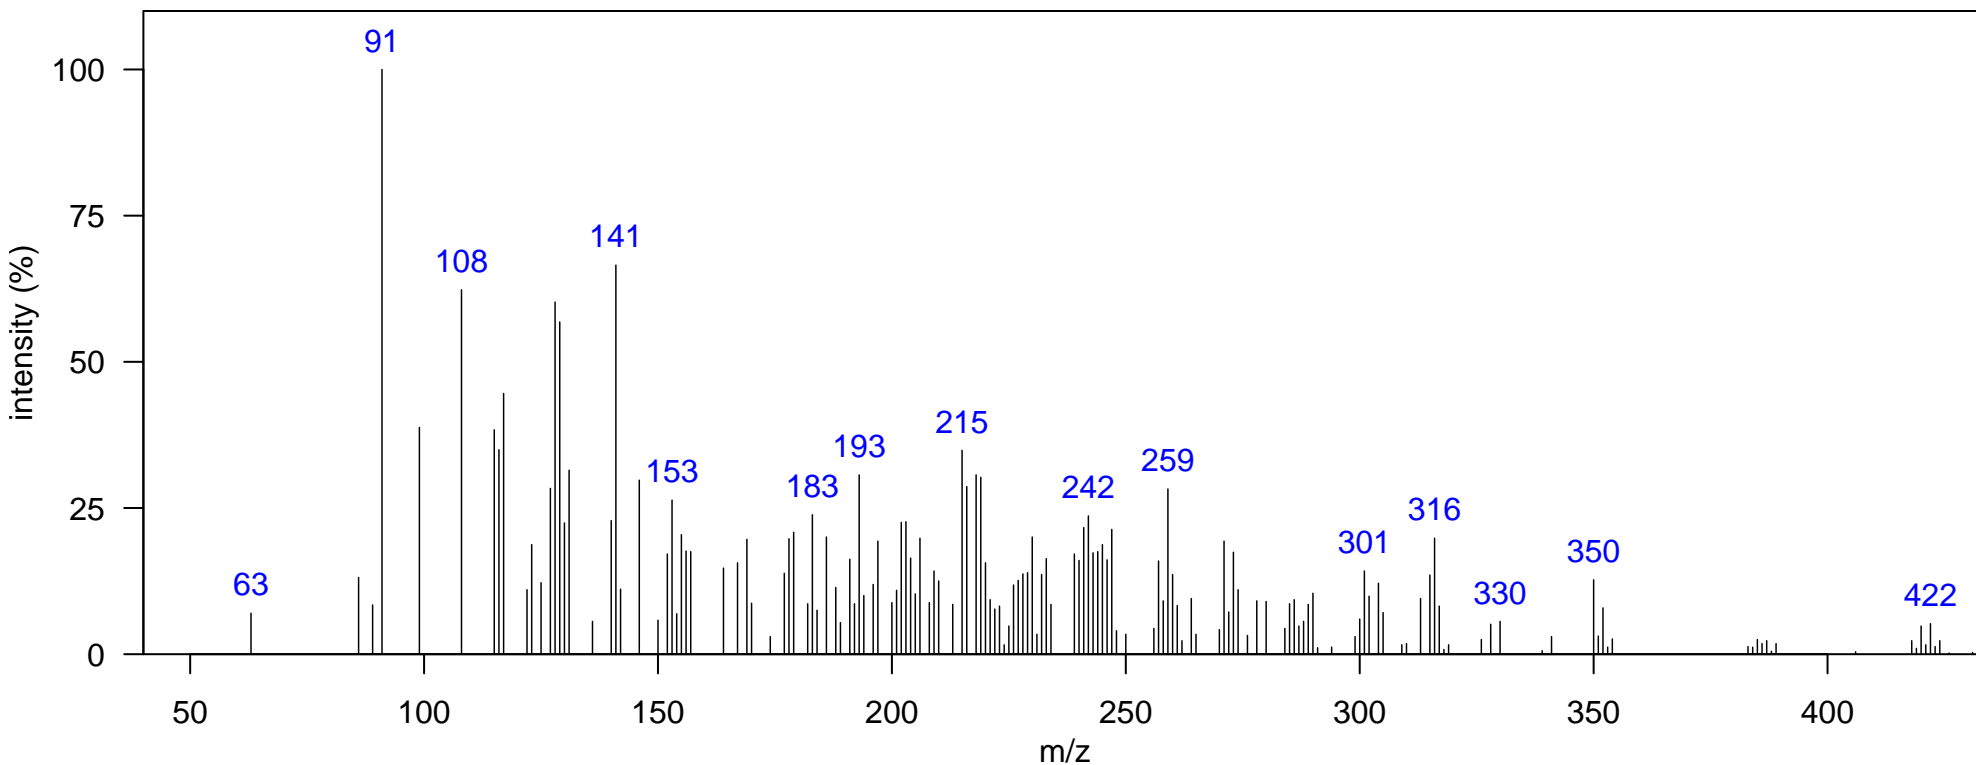

| m/z [Fragment]                        |
|---------------------------------------|
| 278 [M-Cl <sub>4</sub> ] <sup>+</sup> |
| 348 [M-Cl <sub>2</sub> ] <sup>+</sup> |
| 383 [M-Cl] <sup>+</sup>               |
| 418 M <sup>+</sup>                    |

Name: DDT related 7

Class: DDT-related

Matrix: South Atlantic Dolphin Blubber

Instrument: GCxGC-TOF, EI, 70 eV

Elemental Formula: C<sub>14</sub>H<sub>5</sub>Cl<sub>7</sub>

In N. Atlantic: FALSE, In N. Pacific: TRUE

1D RT, 2D RT (s): 1582.94, 1.188

Source: anthropogenic

Typically Monitored: FALSE

Quantitative Ion m/z: 350

Identification: Manual-Congener Group

Comment: DDT related 20 (Pacific Library). Suggested DDE backbone structure, but containing 7 chlorines

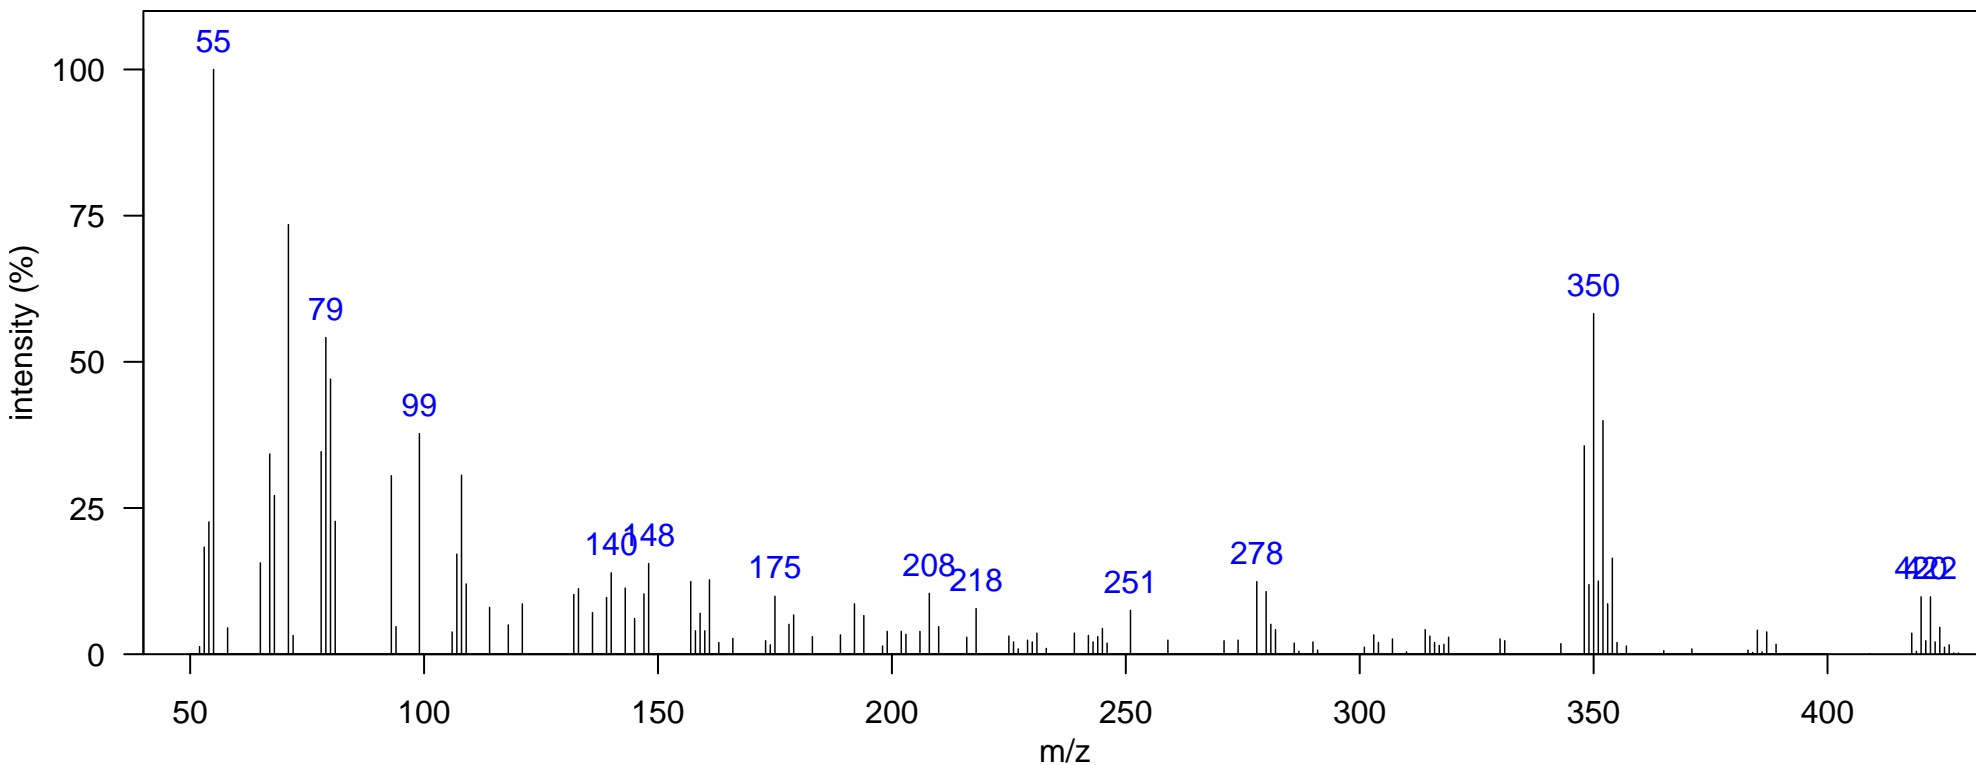

| m/z [Fragment]                        |
|---------------------------------------|
| 278 [M-Cl <sub>4</sub> ] <sup>+</sup> |
| 348 [M-Cl <sub>2</sub> ] <sup>+</sup> |
| 383 [M-Cl] <sup>+</sup>               |
| 418 M <sup>+</sup>                    |

Name: DDT related 8

Class: DDT-related

Matrix: South Atlantic Dolphin Blubber

Instrument: GCxGC-TOF, EI, 70 eV

Elemental Formula: C<sub>14</sub>H<sub>4</sub>Cl<sub>8</sub>

In N. Atlantic: FALSE, In N. Pacific: TRUE

1D RT, 2D RT (s): 1656.4, 1.379

Source: anthropogenic

Typically Monitored: FALSE

Quantitative Ion m/z: 456

Identification: Manual-Congener Group

Comment: DDT related 23 (Pacific Library). Suggested DDE backbone

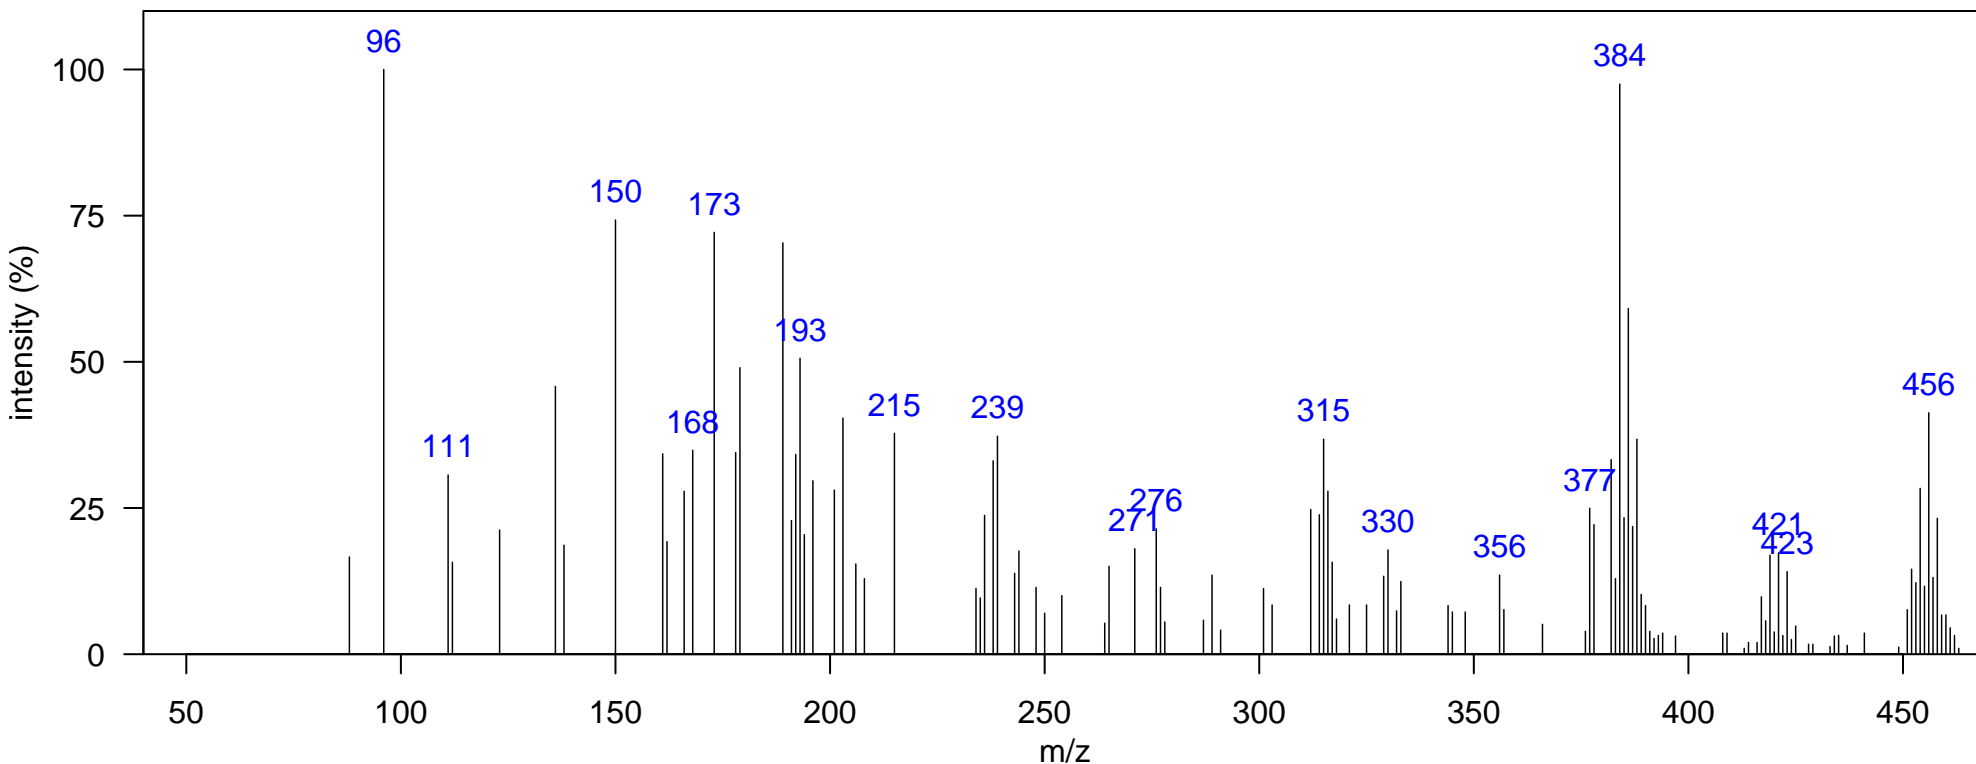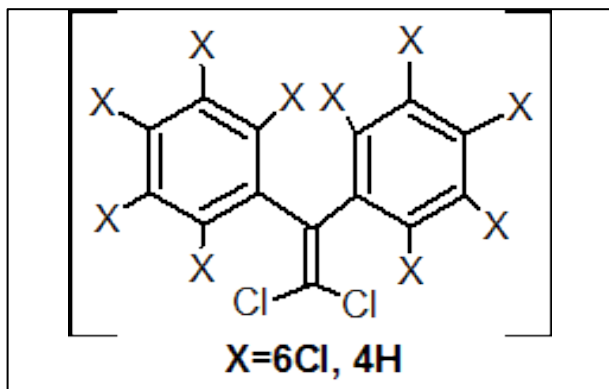

| m/z [Fragment]                        |
|---------------------------------------|
| 382 [M-Cl <sub>2</sub> ] <sup>+</sup> |
| 417 [M-Cl] <sup>+</sup>               |
| 452 M <sup>+</sup>                    |

Name: TCPM 1

Class: TCPM

Matrix: South Atlantic Dolphin Blubber  
In N. Atlantic: TRUE, In N. Pacific: TRUE  
Typically Monitored: FALSE  
Comment: TCPM 5 (Pacific Library)

Instrument: GCxGC-TOF, EI, 70 eV  
1D RT, 2D RT (s): 1554.95, 1.195  
Quantitative Ion m/z: 311

Elemental Formula: C<sub>19</sub>H<sub>13</sub>Cl<sub>3</sub>  
Source: anthropogenic  
Identification: Authentic MS

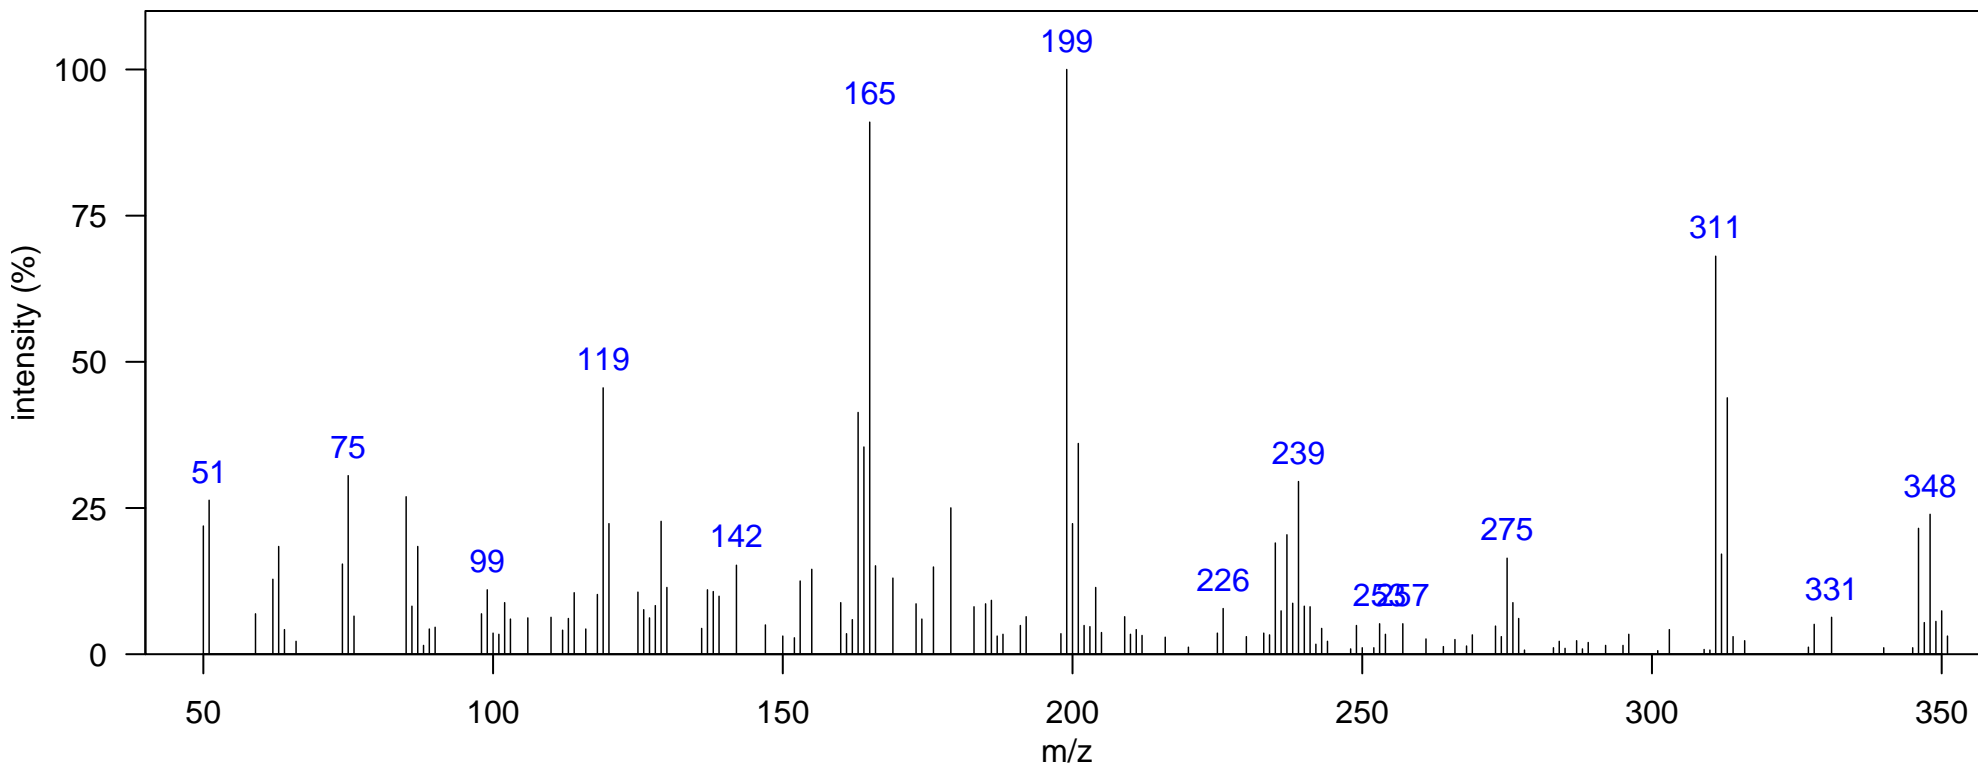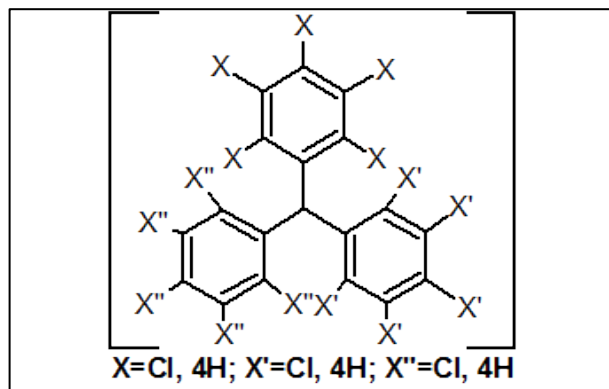

| m/z [Fragment]                         |
|----------------------------------------|
| 275 [M-HCl <sub>2</sub> ] <sup>+</sup> |
| 311 [M-Cl] <sup>+</sup>                |
| 346 M <sup>+</sup>                     |



Name: Tris(4-chlorophenyl)methane (TCPM)

Class: TCPM

Matrix: South Atlantic Dolphin Blubber  
In N. Atlantic: TRUE, In N. Pacific: TRUE  
Typically Monitored: FALSE  
Comment:

Instrument: GCxGC-TOF, EI, 70 eV  
1D RT, 2D RT (s): 1596.93, 1.28  
Quantitative Ion m/z: 311

Elemental Formula: C<sub>19</sub>H<sub>13</sub>Cl<sub>3</sub>  
Source: anthropogenic  
Identification: Authentic MS RT

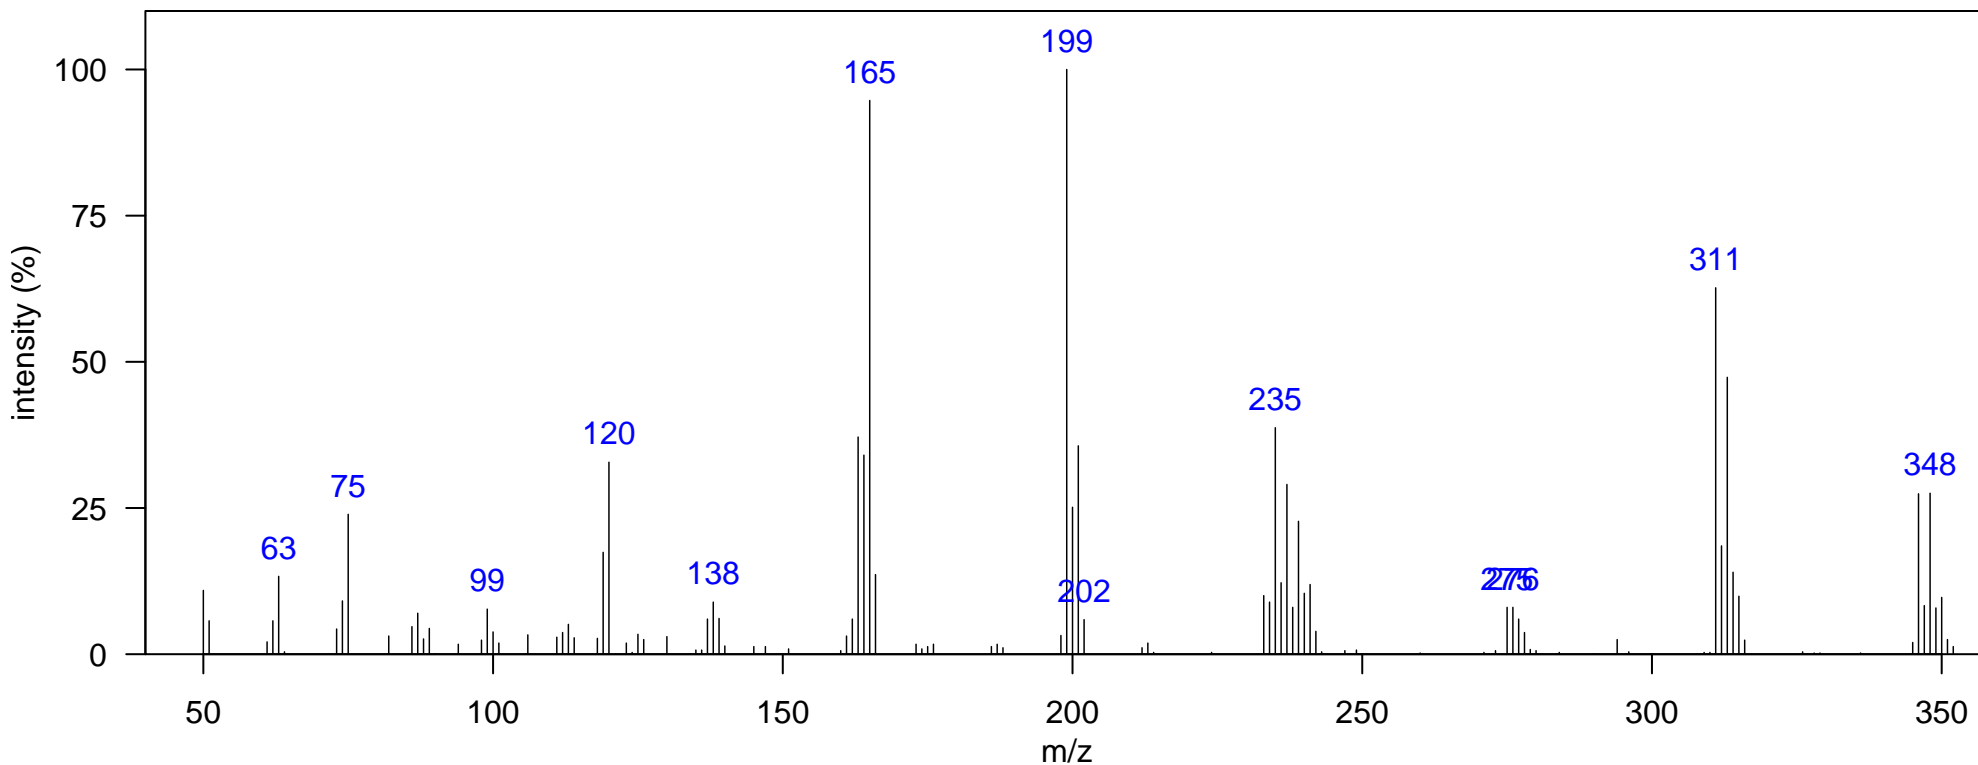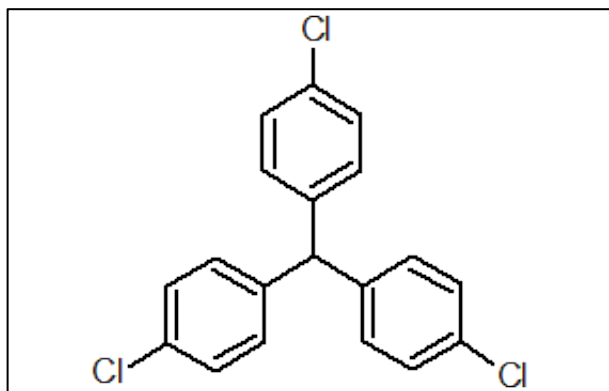

| m/z [Fragment]                         |
|----------------------------------------|
| 275 [M-HCl <sub>2</sub> ] <sup>+</sup> |
| 311 [M-Cl] <sup>+</sup>                |
| 346 M <sup>+</sup>                     |

Name: Tris(4-chlorophenyl)methanol (TCPMOH)

Class: TCPMOH

Matrix: South Atlantic Dolphin Blubber  
In N. Atlantic: TRUE, In N. Pacific: TRUE  
Typically Monitored: FALSE  
Comment:

Instrument: GCxGC-TOF, EI, 70 eV  
1D RT, 2D RT (s): 1677.38, 1.538  
Quantitative Ion m/z: 139

Elemental Formula: C<sub>19</sub>H<sub>13</sub>Cl<sub>3</sub>O  
Source: anthropogenic  
Identification: Authentic MS RT

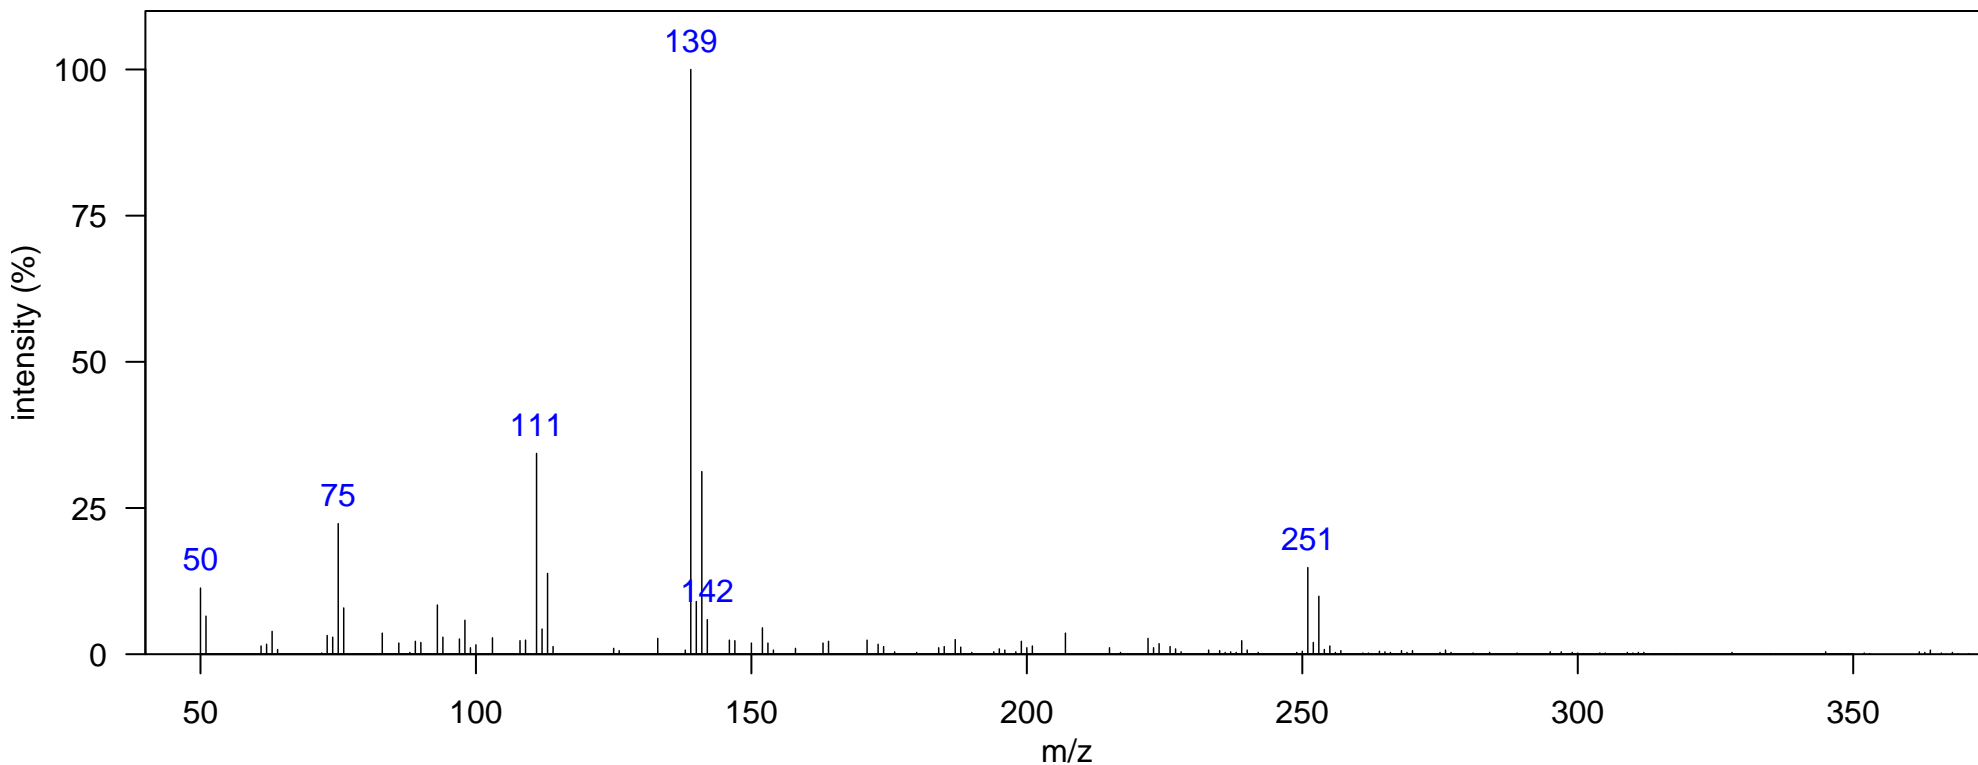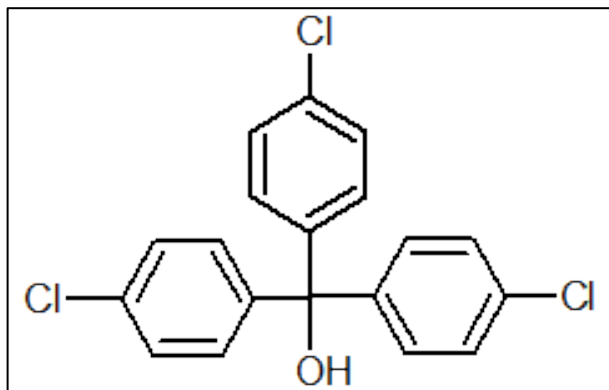

| m/z [Fragment] |
|----------------|
|----------------|

Name: toxaphene 1

Class: Toxaphene

Matrix: South Atlantic Dolphin Blubber  
In N. Atlantic: TRUE, In N. Pacific: TRUE  
Typically Monitored: TRUE  
Comment: toxaphene 17 (Pacific Library)

Instrument: GCxGC-TOF, EI, 70 eV  
1D RT, 2D RT (s): 1491.99, 1.043  
Quantitative Ion m/z: 339

Elemental Formula: C<sub>10</sub>H<sub>8</sub>Cl<sub>8</sub>  
Source: anthropogenic  
Identification: Authentic MS RT

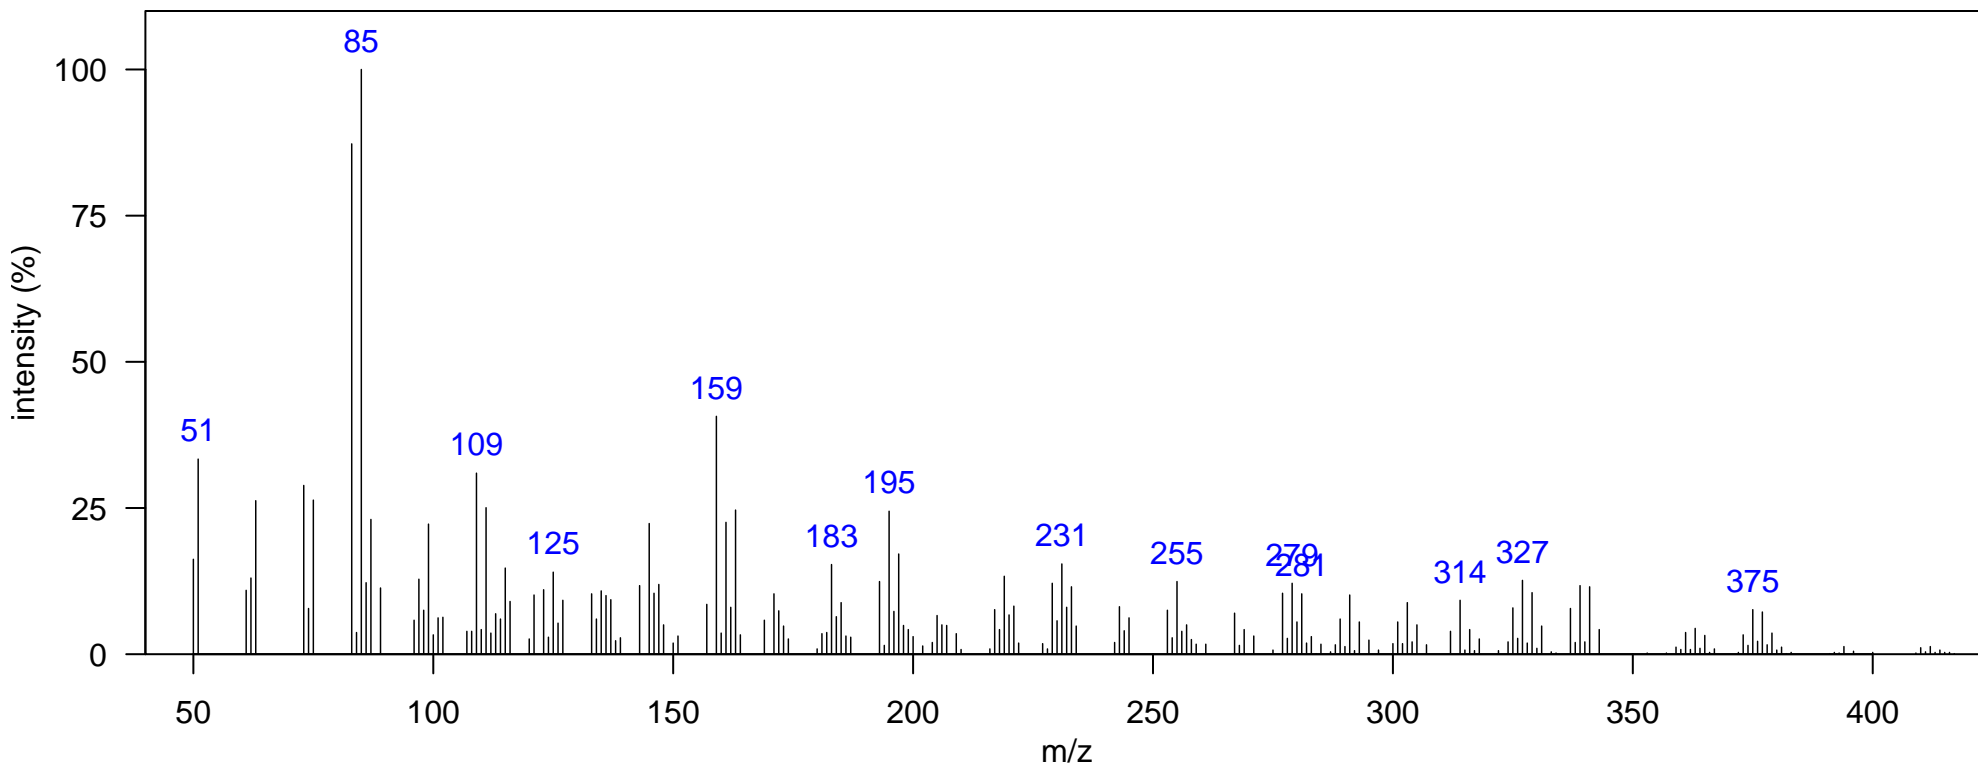

| m/z [Fragment] |
|----------------|
|----------------|

Name: mirex 2Cl 1

Class: Mirex-related

Matrix: South Atlantic Dolphin Blubber  
In N. Atlantic: FALSE, In N. Pacific: FALSE  
Typically Monitored: FALSE  
Comment:

Instrument: GCxGC-TOF, EI, 70 eV  
1D RT, 2D RT (s): 1418.53, 1.016  
Quantitative Ion m/z: 441

Elemental Formula: C<sub>10</sub>H<sub>2</sub>Cl<sub>10</sub>  
Source: anthropogenic  
Identification: Manual-Congener Group

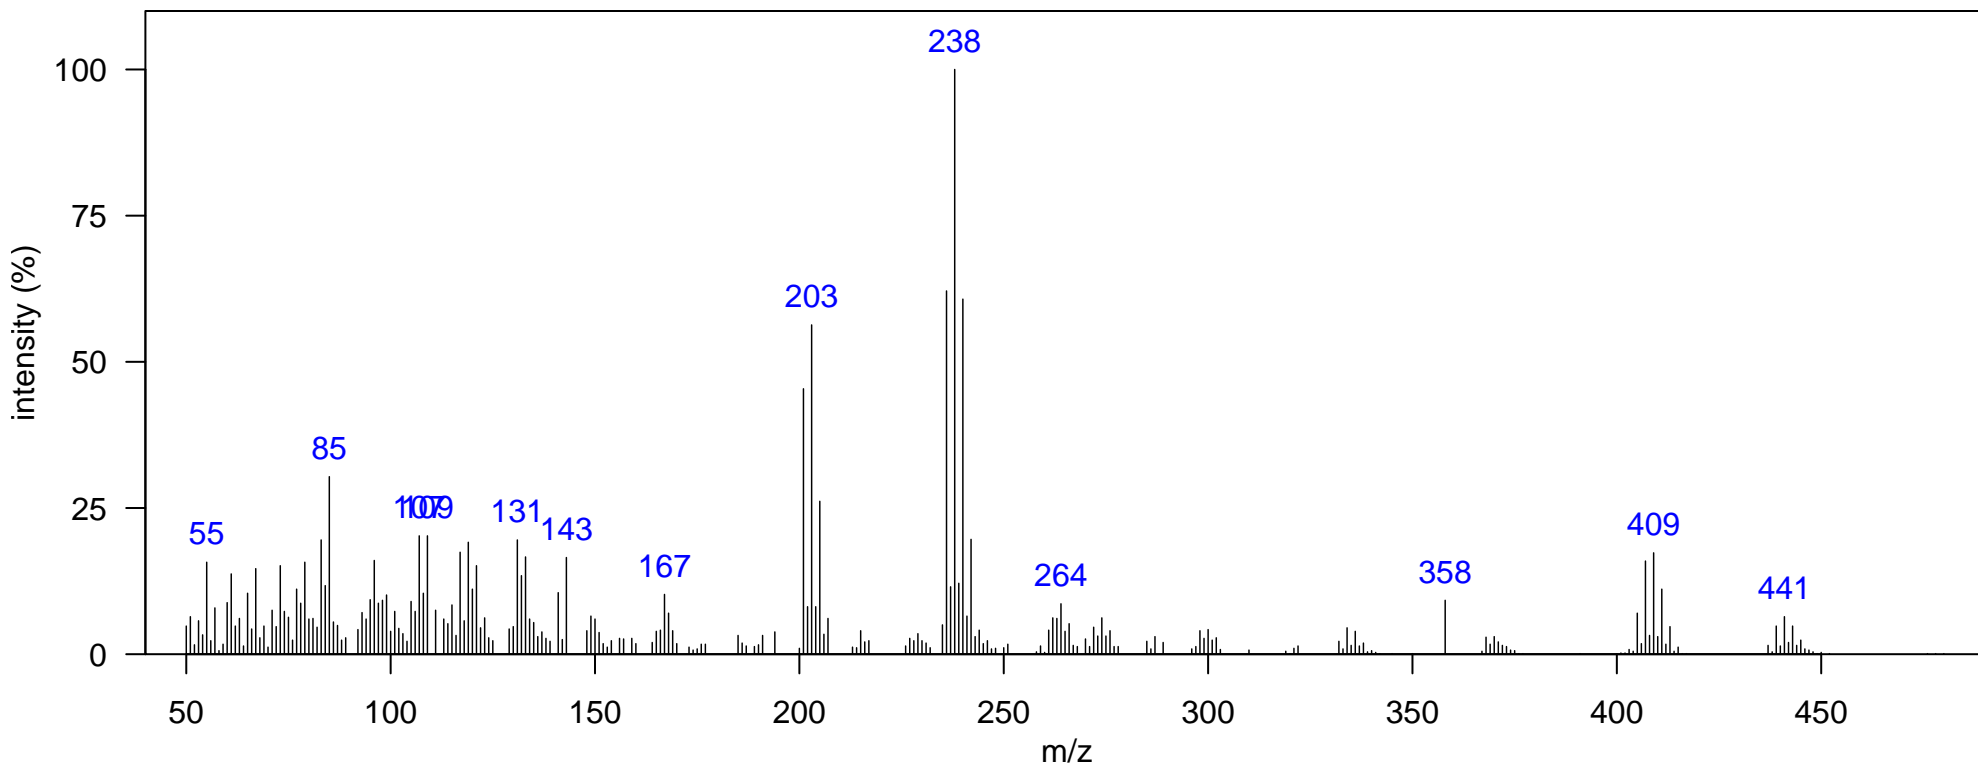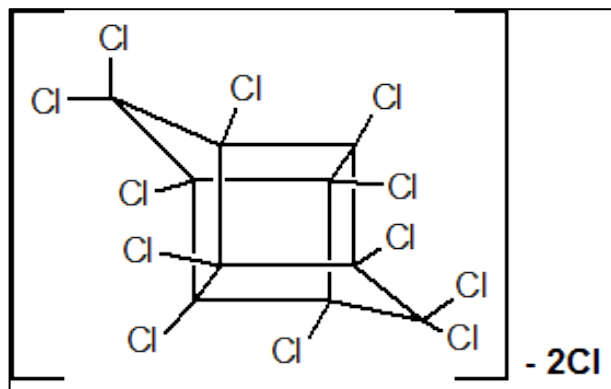

| m/z [Fragment]          |
|-------------------------|
| 437 [M-Cl] <sup>+</sup> |

Name: mirex 2Cl 2

Class: Mirex-related

Matrix: South Atlantic Dolphin Blubber  
In N. Atlantic: FALSE, In N. Pacific: FALSE  
Typically Monitored: FALSE  
Comment:

Instrument: GCxGC-TOF, EI, 70 eV  
1D RT, 2D RT (s): 1460.51, 1.063  
Quantitative Ion m/z: 441

Elemental Formula: C<sub>10</sub>H<sub>2</sub>Cl<sub>10</sub>  
Source: anthropogenic  
Identification: Manual-Congener Group

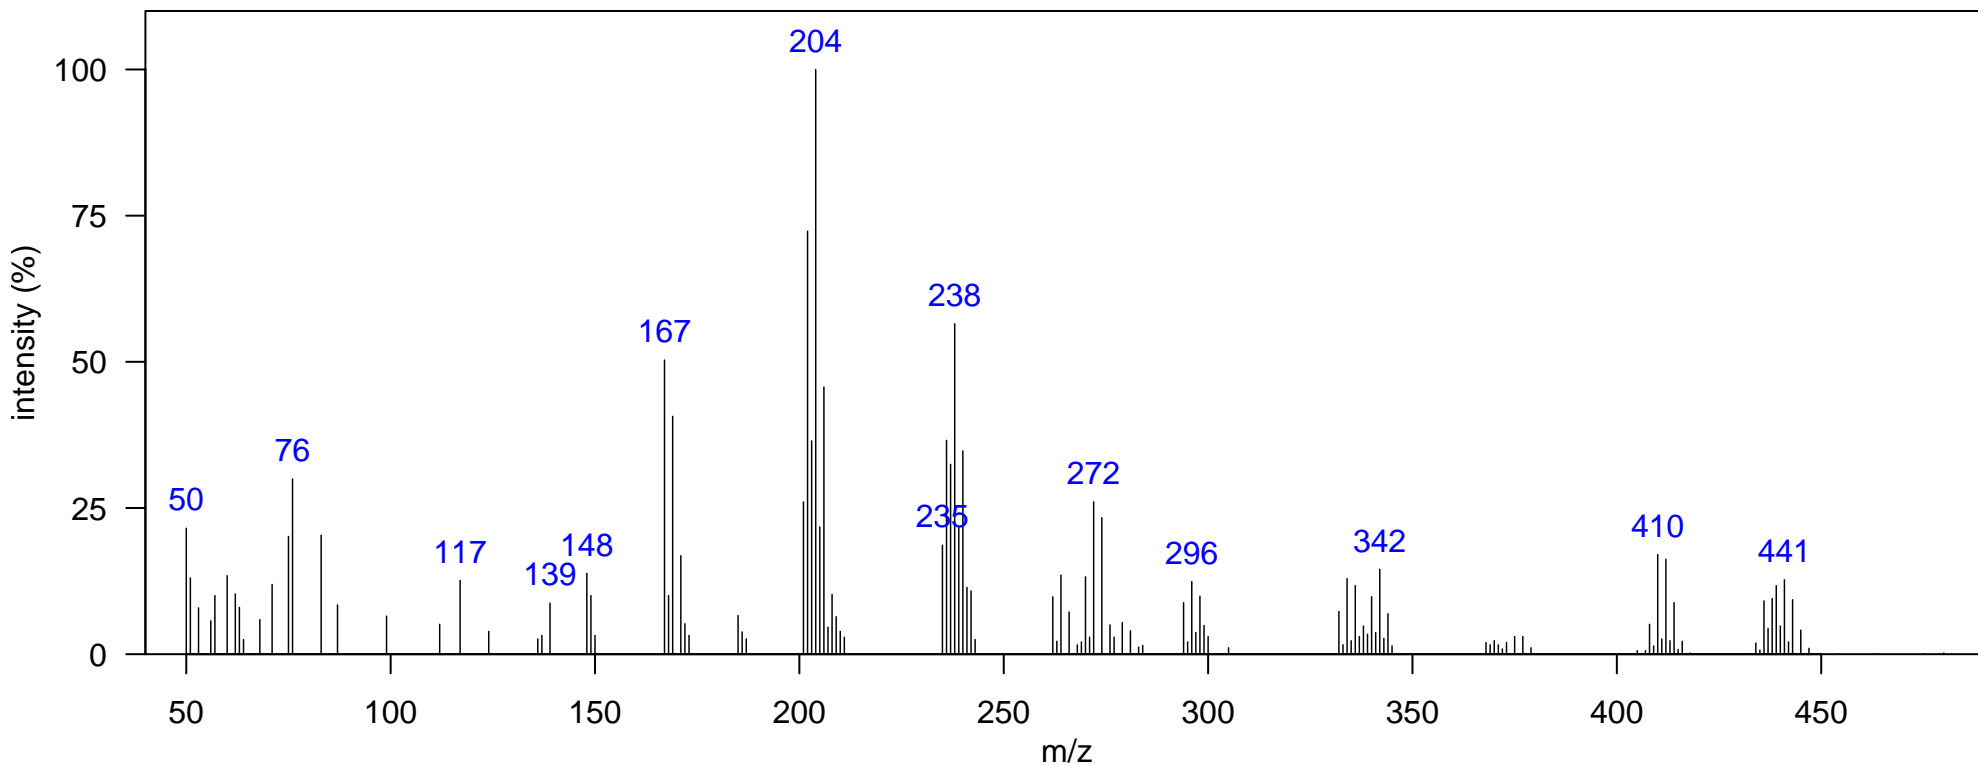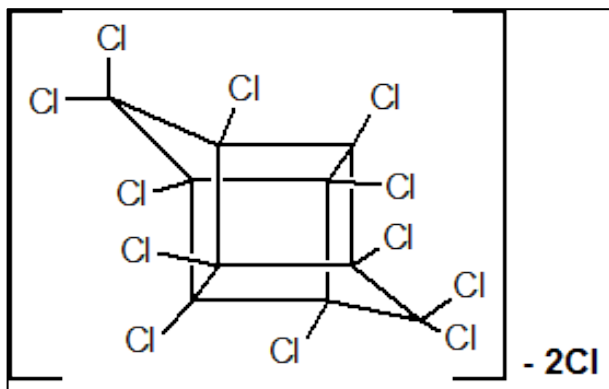

| m/z [Fragment]          |
|-------------------------|
| 437 [M-Cl] <sup>+</sup> |

Name: photomirex

Class: Mirex-related

Matrix: South Atlantic Dolphin Blubber  
In N. Atlantic: TRUE, In N. Pacific: TRUE  
Typically Monitored: FALSE  
Comment: mirex 1Cl (Pacific Library)

Instrument: GCxGC-TOF, EI, 70 eV  
1D RT, 2D RT (s): 1495.49, 1.082  
Quantitative Ion m/z: 475

Elemental Formula: C<sub>10</sub>HCl<sub>11</sub>  
Source: anthropogenic  
Identification: Authentic MS RT

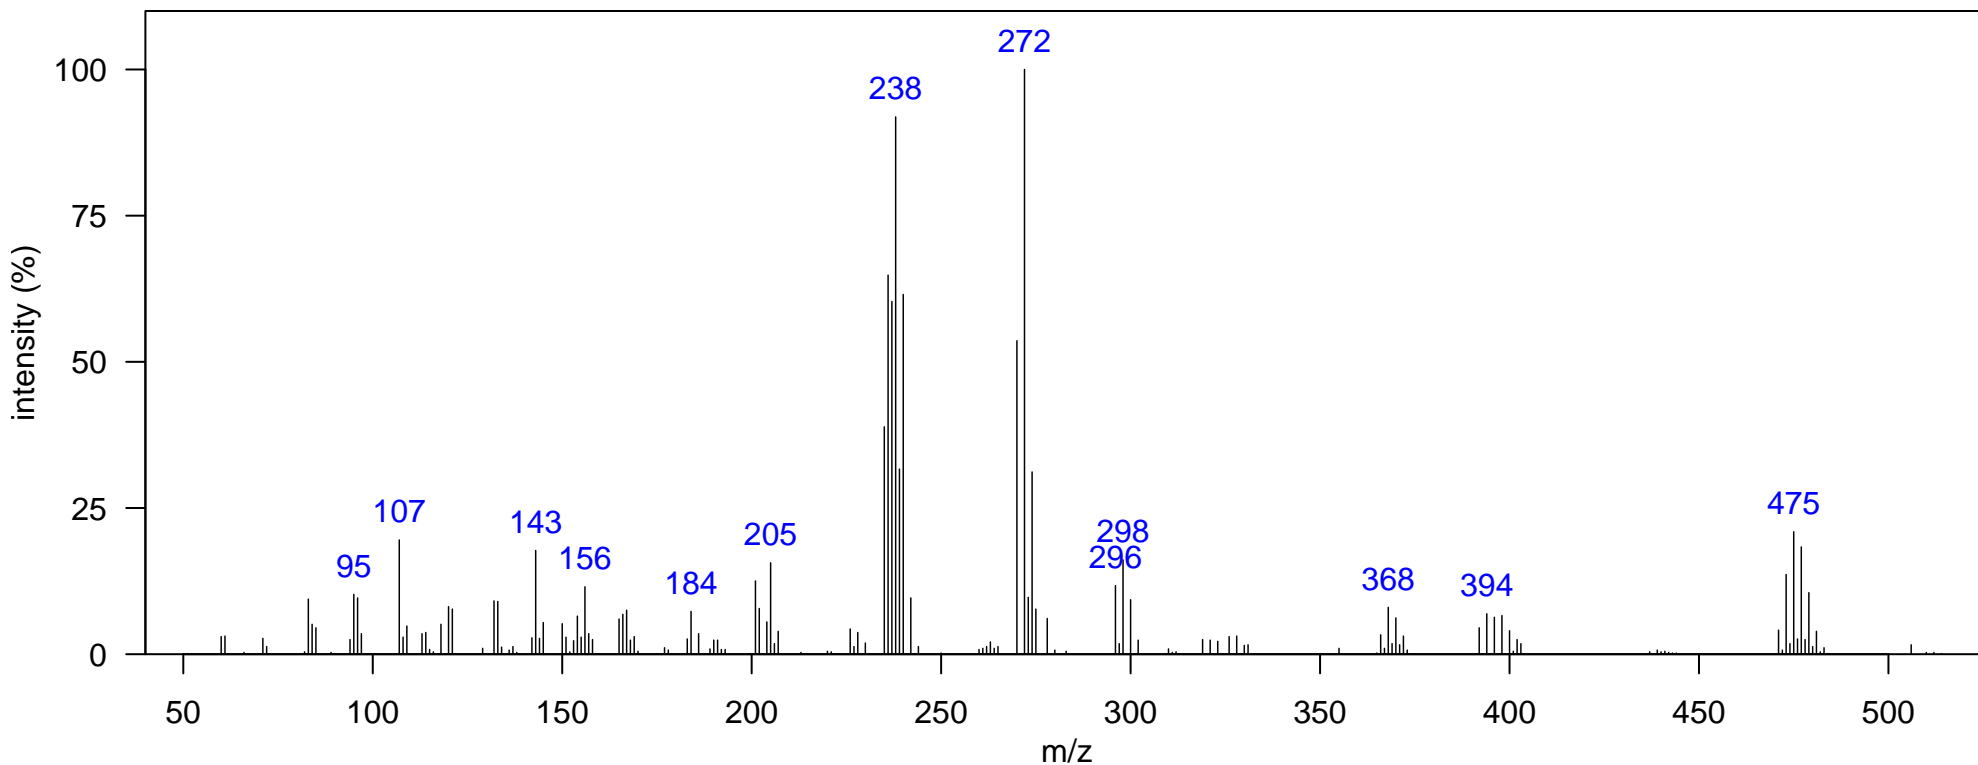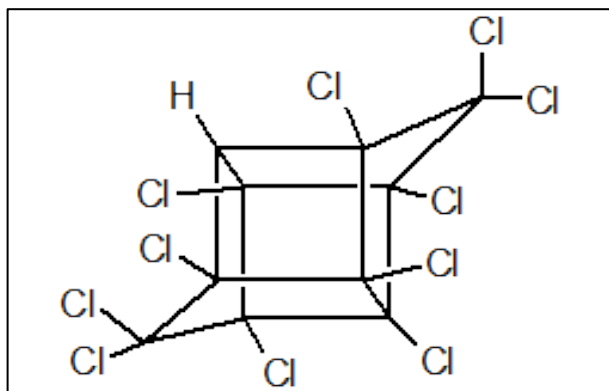

| m/z [Fragment]                                     |
|----------------------------------------------------|
| 270 [C <sub>5</sub> Cl <sub>6</sub> ] <sup>+</sup> |
| 366 [M-Cl <sub>4</sub> ]                           |
| 471 [M-Cl] <sup>+</sup>                            |

Name: mirex 1Cl 1

Class: Mirex-related

Matrix: South Atlantic Dolphin Blubber  
In N. Atlantic: TRUE, In N. Pacific: FALSE  
Typically Monitored: FALSE  
Comment:

Instrument: GCxGC-TOF, EI, 70 eV  
1D RT, 2D RT (s): 1516.48, 1.115  
Quantitative Ion m/z: 238

Elemental Formula: C<sub>10</sub>HCl<sub>11</sub>  
Source: anthropogenic  
Identification: Manual-Congener Group

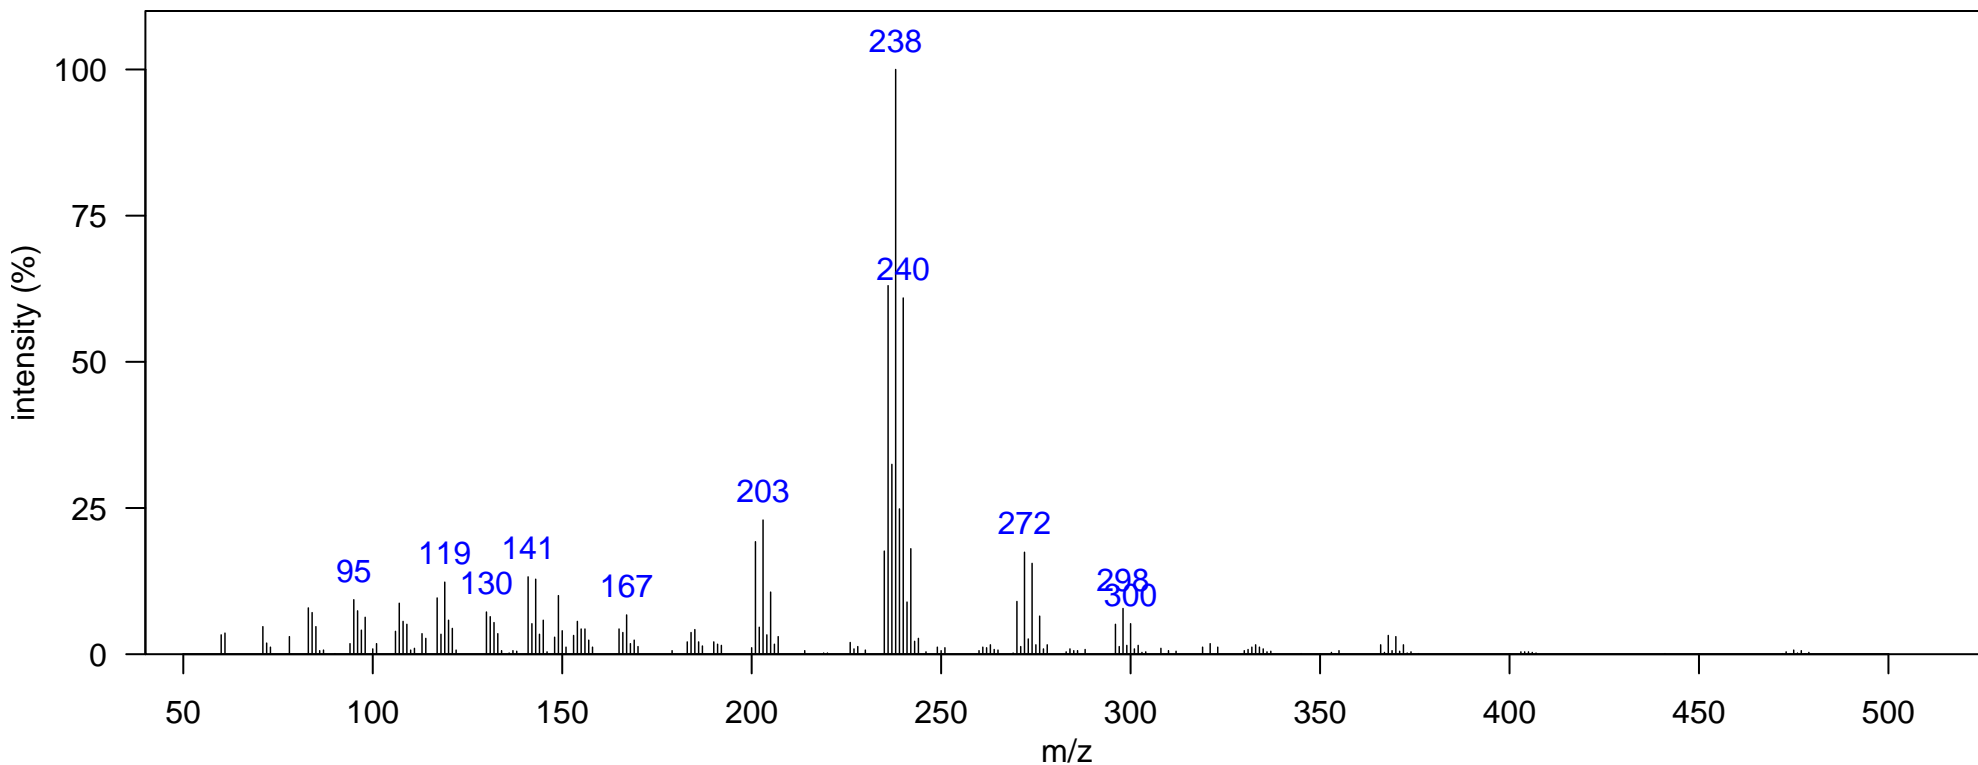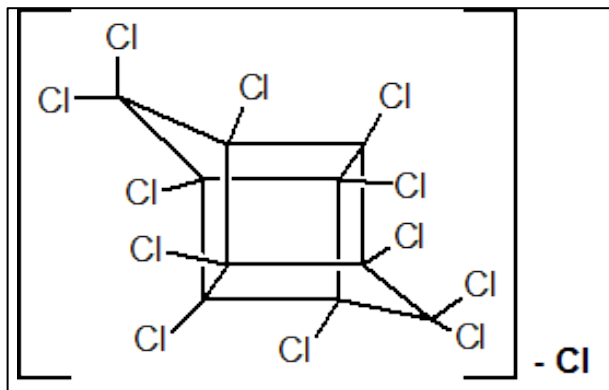

| m/z [Fragment]                                     |
|----------------------------------------------------|
| 270 [C <sub>5</sub> Cl <sub>6</sub> ] <sup>+</sup> |
| 366 [M-Cl <sub>4</sub> ]                           |
| 471 [M-Cl] <sup>+</sup>                            |

Name: mirex

Class: Mirex-related

Matrix: South Atlantic Dolphin Blubber  
In N. Atlantic: TRUE, In N. Pacific: TRUE  
Typically Monitored: TRUE  
Comment:

Instrument: GCxGC-TOF, EI, 70 eV  
1D RT, 2D RT (s): 1572.44, 1.247  
Quantitative Ion m/z: 272

Elemental Formula: C<sub>10</sub>Cl<sub>12</sub>  
Source: anthropogenic  
Identification: Authentic MS RT

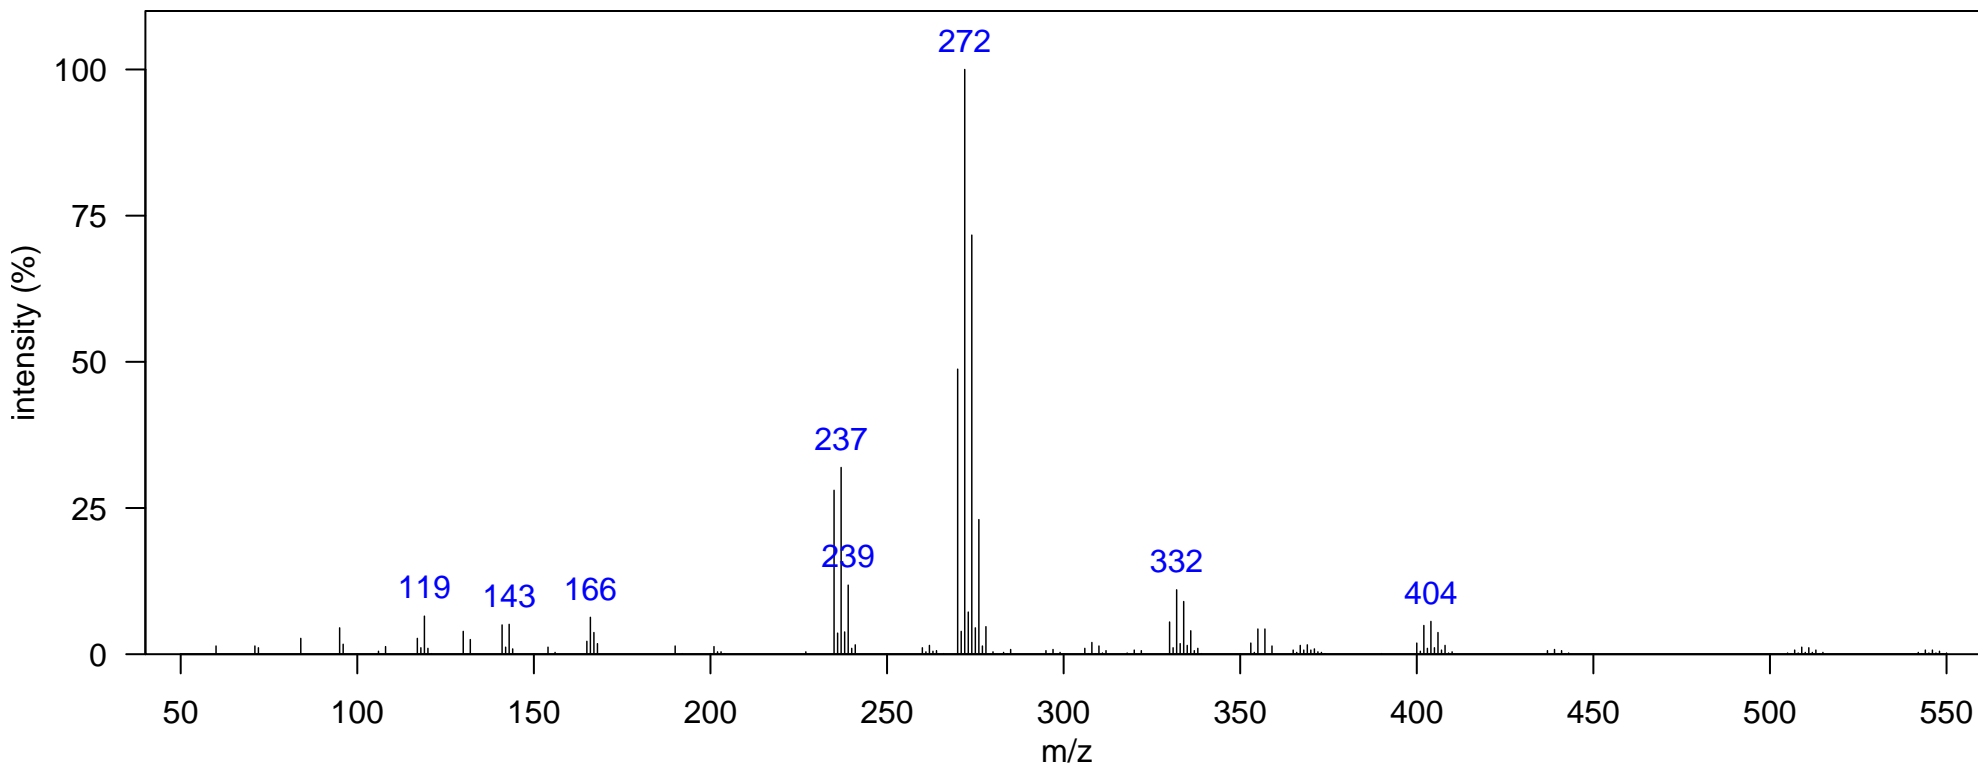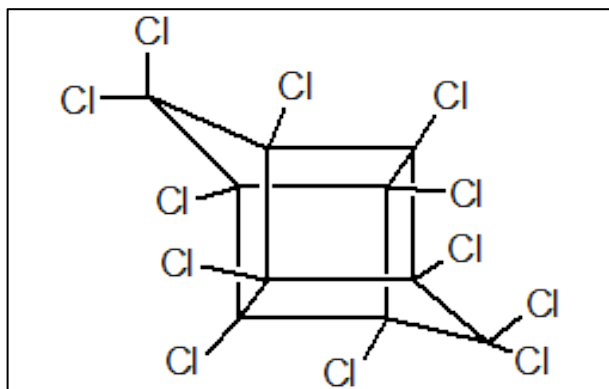

| m/z [Fragment]          |
|-------------------------|
| 505 [M-Cl] <sup>+</sup> |
| 540 M <sup>+</sup>      |



Name: dechlorane 602

Class: Mirex-related

Matrix: South Atlantic Dolphin Blubber  
In N. Atlantic: FALSE, In N. Pacific: FALSE  
Typically Monitored: FALSE  
Comment:

Instrument: GCxGC-TOF, EI, 70 eV  
1D RT, 2D RT (s): 1673.89, 1.379  
Quantitative Ion m/z: 513

Elemental Formula: C<sub>14</sub>H<sub>4</sub>Cl<sub>12</sub>O  
Source: anthropogenic  
Identification: Authentic MS RT

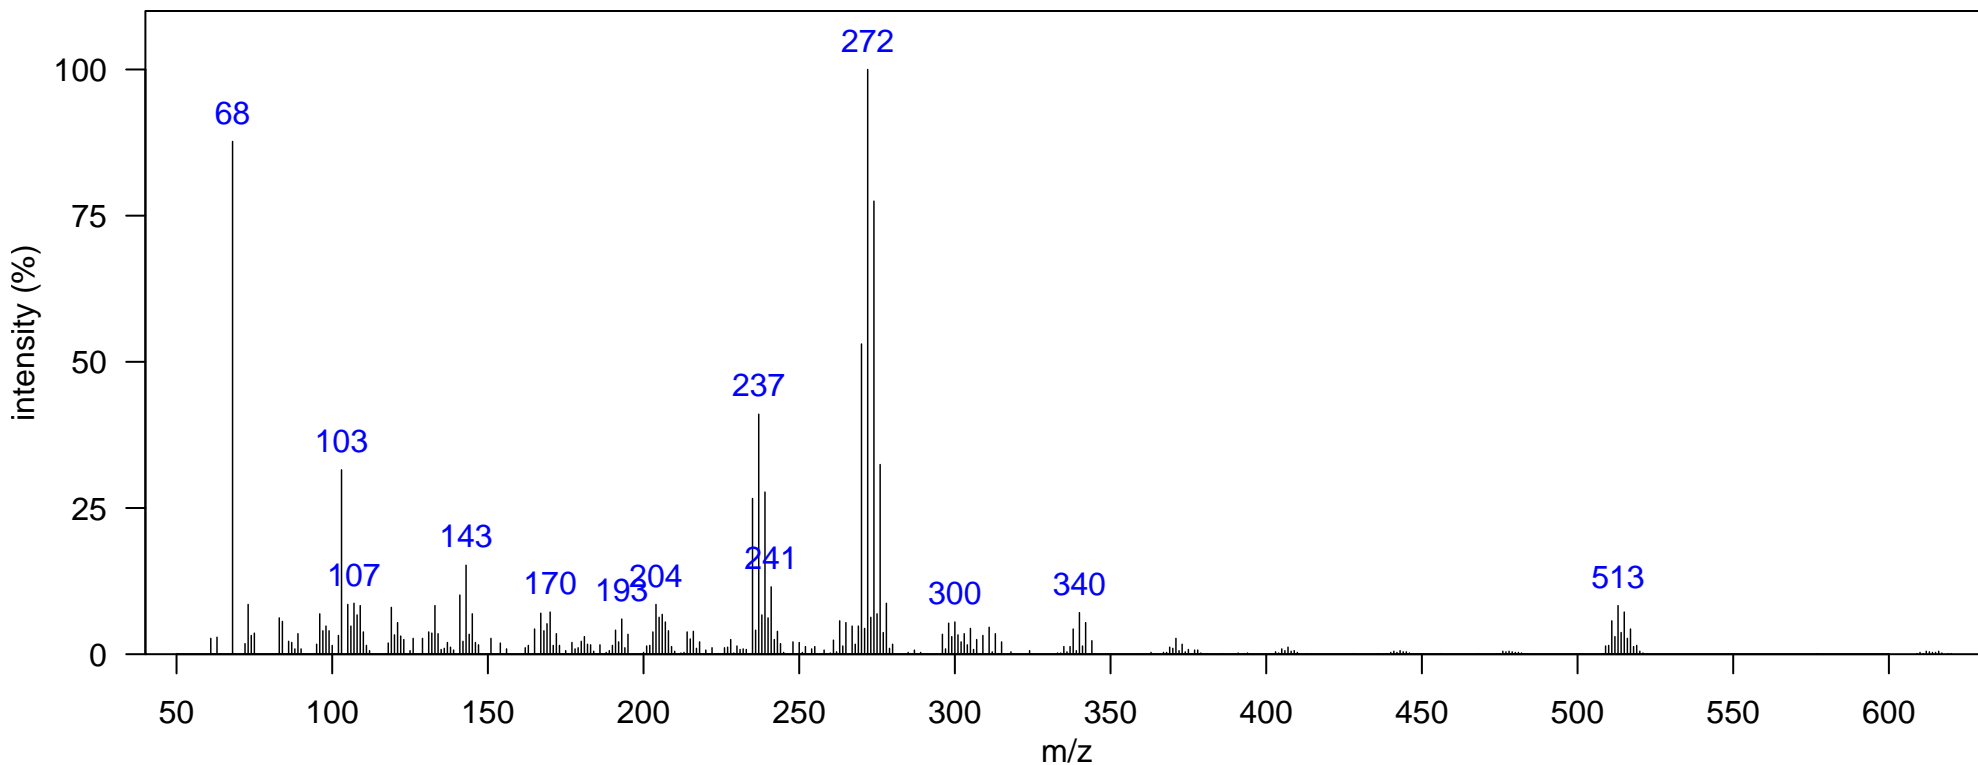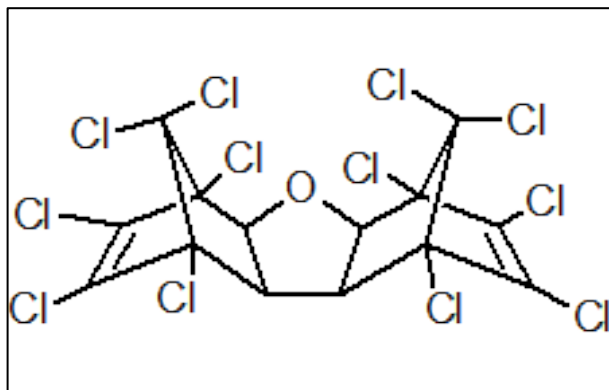

| m/z [Fragment]                                     |
|----------------------------------------------------|
| 270 [C <sub>5</sub> Cl <sub>6</sub> ] <sup>+</sup> |
| 608 M <sup>+</sup>                                 |

Name: mirex related

Class: Mirex-related

Matrix: South Atlantic Dolphin Blubber  
In N. Atlantic: FALSE, In N. Pacific: TRUE  
Typically Monitored: FALSE  
Comment: mirex related 1 (Pacific Library)

Instrument: GCxGC-TOF, EI, 70 eV  
1D RT, 2D RT (s): 1701.87, 1.459  
Quantitative Ion m/z: 272

Elemental Formula:  
Source: anthropogenic  
Identification: Manual

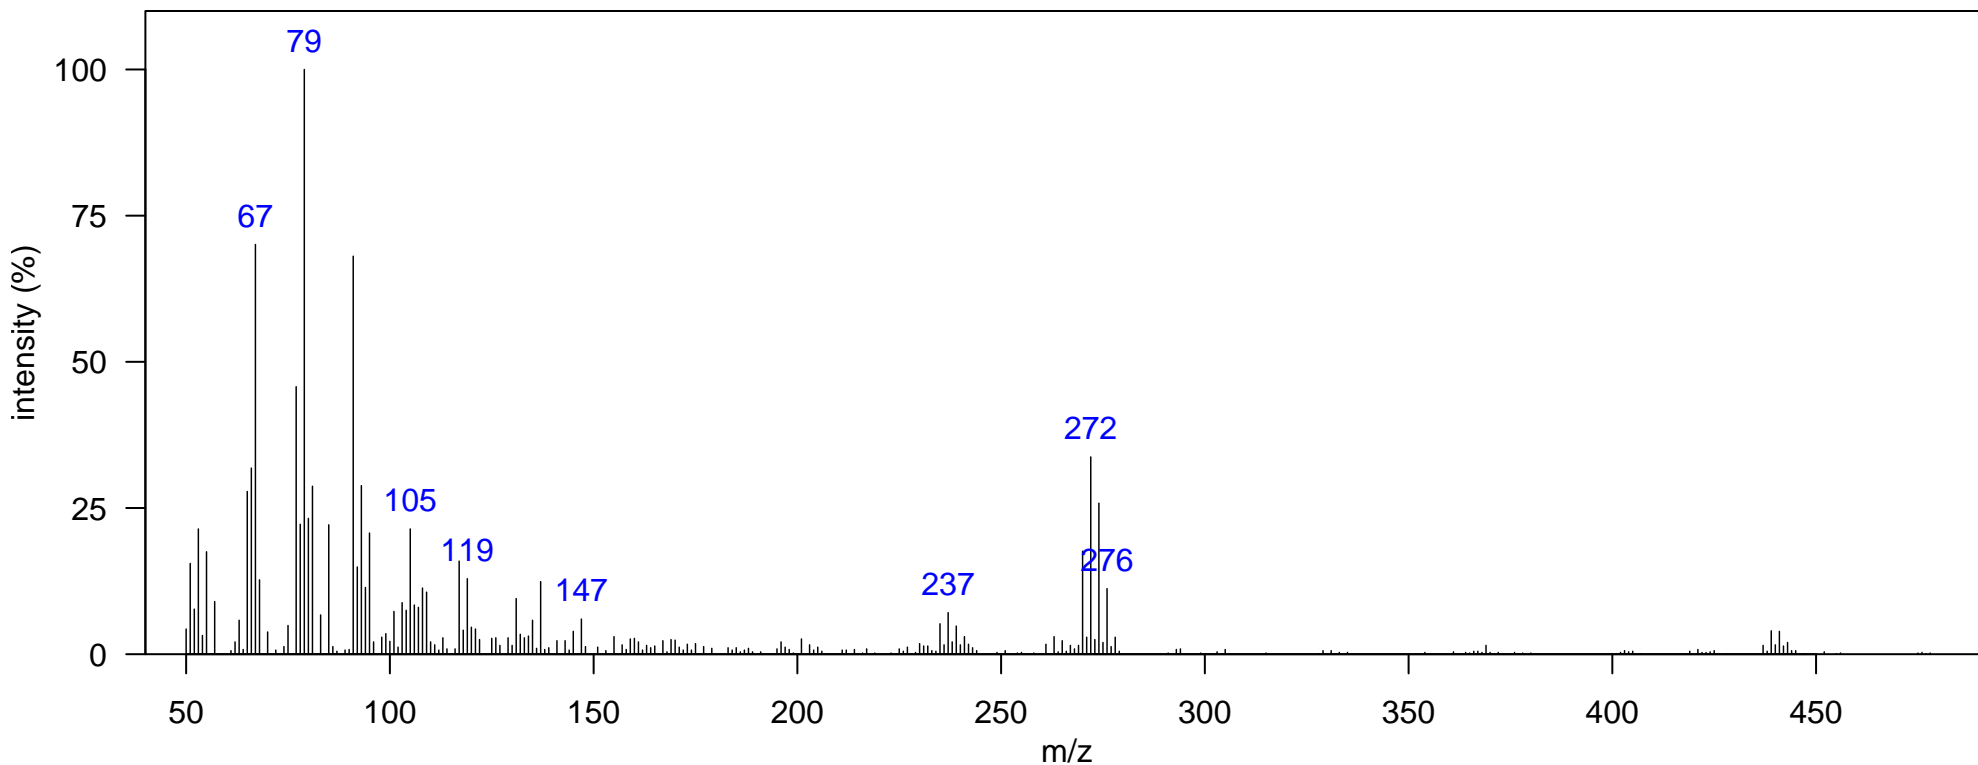

| m/z [Fragment] |
|----------------|
| 270 [C5Cl6]+   |
| 437 [Frag]+    |

Name: BDE-28/33

Class: PBDE

Matrix: South Atlantic Dolphin Blubber  
In N. Atlantic: TRUE, In N. Pacific: TRUE  
Typically Monitored: TRUE  
Comment:

Instrument: GCxGC-TOF, EI, 70 eV  
1D RT, 2D RT (s): 1404.54, 1.049  
Quantitative Ion m/z: 406

Elemental Formula: C<sub>12</sub>H<sub>7</sub>Br<sub>3</sub>O  
Source: anthropogenic  
Identification: Authentic MS RT

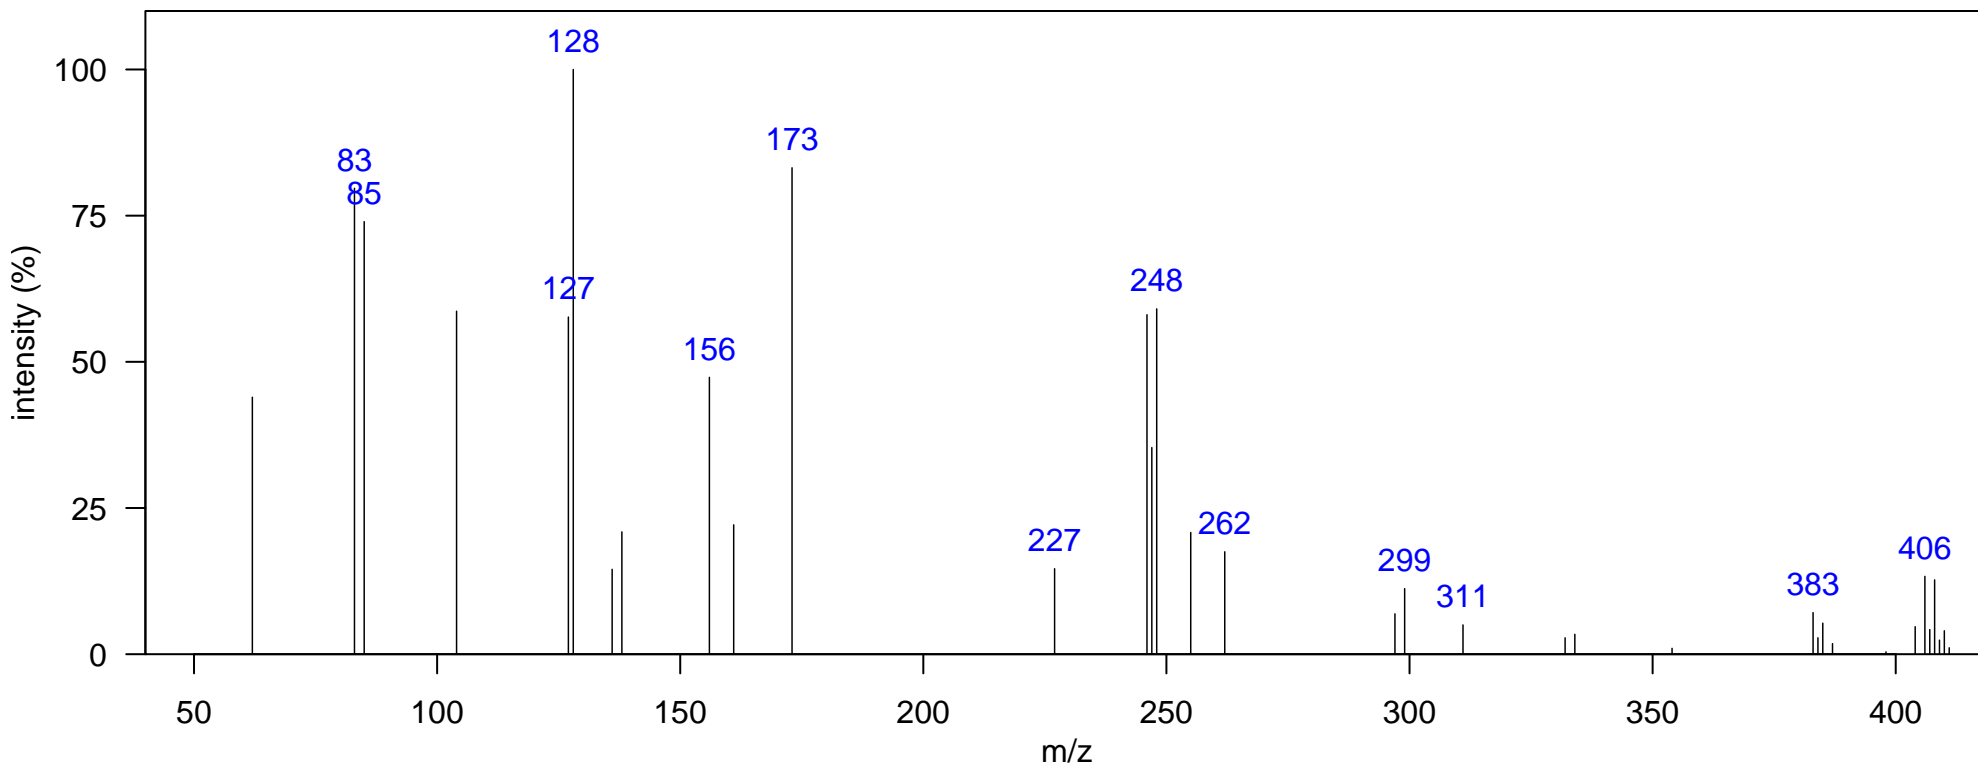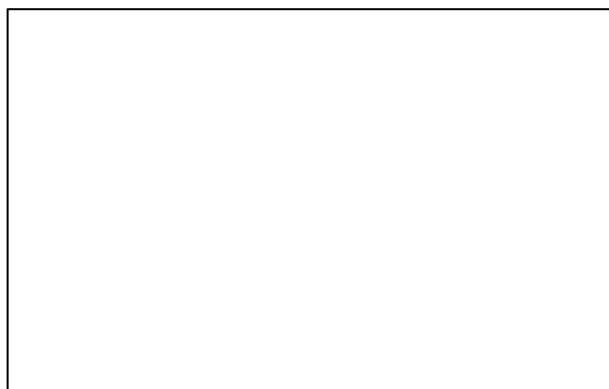

| m/z [Fragment]                        |
|---------------------------------------|
| 246 [M-Br <sub>2</sub> ] <sup>+</sup> |
| 404 M <sup>+</sup>                    |

Name: BDE-47

Class: PBDE

Matrix: South Atlantic Dolphin Blubber  
In N. Atlantic: TRUE, In N. Pacific: TRUE  
Typically Monitored: TRUE  
Comment:

Instrument: GCxGC-TOF, EI, 70 eV  
1D RT, 2D RT (s): 1530.47, 1.188  
Quantitative Ion m/z: 486

Elemental Formula: C<sub>12</sub>H<sub>6</sub>Br<sub>4</sub>O  
Source: anthropogenic  
Identification: Authentic MS RT

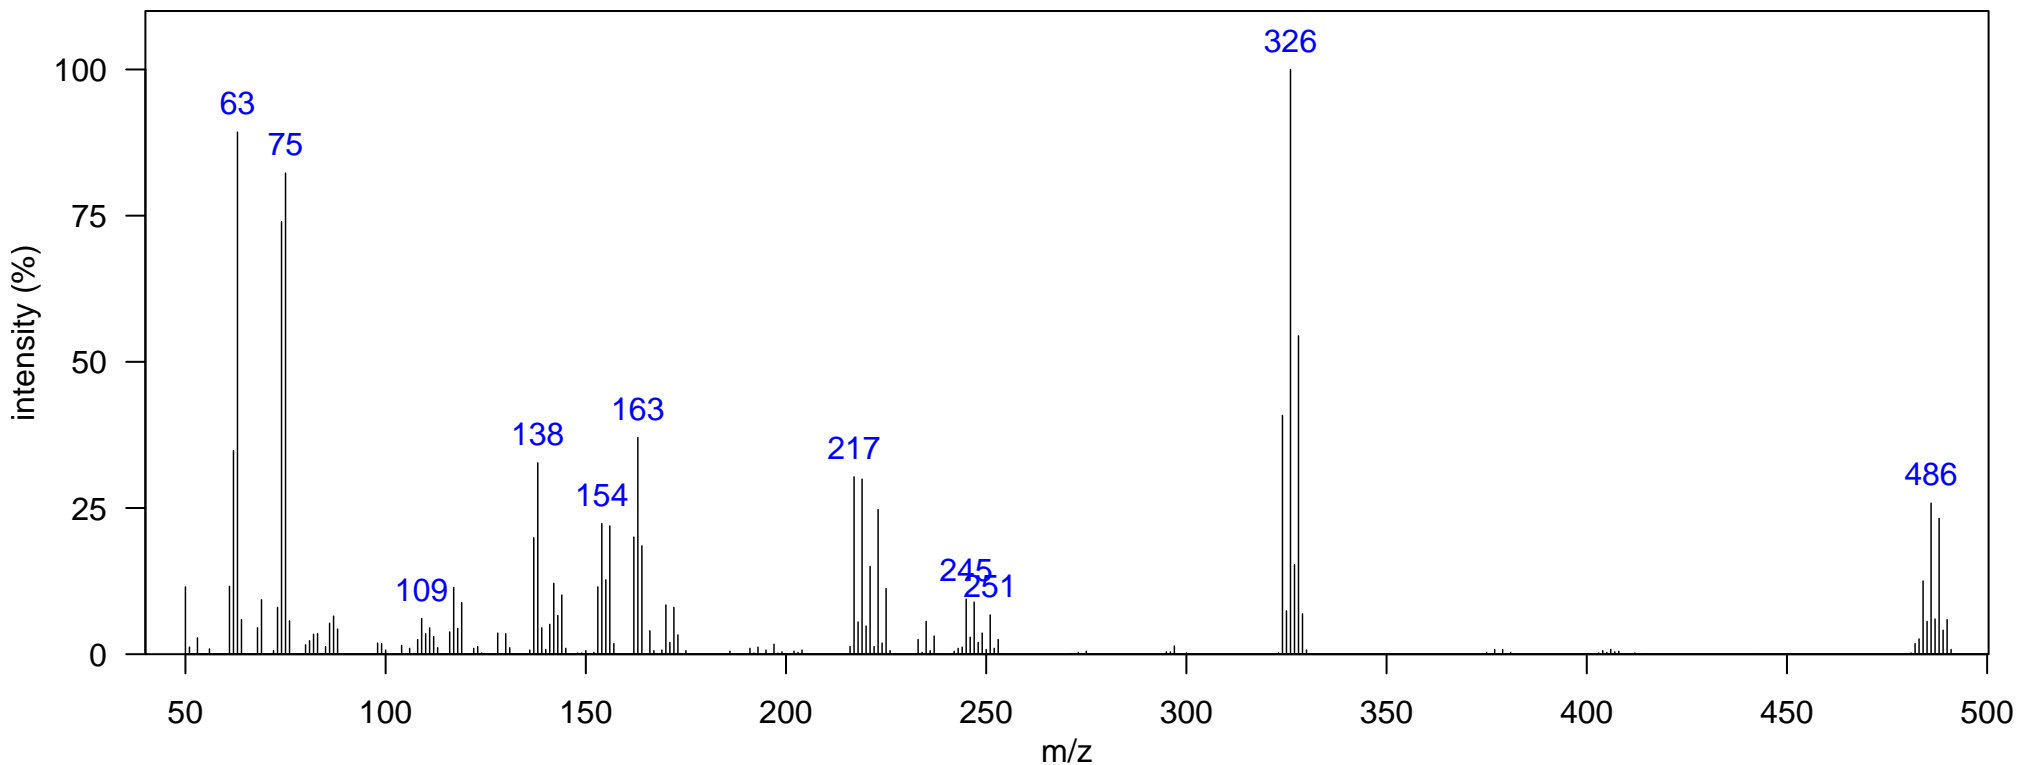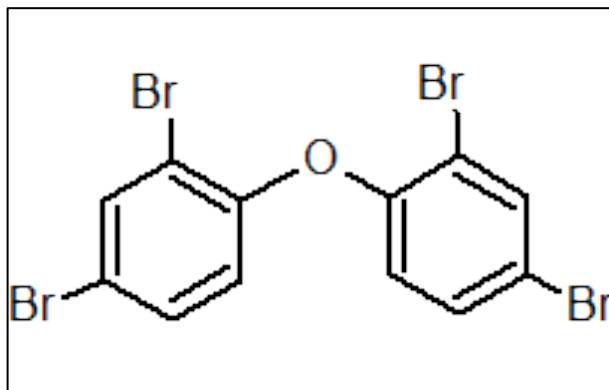

| m/z [Fragment]                        |
|---------------------------------------|
| 324 [M-Br <sub>2</sub> ] <sup>+</sup> |
| 482 M <sup>+</sup>                    |

Name: BDE 5Br 1

Class: PBDE

Matrix: South Atlantic Dolphin Blubber  
In N. Atlantic: TRUE, In N. Pacific: TRUE  
Typically Monitored: FALSE  
Comment:

Instrument: GCxGC-TOF, EI, 70 eV  
1D RT, 2D RT (s): 1593.43, 1.34  
Quantitative Ion m/z: 564

Elemental Formula: C<sub>12</sub>H<sub>5</sub>Br<sub>5</sub>O  
Source: anthropogenic  
Identification: Authentic MS RT

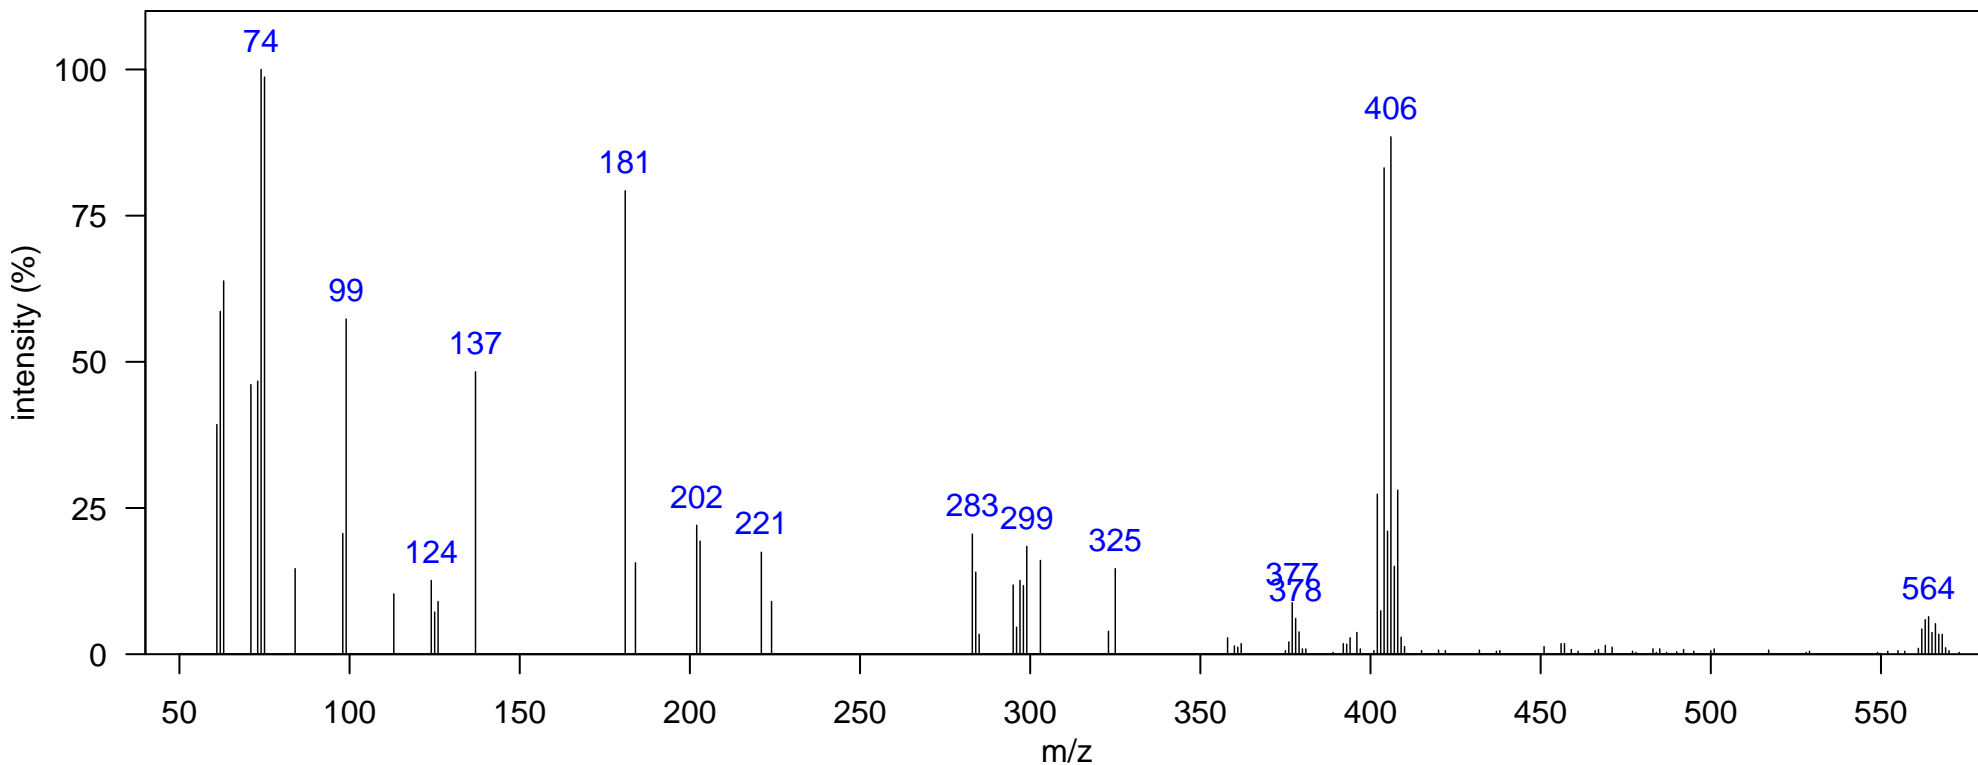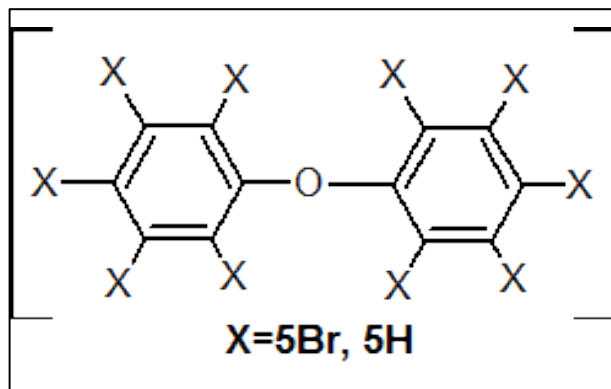

| m/z [Fragment]                        |
|---------------------------------------|
| 402 [M-Br <sub>2</sub> ] <sup>+</sup> |
| 560 M <sup>+</sup>                    |

Name: BDE-100

Class: PBDE

Matrix: South Atlantic Dolphin Blubber  
In N. Atlantic: TRUE, In N. Pacific: TRUE  
Typically Monitored: TRUE  
Comment:

Instrument: GCxGC-TOF, EI, 70 eV  
1D RT, 2D RT (s): 1638.91, 1.558  
Quantitative Ion m/z: 564

Elemental Formula: C<sub>12</sub>H<sub>5</sub>Br<sub>5</sub>O  
Source: anthropogenic  
Identification: Authentic MS RT

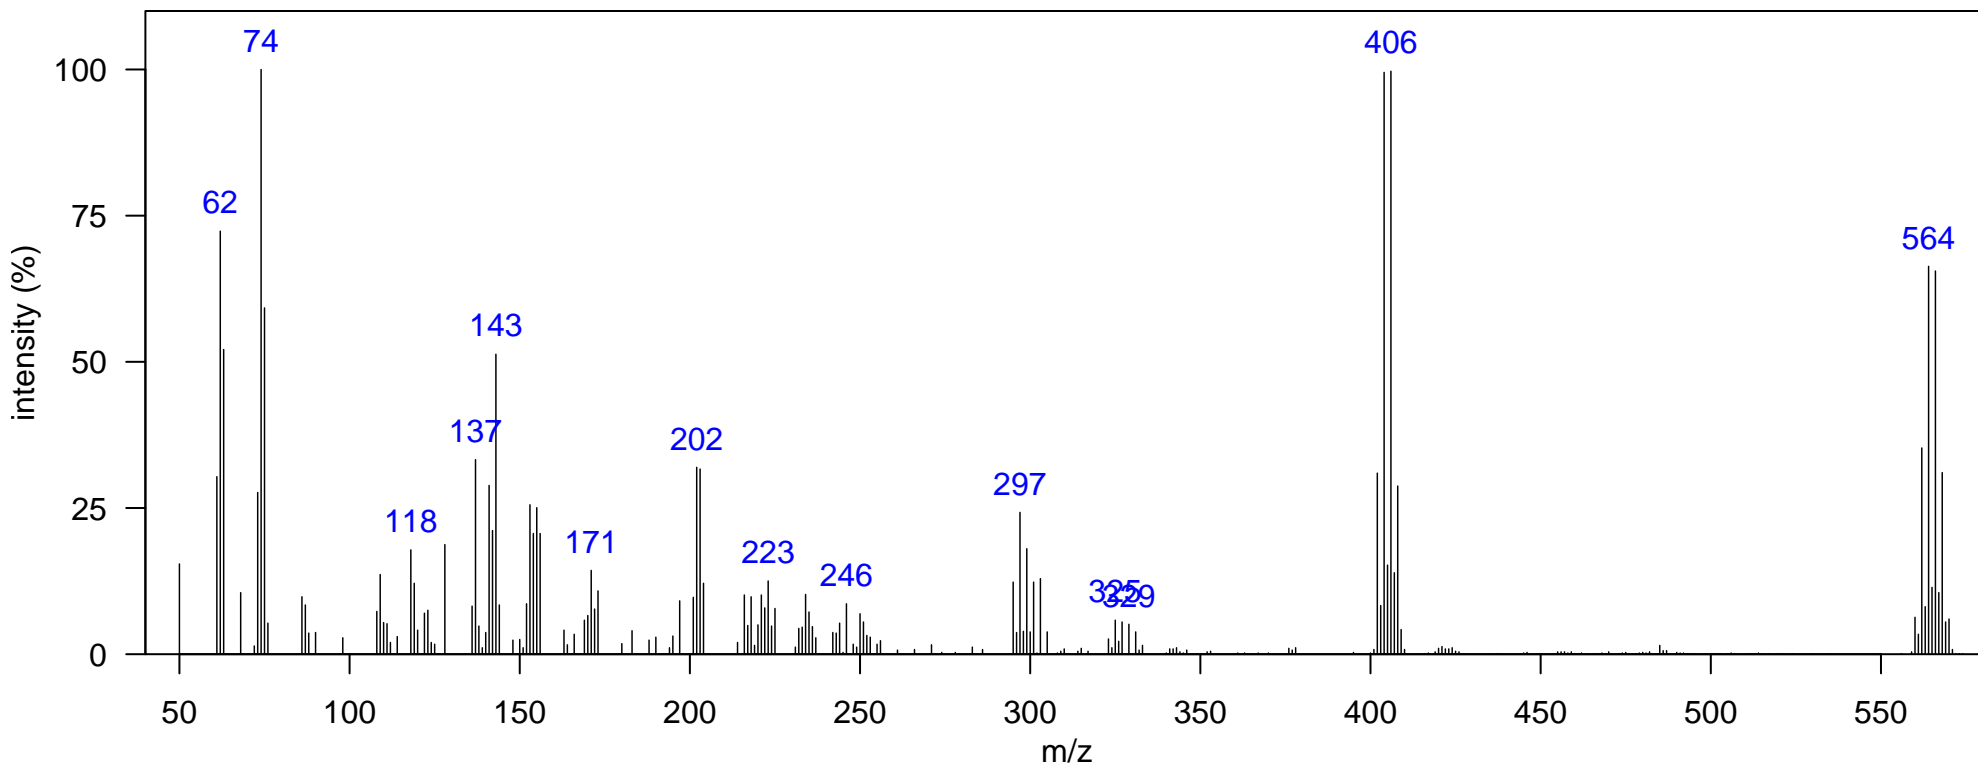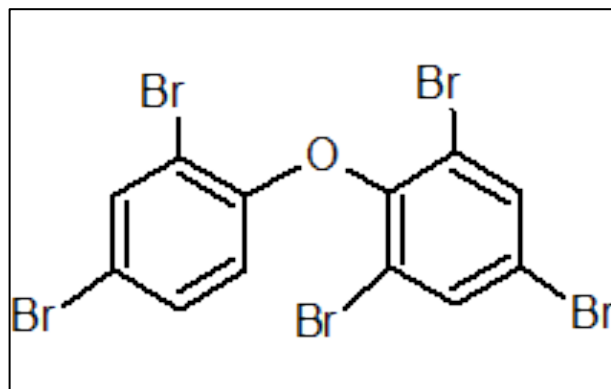

| m/z [Fragment]                        |
|---------------------------------------|
| 402 [M-Br <sub>2</sub> ] <sup>+</sup> |
| 560 M <sup>+</sup>                    |

Name: BDE-99

Class: PBDE

Matrix: South Atlantic Dolphin Blubber  
In N. Atlantic: TRUE, In N. Pacific: TRUE  
Typically Monitored: TRUE  
Comment:

Instrument: GCxGC-TOF, EI, 70 eV  
1D RT, 2D RT (s): 1670.39, 1.61  
Quantitative Ion m/z: 564

Elemental Formula: C<sub>12</sub>H<sub>5</sub>Br<sub>5</sub>O  
Source: anthropogenic  
Identification: Authentic MS RT

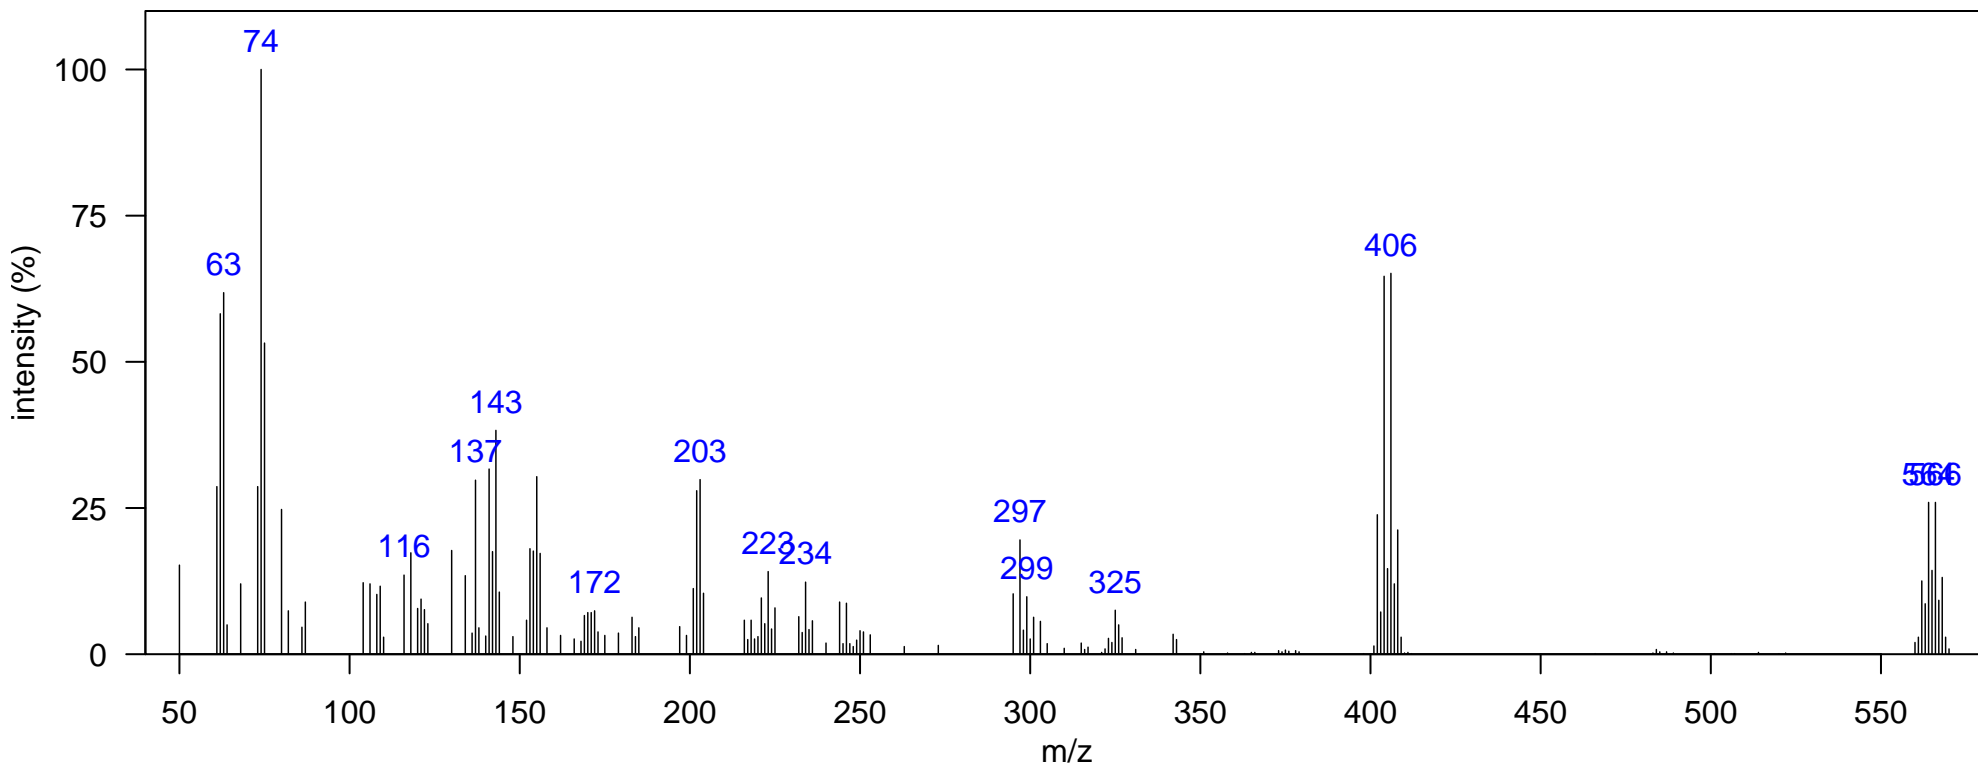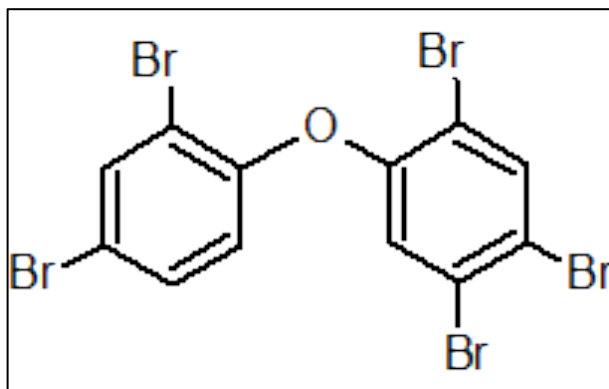

| m/z [Fragment]                        |
|---------------------------------------|
| 402 [M-Br <sub>2</sub> ] <sup>+</sup> |
| 560 M <sup>+</sup>                    |

Name: BDE 5Br 2

Class: PBDE

Matrix: South Atlantic Dolphin Blubber  
In N. Atlantic: FALSE, In N. Pacific: FALSE  
Typically Monitored: FALSE  
Comment:

Instrument: GCxGC-TOF, EI, 70 eV  
1D RT, 2D RT (s): 1680.88, 1.65  
Quantitative Ion m/z: 564

Elemental Formula: C<sub>12</sub>H<sub>5</sub>Br<sub>5</sub>O  
Source: anthropogenic  
Identification: Manual-Congener Group

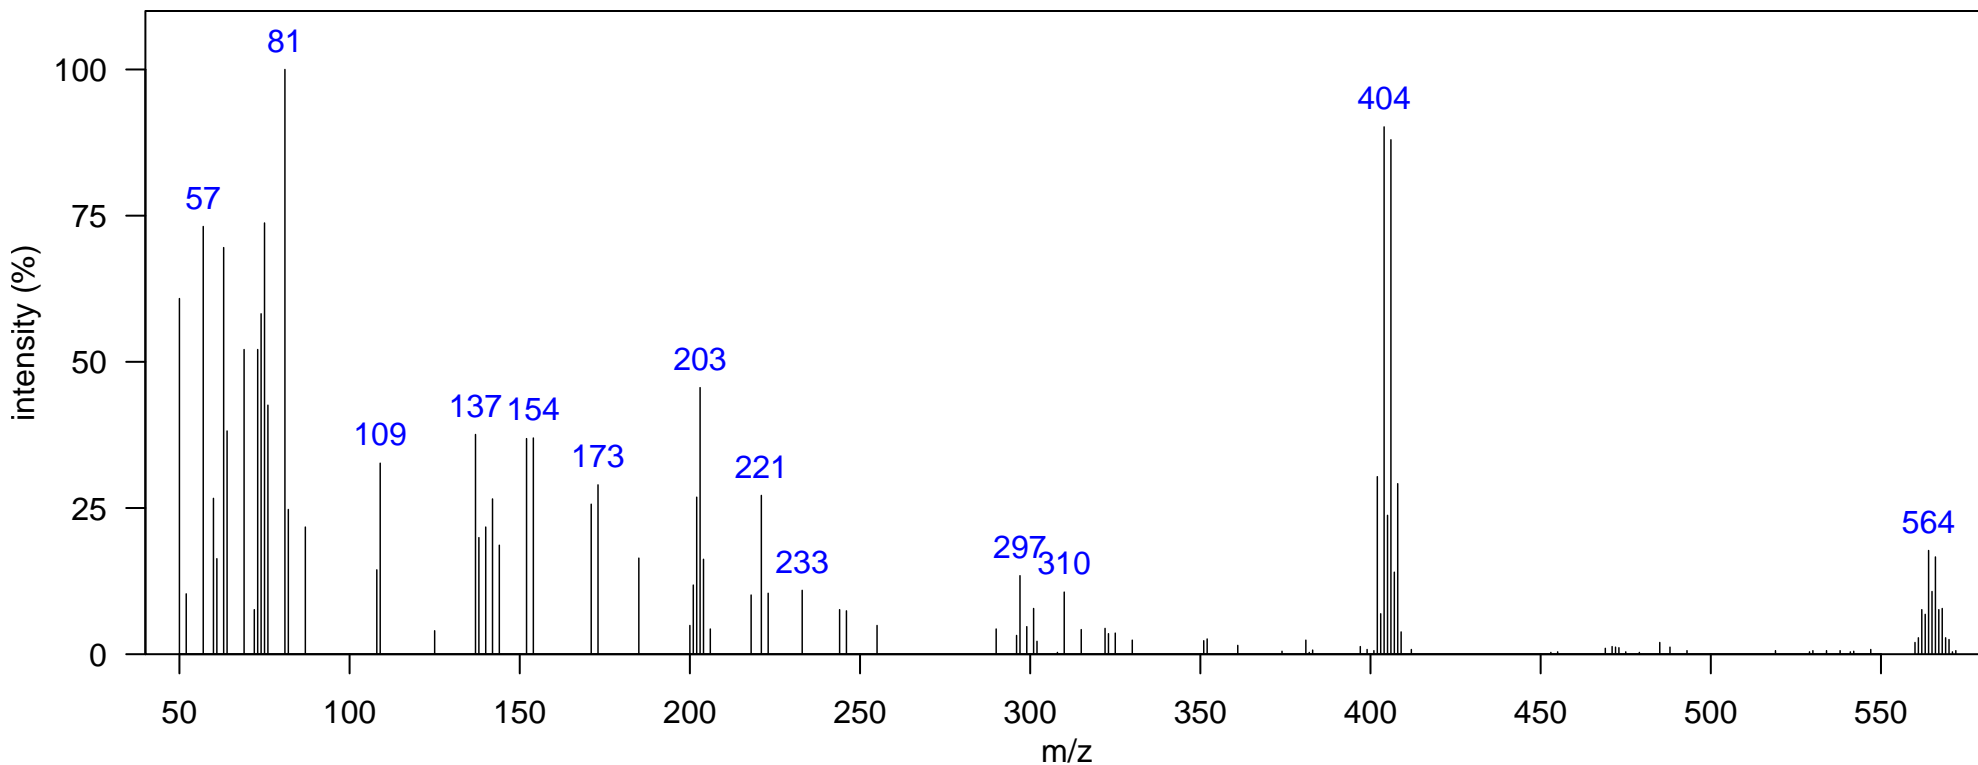

| m/z [Fragment]                        |
|---------------------------------------|
| 402 [M-Br <sub>2</sub> ] <sup>+</sup> |
| 560 M <sup>+</sup>                    |



Name: BDE 5Br 3

Class: PBDE

Matrix: South Atlantic Dolphin Blubber  
In N. Atlantic: FALSE, In N. Pacific: FALSE  
Typically Monitored: FALSE  
Comment:

Instrument: GCxGC-TOF, EI, 70 eV  
1D RT, 2D RT (s): 1691.38, 1.65  
Quantitative Ion m/z: 564

Elemental Formula: C<sub>12</sub>H<sub>5</sub>Br<sub>5</sub>O  
Source: anthropogenic  
Identification: Manual-Congener Group

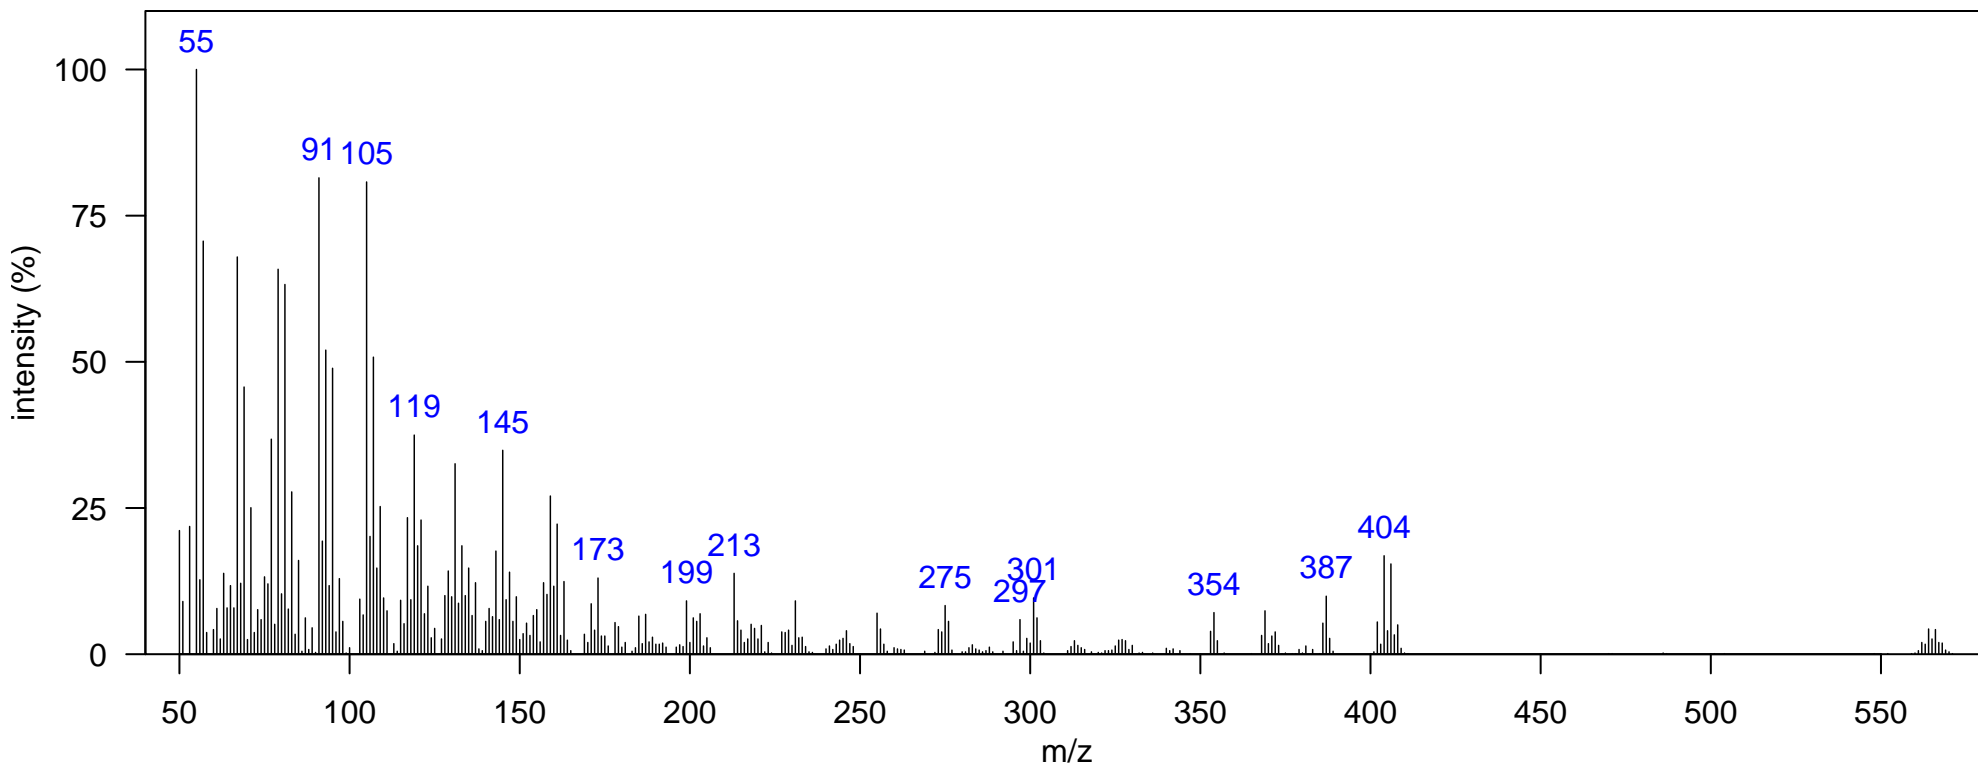

| m/z [Fragment]                        |
|---------------------------------------|
| 402 [M-Br <sub>2</sub> ] <sup>+</sup> |
| 560 M <sup>+</sup>                    |

Name: BDE 5Br 4

Class: PBDE

Matrix: South Atlantic Dolphin Blubber  
In N. Atlantic: FALSE, In N. Pacific: FALSE  
Typically Monitored: FALSE  
Comment:

Instrument: GCxGC-TOF, EI, 70 eV  
1D RT, 2D RT (s): 1743.85, 1.551  
Quantitative Ion m/z: 564

Elemental Formula: C<sub>12</sub>H<sub>5</sub>Br<sub>5</sub>O  
Source: anthropogenic  
Identification: Manual-Congener Group

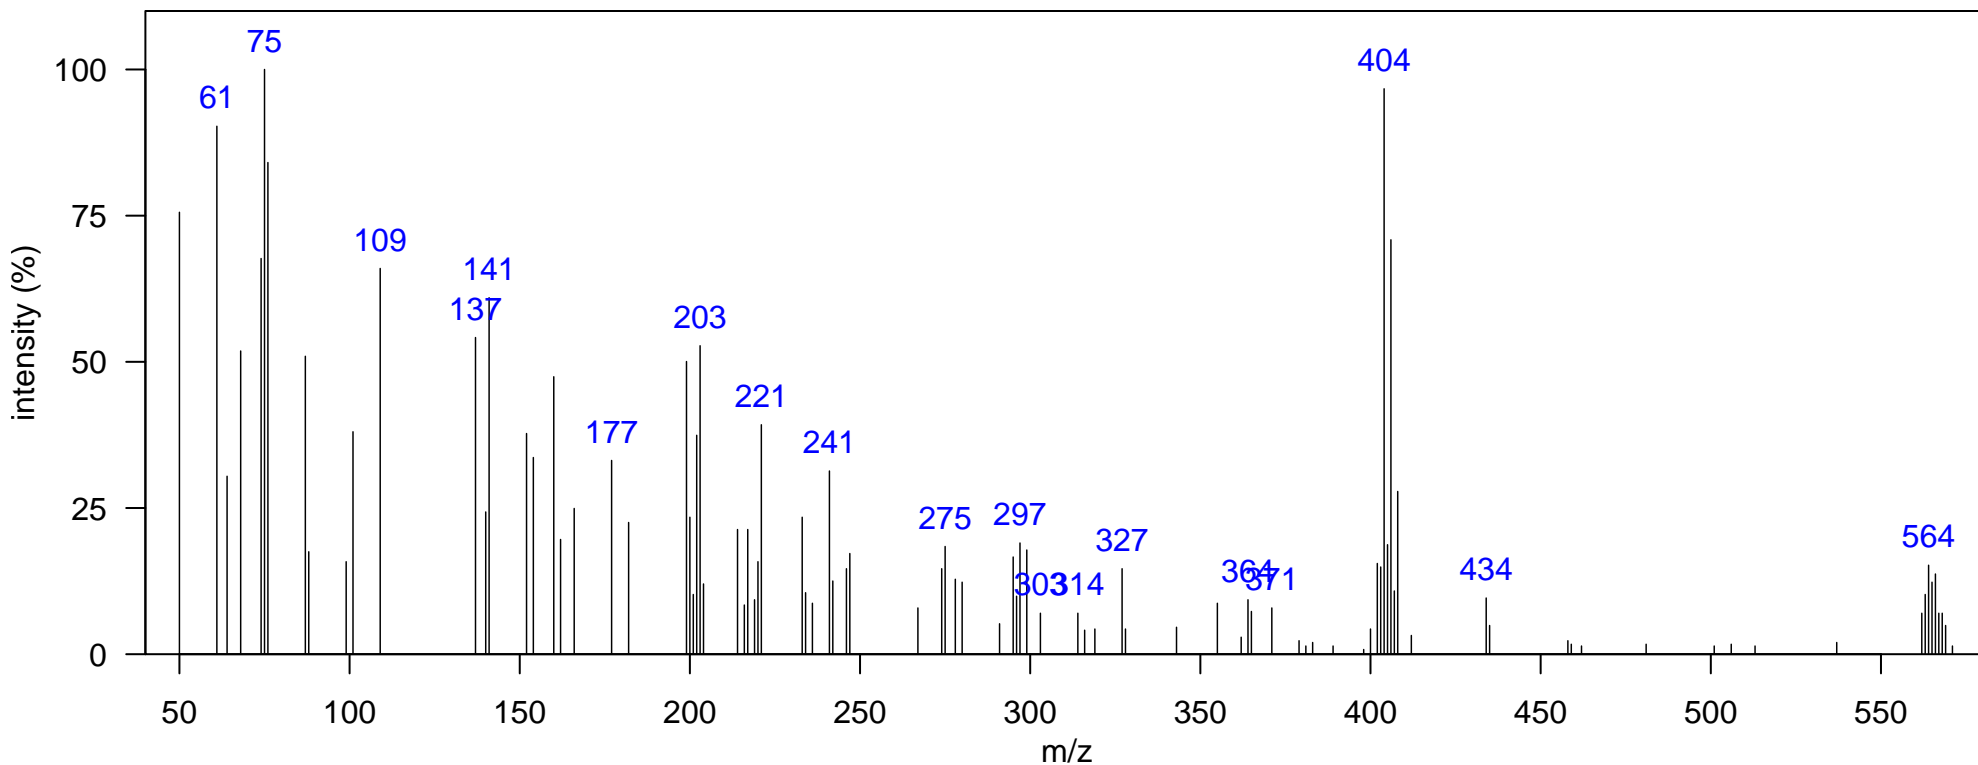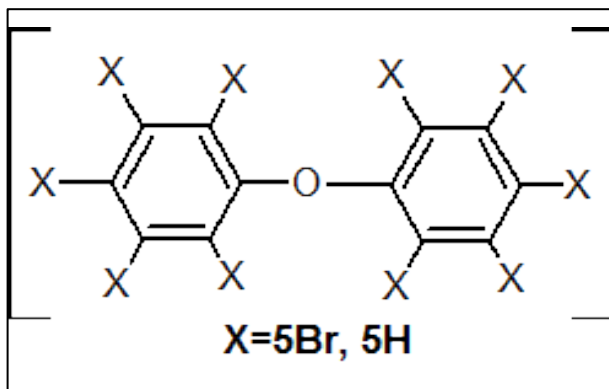

| m/z [Fragment]                        |
|---------------------------------------|
| 402 [M-Br <sub>2</sub> ] <sup>+</sup> |
| 560 M <sup>+</sup>                    |

Name: BDE-155

Class: PBDE

Matrix: South Atlantic Dolphin Blubber  
In N. Atlantic: TRUE, In N. Pacific: TRUE  
Typically Monitored: TRUE  
Comment:

Instrument: GCxGC-TOF, EI, 70 eV  
1D RT, 2D RT (s): 1750.84, 1.564  
Quantitative Ion m/z: 644

Elemental Formula: C<sub>12</sub>H<sub>4</sub>Br<sub>6</sub>O  
Source: anthropogenic  
Identification: Authentic MS RT

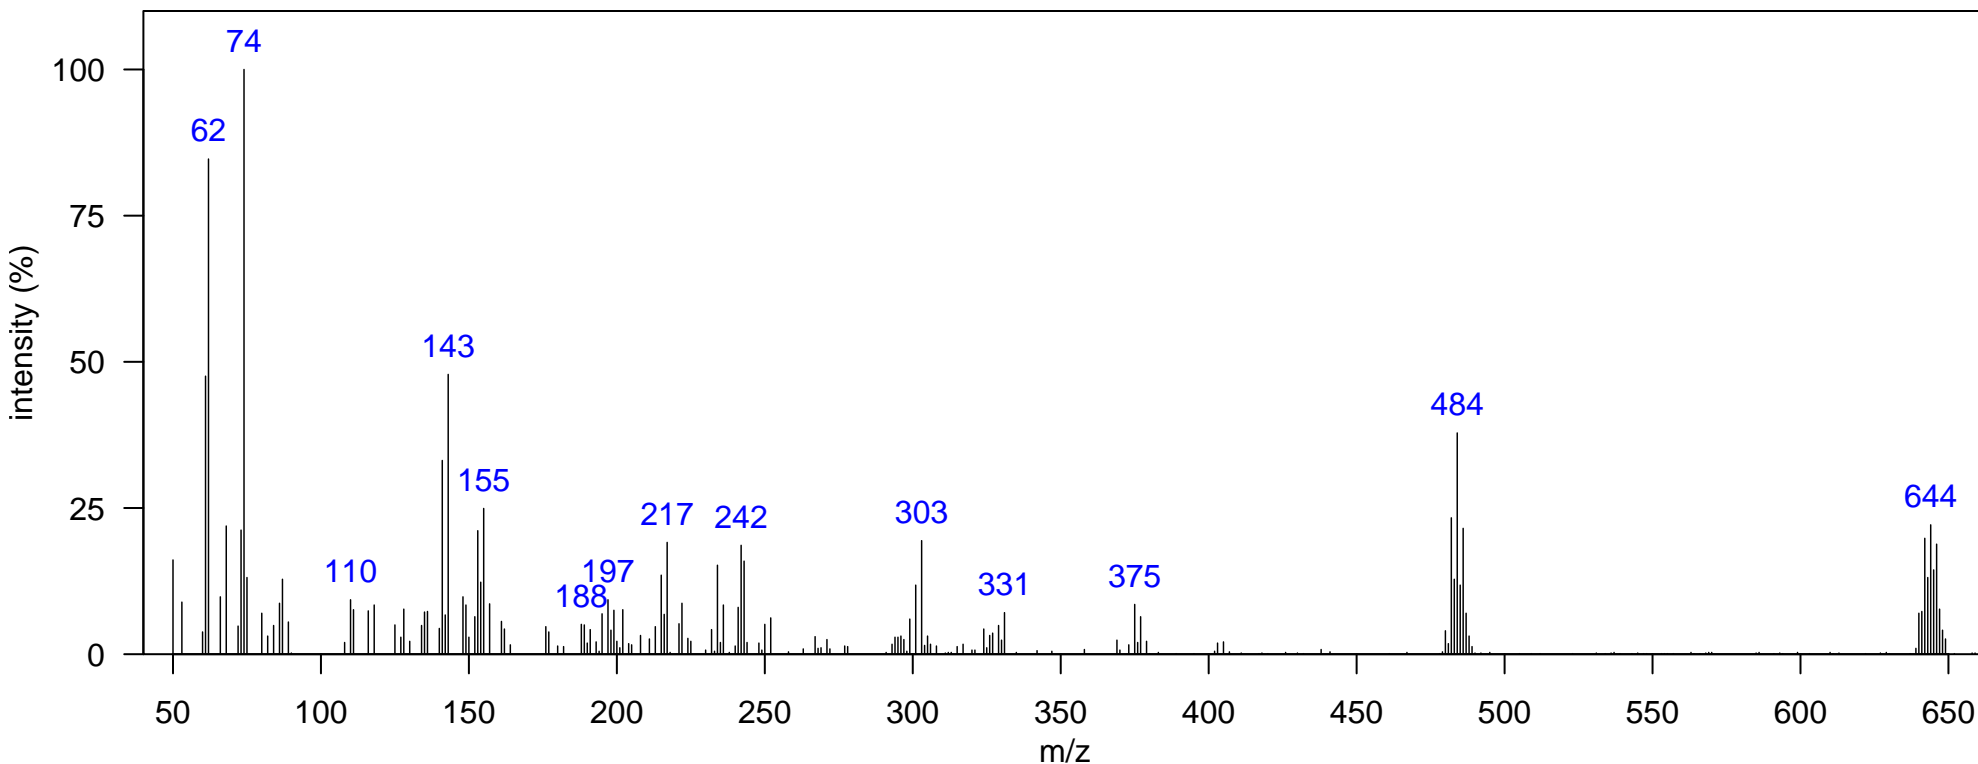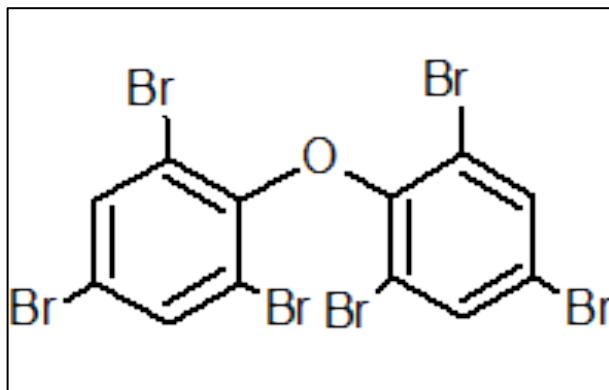

| m/z [Fragment]                        |
|---------------------------------------|
| 480 [M-Br <sub>2</sub> ] <sup>+</sup> |
| 638 M <sup>+</sup>                    |

Name: BDE-154

Class: PBDE

Matrix: South Atlantic Dolphin Blubber  
In N. Atlantic: TRUE, In N. Pacific: TRUE  
Typically Monitored: TRUE  
Comment:

Instrument: GCxGC-TOF, EI, 70 eV  
1D RT, 2D RT (s): 1768.33, 1.604  
Quantitative Ion m/z: 644

Elemental Formula: C<sub>12</sub>H<sub>4</sub>Br<sub>6</sub>O  
Source: anthropogenic  
Identification: Authentic MS RT

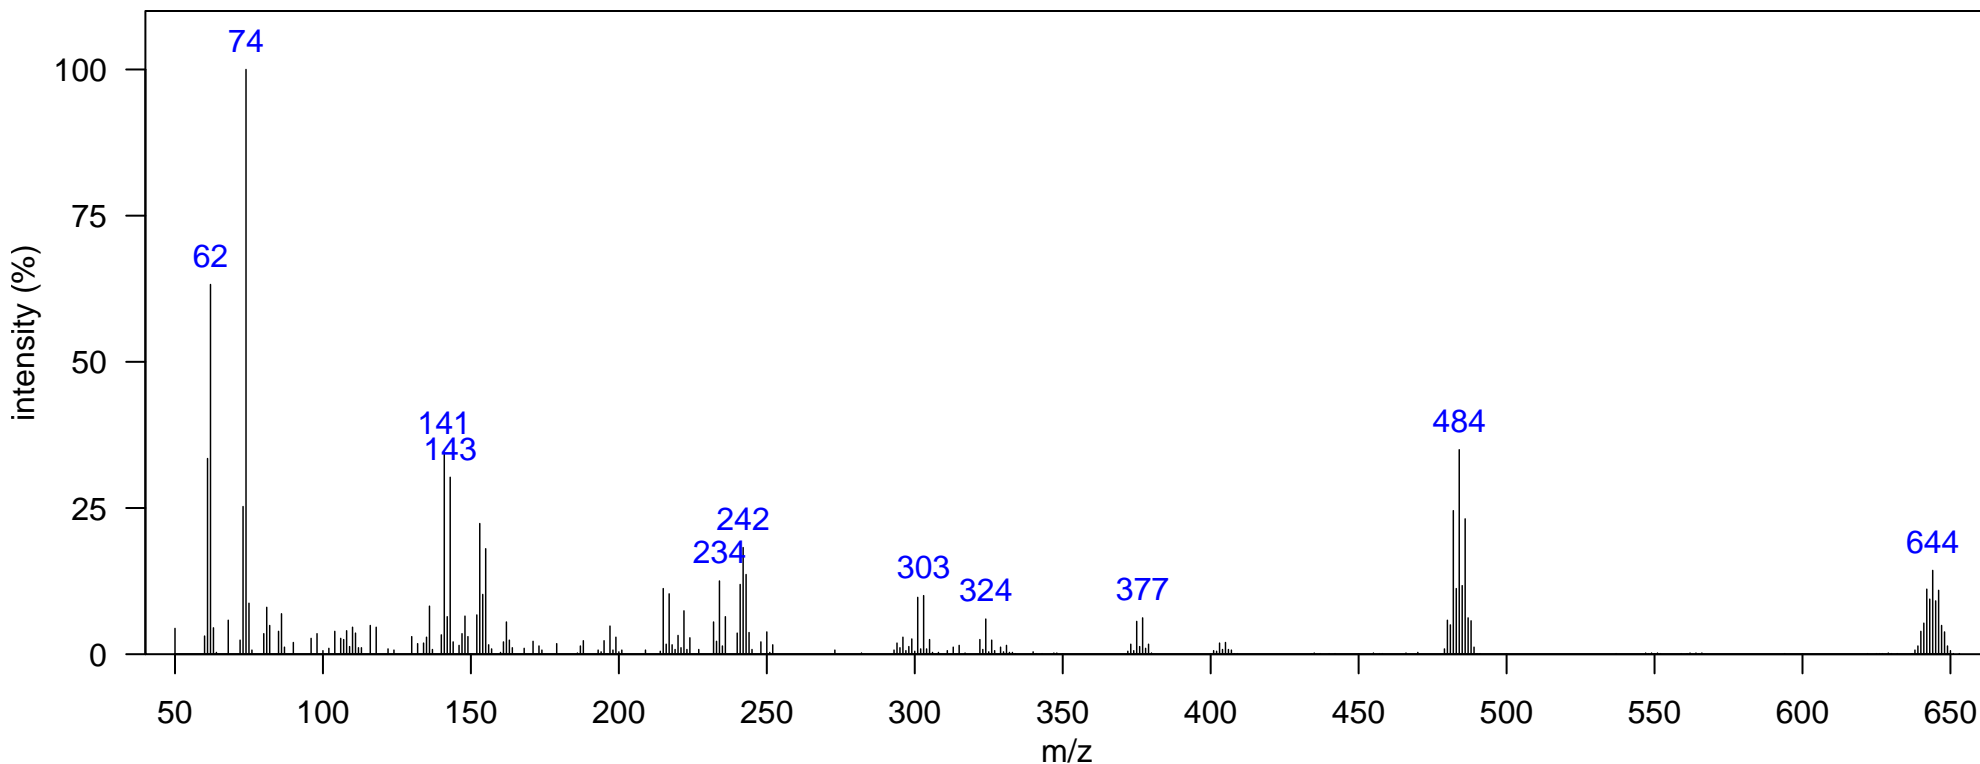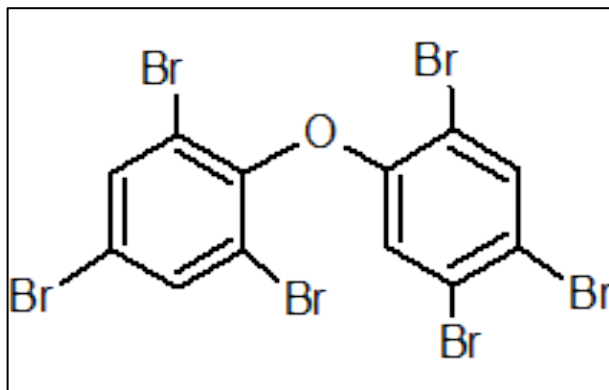

| m/z [Fragment]                        |
|---------------------------------------|
| 480 [M-Br <sub>2</sub> ] <sup>+</sup> |
| 638 M <sup>+</sup>                    |

Name: BDE-153

Class: PBDE

Matrix: South Atlantic Dolphin Blubber  
In N. Atlantic: TRUE, In N. Pacific: TRUE  
Typically Monitored: TRUE  
Comment:

Instrument: GCxGC-TOF, EI, 70 eV  
1D RT, 2D RT (s): 1813.81, 1.729  
Quantitative Ion m/z: 644

Elemental Formula: C<sub>12</sub>H<sub>4</sub>Br<sub>6</sub>O  
Source: anthropogenic  
Identification: Authentic MS RT

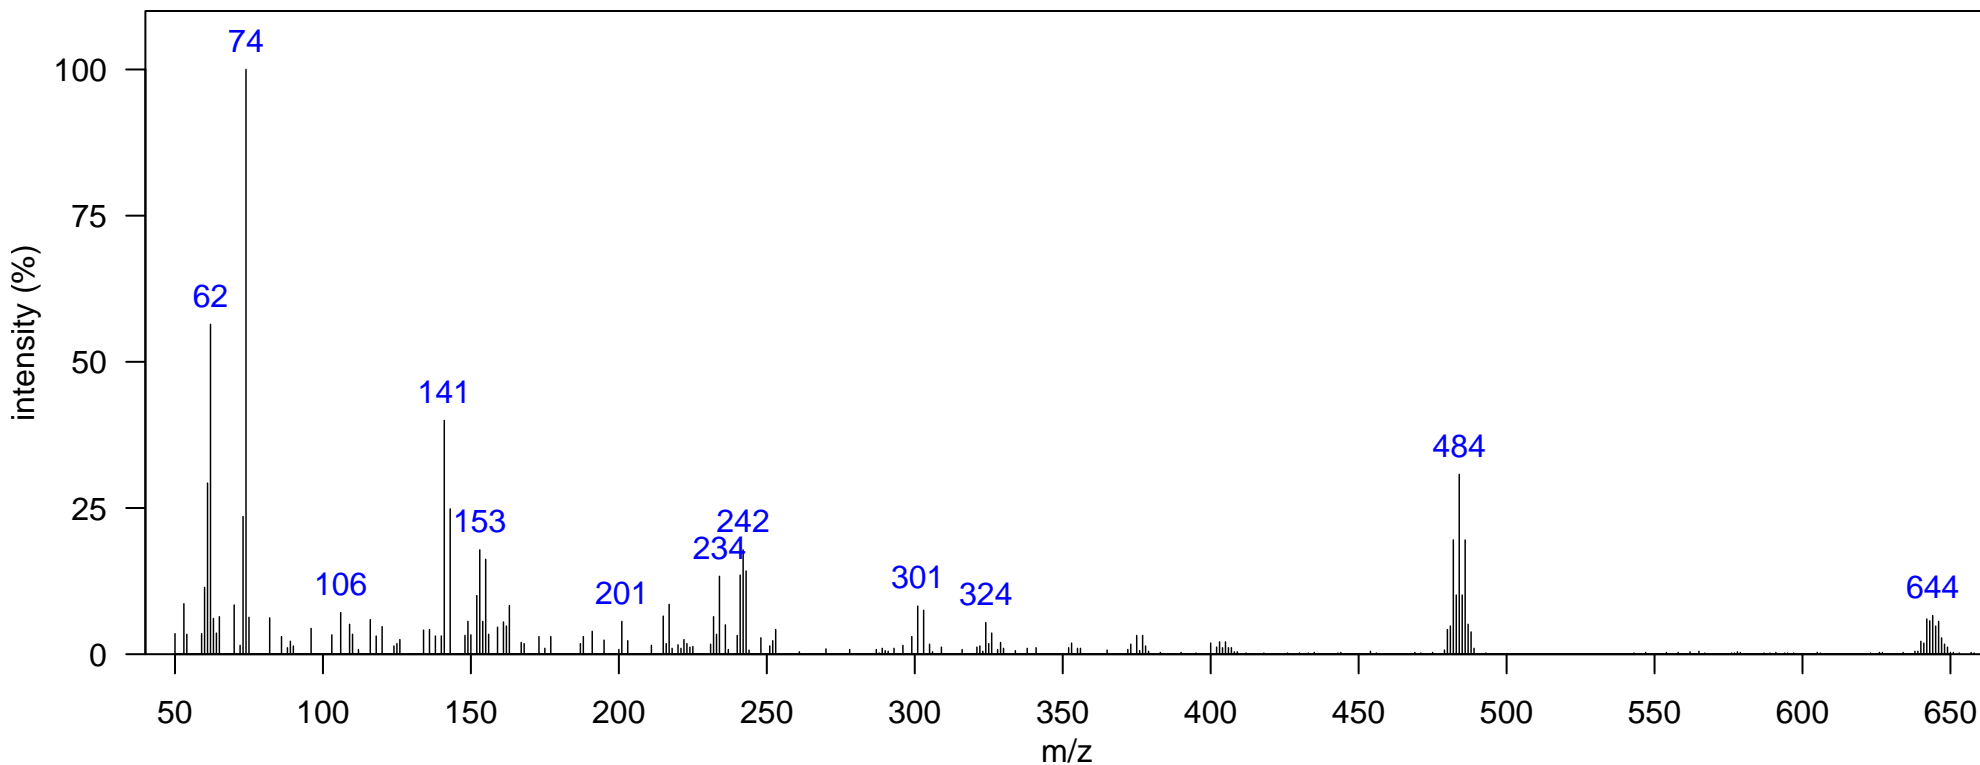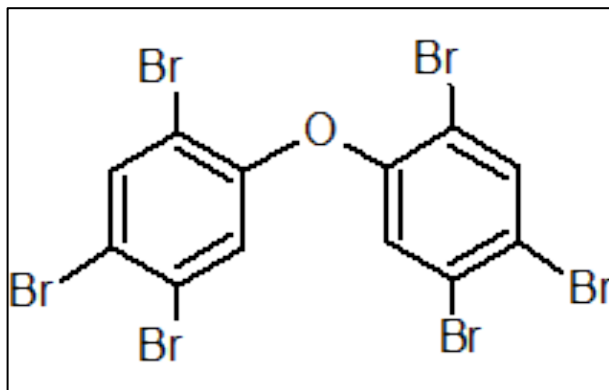

| m/z [Fragment]                        |
|---------------------------------------|
| 480 [M-Br <sub>2</sub> ] <sup>+</sup> |
| 638 M <sup>+</sup>                    |

Name: BDE 6Br

Class: PBDE

Matrix: South Atlantic Dolphin Blubber  
In N. Atlantic: TRUE, In N. Pacific: FALSE  
Typically Monitored: FALSE  
Comment:

Instrument: GCxGC-TOF, EI, 70 eV  
1D RT, 2D RT (s): 1831.3, 1.874  
Quantitative Ion m/z: 644

Elemental Formula: C<sub>12</sub>H<sub>4</sub>Br<sub>6</sub>O  
Source: anthropogenic  
Identification: Manual-Congener Group

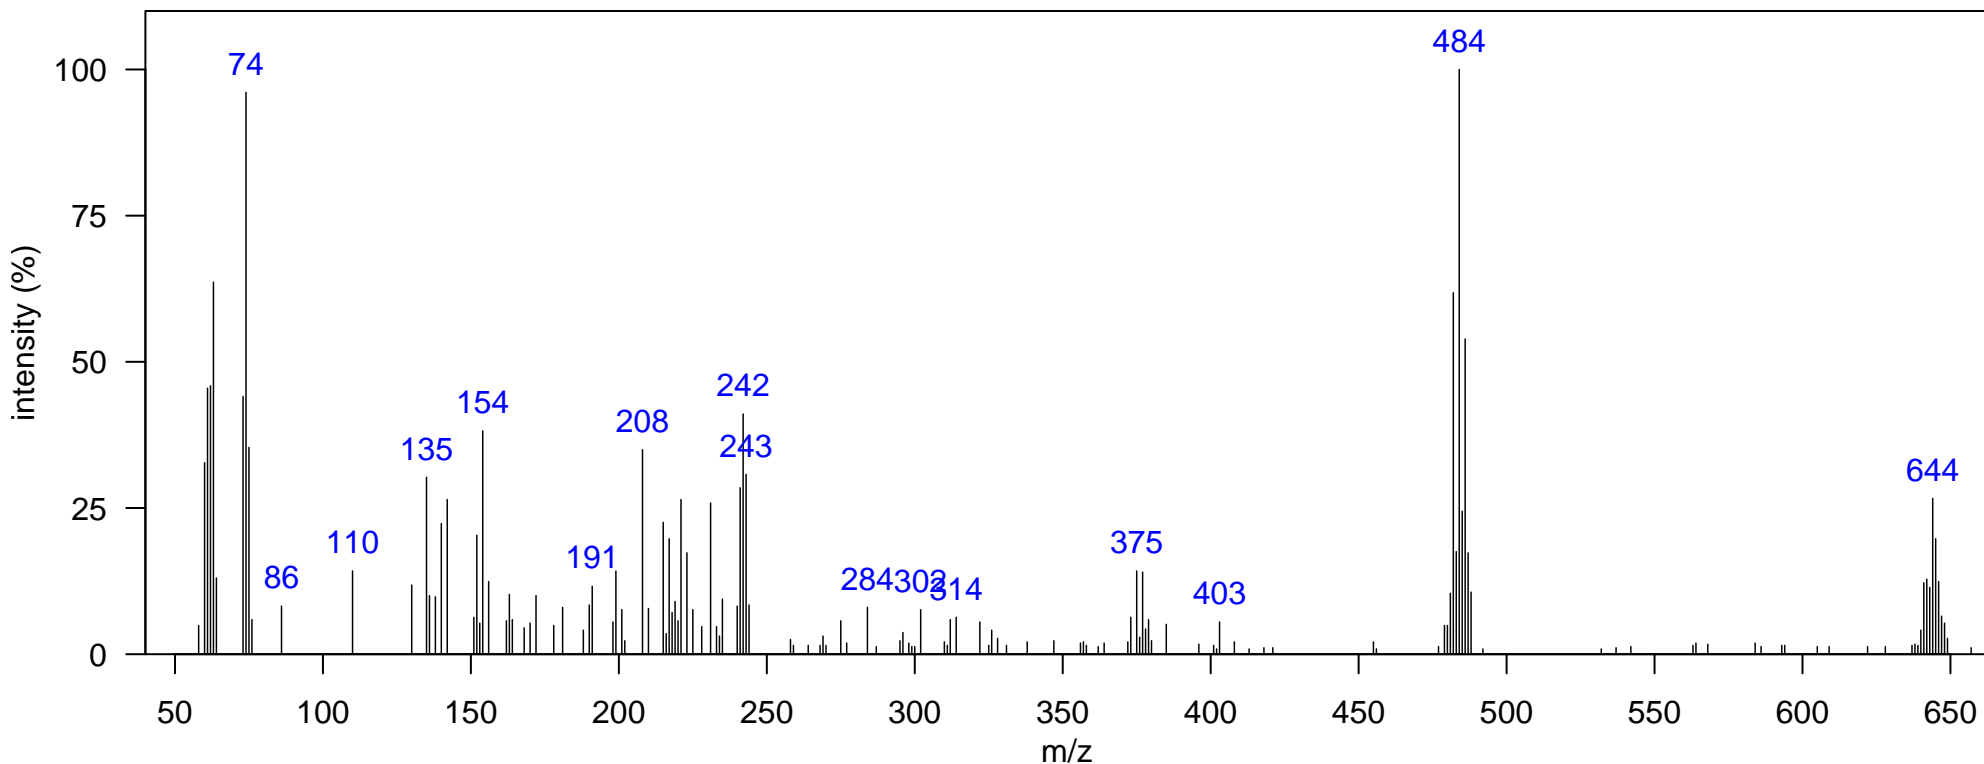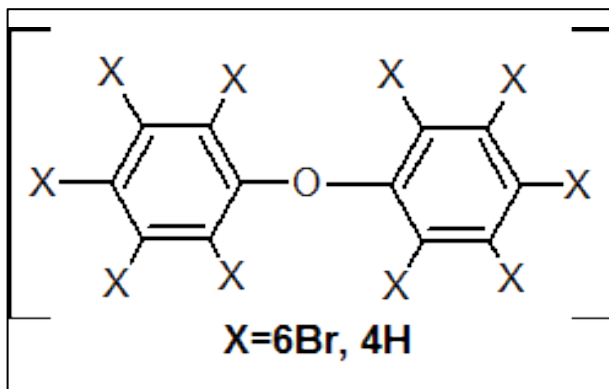

| m/z [Fragment]                        |
|---------------------------------------|
| 480 [M-Br <sub>2</sub> ] <sup>+</sup> |
| 638 M <sup>+</sup>                    |

Name: terphenyl 5Cl 1

Class: PCT

Matrix: South Atlantic Dolphin Blubber  
In N. Atlantic: FALSE, In N. Pacific: TRUE  
Typically Monitored: FALSE  
Comment: terphenyl 5Cl 4 (Pacific Library)

Instrument: GCxGC-TOF, EI, 70 eV  
1D RT, 2D RT (s): 1719.36, 1.439  
Quantitative Ion m/z: 402

Elemental Formula: C<sub>18</sub>H<sub>9</sub>Cl<sub>5</sub>  
Source: anthropogenic  
Identification: Manual-Congener Group

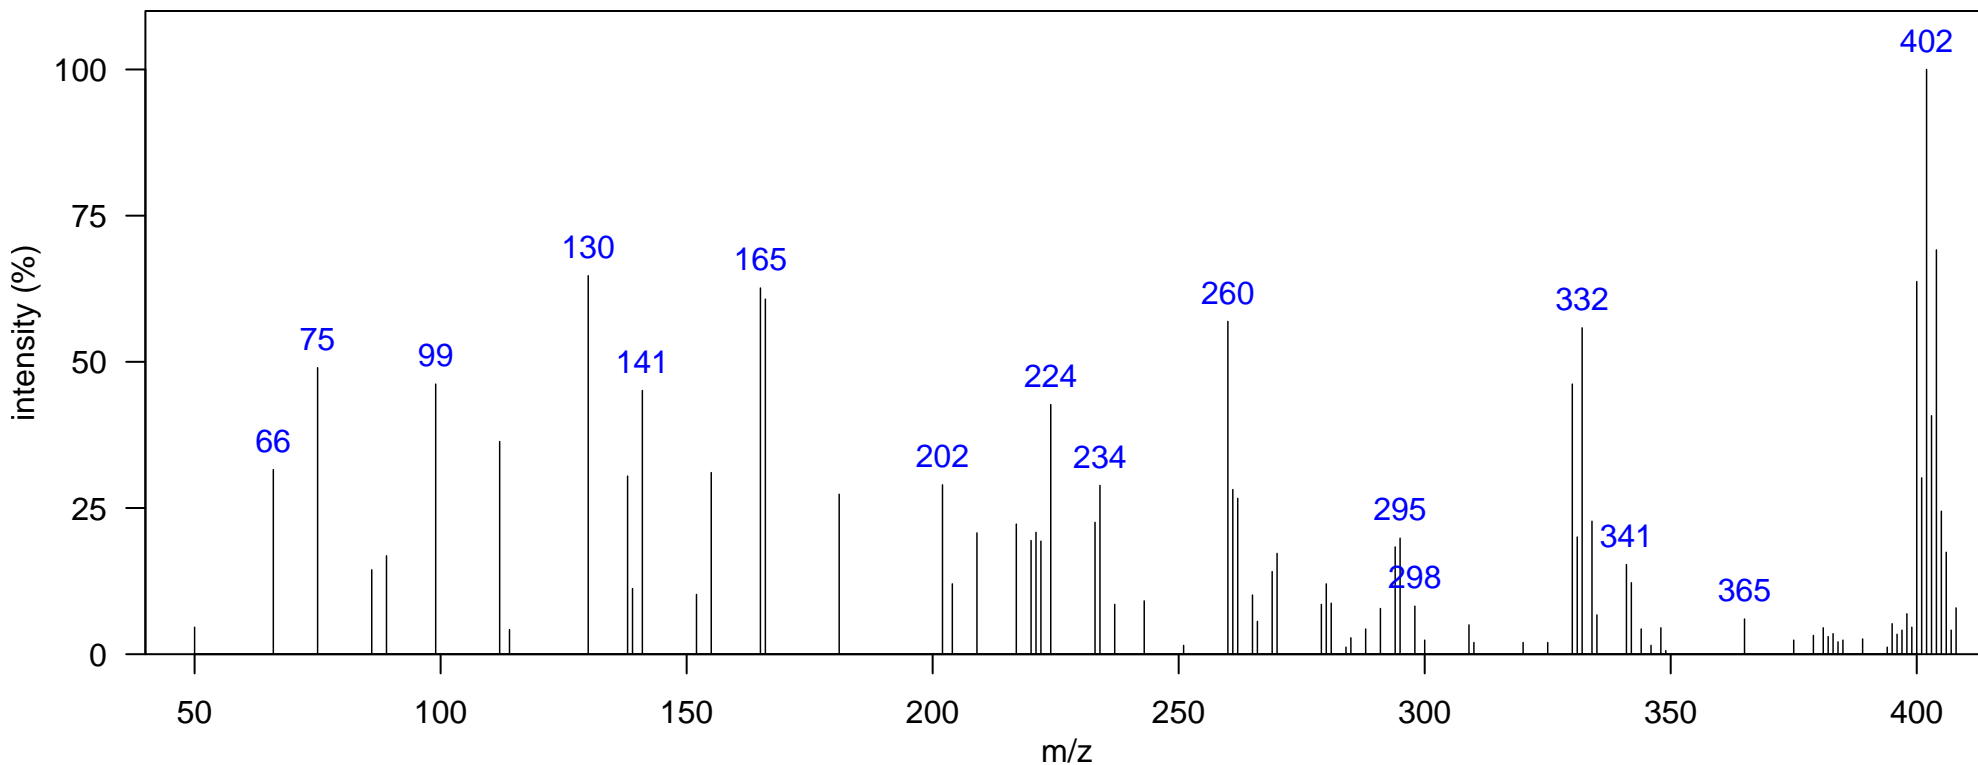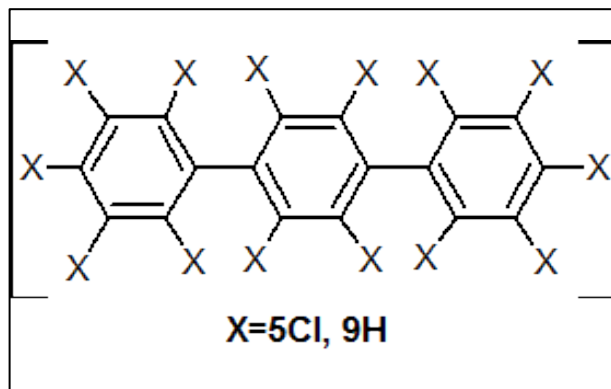

| m/z [Fragment]                        |
|---------------------------------------|
| 330 [M-Cl <sub>2</sub> ] <sup>+</sup> |
| 400 M <sup>+</sup>                    |

Name: terphenyl 6Cl 1

Class: PCT

Matrix: South Atlantic Dolphin Blubber  
In N. Atlantic: FALSE, In N. Pacific: FALSE  
Typically Monitored: FALSE  
Comment:

Instrument: GCxGC-TOF, EI, 70 eV  
1D RT, 2D RT (s): 1628.41, 1.406  
Quantitative Ion m/z: 438

Elemental Formula: C<sub>18</sub>H<sub>8</sub>Cl<sub>6</sub>  
Source: anthropogenic  
Identification: Manual-Congener Group

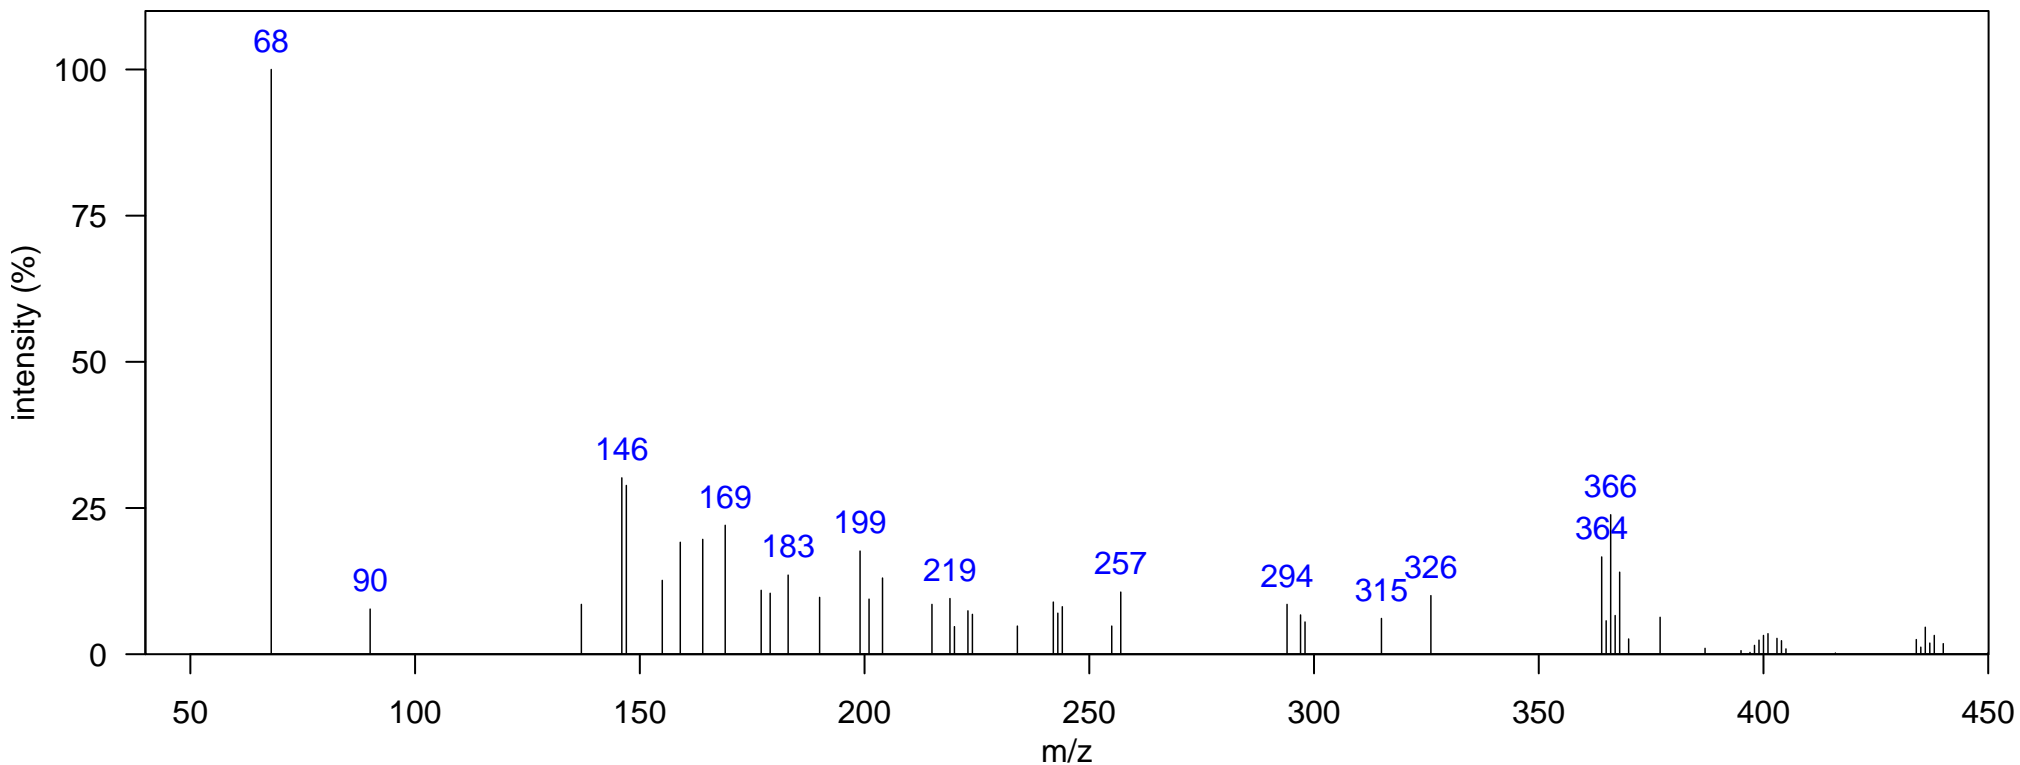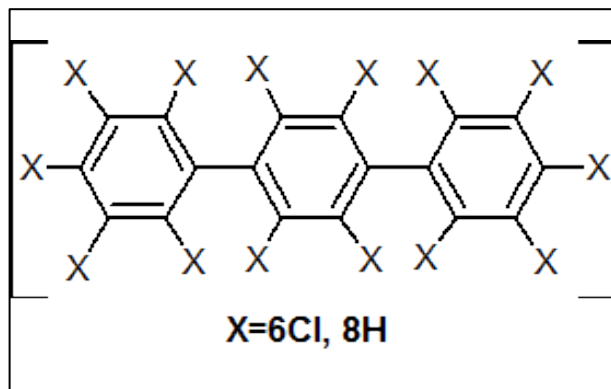

| m/z [Fragment]                        |
|---------------------------------------|
| 364 [M-Cl <sub>2</sub> ] <sup>+</sup> |
| 434 M <sup>+</sup>                    |



Name: terphenyl 6Cl 2

Class: PCT

Matrix: South Atlantic Dolphin Blubber  
In N. Atlantic: FALSE, In N. Pacific: TRUE  
Typically Monitored: FALSE  
Comment: terphenyl 6Cl 1 (Pacific Library)

Instrument: GCxGC-TOF, EI, 70 eV  
1D RT, 2D RT (s): 1694.87, 1.485  
Quantitative Ion m/z: 438

Elemental Formula: C<sub>18</sub>H<sub>8</sub>Cl<sub>6</sub>  
Source: anthropogenic  
Identification: Manual-Congener Group

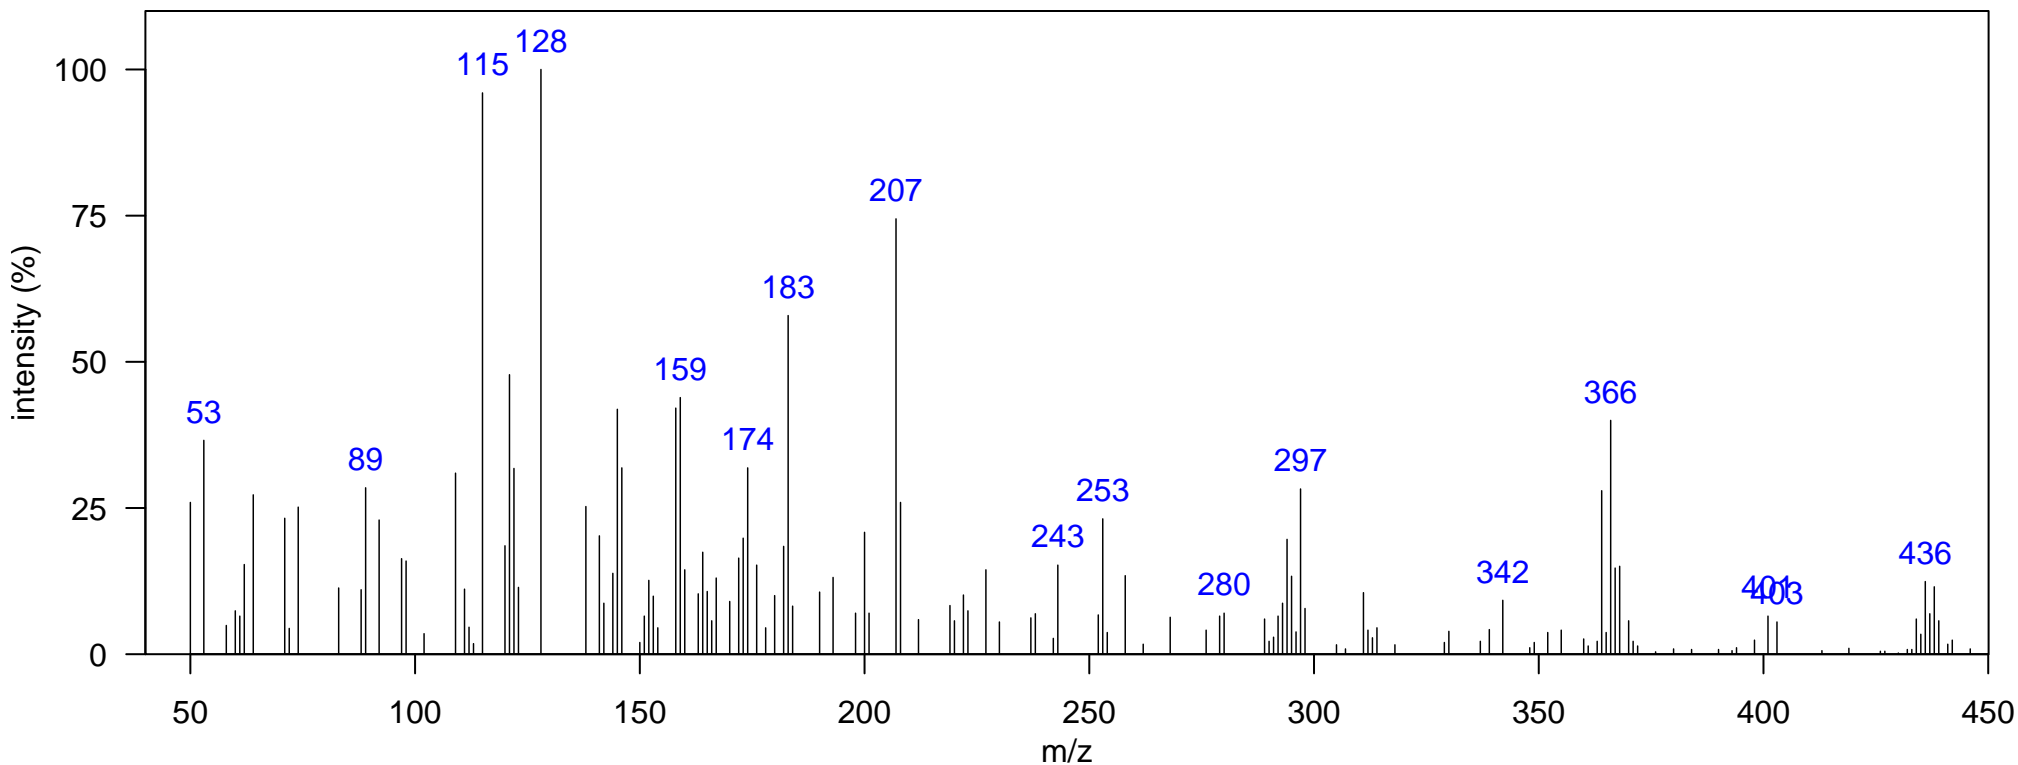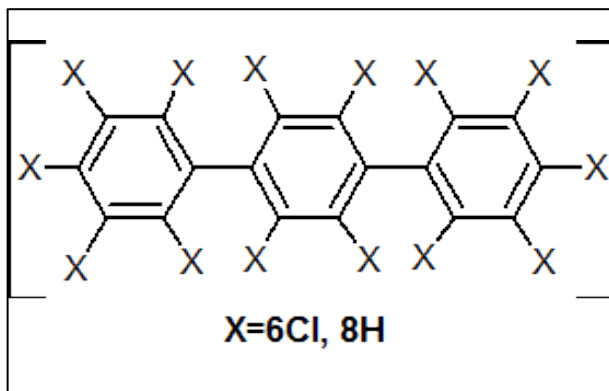

| m/z [Fragment]                        |
|---------------------------------------|
| 364 [M-Cl <sub>2</sub> ] <sup>+</sup> |
| 434 M <sup>+</sup>                    |

Name: terphenyl 6Cl 3

Class: PCT

Matrix: South Atlantic Dolphin Blubber  
In N. Atlantic: FALSE, In N. Pacific: FALSE  
Typically Monitored: FALSE  
Comment:

Instrument: GCxGC-TOF, EI, 70 eV  
1D RT, 2D RT (s): 1708.87, 1.452  
Quantitative Ion m/z: 438

Elemental Formula: C<sub>18</sub>H<sub>8</sub>Cl<sub>6</sub>  
Source: anthropogenic  
Identification: Manual-Congener Group

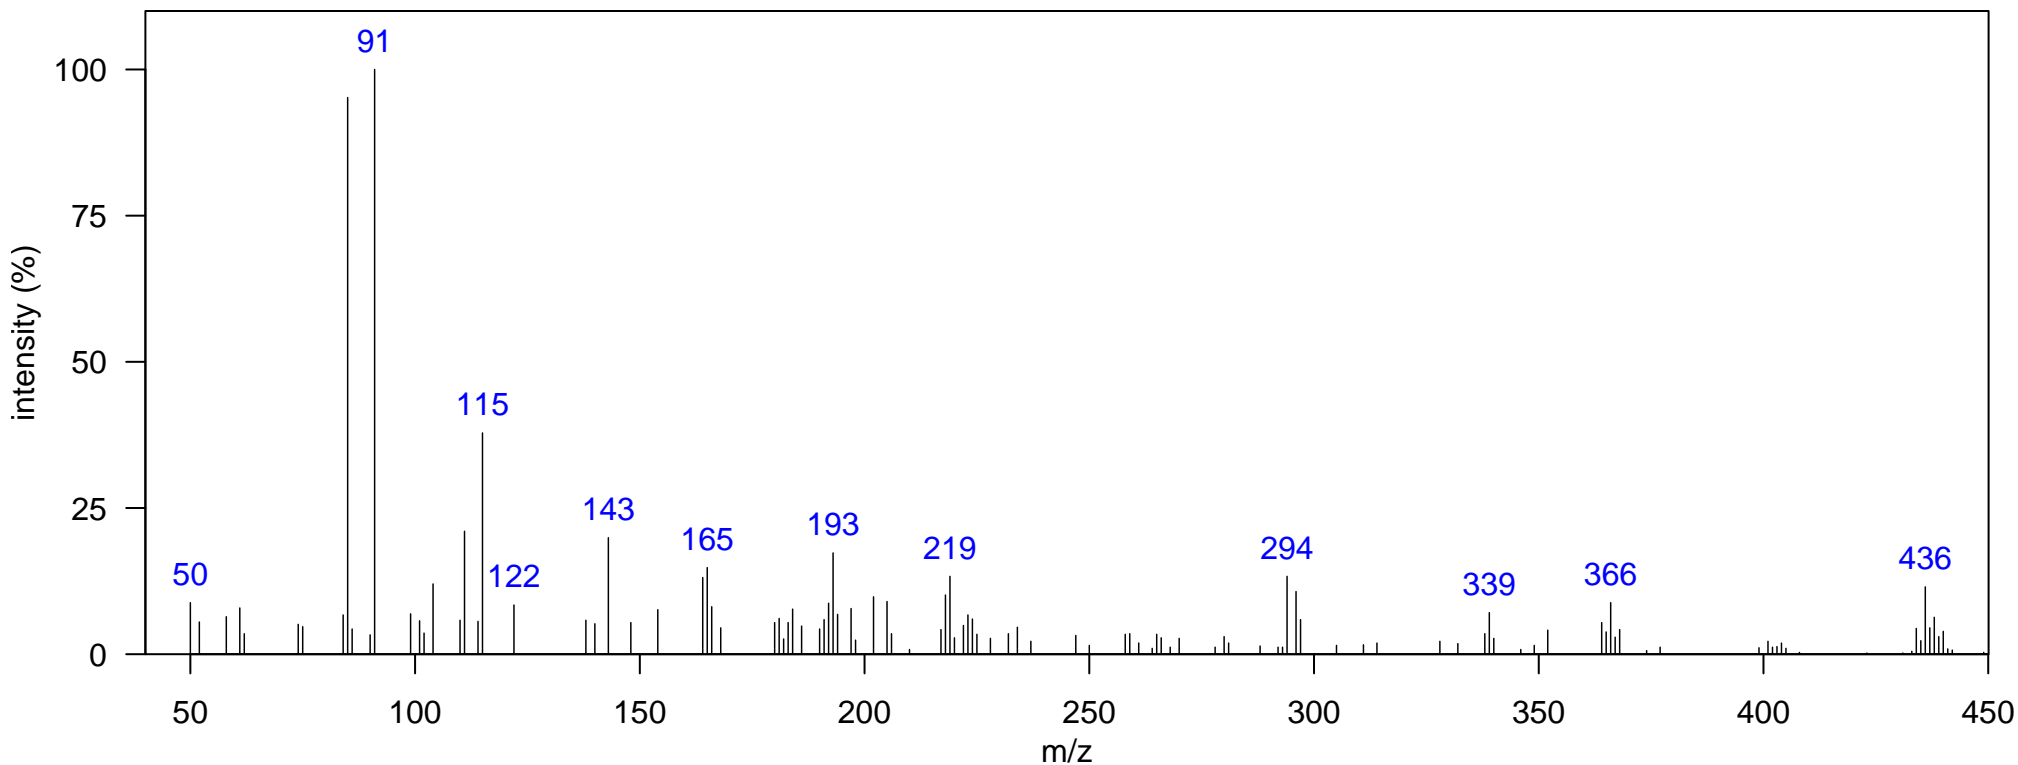

| m/z [Fragment]                        |
|---------------------------------------|
| 364 [M-Cl <sub>2</sub> ] <sup>+</sup> |
| 434 M <sup>+</sup>                    |

Name: terphenyl 6Cl 4

Class: PCT

Matrix: South Atlantic Dolphin Blubber  
In N. Atlantic: FALSE, In N. Pacific: TRUE  
Typically Monitored: FALSE  
Comment: terphenyl 6Cl 2 (Pacific Library)

Instrument: GCxGC-TOF, EI, 70 eV  
1D RT, 2D RT (s): 1719.36, 1.386  
Quantitative Ion m/z: 438

Elemental Formula: C<sub>18</sub>H<sub>8</sub>Cl<sub>6</sub>  
Source: anthropogenic  
Identification: Manual-Congener Group

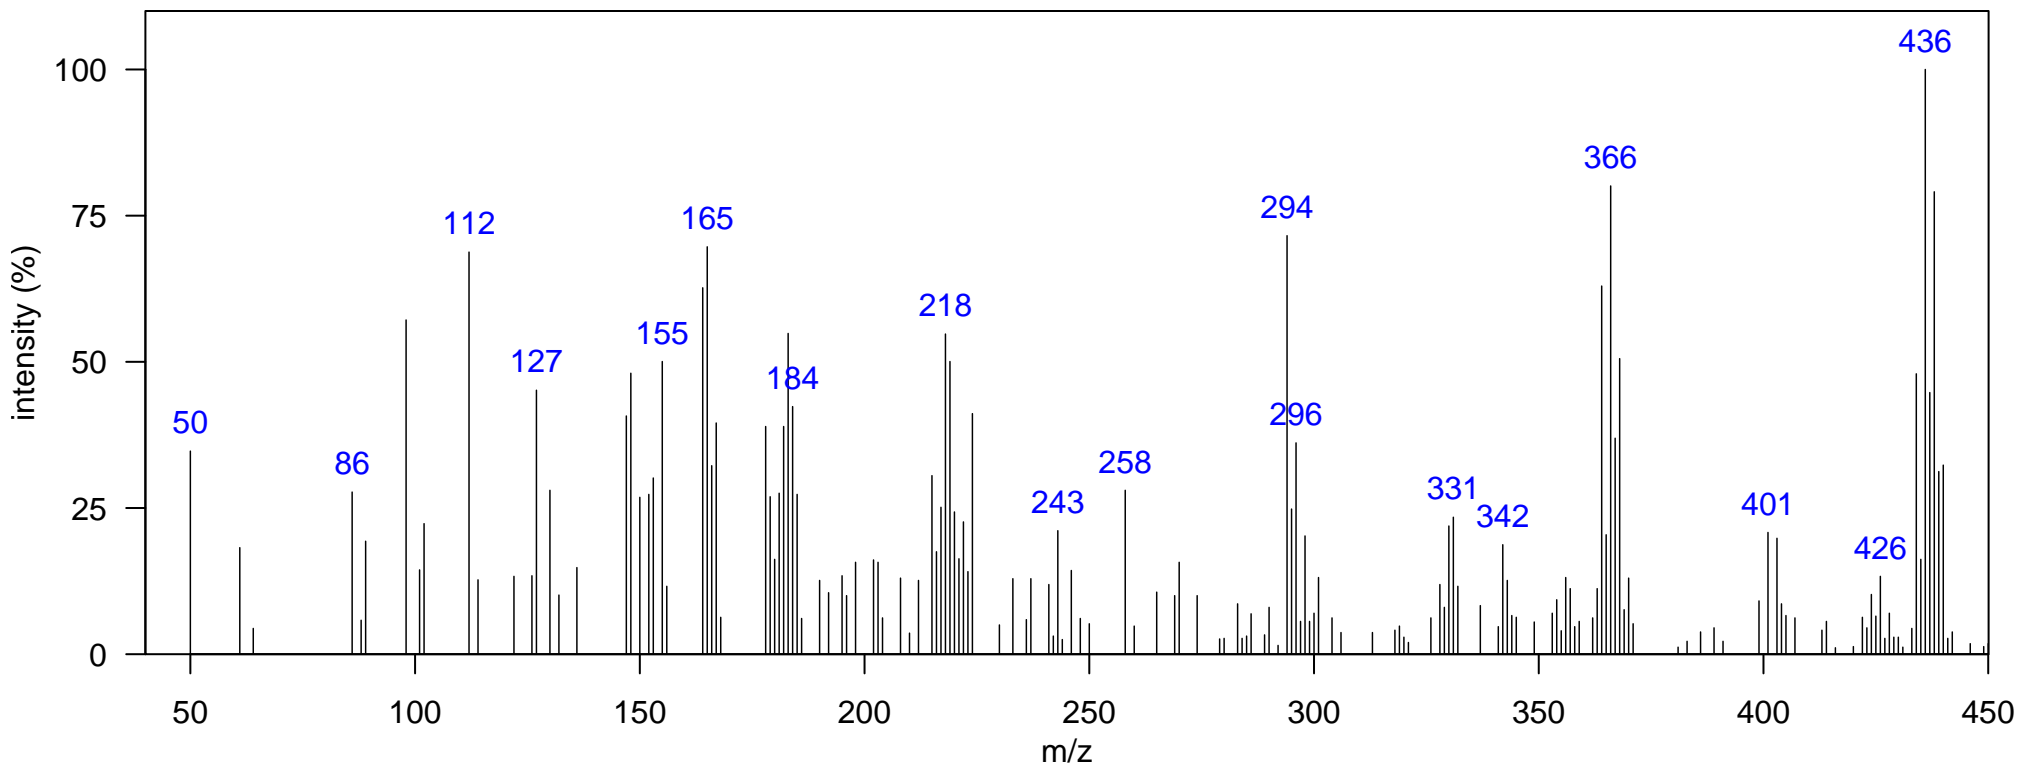

| m/z [Fragment]                        |
|---------------------------------------|
| 364 [M-Cl <sub>2</sub> ] <sup>+</sup> |
| 434 M <sup>+</sup>                    |

Name: terphenyl 6Cl 5

Class: PCT

Matrix: South Atlantic Dolphin Blubber  
In N. Atlantic: FALSE, In N. Pacific: TRUE  
Typically Monitored: FALSE  
Comment: terphenyl 6Cl 3 (Pacific Library)

Instrument: GCxGC-TOF, EI, 70 eV  
1D RT, 2D RT (s): 1736.85, 1.393  
Quantitative Ion m/z: 438

Elemental Formula: C<sub>18</sub>H<sub>8</sub>Cl<sub>6</sub>  
Source: anthropogenic  
Identification: Manual-Congener Group

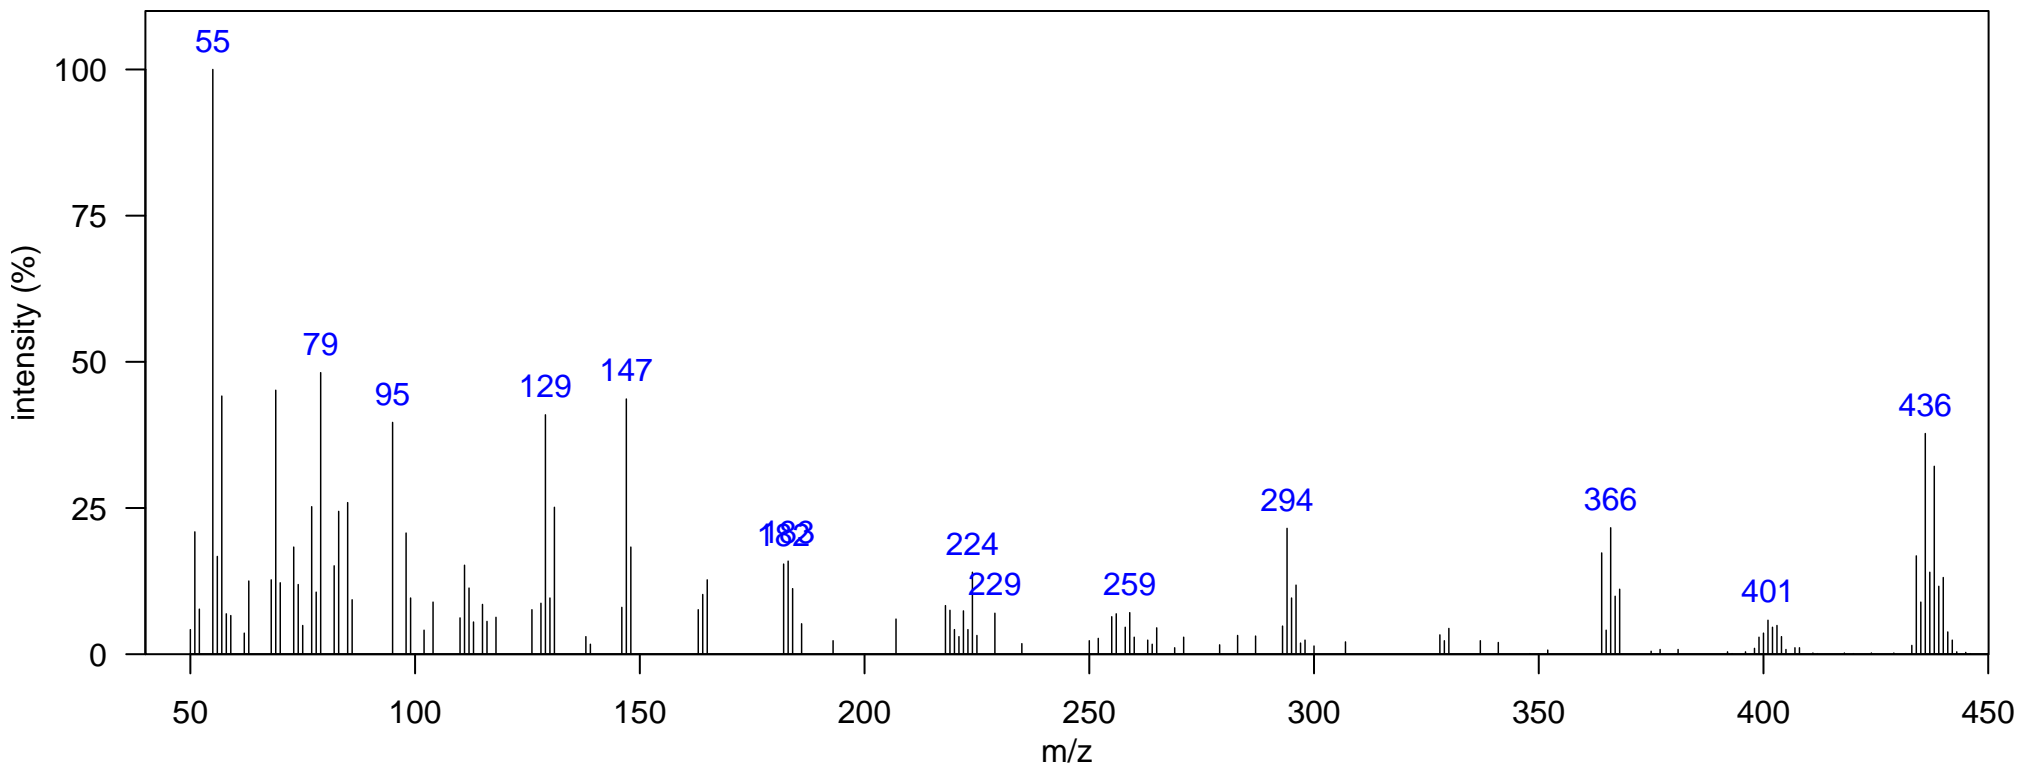

| m/z [Fragment]                        |
|---------------------------------------|
| 364 [M-Cl <sub>2</sub> ] <sup>+</sup> |
| 434 M <sup>+</sup>                    |

Name: terphenyl 6Cl 6

Class: PCT

Matrix: South Atlantic Dolphin Blubber  
In N. Atlantic: FALSE, In N. Pacific: TRUE  
Typically Monitored: FALSE  
Comment: terphenyl 6Cl 4 (Pacific Library)

Instrument: GCxGC-TOF, EI, 70 eV  
1D RT, 2D RT (s): 1743.85, 1.393  
Quantitative Ion m/z: 438

Elemental Formula: C<sub>18</sub>H<sub>8</sub>Cl<sub>6</sub>  
Source: anthropogenic  
Identification: Manual-Congener Group

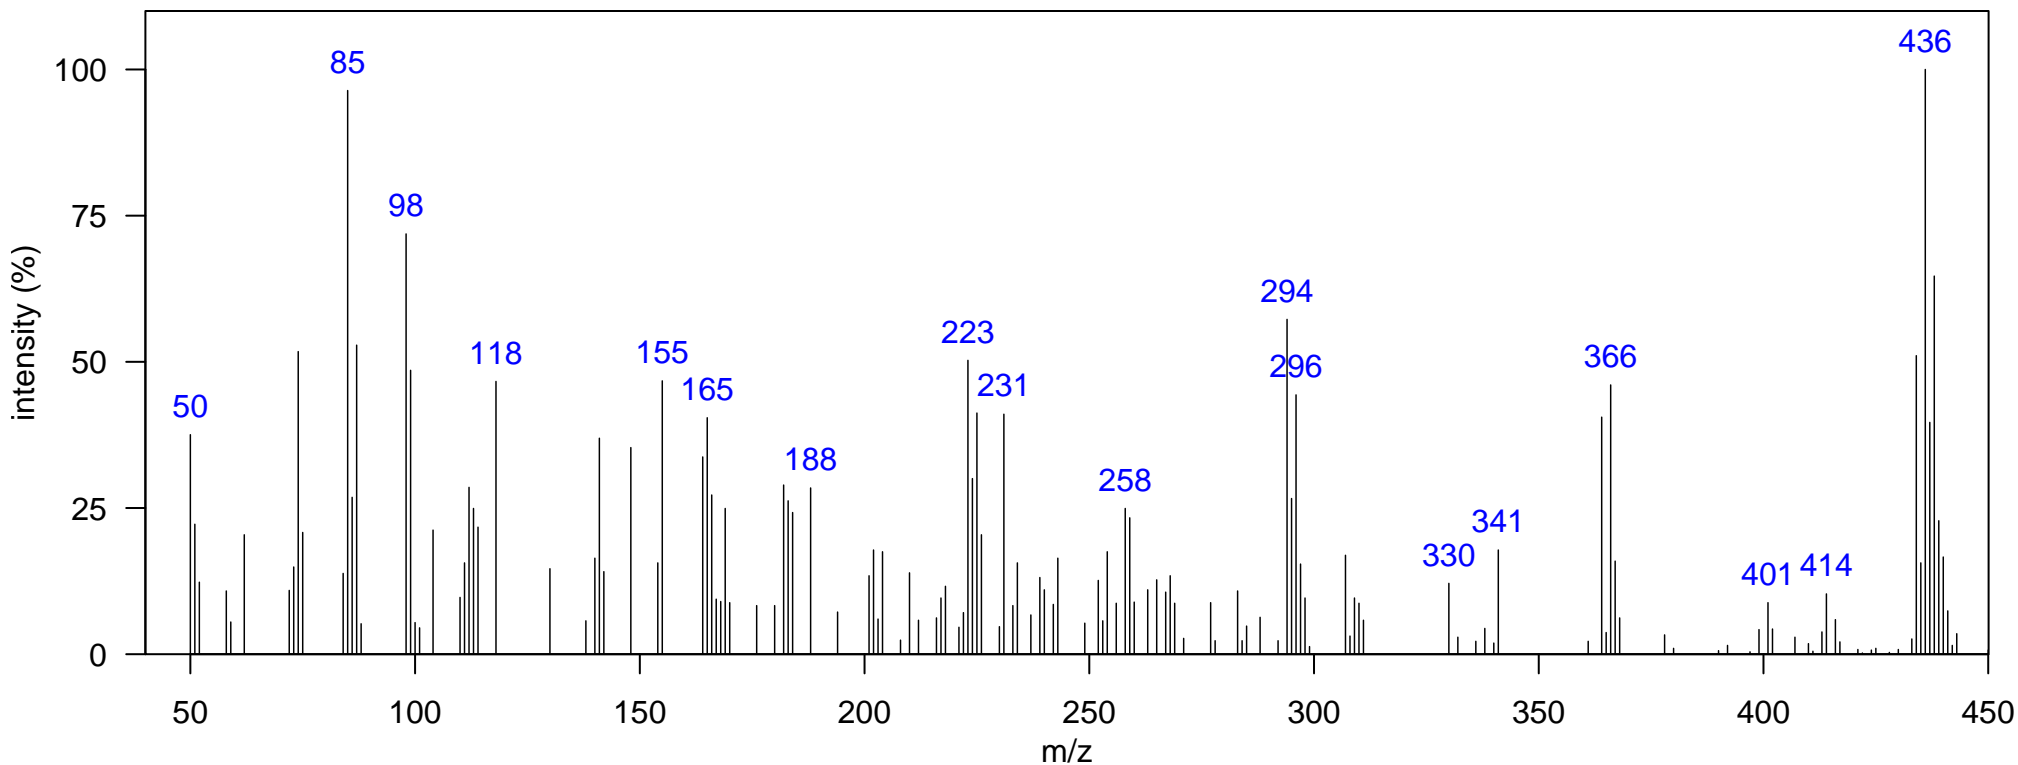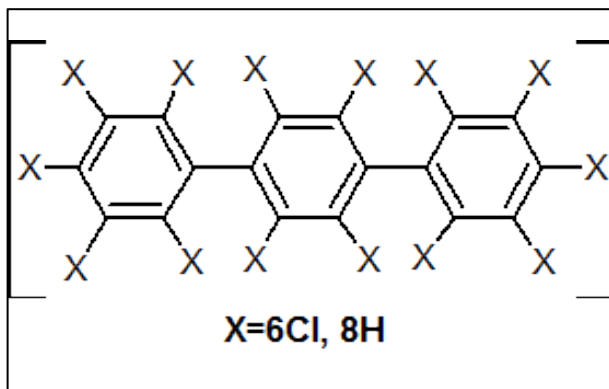

| m/z [Fragment]                        |
|---------------------------------------|
| 364 [M-Cl <sub>2</sub> ] <sup>+</sup> |
| 434 M <sup>+</sup>                    |

Name: terphenyl 6Cl 7

Class: PCT

Matrix: South Atlantic Dolphin Blubber  
In N. Atlantic: FALSE, In N. Pacific: TRUE  
Typically Monitored: FALSE  
Comment: terphenyl 6Cl 5 (Pacific Library)

Instrument: GCxGC-TOF, EI, 70 eV  
1D RT, 2D RT (s): 1768.33, 1.452  
Quantitative Ion m/z: 438

Elemental Formula: C<sub>18</sub>H<sub>8</sub>Cl<sub>6</sub>  
Source: anthropogenic  
Identification: Manual-Congener Group

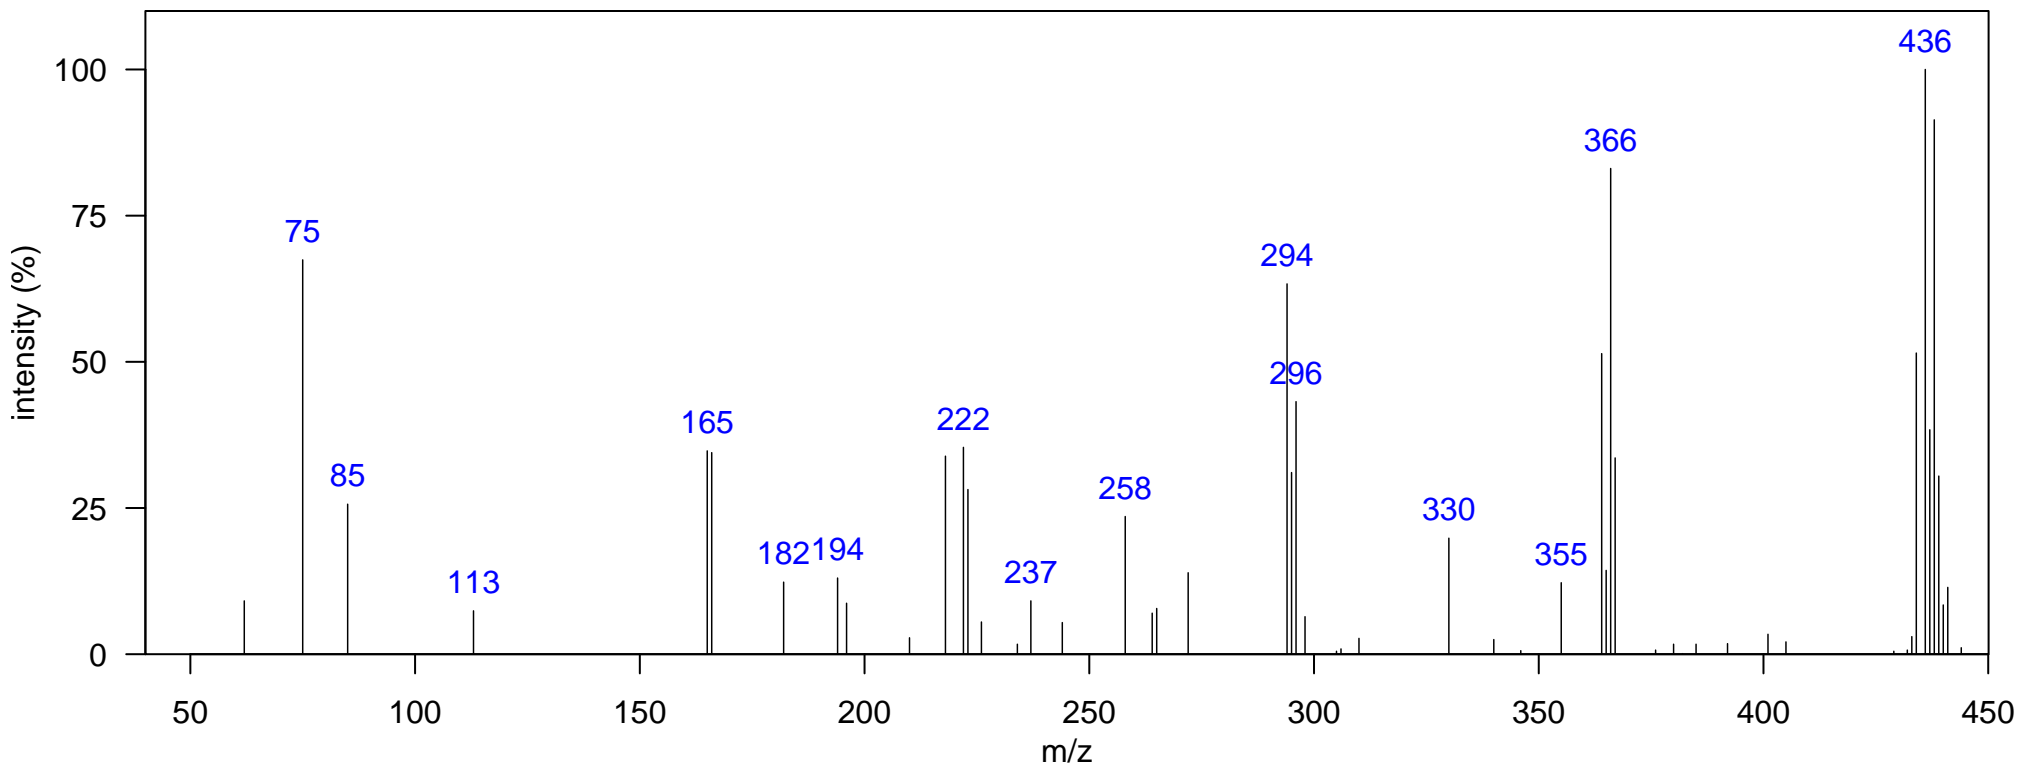

| m/z [Fragment]                        |
|---------------------------------------|
| 364 [M-Cl <sub>2</sub> ] <sup>+</sup> |
| 434 M <sup>+</sup>                    |

Name: terphenyl 6Cl 8

Class: PCT

Matrix: South Atlantic Dolphin Blubber  
In N. Atlantic: FALSE, In N. Pacific: FALSE  
Typically Monitored: FALSE  
Comment:

Instrument: GCxGC-TOF, EI, 70 eV  
1D RT, 2D RT (s): 1778.83, 1.525  
Quantitative Ion m/z: 438

Elemental Formula: C<sub>18</sub>H<sub>8</sub>Cl<sub>6</sub>  
Source: anthropogenic  
Identification: Manual-Congener Group

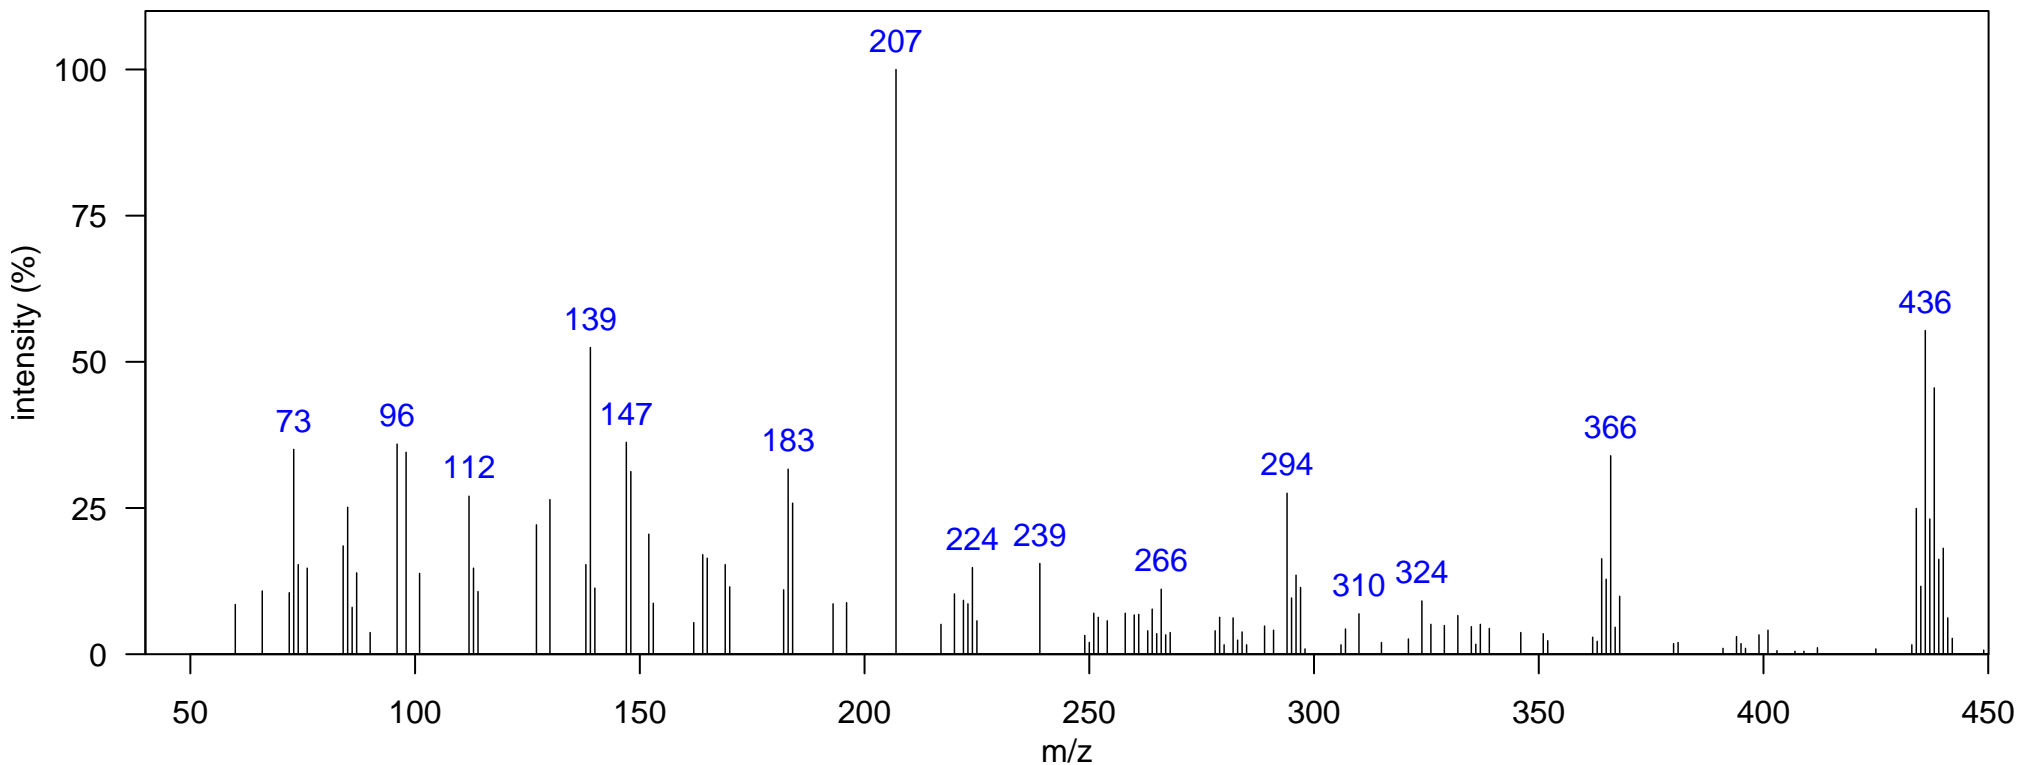

| m/z [Fragment]                        |
|---------------------------------------|
| 364 [M-Cl <sub>2</sub> ] <sup>+</sup> |
| 434 M <sup>+</sup>                    |

Name: terphenyl 6Cl 9

Class: PCT

Matrix: South Atlantic Dolphin Blubber  
In N. Atlantic: FALSE, In N. Pacific: TRUE  
Typically Monitored: FALSE  
Comment: terphenyl 6Cl 6 (Pacific Library)

Instrument: GCxGC-TOF, EI, 70 eV  
1D RT, 2D RT (s): 1782.32, 1.518  
Quantitative Ion m/z: 438

Elemental Formula: C<sub>18</sub>H<sub>8</sub>Cl<sub>6</sub>  
Source: anthropogenic  
Identification: Manual-Congener Group

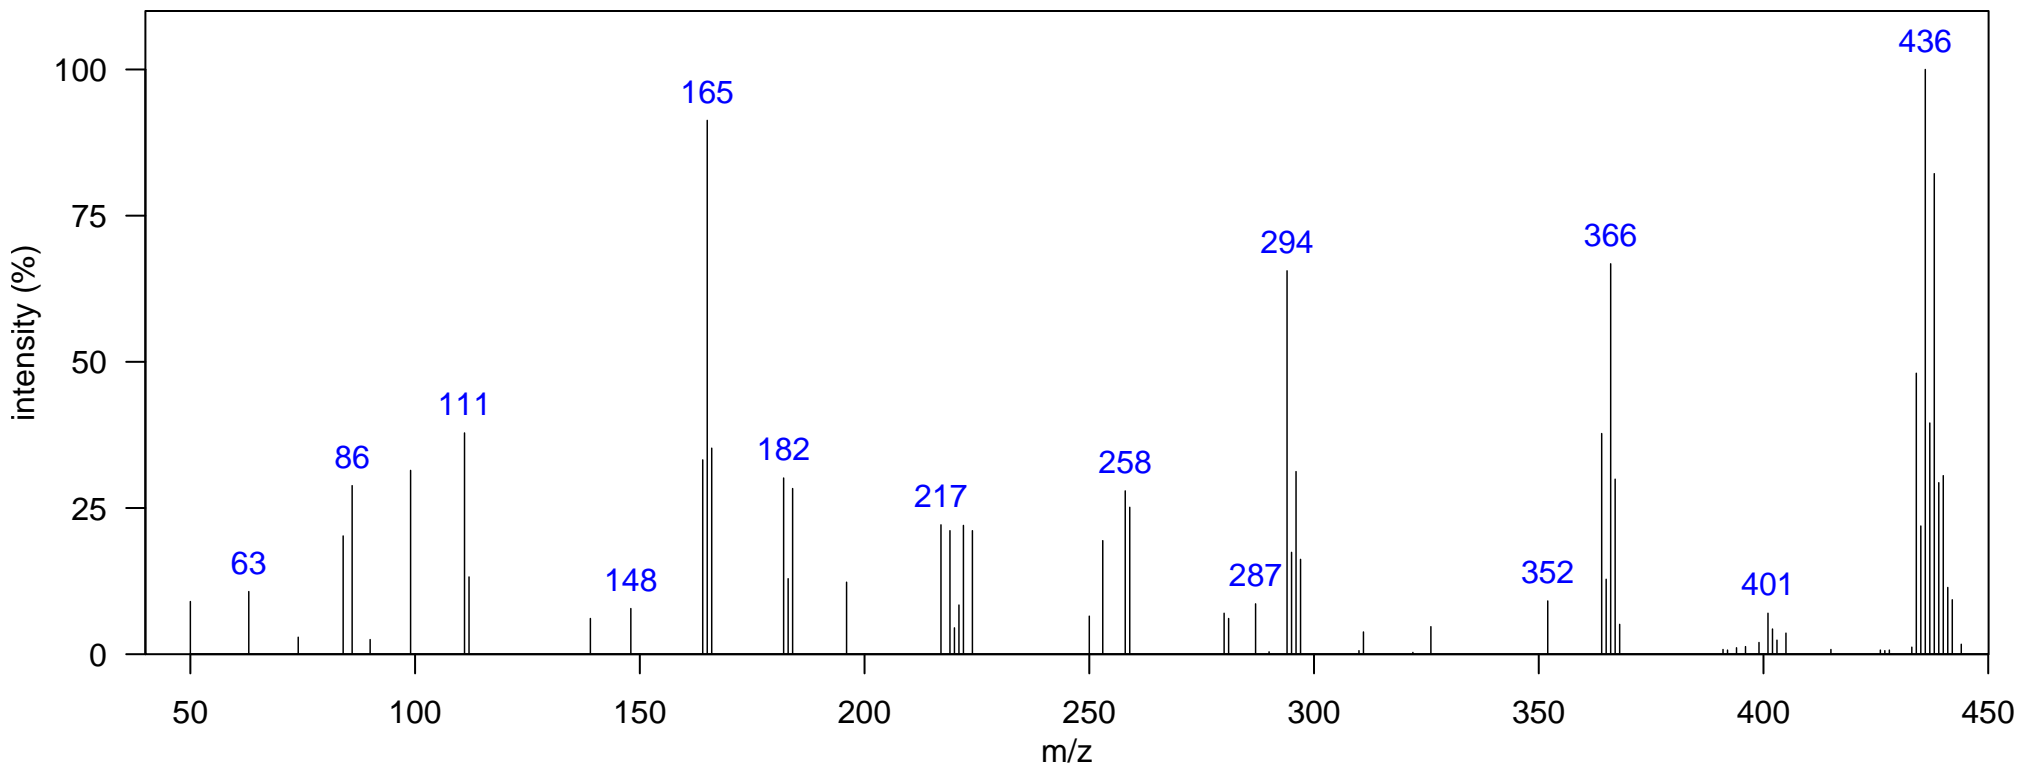

| m/z [Fragment]                        |
|---------------------------------------|
| 364 [M-Cl <sub>2</sub> ] <sup>+</sup> |
| 434 M <sup>+</sup>                    |



Name: terphenyl 6Cl 10

Class: PCT

Matrix: South Atlantic Dolphin Blubber  
In N. Atlantic: FALSE, In N. Pacific: TRUE  
Typically Monitored: FALSE  
Comment: terphenyl 6Cl 7 (Pacific Library)

Instrument: GCxGC-TOF, EI, 70 eV  
1D RT, 2D RT (s): 1789.32, 1.564  
Quantitative Ion m/z: 438

Elemental Formula: C<sub>18</sub>H<sub>8</sub>Cl<sub>6</sub>  
Source: anthropogenic  
Identification: Manual-Congener Group

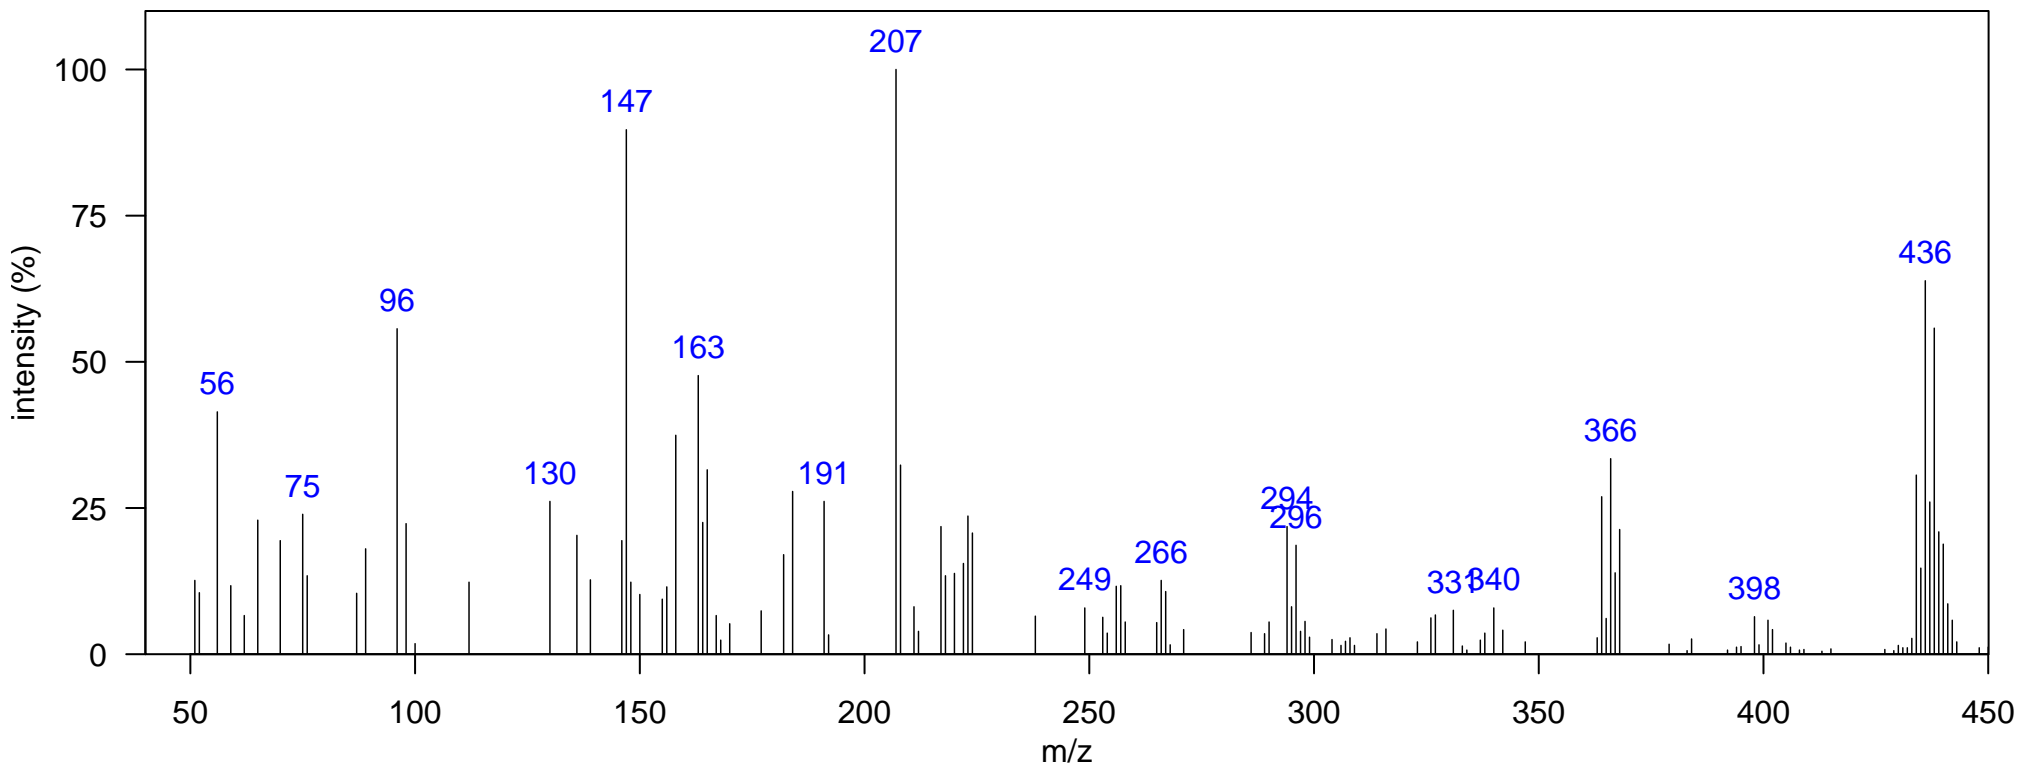

| m/z [Fragment]                        |
|---------------------------------------|
| 364 [M-Cl <sub>2</sub> ] <sup>+</sup> |
| 434 M <sup>+</sup>                    |

Name: terphenyl 6Cl 11

Class: PCT

Matrix: South Atlantic Dolphin Blubber  
In N. Atlantic: FALSE, In N. Pacific: FALSE  
Typically Monitored: FALSE  
Comment:

Instrument: GCxGC-TOF, EI, 70 eV  
1D RT, 2D RT (s): 1799.81, 1.485  
Quantitative Ion m/z: 438

Elemental Formula: C<sub>18</sub>H<sub>8</sub>Cl<sub>6</sub>  
Source: anthropogenic  
Identification: Manual-Congener Group

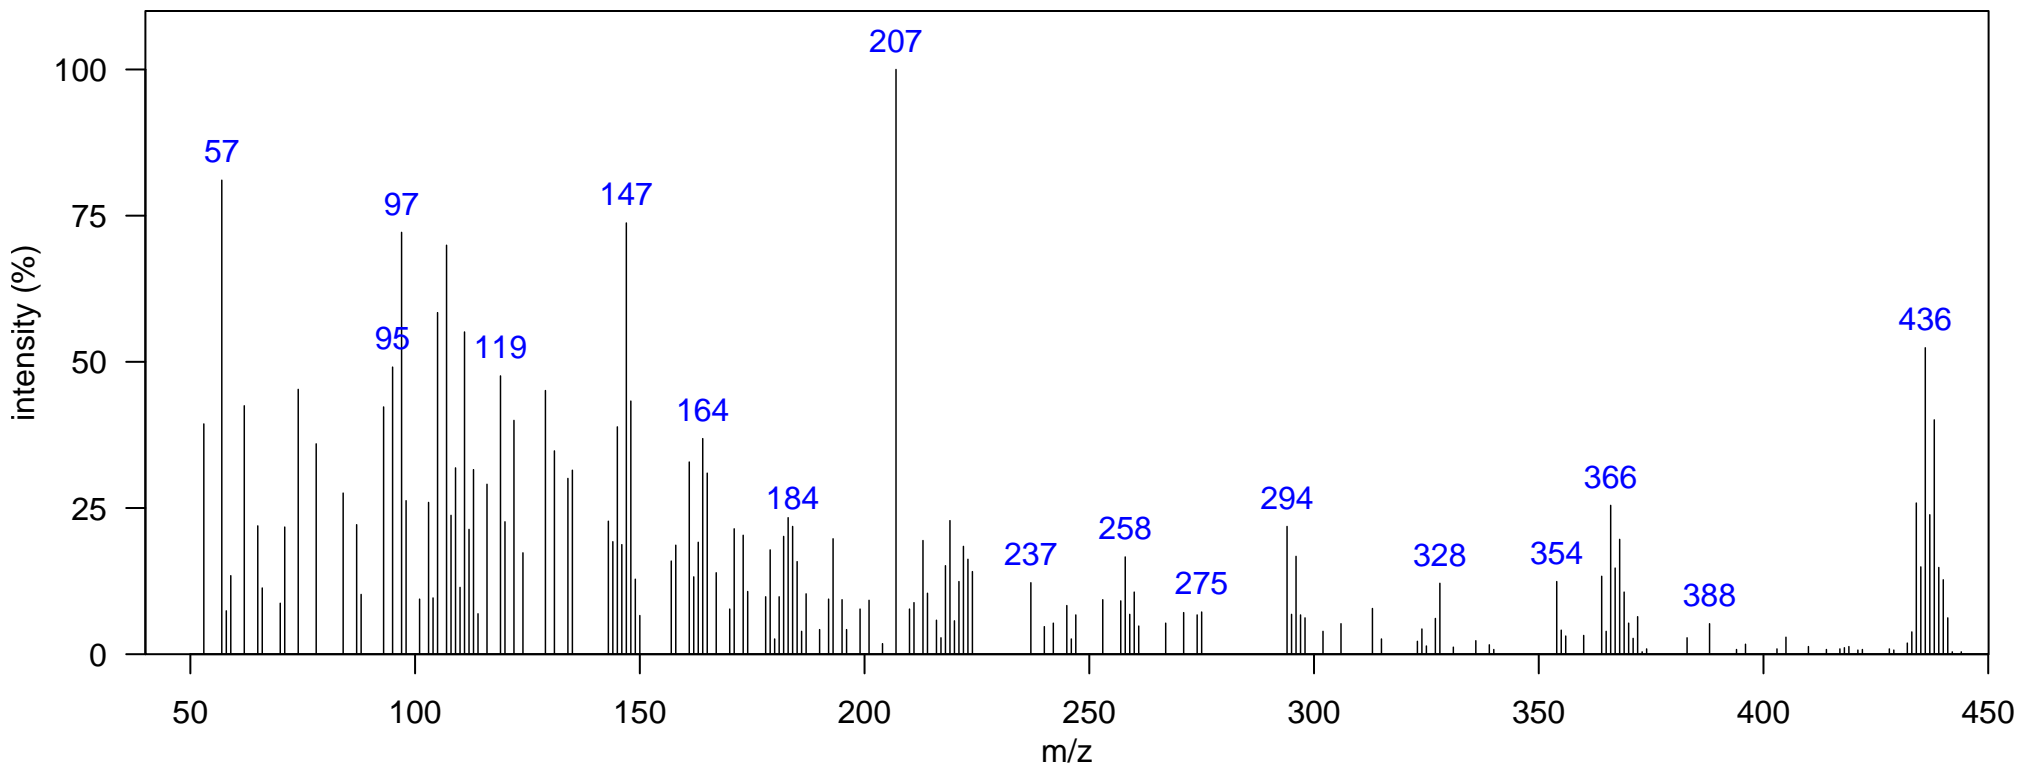

| m/z [Fragment]                        |
|---------------------------------------|
| 364 [M-Cl <sub>2</sub> ] <sup>+</sup> |
| 434 M <sup>+</sup>                    |

Name: terphenyl 6Cl 12

Class: PCT

Matrix: South Atlantic Dolphin Blubber  
In N. Atlantic: FALSE, In N. Pacific: FALSE  
Typically Monitored: FALSE  
Comment:

Instrument: GCxGC-TOF, EI, 70 eV  
1D RT, 2D RT (s): 1806.81, 1.485  
Quantitative Ion m/z: 438

Elemental Formula: C<sub>18</sub>H<sub>8</sub>Cl<sub>6</sub>  
Source: anthropogenic  
Identification: Manual-Congener Group

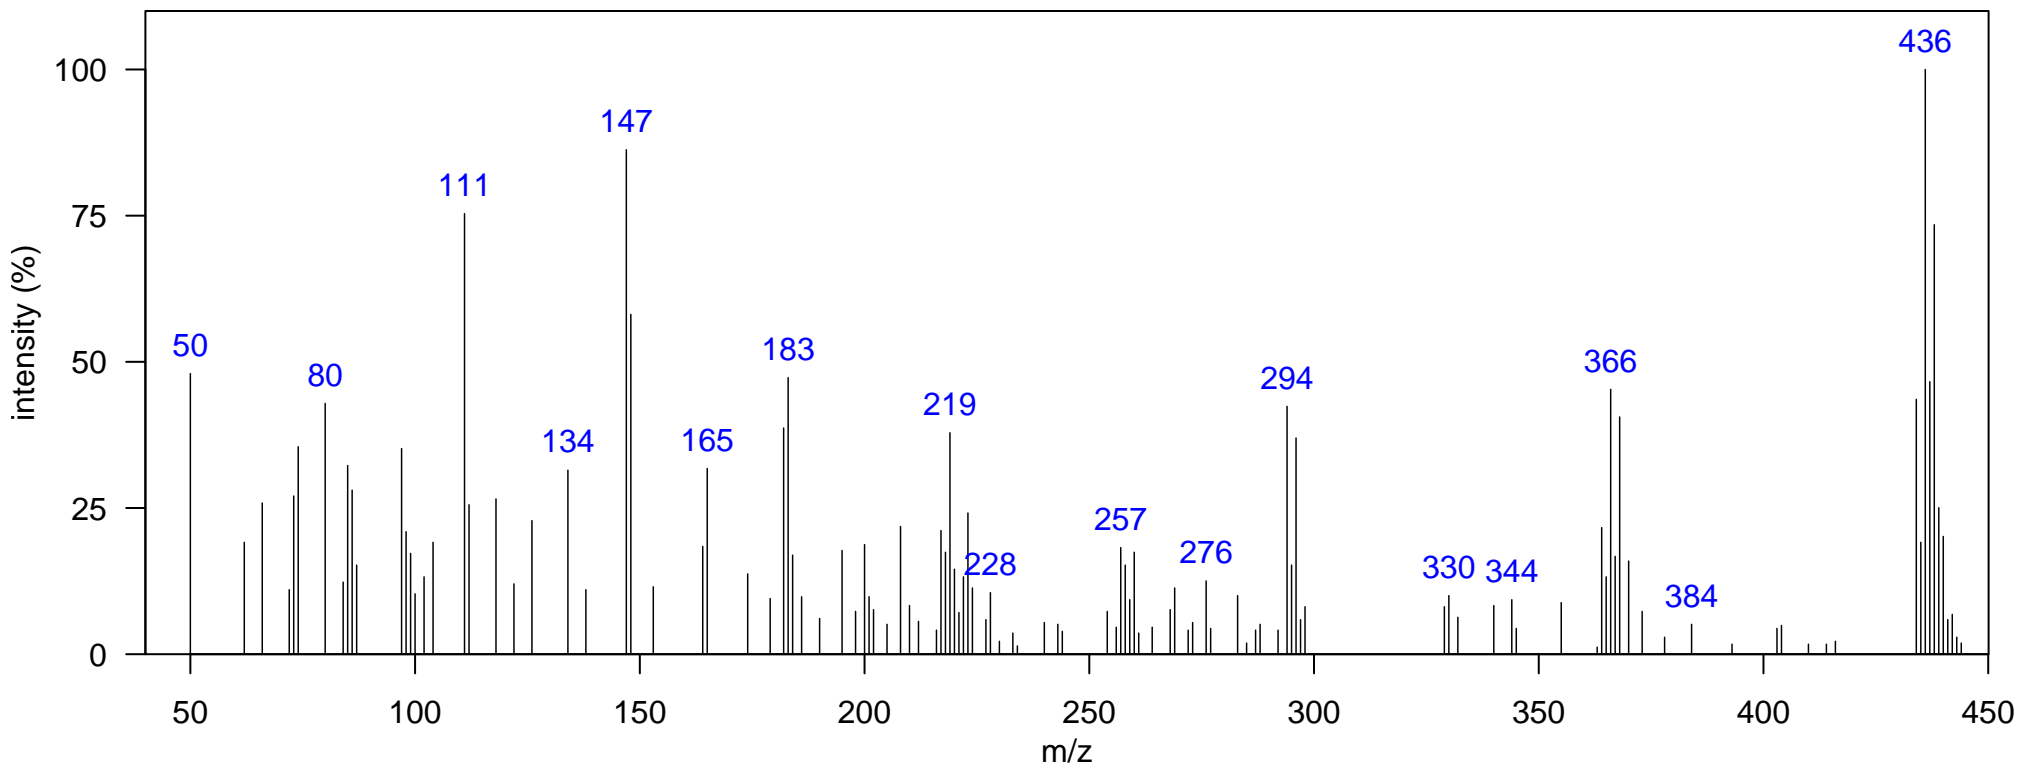

| m/z [Fragment]                        |
|---------------------------------------|
| 364 [M-Cl <sub>2</sub> ] <sup>+</sup> |
| 434 M <sup>+</sup>                    |

Name: terphenyl 6Cl 13

Class: PCT

Matrix: South Atlantic Dolphin Blubber  
In N. Atlantic: FALSE, In N. Pacific: FALSE  
Typically Monitored: FALSE  
Comment:

Instrument: GCxGC-TOF, EI, 70 eV  
1D RT, 2D RT (s): 1827.8, 1.637  
Quantitative Ion m/z: 438

Elemental Formula: C<sub>18</sub>H<sub>8</sub>Cl<sub>6</sub>  
Source: anthropogenic  
Identification: Manual-Congener Group

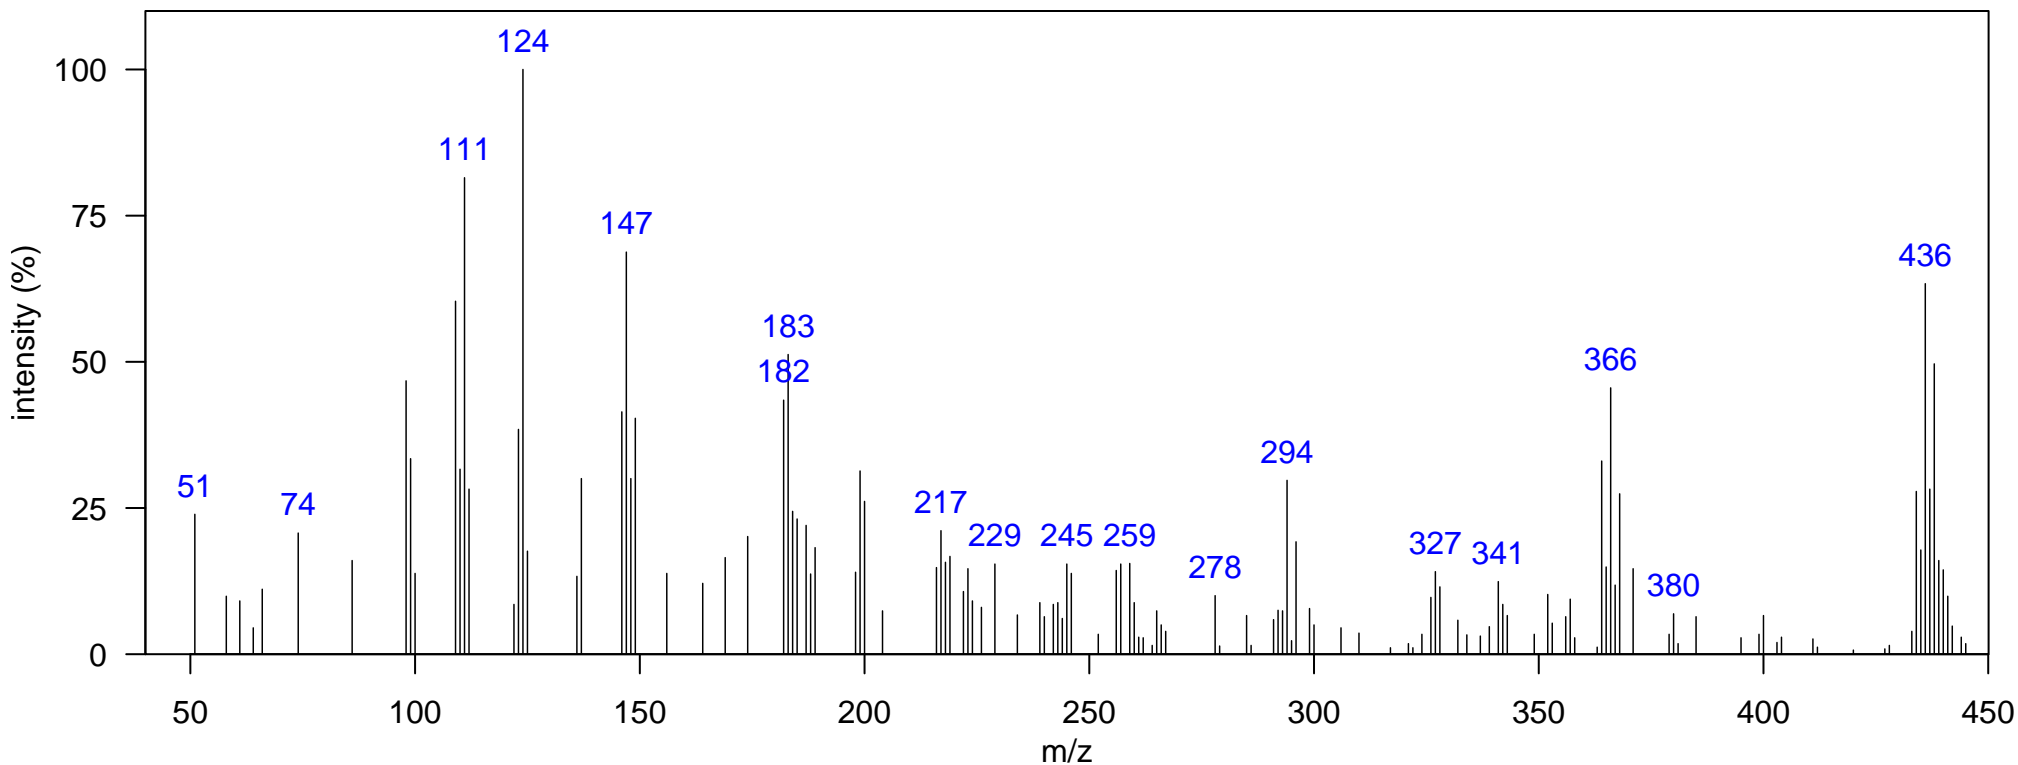

| m/z [Fragment]                        |
|---------------------------------------|
| 364 [M-Cl <sub>2</sub> ] <sup>+</sup> |
| 434 M <sup>+</sup>                    |

Name: terphenyl 6Cl 14

Class: PCT

Matrix: South Atlantic Dolphin Blubber  
In N. Atlantic: FALSE, In N. Pacific: TRUE  
Typically Monitored: FALSE  
Comment: terphenyl 6Cl 8 (Pacific Library)

Instrument: GCxGC-TOF, EI, 70 eV  
1D RT, 2D RT (s): 1838.29, 1.67  
Quantitative Ion m/z: 438

Elemental Formula: C<sub>18</sub>H<sub>8</sub>Cl<sub>6</sub>  
Source: anthropogenic  
Identification: Manual-Congener Group

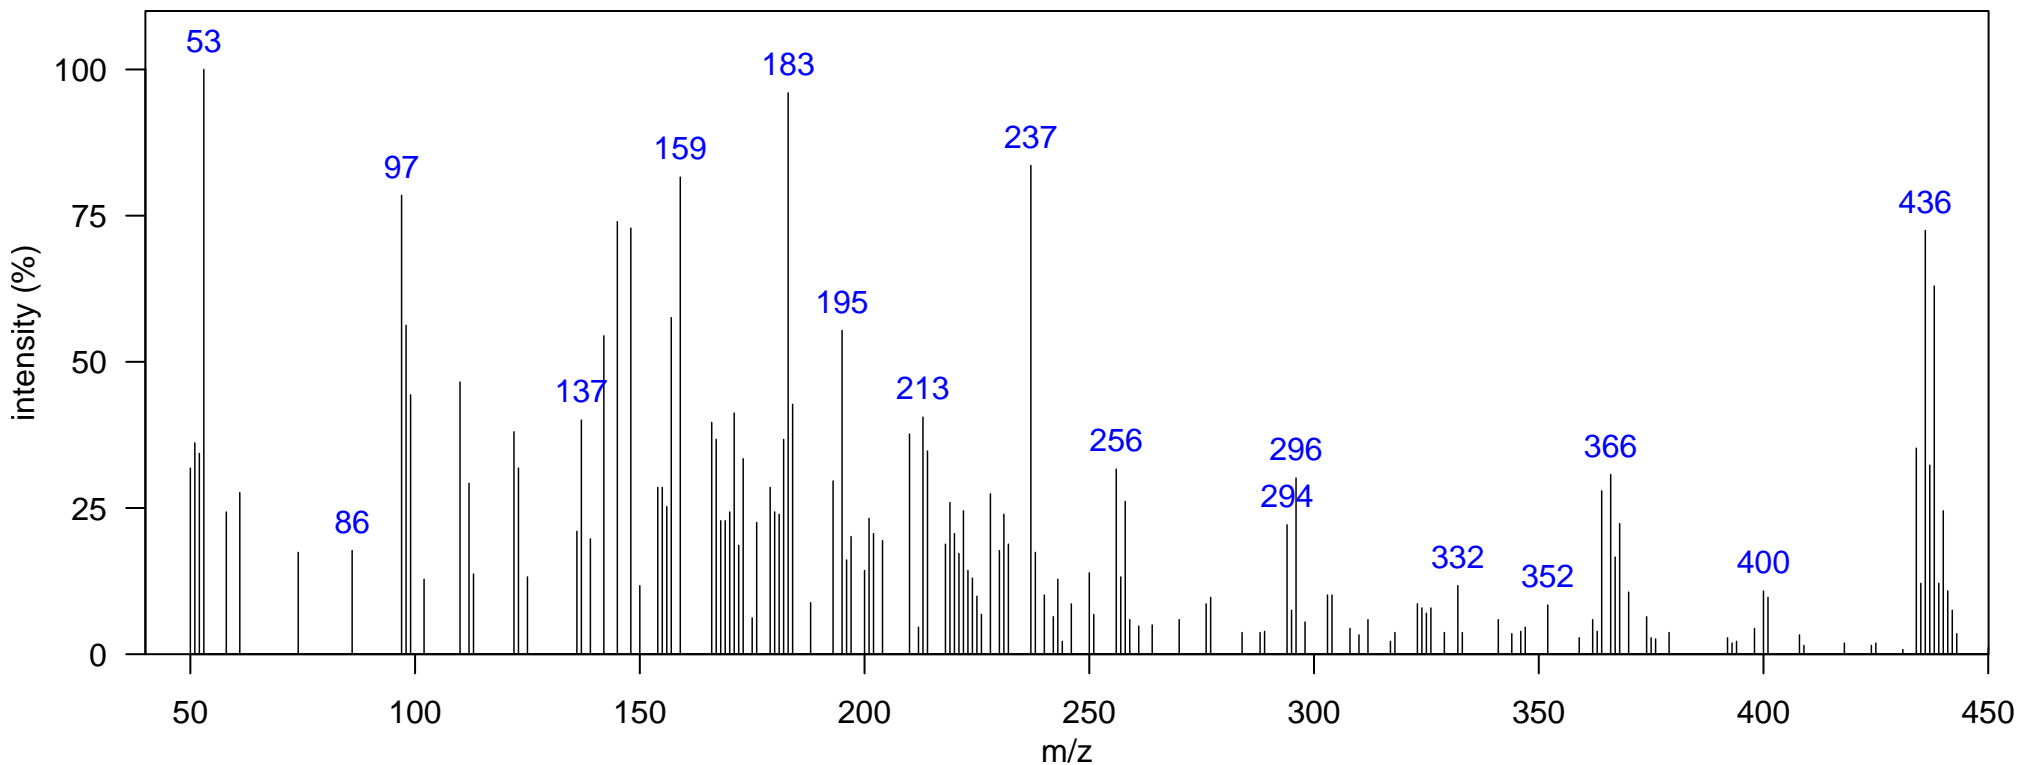

| m/z [Fragment]                        |
|---------------------------------------|
| 364 [M-Cl <sub>2</sub> ] <sup>+</sup> |
| 434 M <sup>+</sup>                    |

Name: terphenyl 7Cl 1

Class: PCT

Matrix: South Atlantic Dolphin Blubber  
In N. Atlantic: FALSE, In N. Pacific: TRUE  
Typically Monitored: FALSE  
Comment: terphenyl 7Cl 2 (Pacific Library)

Instrument: GCxGC-TOF, EI, 70 eV  
1D RT, 2D RT (s): 1785.82, 1.478  
Quantitative Ion m/z: 470

Elemental Formula: C<sub>18</sub>H<sub>7</sub>Cl<sub>7</sub>  
Source: anthropogenic  
Identification: Manual-Congener Group

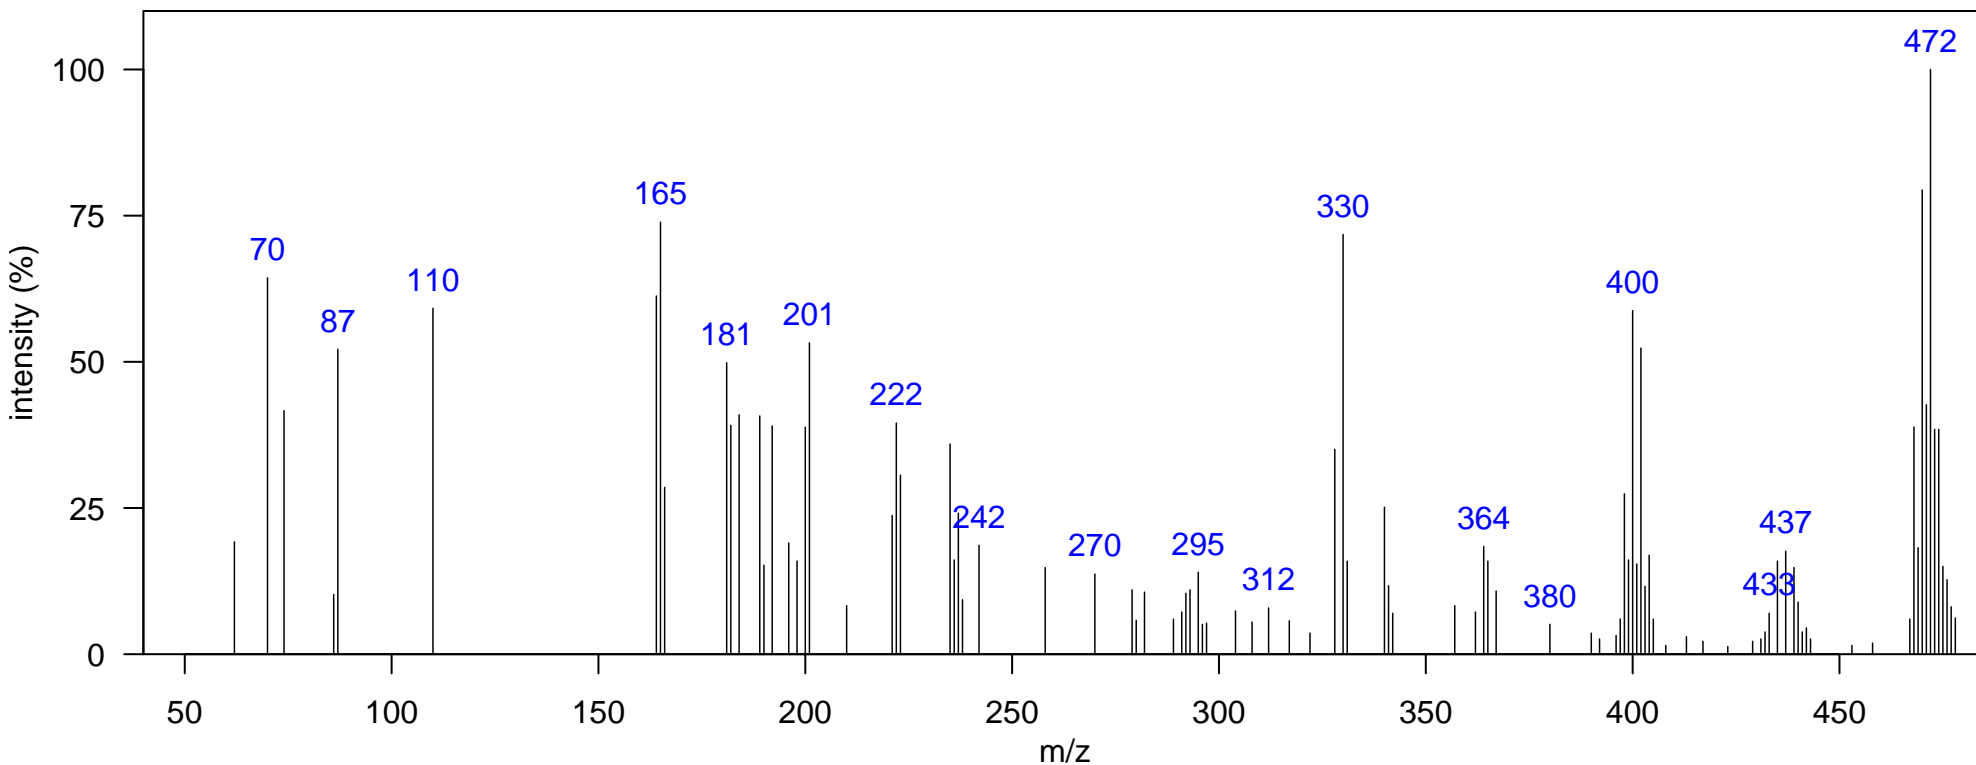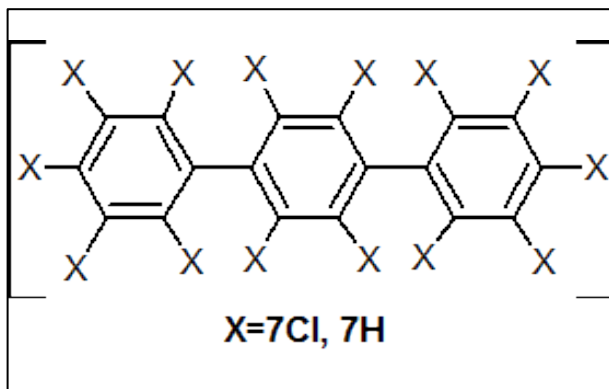

| m/z [Fragment]                        |
|---------------------------------------|
| 398 [M-Cl <sub>2</sub> ] <sup>+</sup> |
| 468 M <sup>+</sup>                    |

Name: terphenyl 7Cl 2

Class: PCT

Matrix: South Atlantic Dolphin Blubber  
In N. Atlantic: FALSE, In N. Pacific: FALSE  
Typically Monitored: FALSE  
Comment:

Instrument: GCxGC-TOF, EI, 70 eV  
1D RT, 2D RT (s): 1813.81, 1.584  
Quantitative Ion m/z: 470

Elemental Formula: C<sub>18</sub>H<sub>7</sub>Cl<sub>7</sub>  
Source: anthropogenic  
Identification: Manual-Congener Group

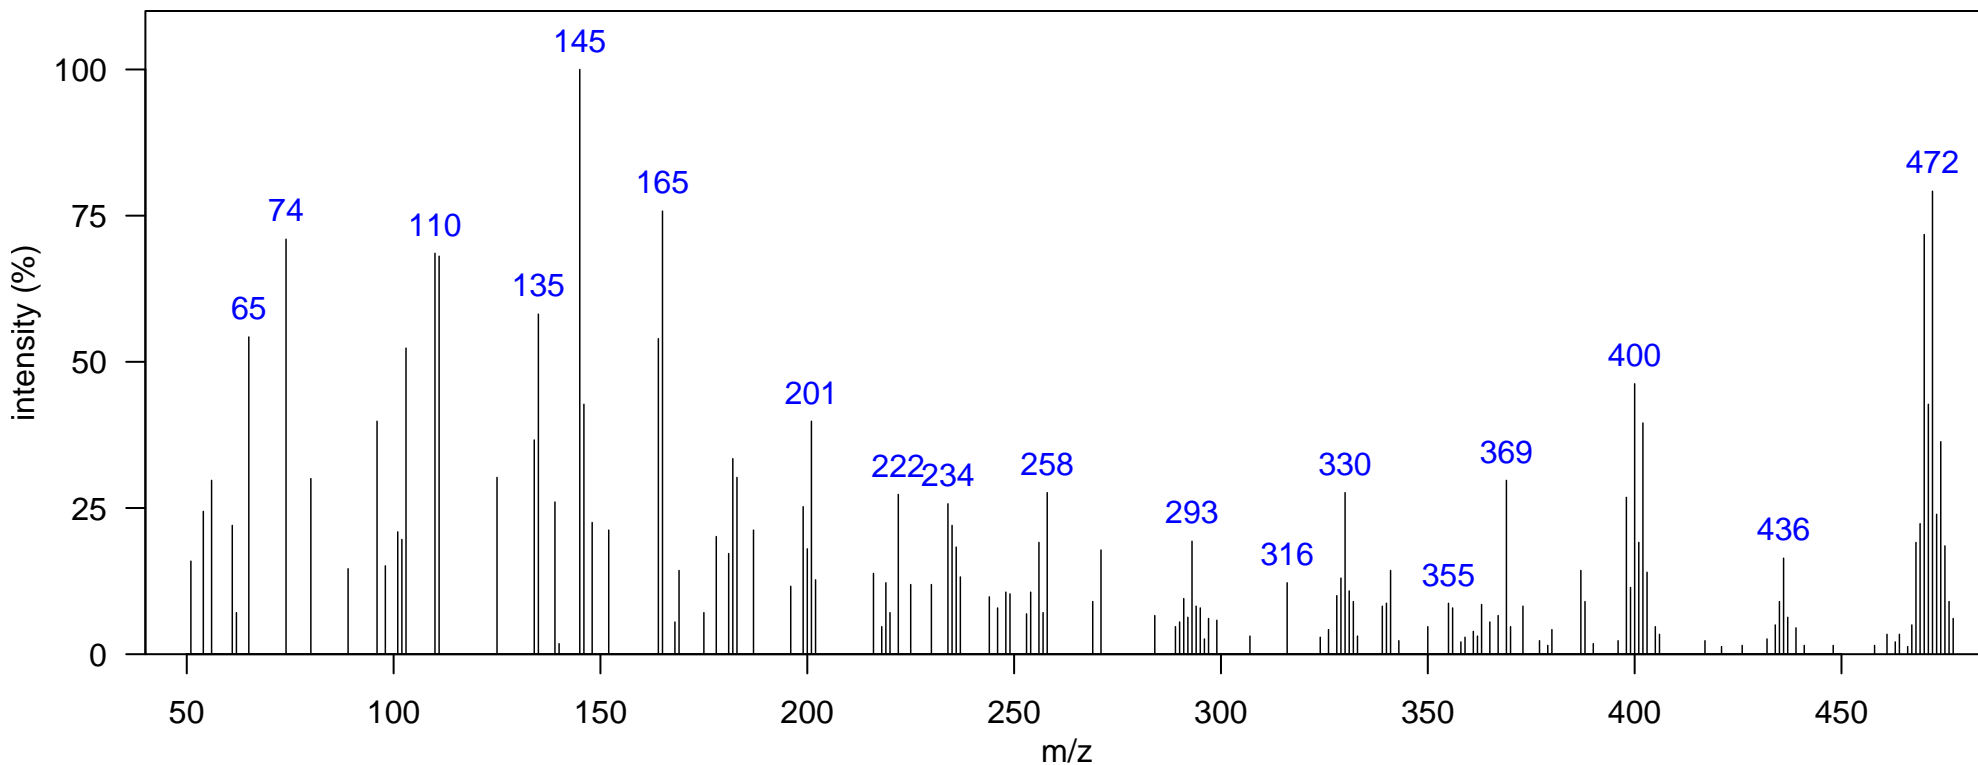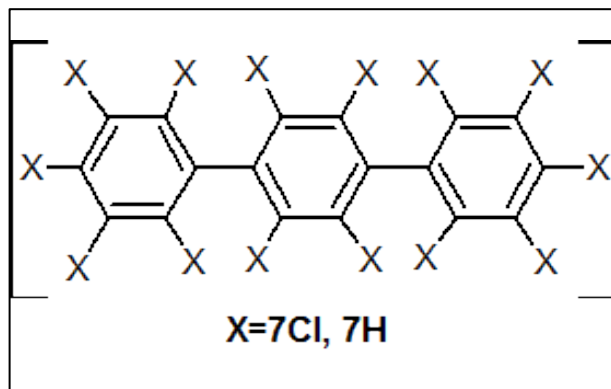

| m/z [Fragment]                        |
|---------------------------------------|
| 398 [M-Cl <sub>2</sub> ] <sup>+</sup> |
| 468 M <sup>+</sup>                    |

Name: terphenyl 7Cl 3

Class: PCT

Matrix: South Atlantic Dolphin Blubber  
In N. Atlantic: FALSE, In N. Pacific: TRUE  
Typically Monitored: FALSE  
Comment: terphenyl 7Cl 4 (Pacific Library)

Instrument: GCxGC-TOF, EI, 70 eV  
1D RT, 2D RT (s): 1820.8, 1.597  
Quantitative Ion m/z: 470

Elemental Formula: C<sub>18</sub>H<sub>7</sub>Cl<sub>7</sub>  
Source: anthropogenic  
Identification: Manual-Congener Group

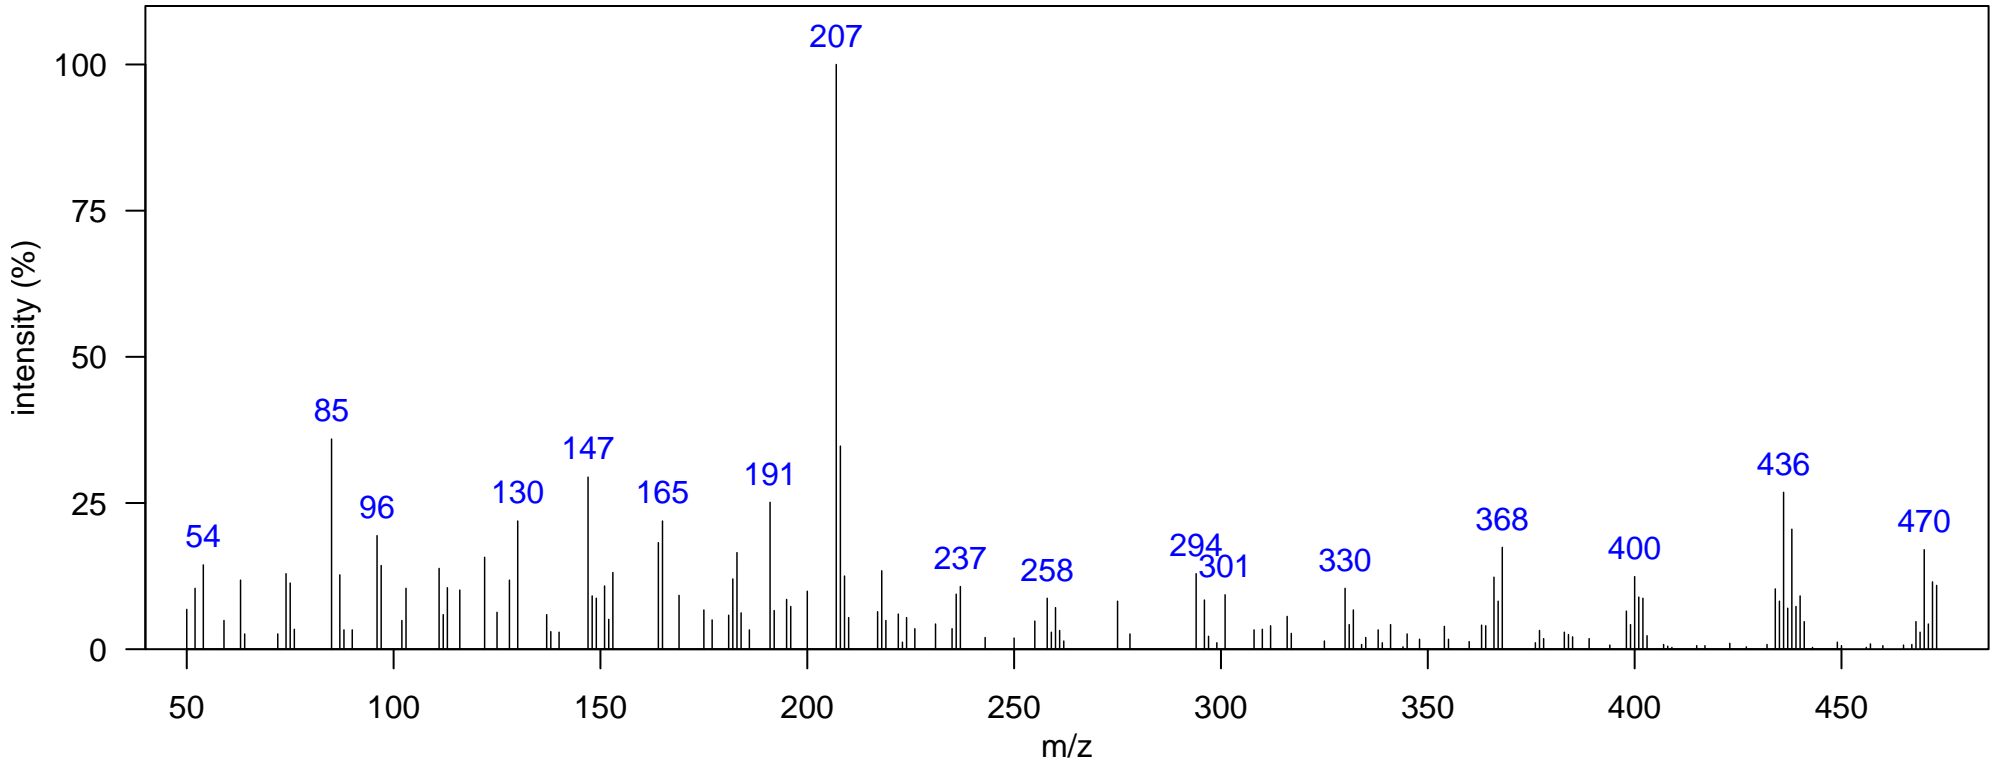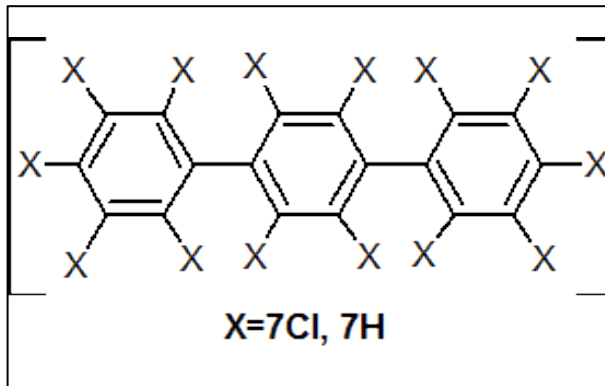

| m/z [Fragment]                        |
|---------------------------------------|
| 398 [M-Cl <sub>2</sub> ] <sup>+</sup> |
| 468 M <sup>+</sup>                    |



Name: terphenyl 7Cl 4

Class: PCT

Matrix: South Atlantic Dolphin Blubber  
In N. Atlantic: FALSE, In N. Pacific: TRUE  
Typically Monitored: FALSE  
Comment: terphenyl 7Cl 8 (Pacific Library)

Instrument: GCxGC-TOF, EI, 70 eV  
1D RT, 2D RT (s): 1887.26, 1.769  
Quantitative Ion m/z: 470

Elemental Formula: C<sub>18</sub>H<sub>7</sub>Cl<sub>7</sub>  
Source: anthropogenic  
Identification: Manual-Congener Group

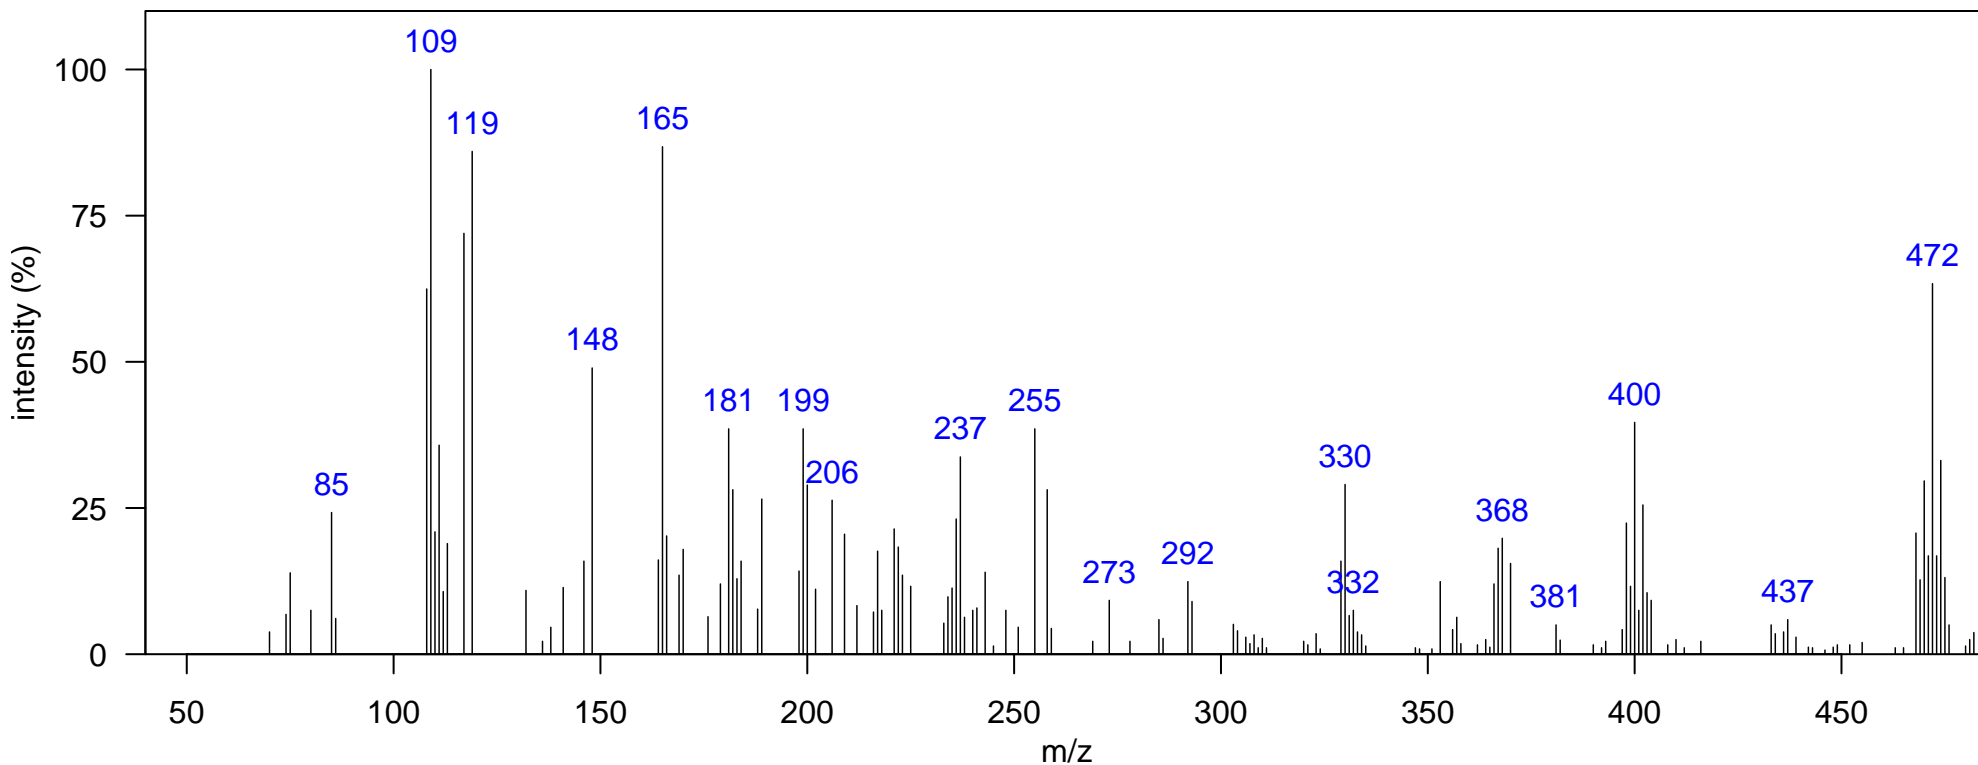

| m/z [Fragment]                        |
|---------------------------------------|
| 398 [M-Cl <sub>2</sub> ] <sup>+</sup> |
| 468 M <sup>+</sup>                    |

Name: terphenyl 7Cl 5

Class: PCT

Matrix: South Atlantic Dolphin Blubber  
In N. Atlantic: FALSE, In N. Pacific: TRUE  
Typically Monitored: FALSE  
Comment: terphenyl 7Cl 9 (Pacific Library)

Instrument: GCxGC-TOF, EI, 70 eV  
1D RT, 2D RT (s): 1890.76, 1.894  
Quantitative Ion m/z: 470

Elemental Formula: C<sub>18</sub>H<sub>7</sub>Cl<sub>7</sub>  
Source: anthropogenic  
Identification: Manual-Congener Group

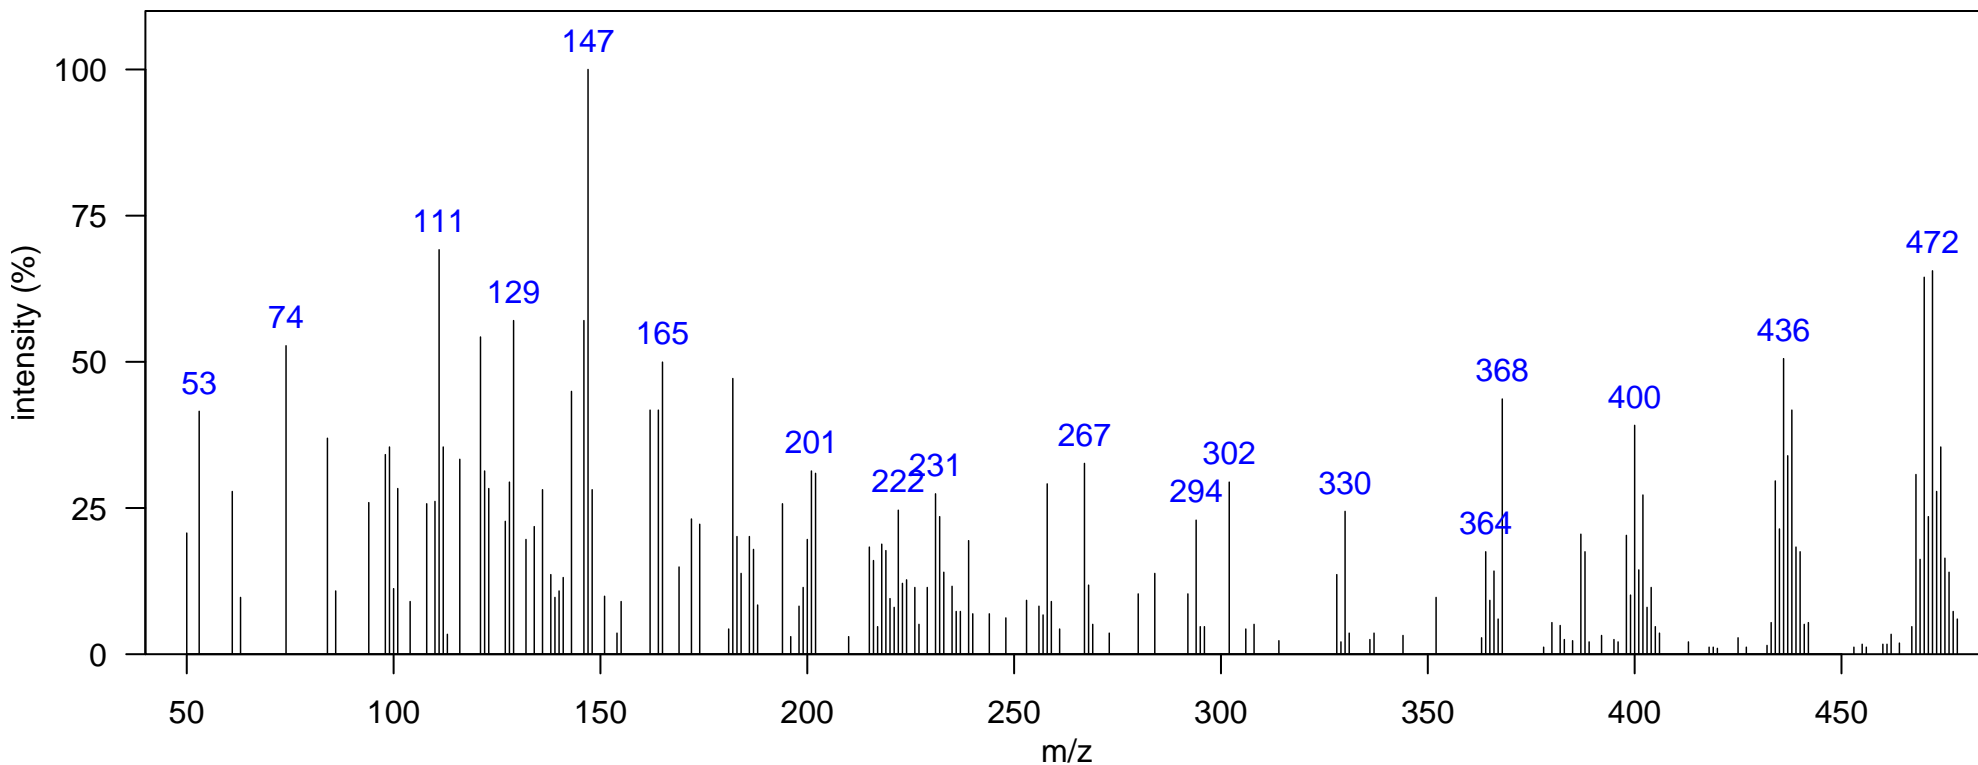

| m/z [Fragment]                        |
|---------------------------------------|
| 398 [M-Cl <sub>2</sub> ] <sup>+</sup> |
| 468 M <sup>+</sup>                    |

Name: methylsulfonylPCB 5Cl 1

Class: Methylsulfonyl-PCB

Matrix: South Atlantic Dolphin Blubber  
In N. Atlantic: FALSE, In N. Pacific: FALSE  
Typically Monitored: FALSE  
Comment: 2',4,4',5,5'-Pentachloro-2-methylsulfonylbiphenyl

Instrument: GCxGC-TOF, EI, 70 eV  
1D RT, 2D RT (s): 1491.99, 1.063  
Quantitative Ion m/z: 404

Elemental Formula: C<sub>13</sub>H<sub>7</sub>Cl<sub>5</sub>O<sub>2</sub>S  
Source: anthropogenic  
Identification: Reference Database MS

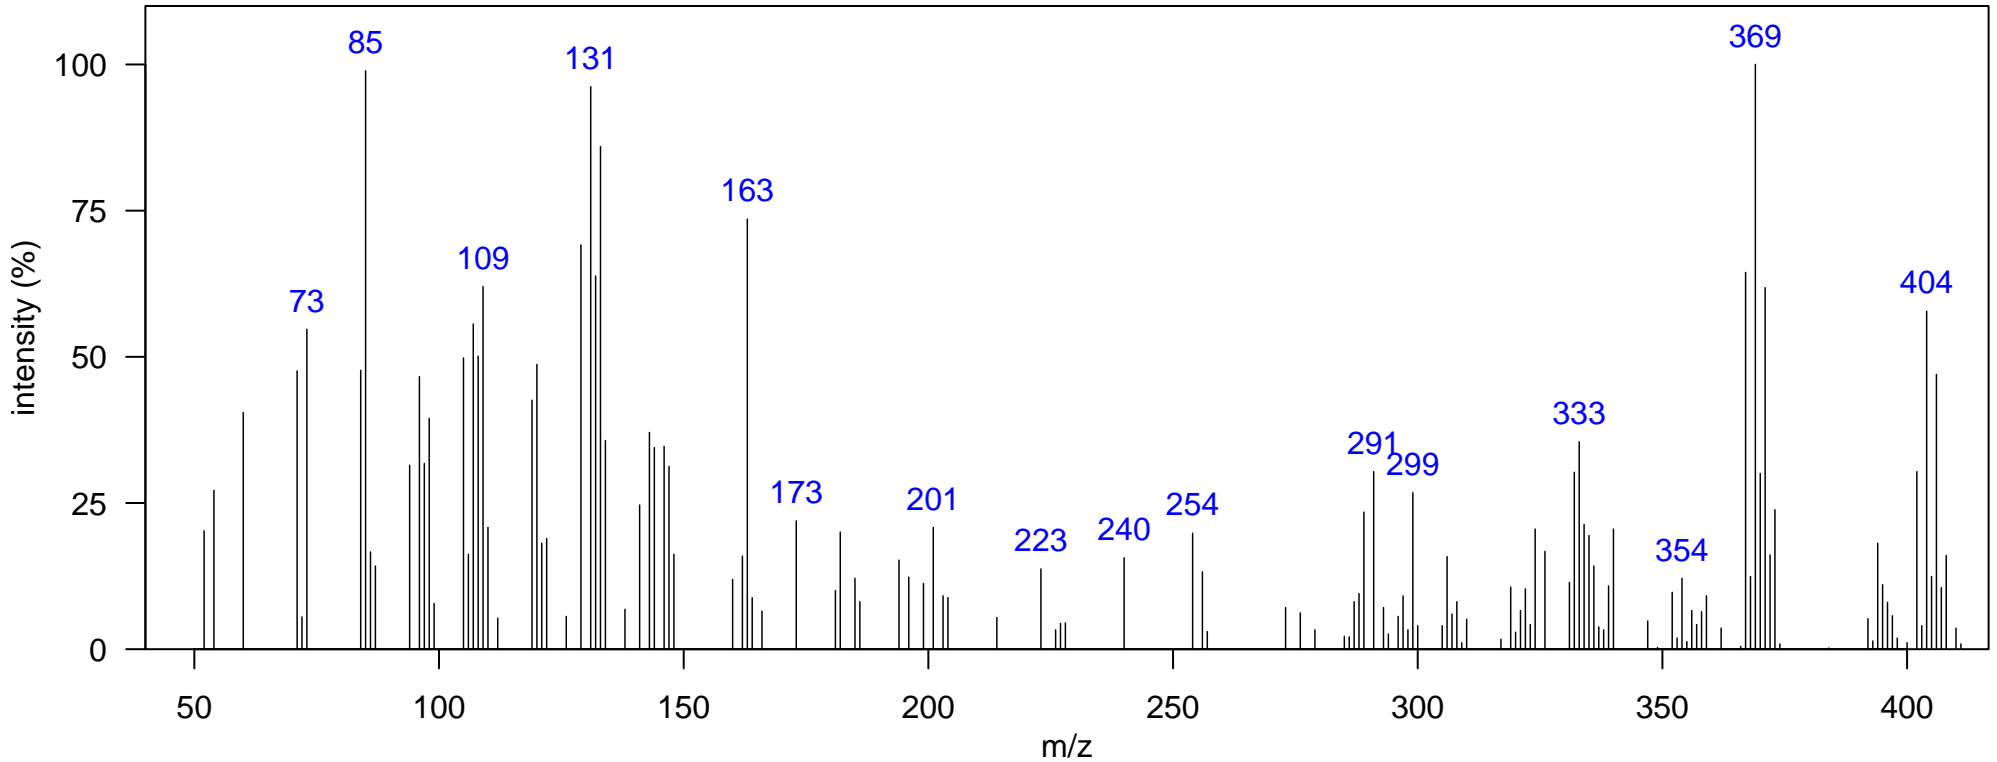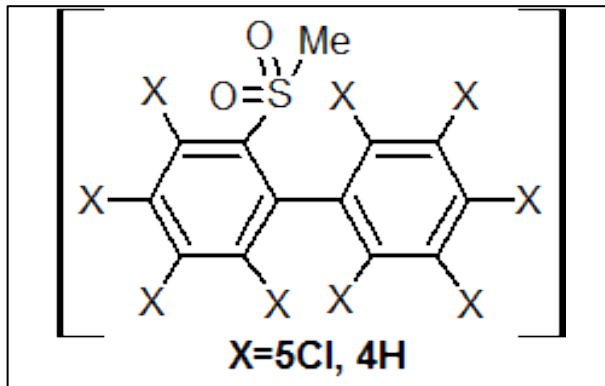

| m/z [Fragment]                                          |
|---------------------------------------------------------|
| 288 [M-SO <sub>2</sub> CH <sub>3</sub> Cl] <sup>+</sup> |
| 367 [M-CH <sub>2</sub> SO] <sup>+</sup>                 |
| 402 M <sup>+</sup>                                      |

Name: methylsulfonylPCB-101

Class: Methylsulfonyl-PCB

Matrix: South Atlantic Dolphin Blubber  
In N. Atlantic: FALSE, In N. Pacific: TRUE  
Typically Monitored: FALSE  
Comment:

Instrument: GCxGC-TOF, EI, 70 eV  
1D RT, 2D RT (s): 1687.88, 1.597  
Quantitative Ion m/z: 404

Elemental Formula: C<sub>13</sub>H<sub>7</sub>Cl<sub>5</sub>O<sub>2</sub>S  
Source: anthropogenic  
Identification: Authentic MS RT

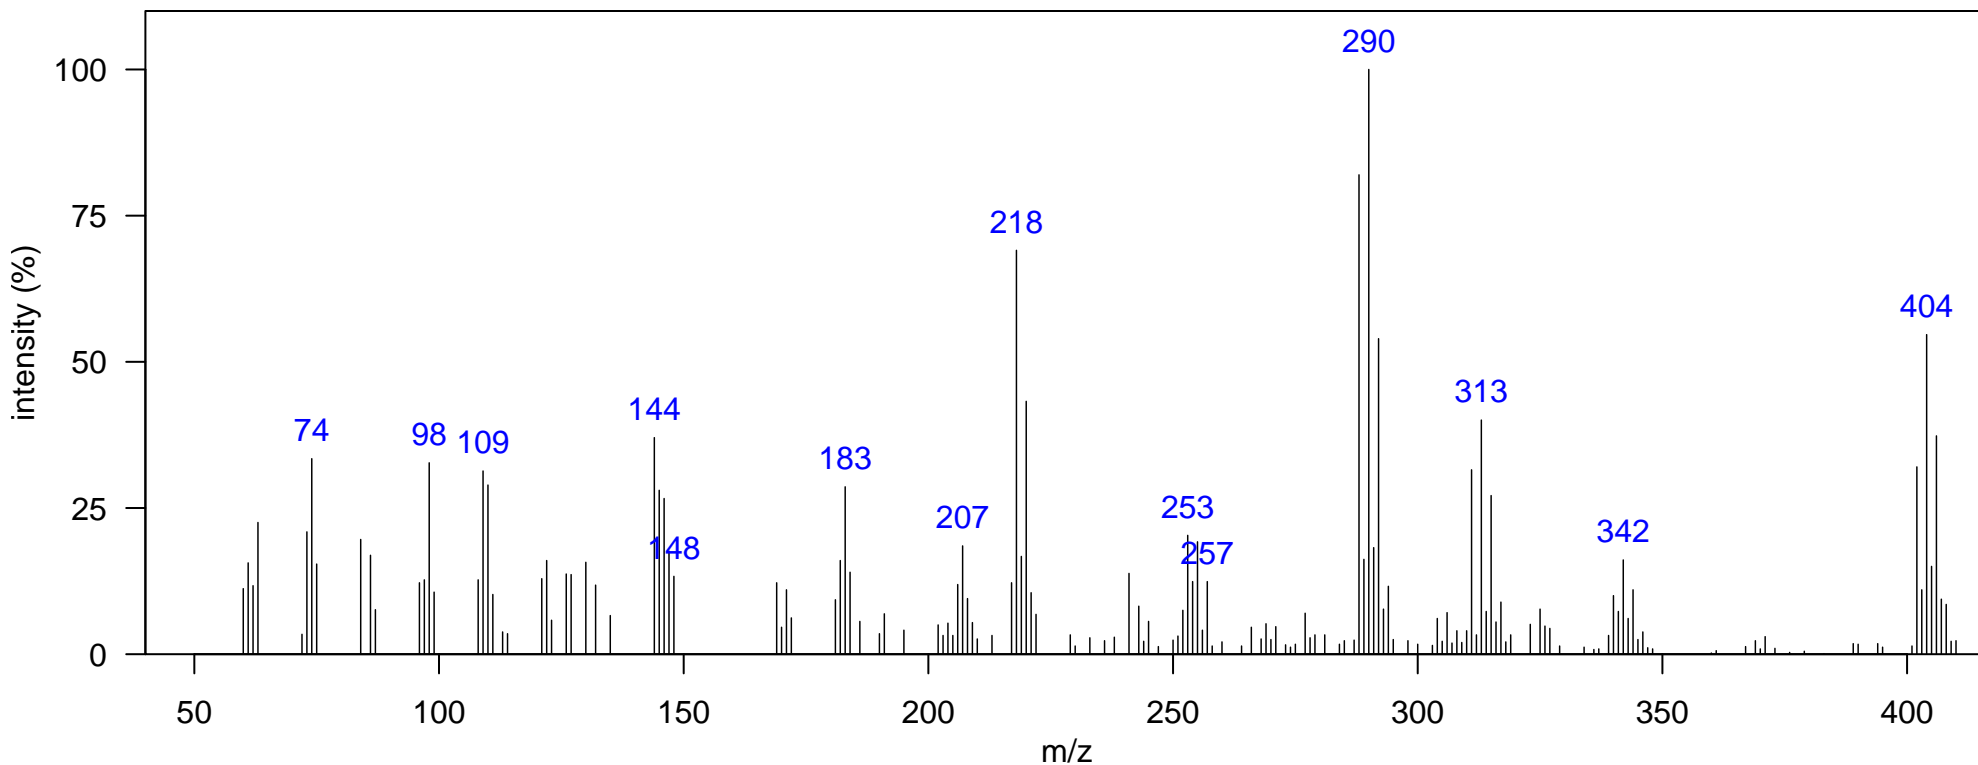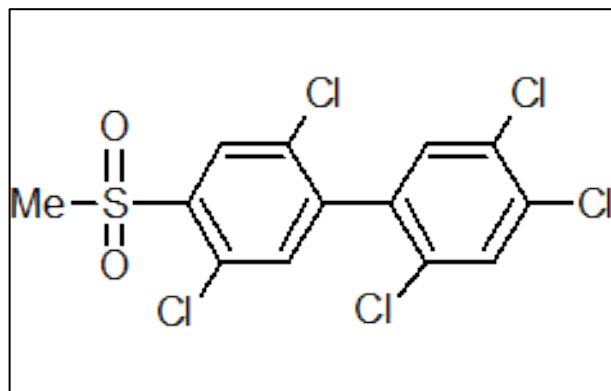

| m/z [Fragment]                                          |
|---------------------------------------------------------|
| 288 [M-SO <sub>2</sub> CH <sub>3</sub> Cl] <sup>+</sup> |
| 340 [M-CH <sub>2</sub> SO] <sup>+</sup>                 |
| 402 M <sup>+</sup>                                      |

Name: methylsulfonylPCB 5Cl 2

Class: Methylsulfonyl-PCB

Matrix: South Atlantic Dolphin Blubber  
In N. Atlantic: FALSE, In N. Pacific: TRUE  
Typically Monitored: FALSE  
Comment: methylsulfonylPCB 5Cl 1 (Pacific Library)

Instrument: GCxGC-TOF, EI, 70 eV  
1D RT, 2D RT (s): 1708.87, 1.584  
Quantitative Ion m/z: 404

Elemental Formula: C<sub>13</sub>H<sub>7</sub>Cl<sub>5</sub>O<sub>2</sub>S  
Source: anthropogenic  
Identification: Authentic MS

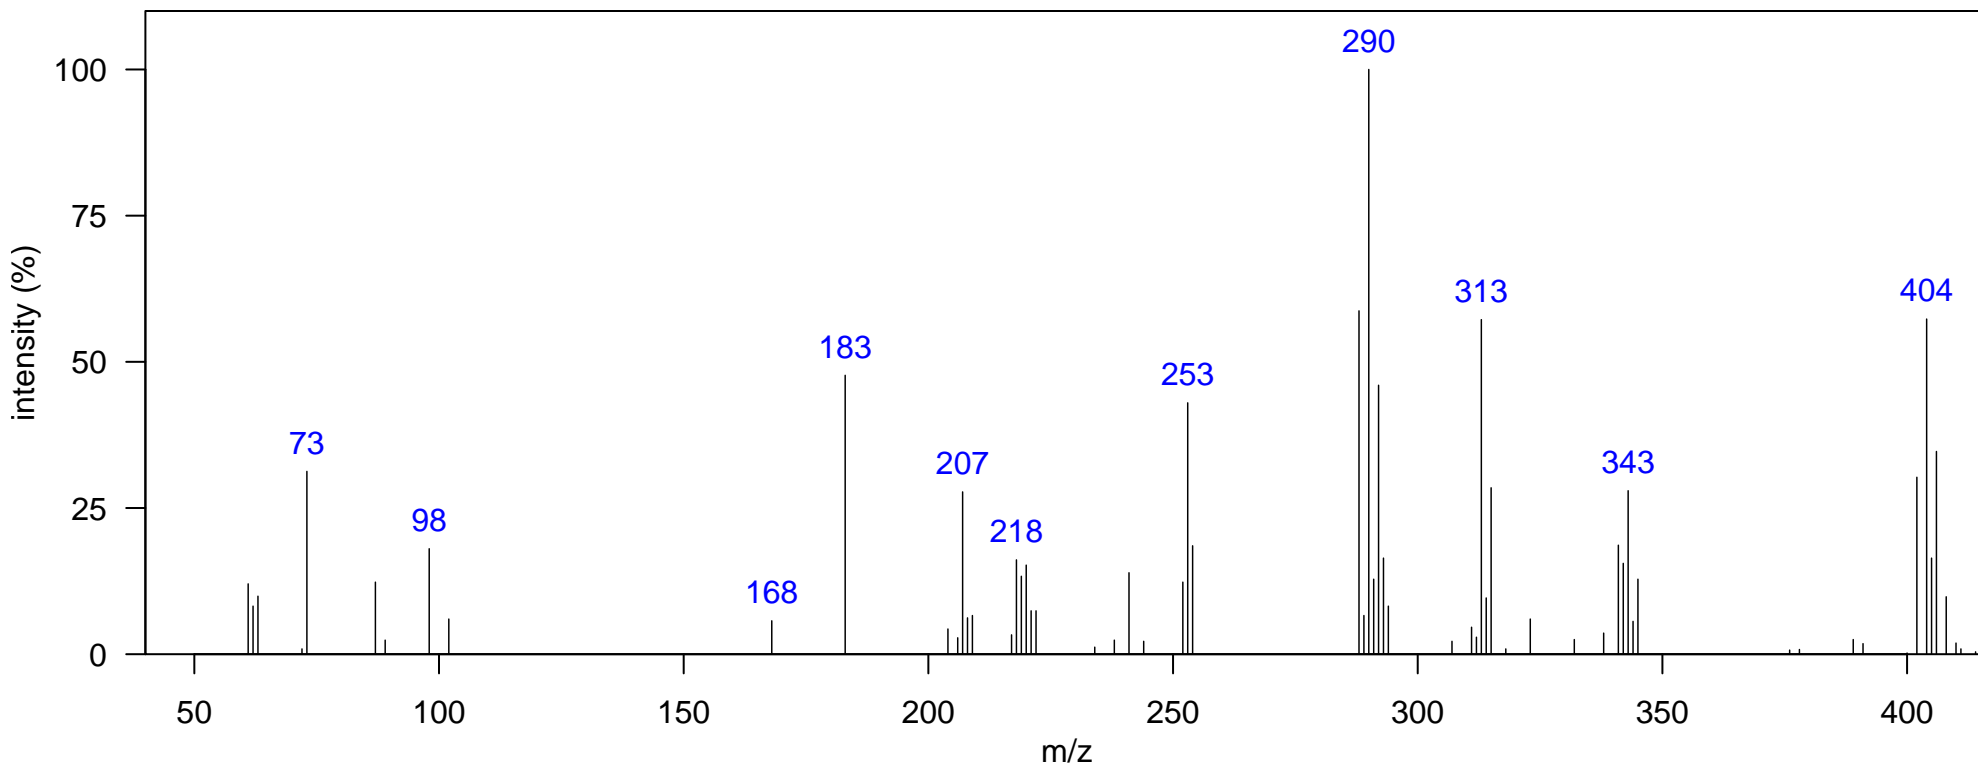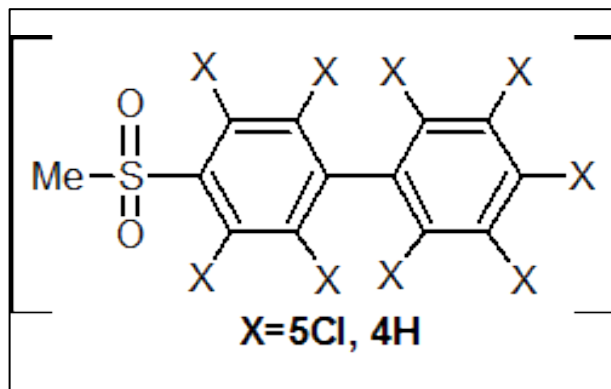

| m/z [Fragment]                                          |
|---------------------------------------------------------|
| 288 [M-SO <sub>2</sub> CH <sub>3</sub> Cl] <sup>+</sup> |
| 340 [M-CH <sub>2</sub> SO] <sup>+</sup>                 |
| 402 M <sup>+</sup>                                      |

Name: methylsulfonylPCB 5Cl 3

Class: Methylsulfonyl-PCB

Matrix: South Atlantic Dolphin Blubber  
In N. Atlantic: FALSE, In N. Pacific: TRUE  
Typically Monitored: FALSE  
Comment: methylsulfonylPCB 5Cl 2 (Pacific Library)

Instrument: GCxGC-TOF, EI, 70 eV  
1D RT, 2D RT (s): 1729.85, 1.61  
Quantitative Ion m/z: 404

Elemental Formula: C<sub>13</sub>H<sub>7</sub>Cl<sub>5</sub>O<sub>2</sub>S  
Source: anthropogenic  
Identification: Authentic MS

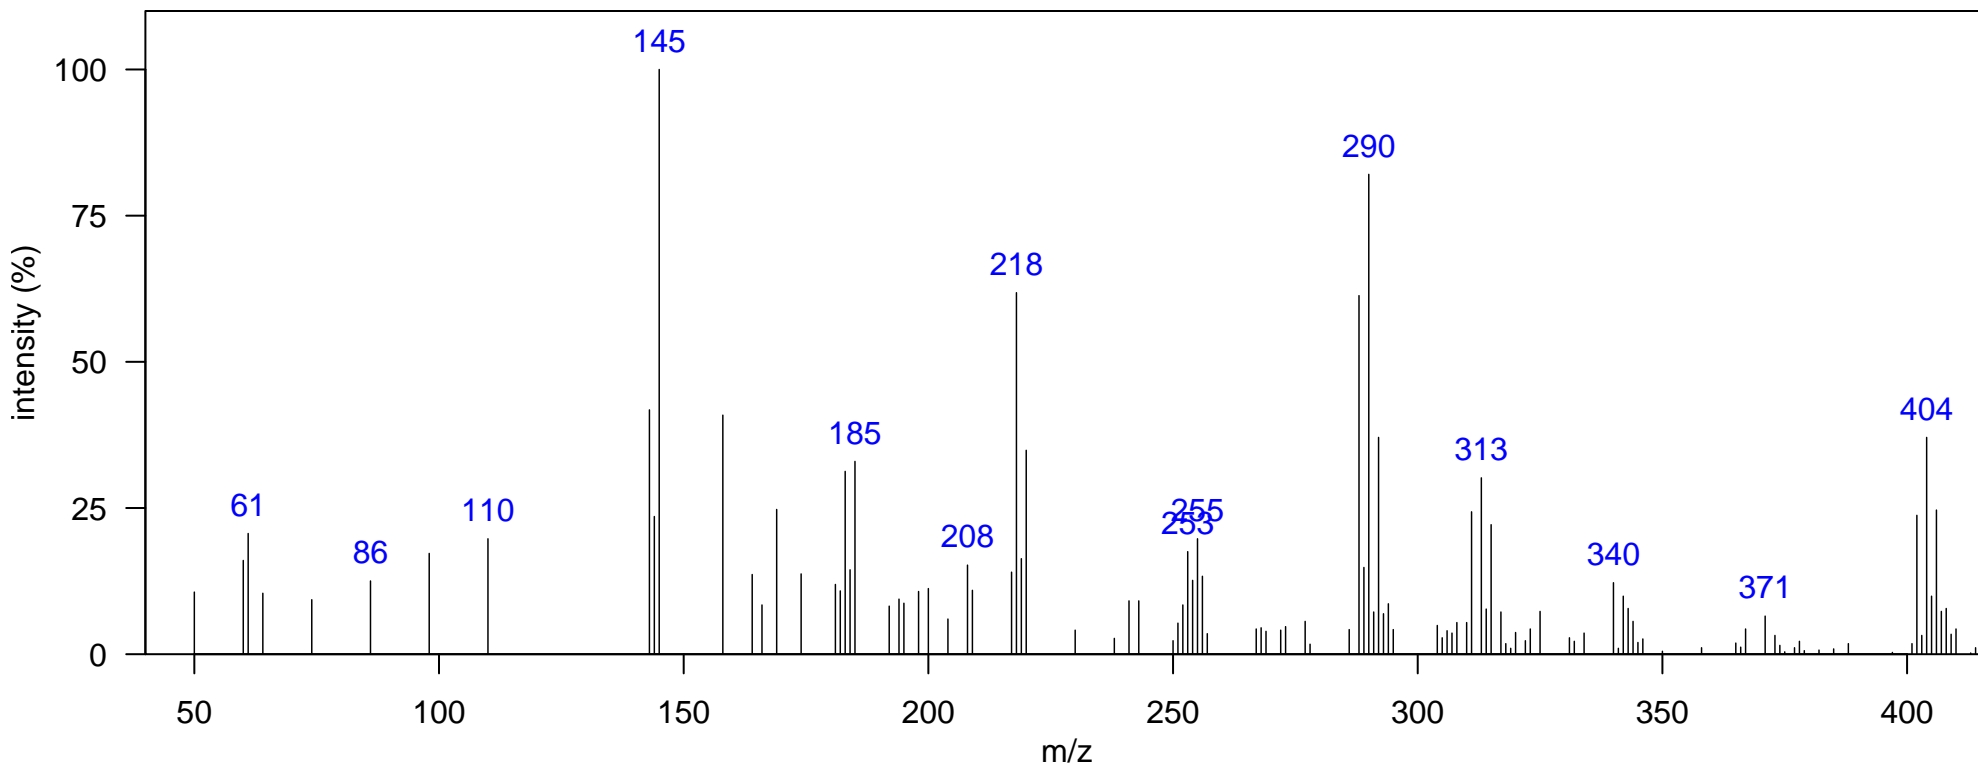

| m/z [Fragment]                                          |
|---------------------------------------------------------|
| 288 [M-SO <sub>2</sub> CH <sub>3</sub> Cl] <sup>+</sup> |
| 340 [M-CH <sub>2</sub> SO] <sup>+</sup>                 |
| 402 M <sup>+</sup>                                      |

Name: 1,2,4-trichlorobenzene

Class: Chlorinated benzene

Matrix: South Atlantic Dolphin Blubber  
In N. Atlantic: FALSE, In N. Pacific: TRUE  
Typically Monitored: FALSE  
Comment:

Instrument: GCxGC-TOF, EI, 70 eV  
1D RT, 2D RT (s): 687.45, 0.772  
Quantitative Ion m/z: 182

Elemental Formula: C<sub>6</sub>H<sub>3</sub>Cl<sub>3</sub>  
Source: anthropogenic  
Identification: Authentic MS RT

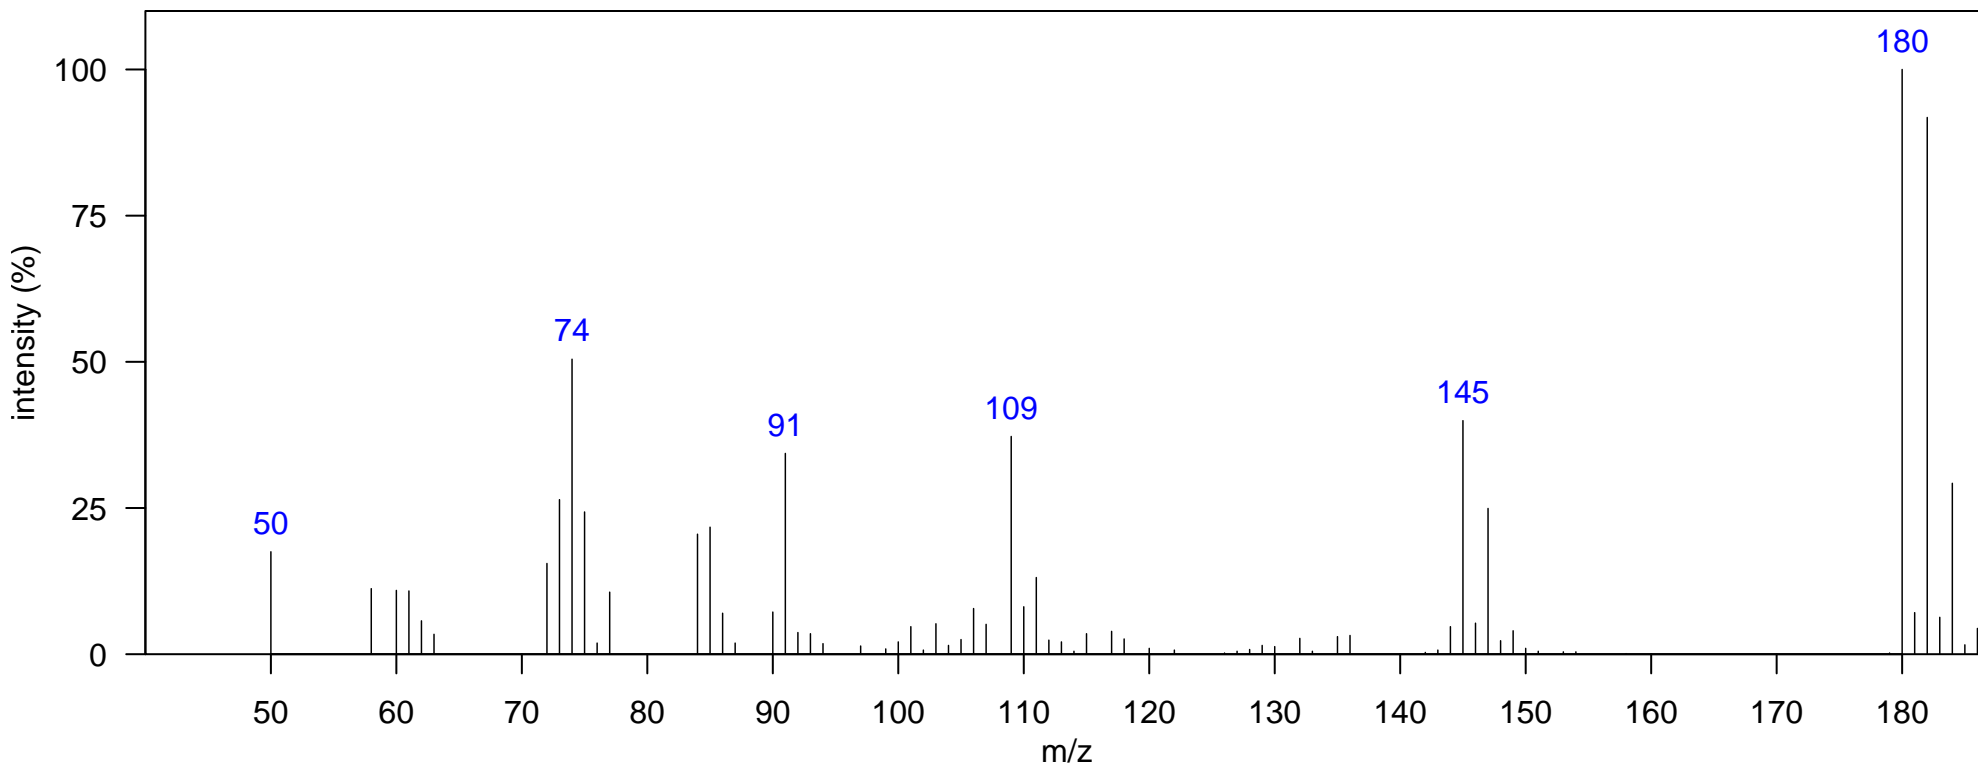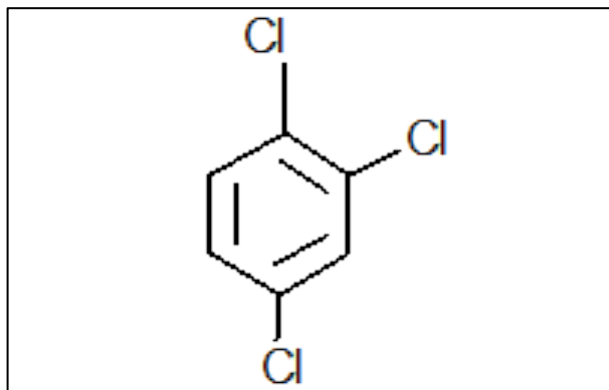

| m/z [Fragment]          |
|-------------------------|
| 145 [M-Cl] <sup>+</sup> |
| 180 M <sup>+</sup>      |

Name: tetrachlorobenzene

Class: Chlorinated benzene

Matrix: South Atlantic Dolphin Blubber  
In N. Atlantic: FALSE, In N. Pacific: TRUE  
Typically Monitored: FALSE  
Comment:

Instrument: GCxGC-TOF, EI, 70 eV  
1D RT, 2D RT (s): 820.374, 0.792  
Quantitative Ion m/z: 216

Elemental Formula: C<sub>6</sub>H<sub>2</sub>Cl<sub>4</sub>  
Source: anthropogenic  
Identification: Authentic MS

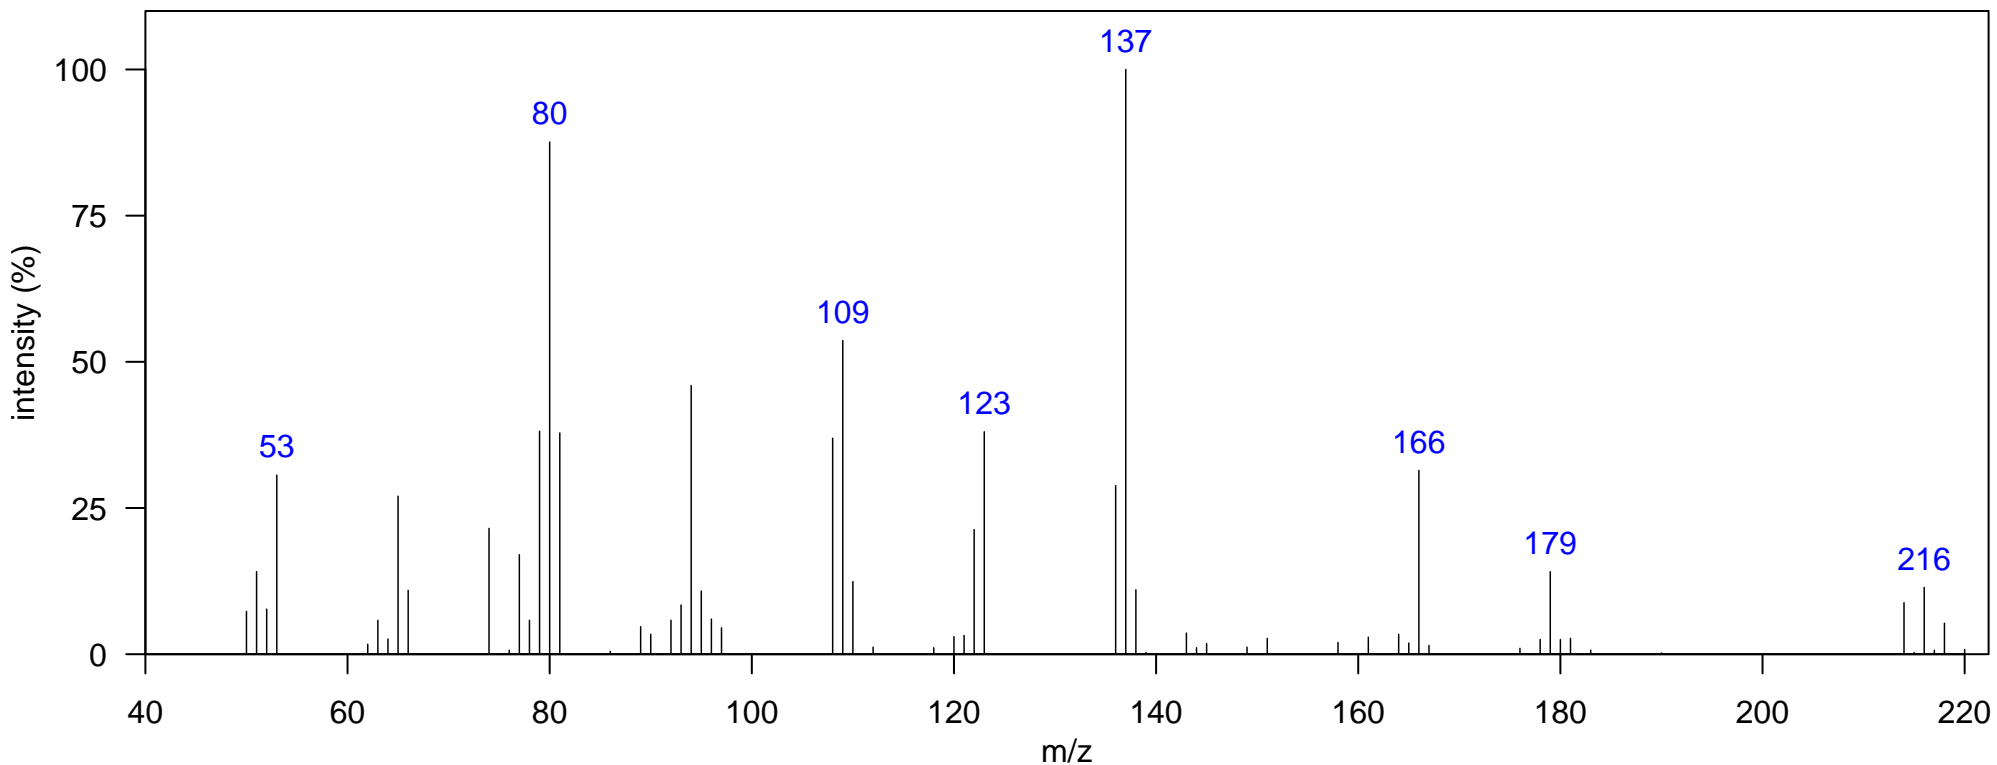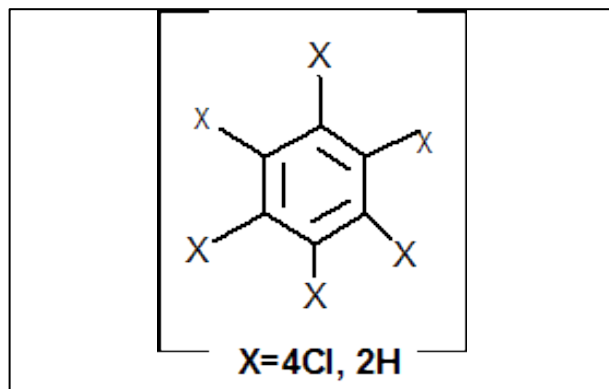

| m/z [Fragment]          |
|-------------------------|
| 179 [M-Cl] <sup>+</sup> |
| 214 M <sup>+</sup>      |



Name: hexachlorobenzene

Class: Chlorinated benzene

Matrix: South Atlantic Dolphin Blubber  
In N. Atlantic: TRUE, In N. Pacific: TRUE  
Typically Monitored: TRUE  
Comment:

Instrument: GCxGC-TOF, EI, 70 eV  
1D RT, 2D RT (s): 1100.21, 0.878  
Quantitative Ion m/z: 284

Elemental Formula: C<sub>6</sub>Cl<sub>6</sub>  
Source: anthropogenic  
Identification: Authentic MS RT

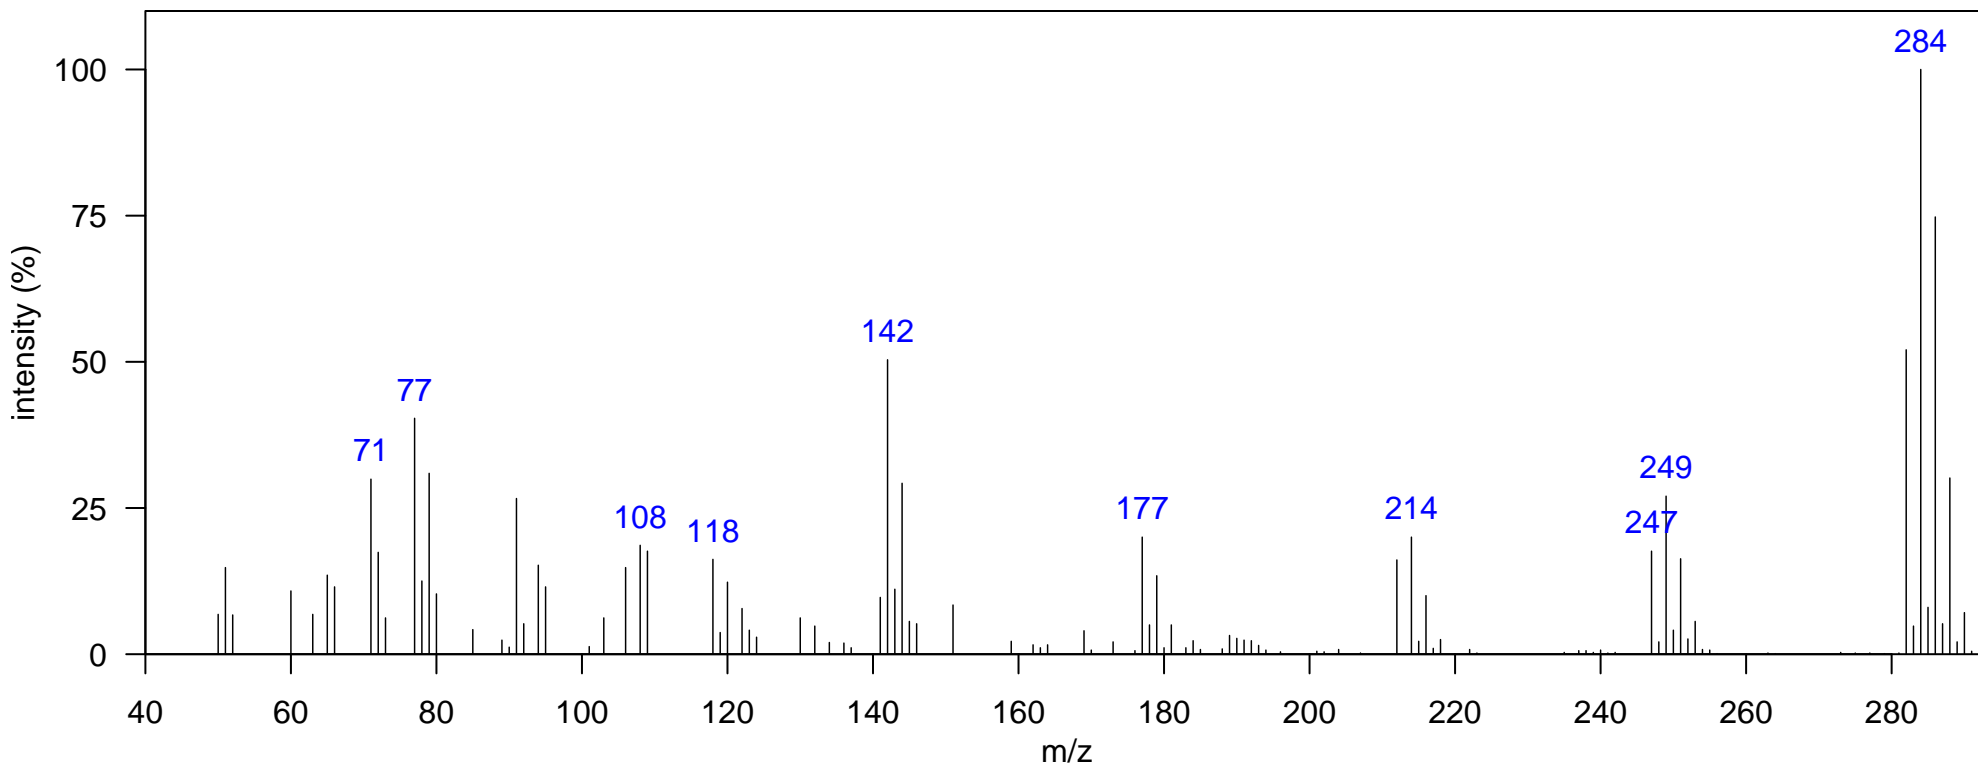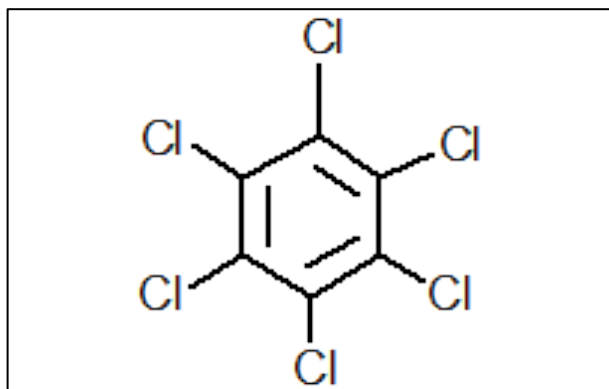

| m/z [Fragment]          |
|-------------------------|
| 247 [M-Cl] <sup>+</sup> |
| 282 M <sup>+</sup>      |

Name: beta HCH

Class: HCH-related

Matrix: South Atlantic Dolphin Blubber  
In N. Atlantic: FALSE, In N. Pacific: TRUE  
Typically Monitored: TRUE  
Comment: beta BHC (Pacific Library)

Instrument: GCxGC-TOF, EI, 70 eV  
1D RT, 2D RT (s): 1124.7, 1.01  
Quantitative Ion m/z: 219

Elemental Formula: C<sub>6</sub>H<sub>6</sub>Cl<sub>6</sub>  
Source: anthropogenic  
Identification: Authentic MS RT

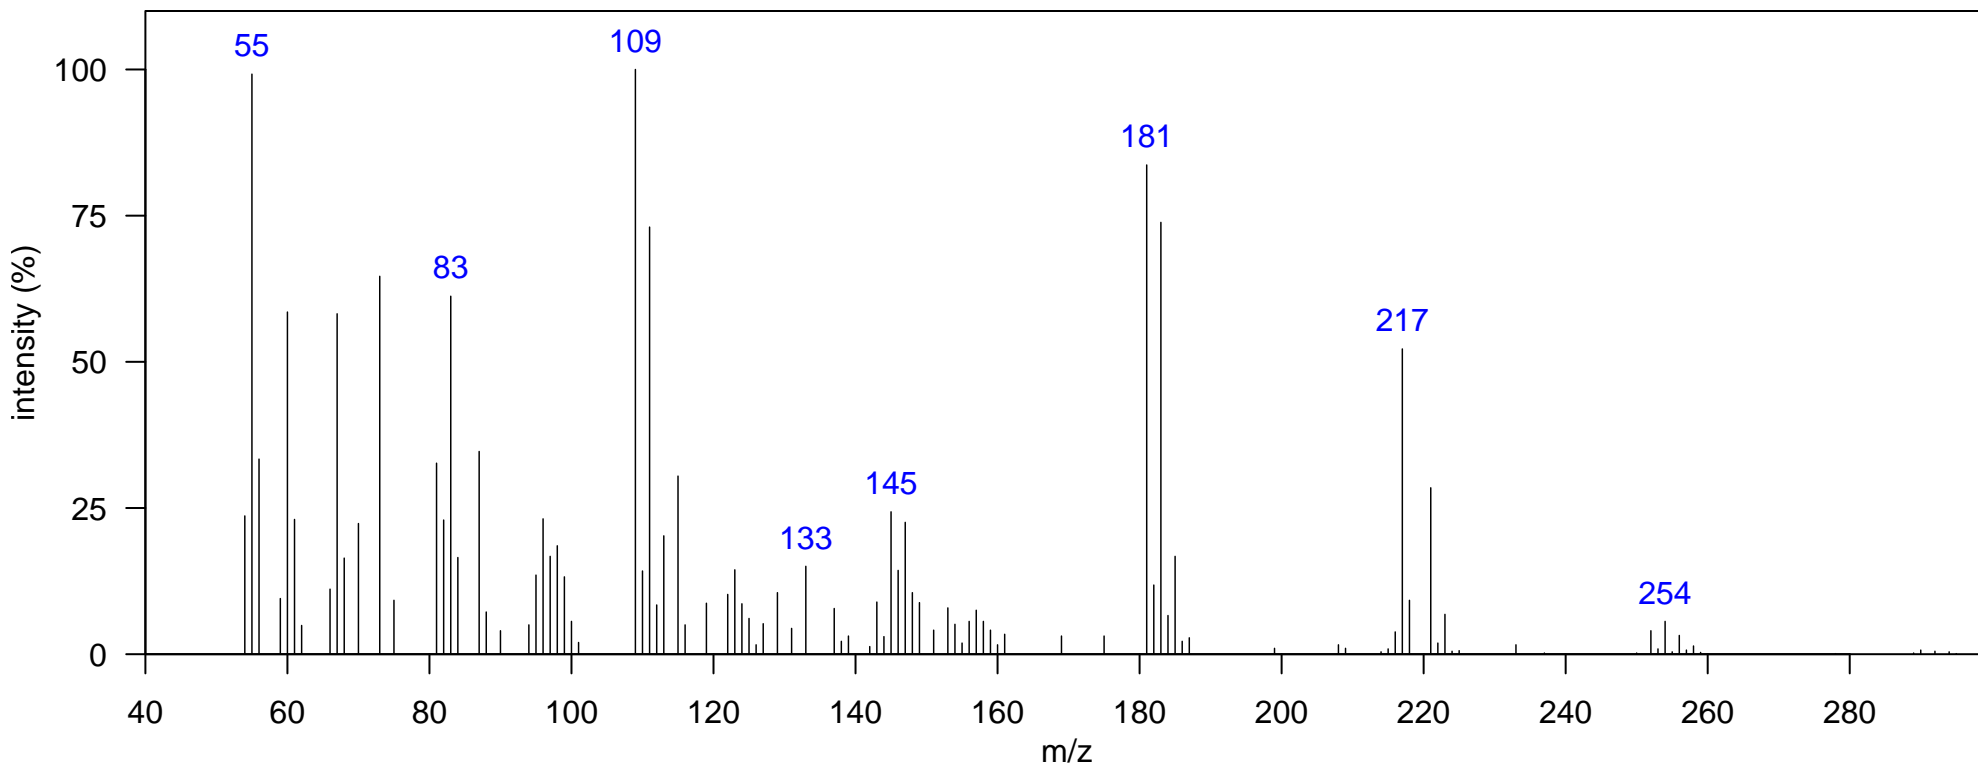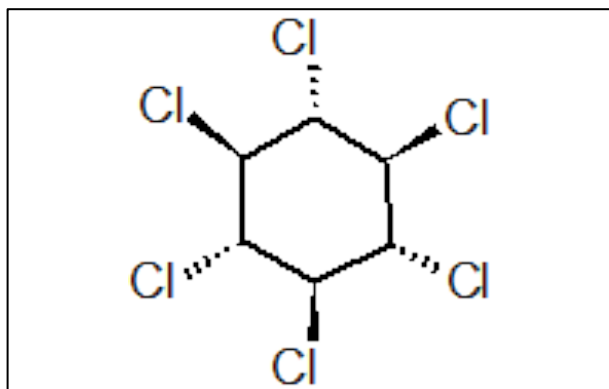

| m/z [Fragment]           |
|--------------------------|
| 252 [M-HCl] <sup>+</sup> |

Name: polychlorinated styrene 6Cl

Class: Chlorinated styrene

Matrix: South Atlantic Dolphin Blubber  
In N. Atlantic: TRUE, In N. Pacific: FALSE  
Typically Monitored: FALSE  
Comment:

Instrument: GCxGC-TOF, EI, 70 eV  
1D RT, 2D RT (s): 1068.73, 0.858  
Quantitative Ion m/z: 310

Elemental Formula: C<sub>8</sub>H<sub>2</sub>Cl<sub>6</sub>  
Source: anthropogenic  
Identification: Authentic MS

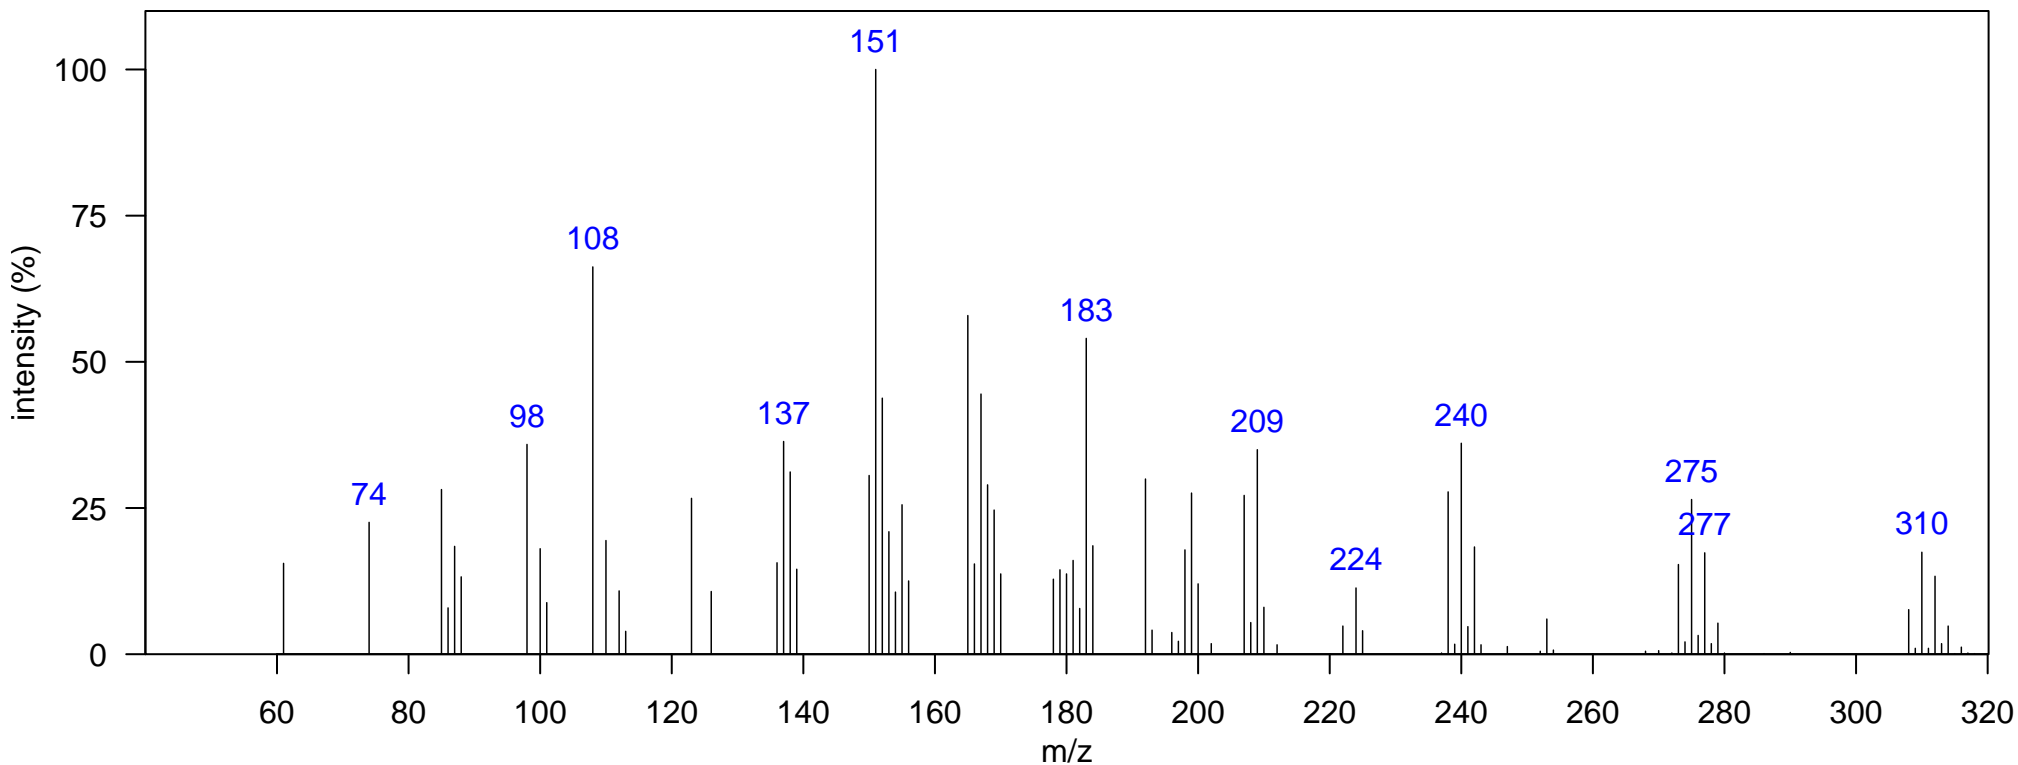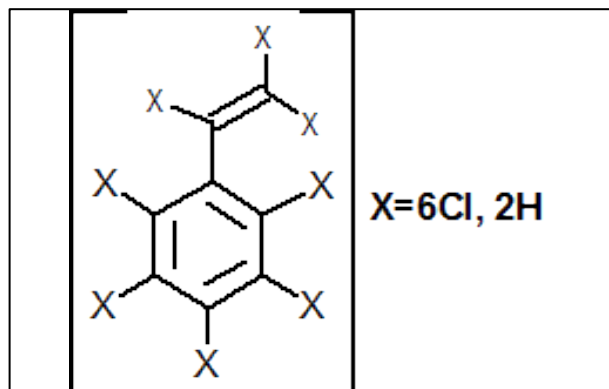

| m/z [Fragment]          |
|-------------------------|
| 273 [M-Cl] <sup>+</sup> |
| 308 M <sup>+</sup>      |

Name: polychlorinated styrene 7Cl

Class: Chlorinated styrene

Matrix: South Atlantic Dolphin Blubber  
In N. Atlantic: TRUE, In N. Pacific: TRUE  
Typically Monitored: FALSE  
Comment:

Instrument: GCxGC-TOF, EI, 70 eV  
1D RT, 2D RT (s): 1184.17, 0.891  
Quantitative Ion m/z: 344

Elemental Formula: C<sub>8</sub>HCl<sub>7</sub>  
Source: anthropogenic  
Identification: Authentic MS

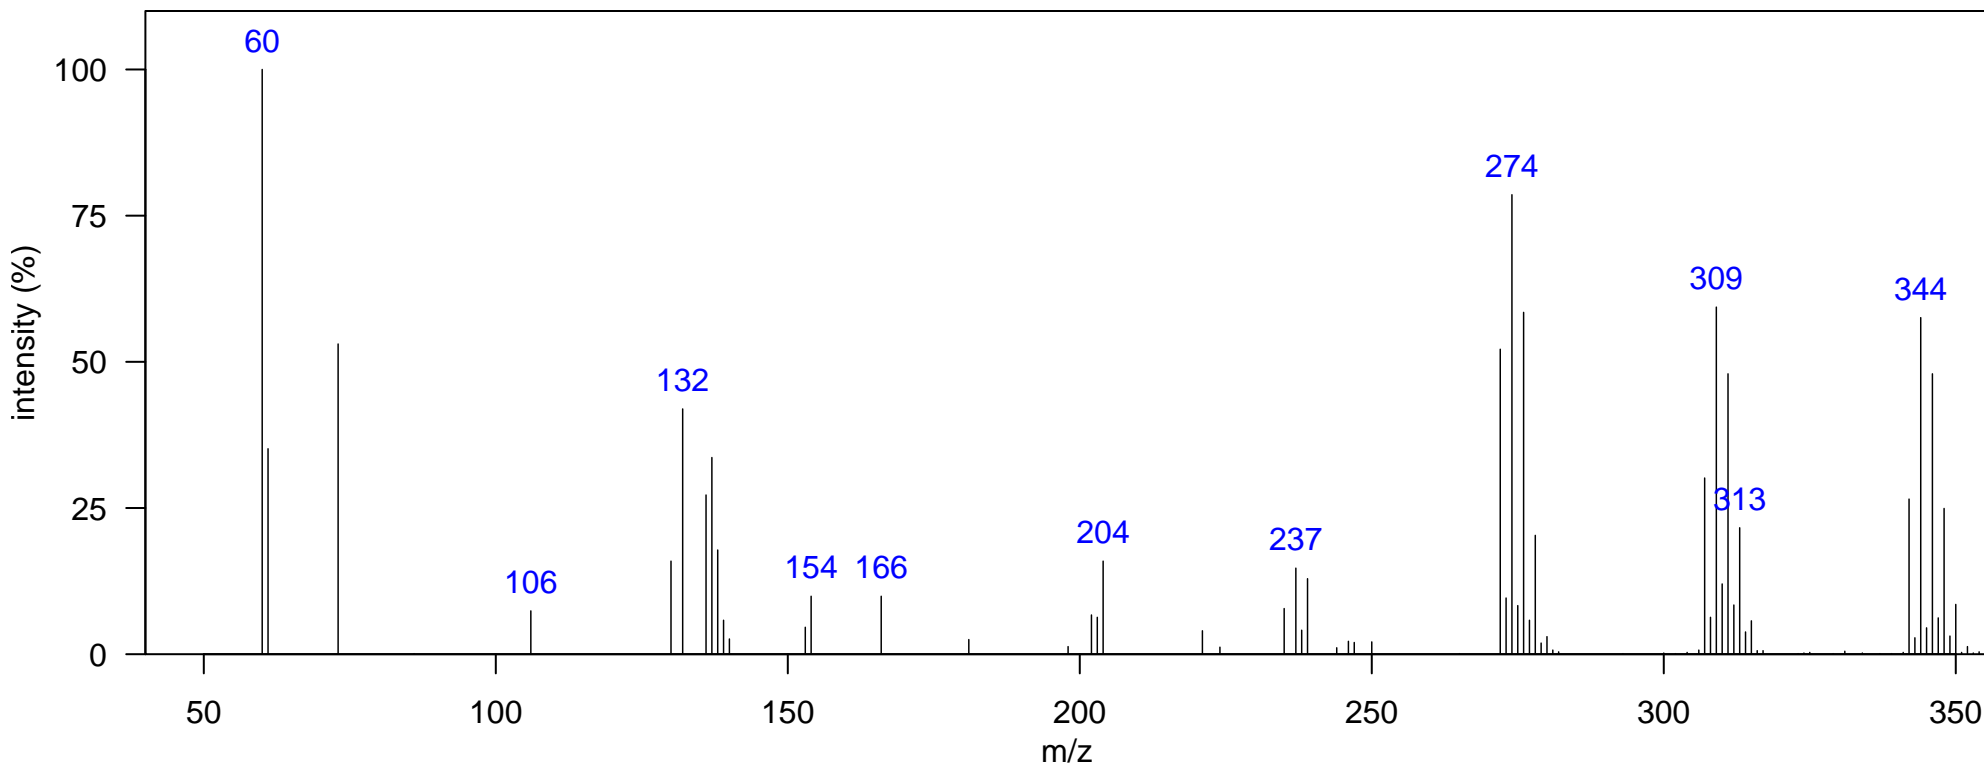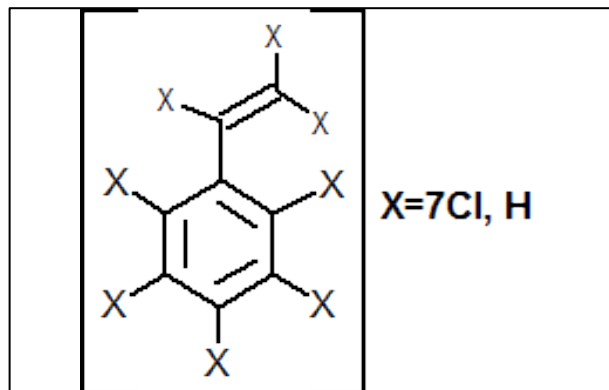

| m/z [Fragment]          |
|-------------------------|
| 307 [M-Cl] <sup>+</sup> |
| 342 M <sup>+</sup>      |

Name: di-MeOBB-Br3Cl

Class: 2MeO-Biphenyl-U

Matrix: South Atlantic Dolphin Blubber  
In N. Atlantic: FALSE, In N. Pacific: FALSE  
Typically Monitored: FALSE  
Comment:

Instrument: GCxGC-TOF, EI, 70 eV  
1D RT, 2D RT (s): 1530.47, 1.115  
Quantitative Ion m/z: 486

Elemental Formula: C<sub>14</sub>H<sub>10</sub>Br<sub>3</sub>ClO<sub>2</sub>  
Source: unknown  
Identification: NA

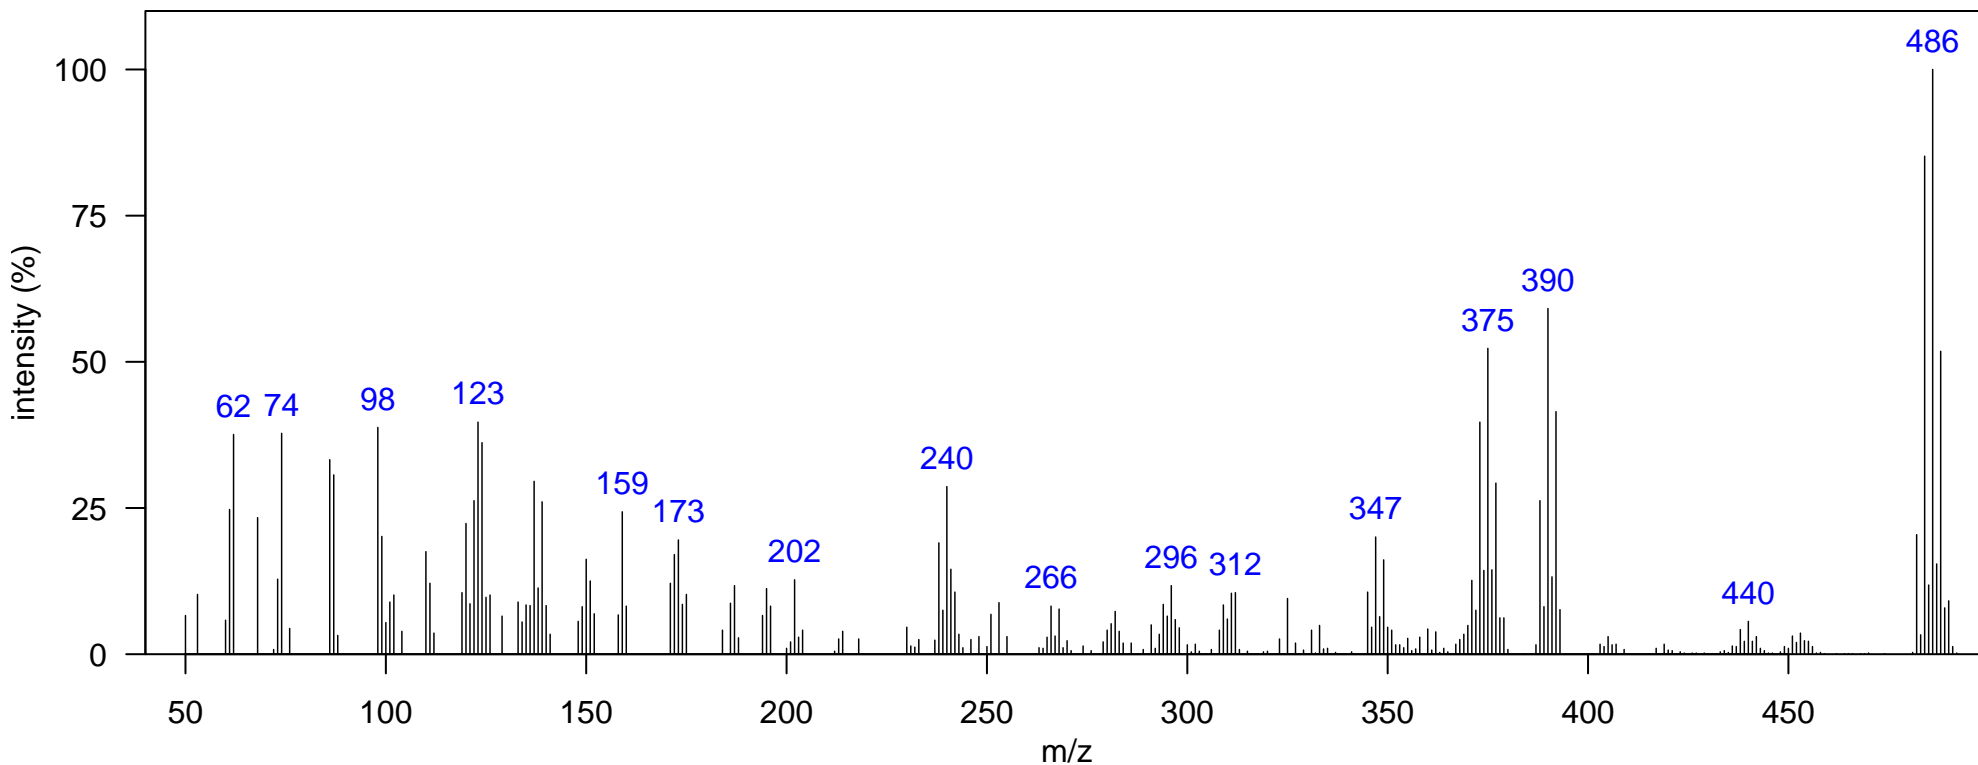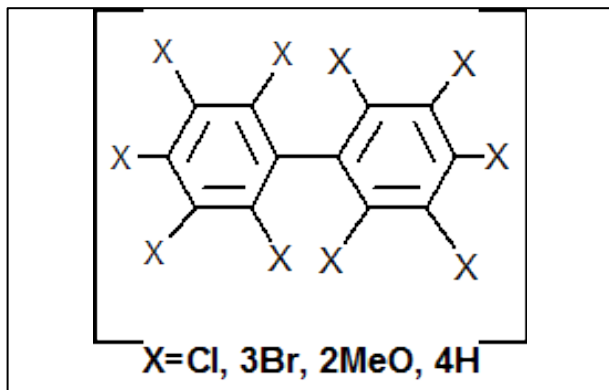

| m/z [Fragment]                                            |
|-----------------------------------------------------------|
| 373 [M-CH <sub>3</sub> -CH <sub>3</sub> -Br] <sup>+</sup> |
| 388 [M-CH <sub>3</sub> -Br] <sup>+</sup>                  |
| 482 M <sup>+</sup>                                        |

Name: di-MeOPBB-80

Class: 2MeO-Biphenyl-N

Matrix: South Atlantic Dolphin Blubber  
In N. Atlantic: TRUE, In N. Pacific: TRUE  
Typically Monitored: FALSE  
Comment:

Instrument: GCxGC-TOF, EI, 70 eV  
1D RT, 2D RT (s): 1582.94, 1.274  
Quantitative Ion m/z: 530

Elemental Formula: C<sub>14</sub>H<sub>10</sub>Br<sub>4</sub>O<sub>2</sub>  
Source: natural  
Identification: Authentic MS RT

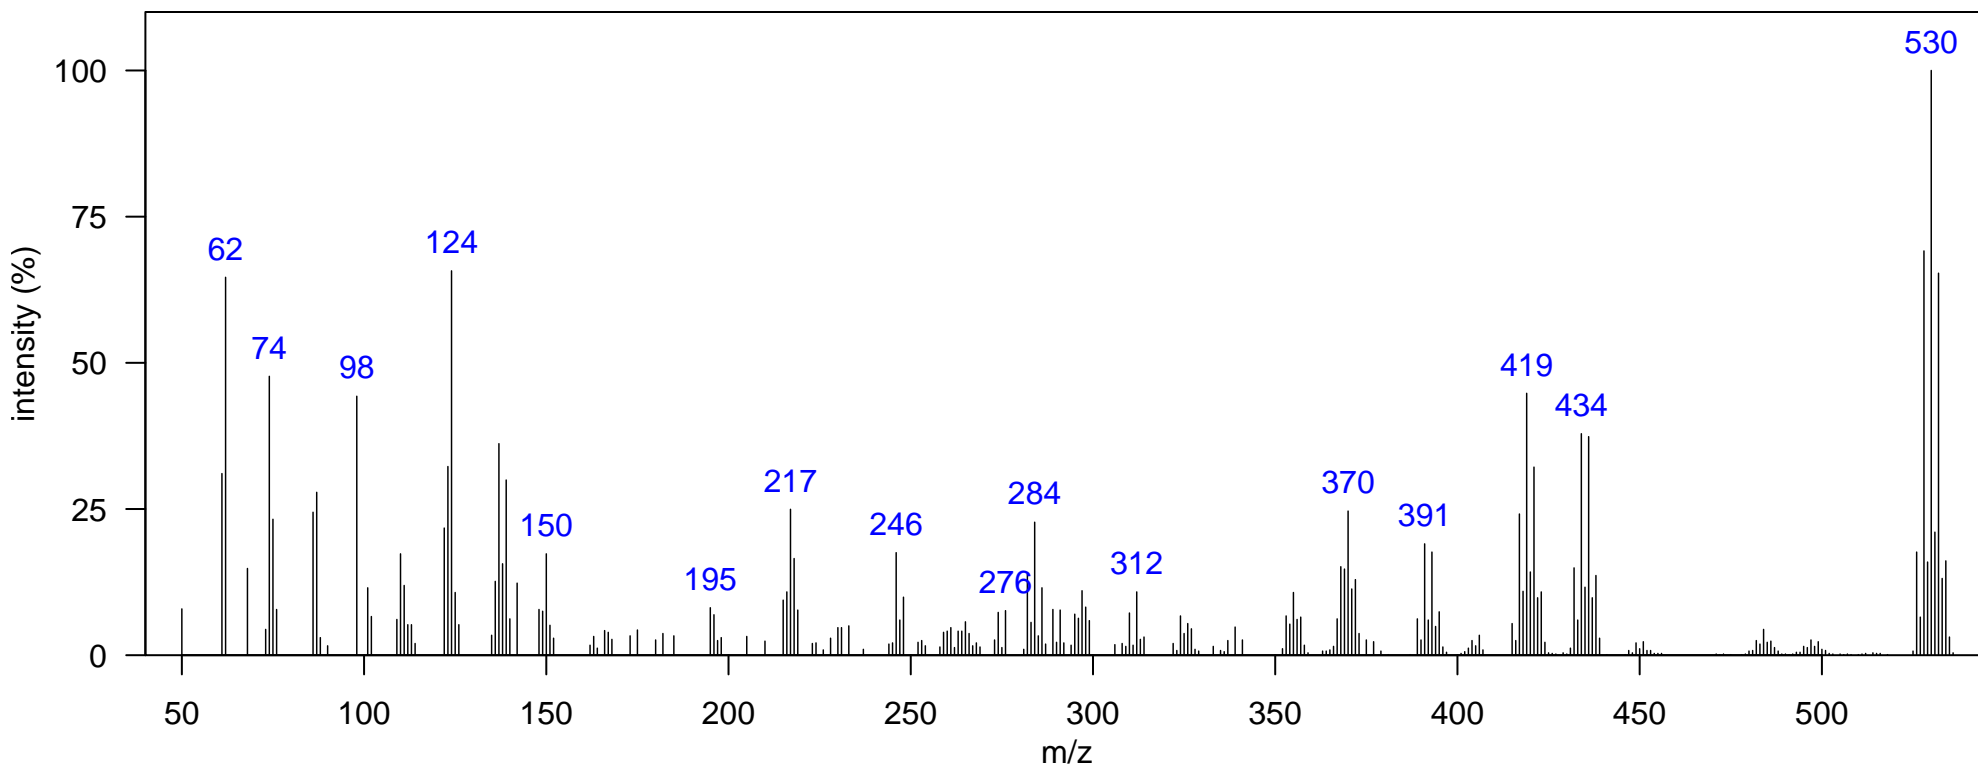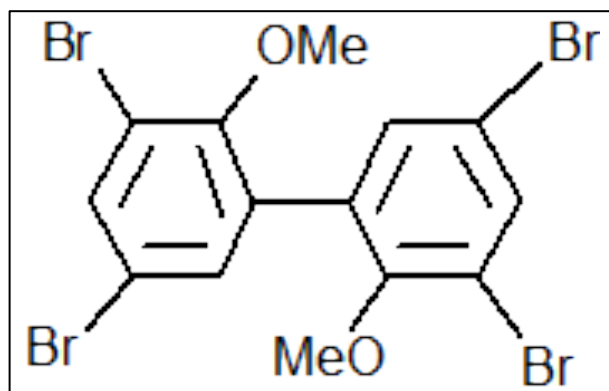

| m/z [Fragment]                                            |
|-----------------------------------------------------------|
| 417 [M-CH <sub>3</sub> -CH <sub>3</sub> -Br] <sup>+</sup> |
| 432 [M-CH <sub>3</sub> -Br] <sup>+</sup>                  |
| 526 M <sup>+</sup>                                        |

Name: MeOBCDE Br3Cl 1

Class: MeO-B/CDE

Matrix: South Atlantic Dolphin Blubber  
In N. Atlantic: FALSE, In N. Pacific: TRUE  
Typically Monitored: FALSE  
Comment: unknown-33 (Pacific Library)

Instrument: GCxGC-TOF, EI, 70 eV  
1D RT, 2D RT (s): 1544.46, 1.241  
Quantitative Ion m/z: 472

Elemental Formula: C<sub>13</sub>H<sub>8</sub>Br<sub>3</sub>ClO<sub>2</sub>  
Source: natural  
Identification: Manual-Congener Group

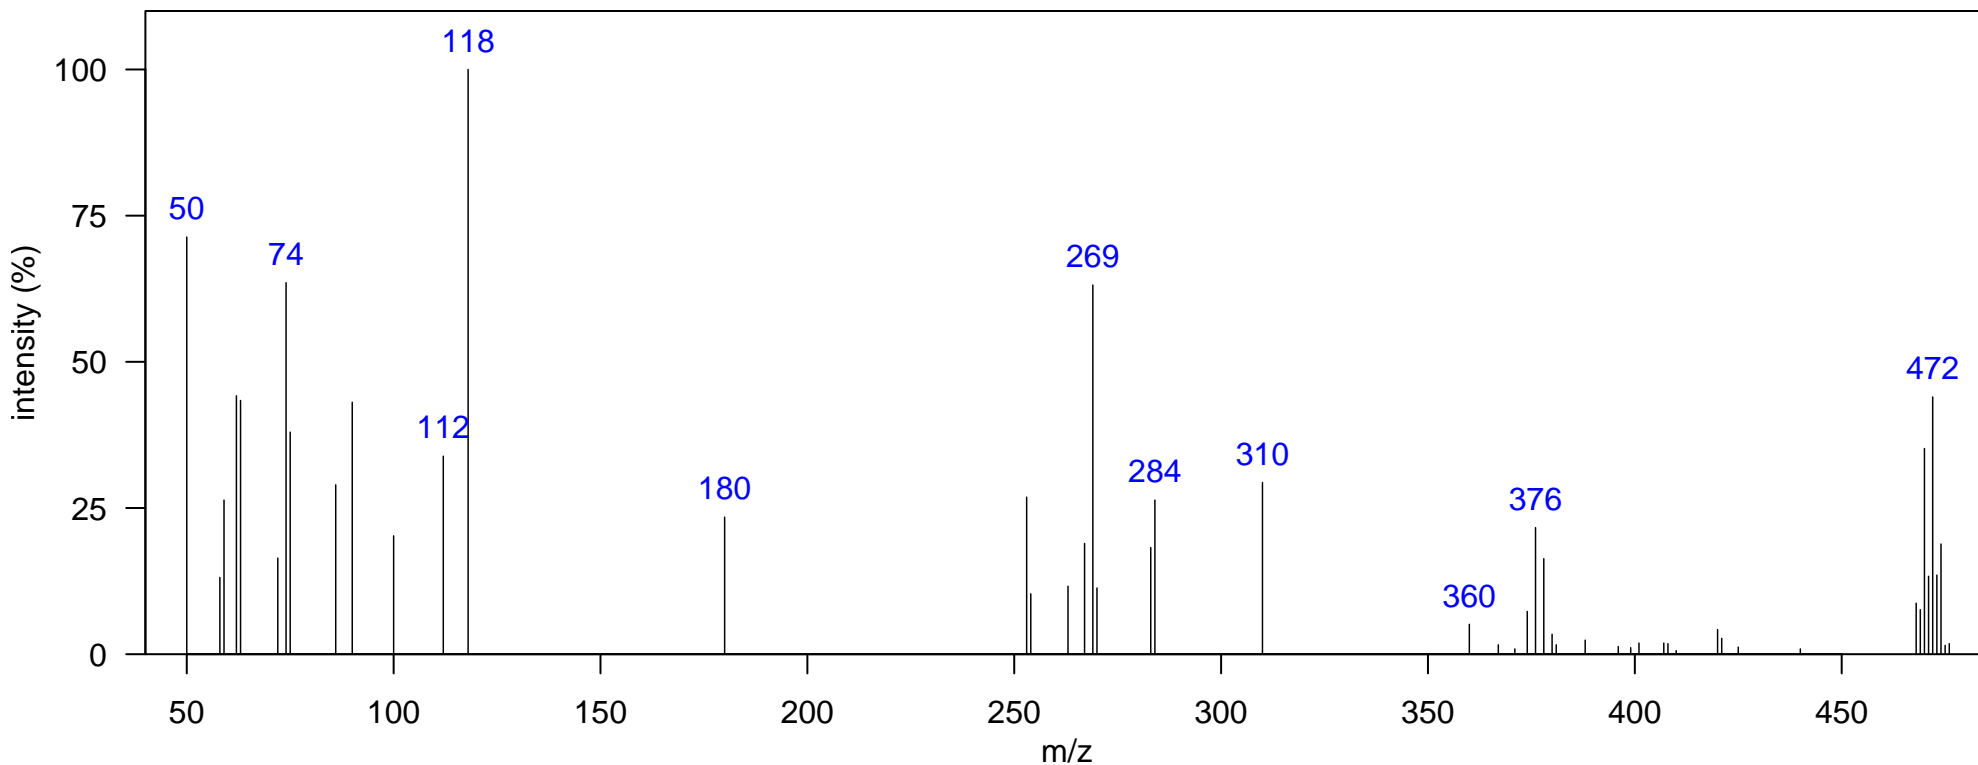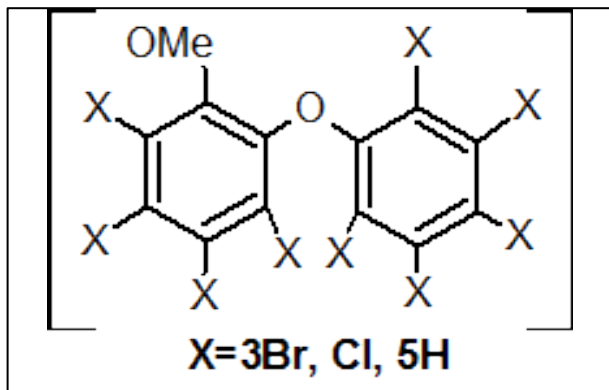

| m/z [Fragment]                           |
|------------------------------------------|
| 374 [M-Br-CH <sub>3</sub> ] <sup>+</sup> |
| 468 M <sup>+</sup>                       |

Name: MeOBCDE Br3Cl 2

Class: MeO-B/CDE

Matrix: South Atlantic Dolphin Blubber  
In N. Atlantic: TRUE, In N. Pacific: TRUE  
Typically Monitored: FALSE  
Comment: MeOBCDE Br3Cl (Pacific Library)

Instrument: GCxGC-TOF, EI, 70 eV  
1D RT, 2D RT (s): 1547.96, 1.221  
Quantitative Ion m/z: 472

Elemental Formula: C<sub>13</sub>H<sub>8</sub>Br<sub>3</sub>ClO<sub>2</sub>  
Source: natural  
Identification: Manual-Congener Group

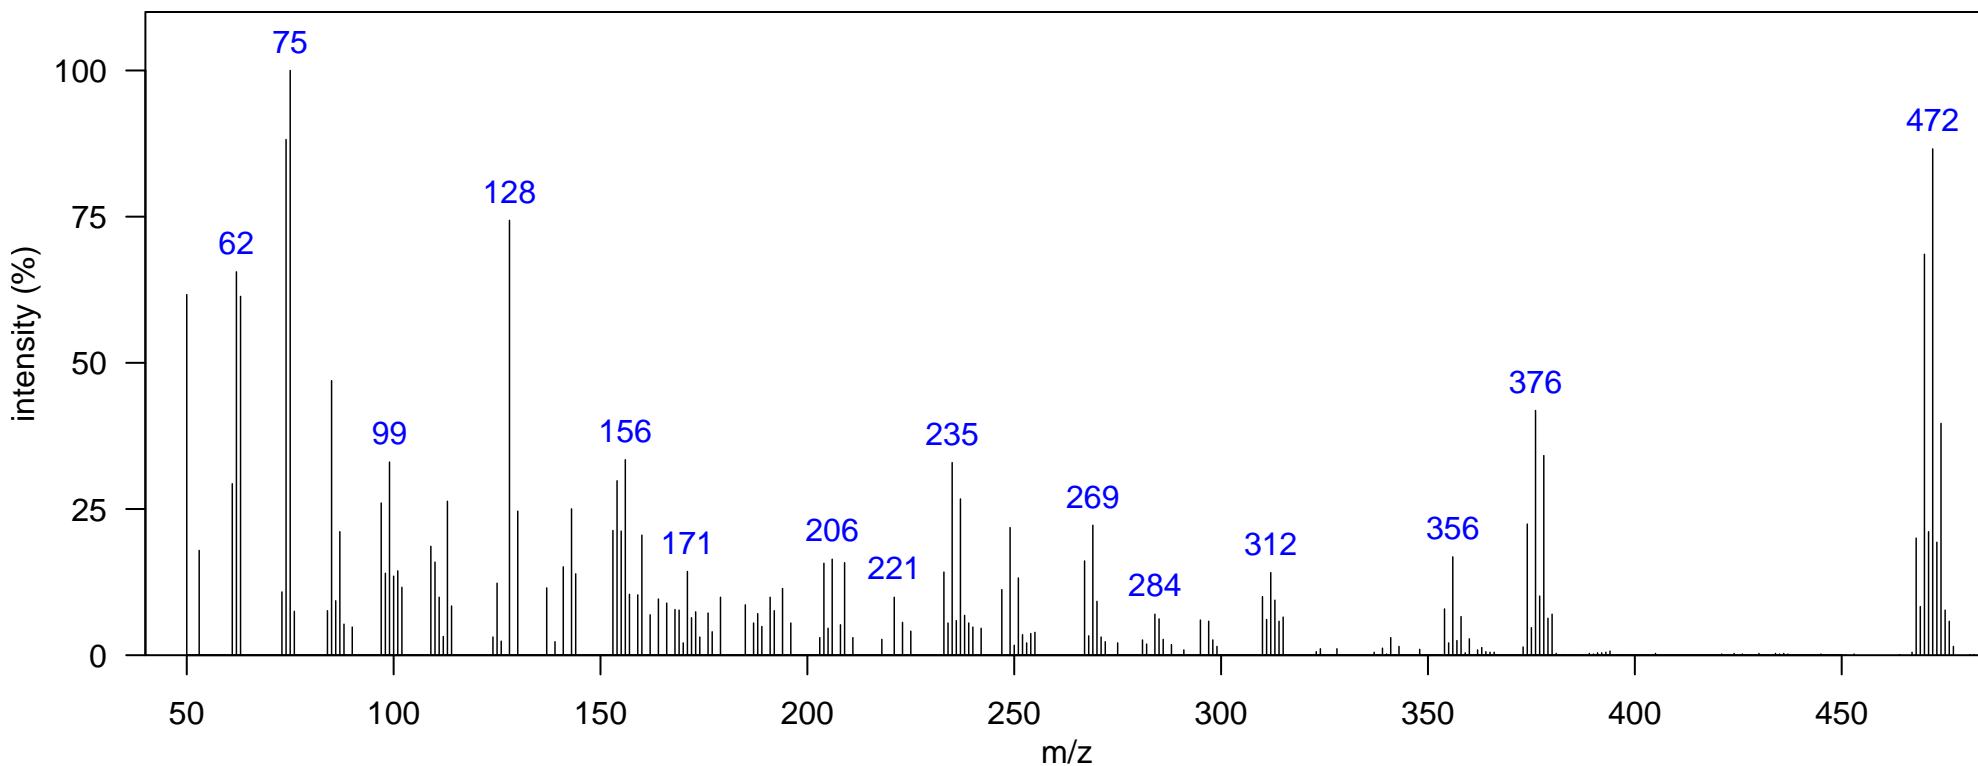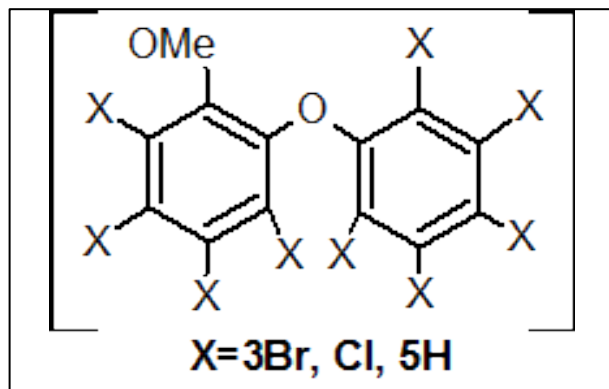

| m/z [Fragment]                           |
|------------------------------------------|
| 354 [M-BrCl] <sup>+</sup>                |
| 374 [M-Br-CH <sub>3</sub> ] <sup>+</sup> |
| 468 M <sup>+</sup>                       |



Name: MeOBDE 3Br

Class: MeO-BDE

Matrix: South Atlantic Dolphin Blubber  
In N. Atlantic: TRUE, In N. Pacific: TRUE  
Typically Monitored: FALSE  
Comment:

Instrument: GCxGC-TOF, EI, 70 eV  
1D RT, 2D RT (s): 1457.01, 1.129  
Quantitative Ion m/z: 438

Elemental Formula: C<sub>13</sub>H<sub>9</sub>Br<sub>3</sub>O<sub>2</sub>  
Source: natural  
Identification: Authentic MS

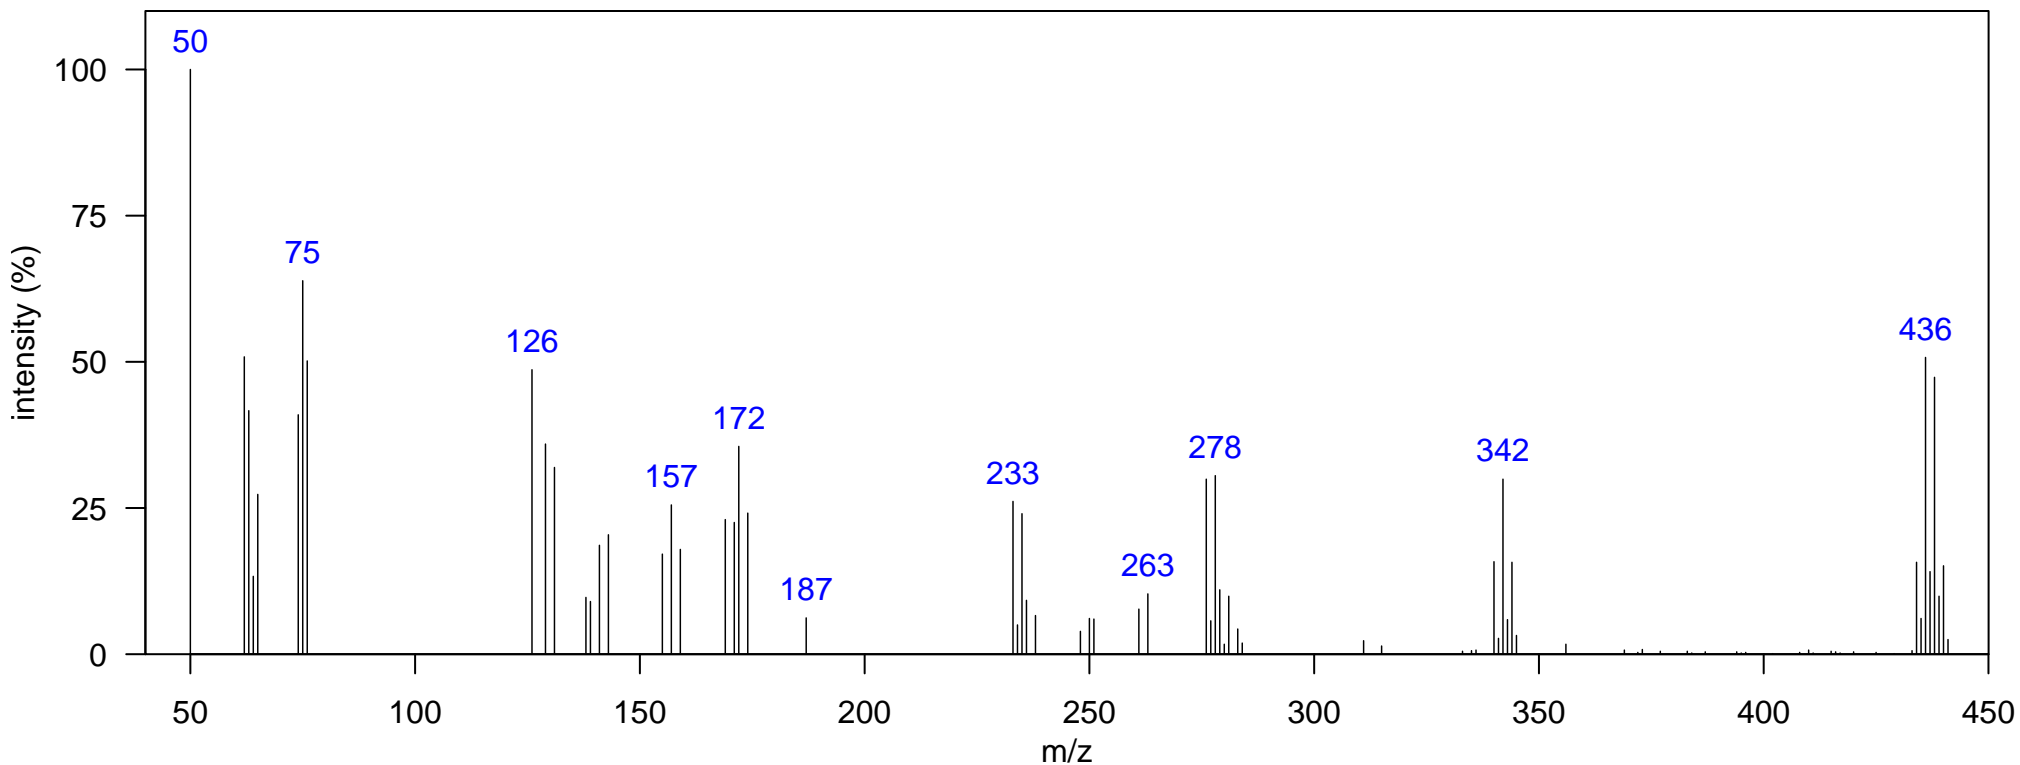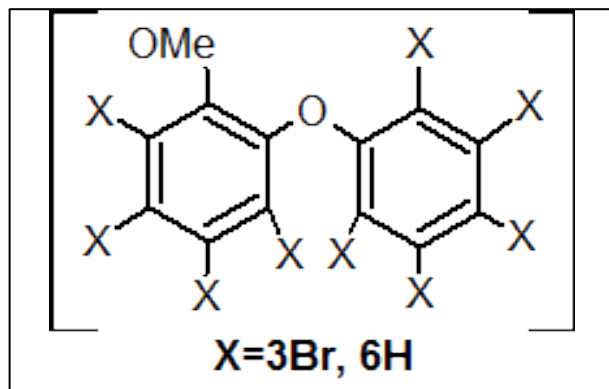

| m/z [Fragment]                           |
|------------------------------------------|
| 276 [M-Br <sub>2</sub> ] <sup>+</sup>    |
| 340 [M-Br-CH <sub>3</sub> ] <sup>+</sup> |
| 434 M <sup>+</sup>                       |

Name: MeOBDE 4Br

Class: MeO-BDE

Matrix: South Atlantic Dolphin Blubber  
In N. Atlantic: TRUE, In N. Pacific: TRUE  
Typically Monitored: FALSE  
Comment:

Instrument: GCxGC-TOF, EI, 70 eV  
1D RT, 2D RT (s): 1561.95, 1.294  
Quantitative Ion m/z: 516

Elemental Formula: C<sub>13</sub>H<sub>8</sub>Br<sub>4</sub>O<sub>2</sub>  
Source: natural  
Identification: Authentic MS

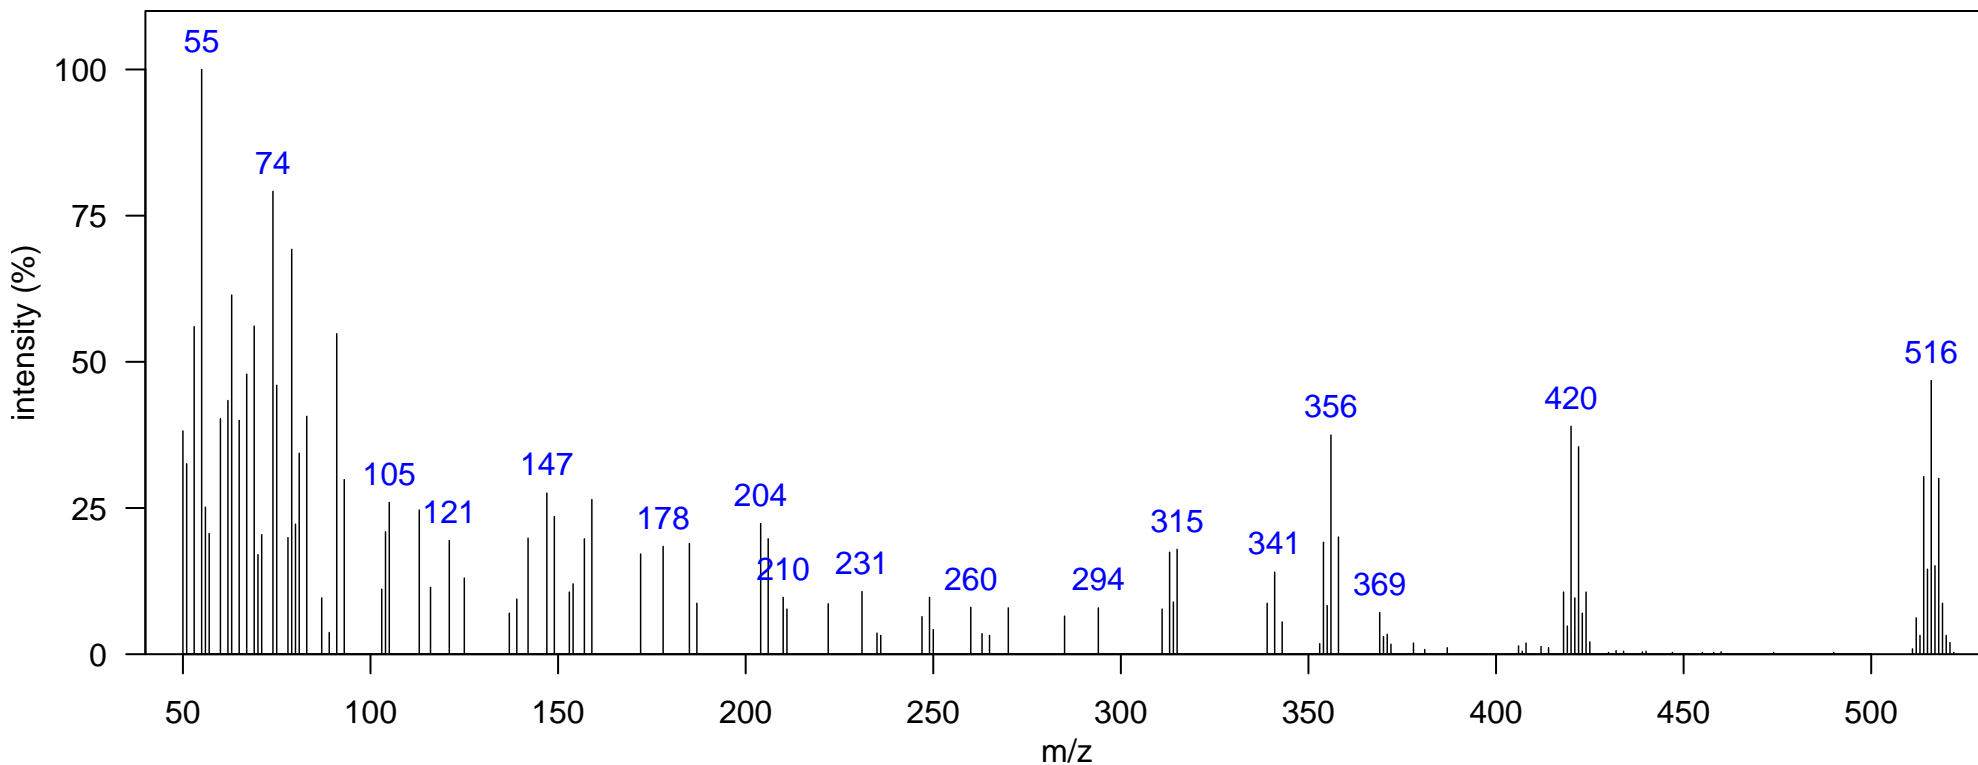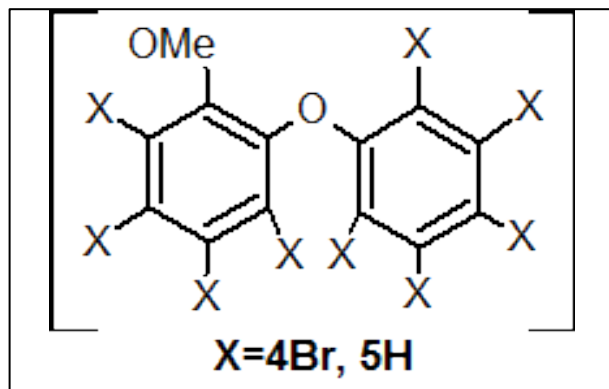

| m/z [Fragment]                           |
|------------------------------------------|
| 418 [M-Br-CH <sub>3</sub> ] <sup>+</sup> |
| 512 M <sup>+</sup>                       |

Name: 2'-MeOBDE-68

Class: MeO-BDE

Matrix: South Atlantic Dolphin Blubber  
In N. Atlantic: TRUE, In N. Pacific: TRUE  
Typically Monitored: FALSE  
Comment:

Instrument: GCxGC-TOF, EI, 70 eV  
1D RT, 2D RT (s): 1579.44, 1.28  
Quantitative Ion m/z: 516

Elemental Formula: C<sub>13</sub>H<sub>8</sub>Br<sub>4</sub>O<sub>2</sub>  
Source: natural  
Identification: Authentic MS RT

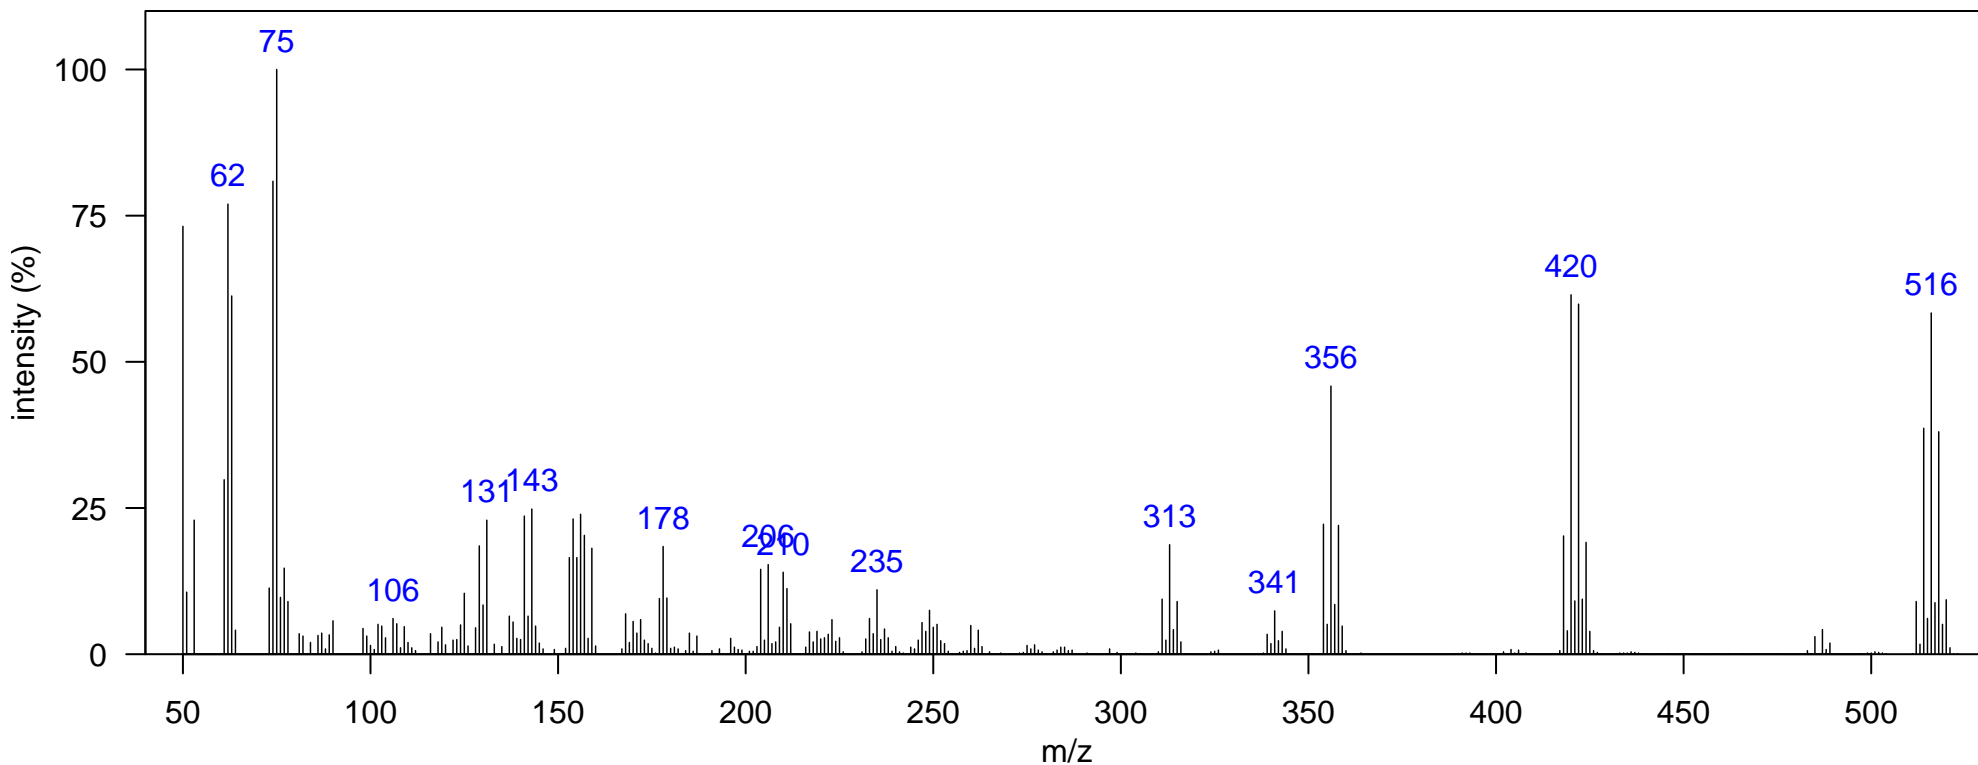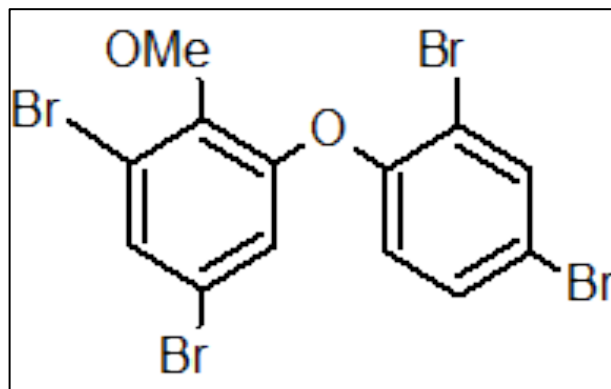

| m/z [Fragment]                           |
|------------------------------------------|
| 354 [M-Br <sub>2</sub> ]                 |
| 418 [M-Br-CH <sub>3</sub> ] <sup>+</sup> |
| 512 M <sup>+</sup>                       |

Name: 6-MeOBDE-47

Class: MeO-BDE

Matrix: South Atlantic Dolphin Blubber  
In N. Atlantic: TRUE, In N. Pacific: TRUE  
Typically Monitored: FALSE  
Comment:

Instrument: GCxGC-TOF, EI, 70 eV  
1D RT, 2D RT (s): 1600.43, 1.399  
Quantitative Ion m/z: 516

Elemental Formula: C<sub>13</sub>H<sub>8</sub>Br<sub>4</sub>O<sub>2</sub>  
Source: natural  
Identification: Authentic MS RT

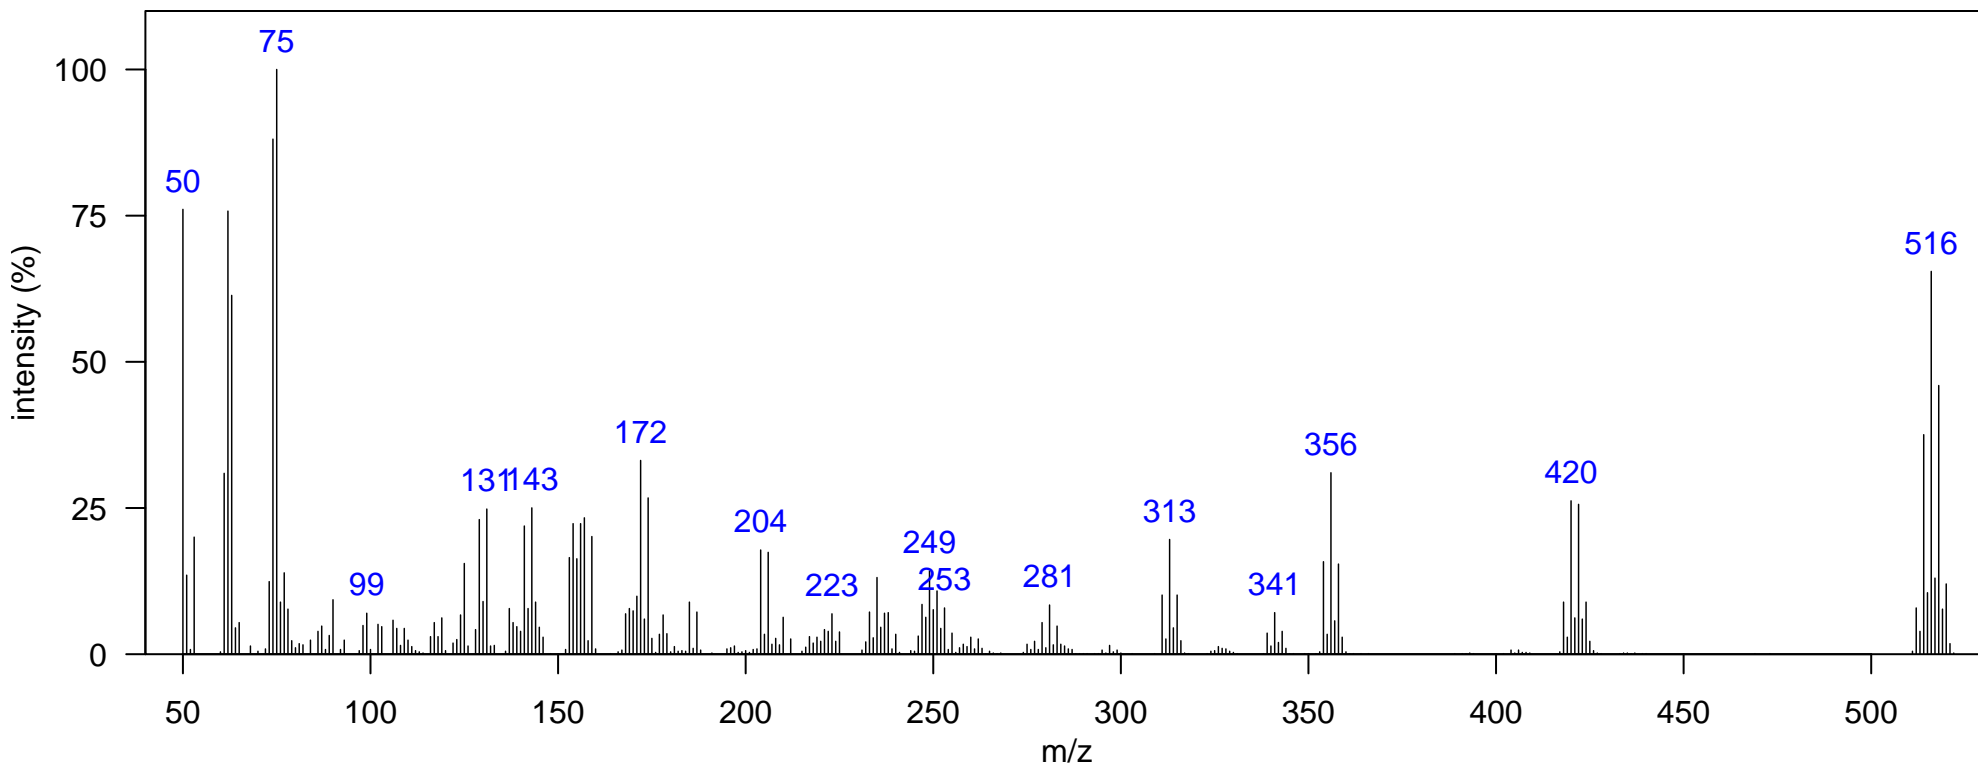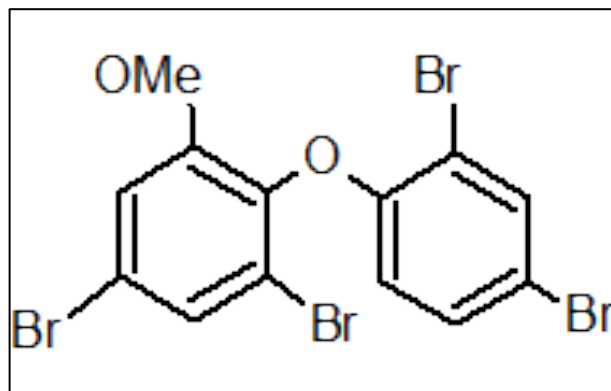

| m/z [Fragment]                           |
|------------------------------------------|
| 354 [M-Br <sub>2</sub> ]                 |
| 418 [M-Br-CH <sub>3</sub> ] <sup>+</sup> |
| 512 M <sup>+</sup>                       |

Name: MeOBDE 5Br

Class: MeO-BDE

Matrix: South Atlantic Dolphin Blubber  
In N. Atlantic: TRUE, In N. Pacific: FALSE  
Typically Monitored: FALSE  
Comment:

Instrument: GCxGC-TOF, EI, 70 eV  
1D RT, 2D RT (s): 1684.38, 1.637  
Quantitative Ion m/z: 596

Elemental Formula: C<sub>13</sub>H<sub>7</sub>Br<sub>5</sub>O<sub>2</sub>  
Source: natural  
Identification: Manual-Congener Group

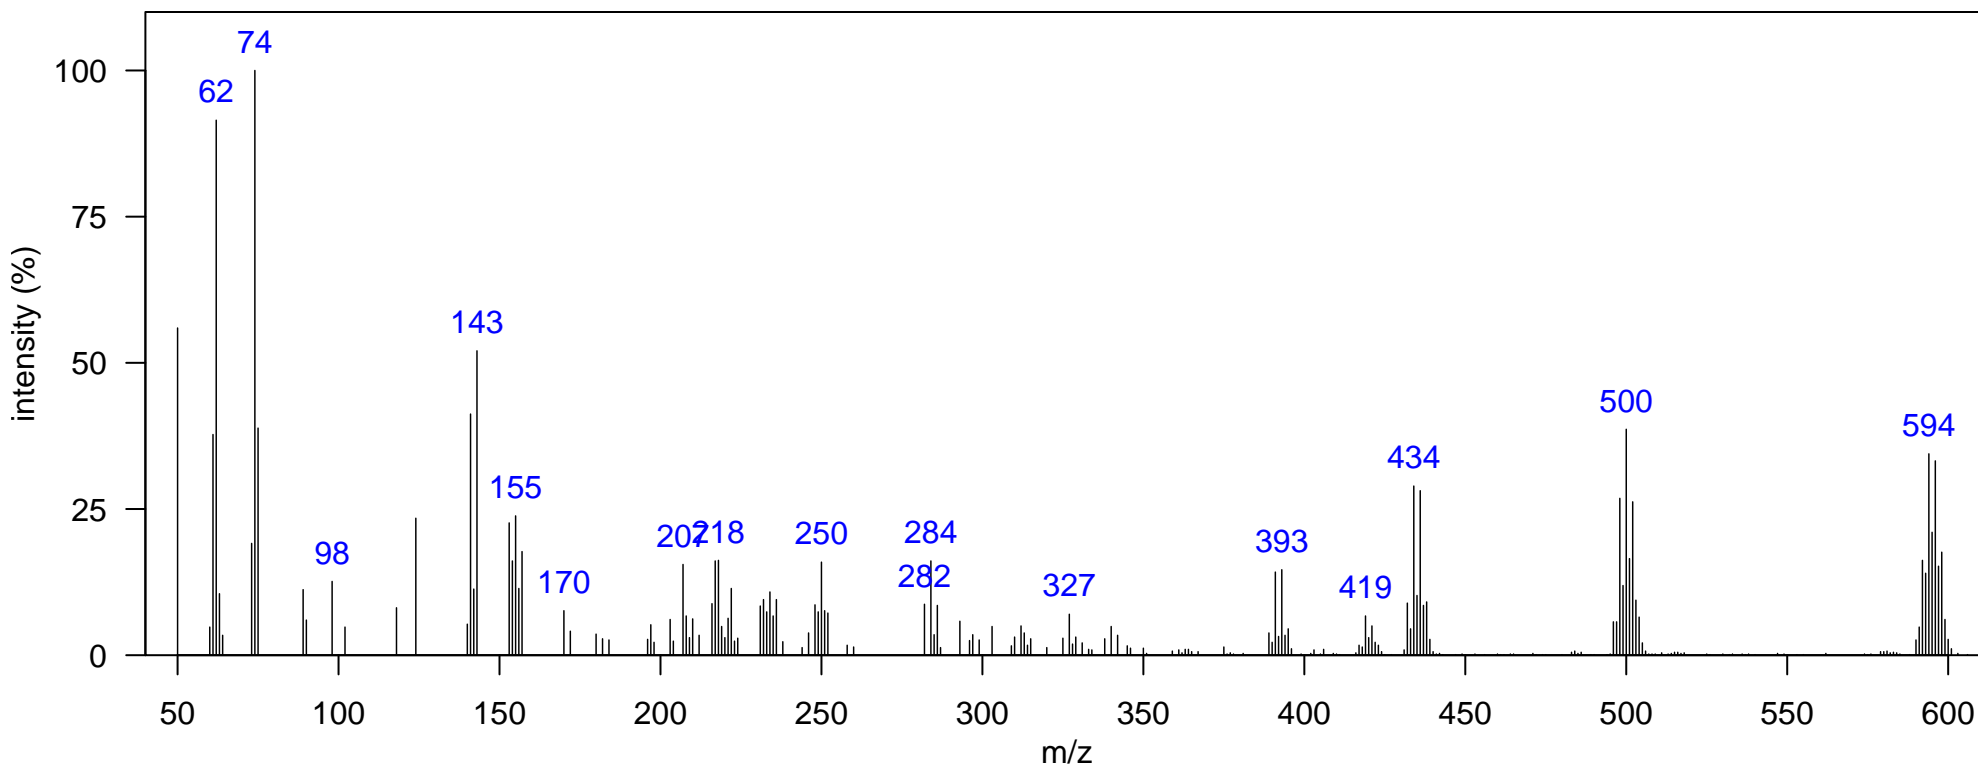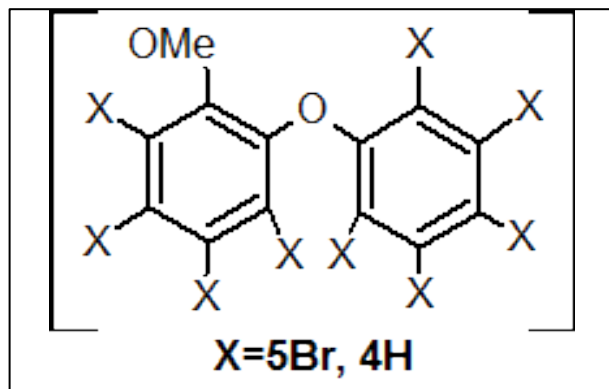

| m/z [Fragment]                           |
|------------------------------------------|
| 432 [M-Br <sub>2</sub> ] <sup>+</sup>    |
| 496 [M-Br-CH <sub>3</sub> ] <sup>+</sup> |
| 590 M <sup>+</sup>                       |

Name: 6'-MeOBDE-99

Class: MeO-BDE

Matrix: South Atlantic Dolphin Blubber  
In N. Atlantic: TRUE, In N. Pacific: TRUE  
Typically Monitored: FALSE  
Comment:

Instrument: GCxGC-TOF, EI, 70 eV  
1D RT, 2D RT (s): 1733.35, 1.564  
Quantitative Ion m/z: 596

Elemental Formula: C<sub>13</sub>H<sub>7</sub>Br<sub>5</sub>O<sub>2</sub>  
Source: natural  
Identification: Authentic MS RT

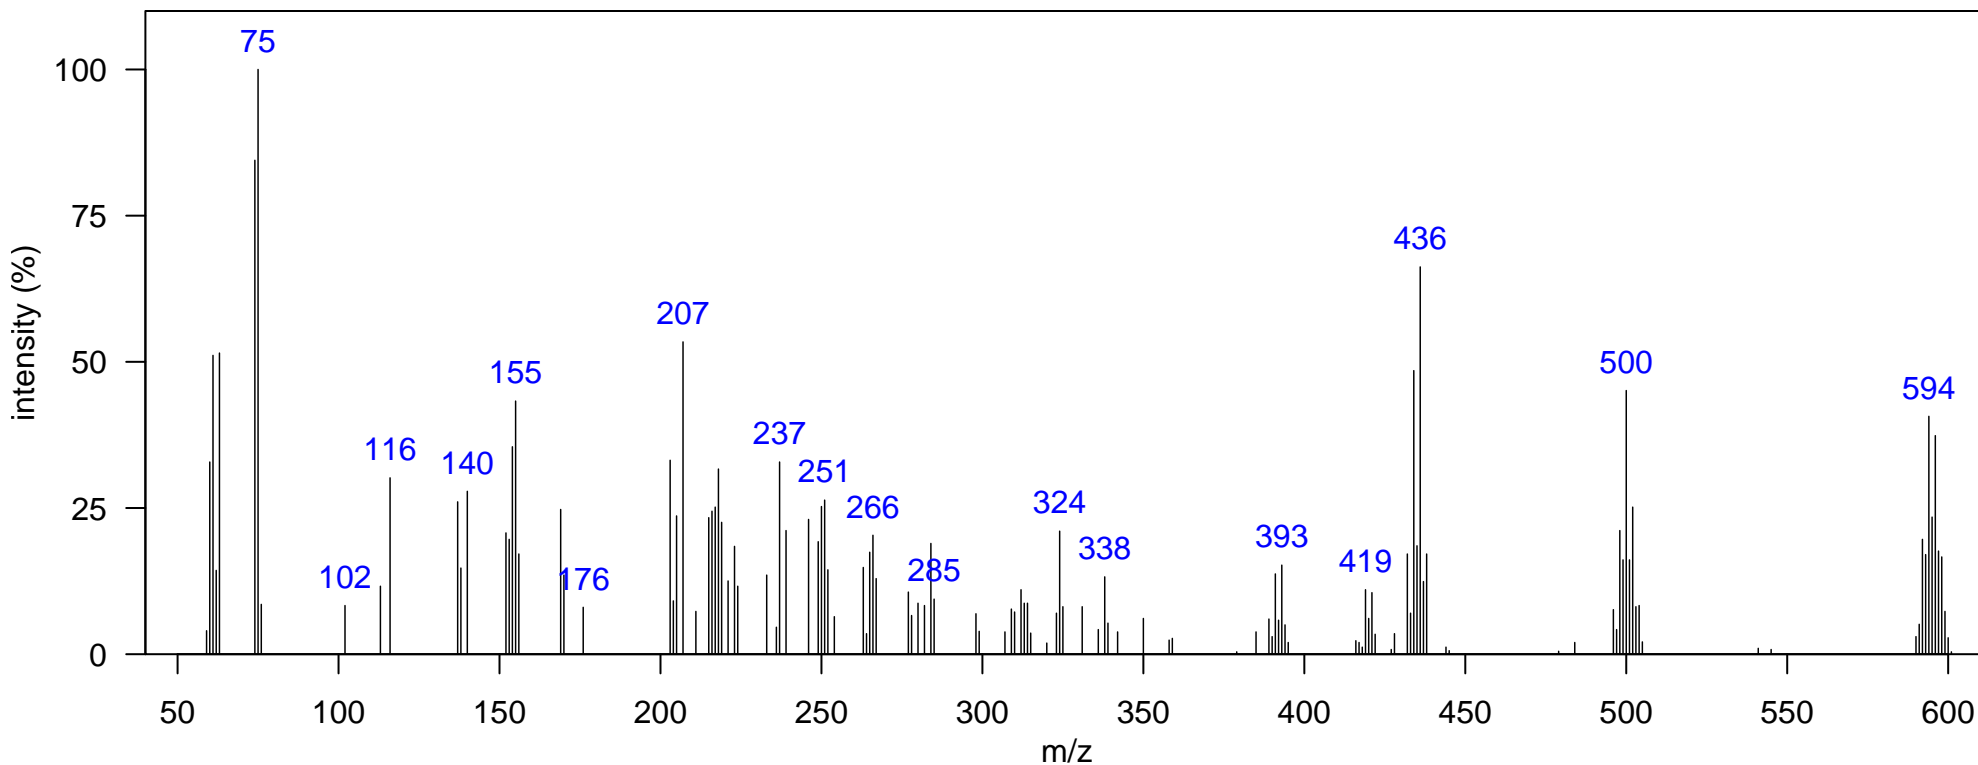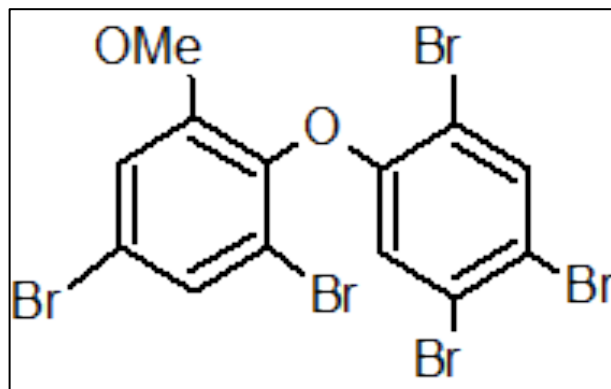

| m/z [Fragment]                           |
|------------------------------------------|
| 432 [M-Br <sub>2</sub> ] <sup>+</sup>    |
| 496 [M-Br-CH <sub>3</sub> ] <sup>+</sup> |
| 590 M <sup>+</sup>                       |

Name: DMBP 6Cl

Class: DMBP

Matrix: South Atlantic Dolphin Blubber  
In N. Atlantic: FALSE, In N. Pacific: TRUE  
Typically Monitored: FALSE  
Comment:

Instrument: GCxGC-TOF, EI, 70 eV  
1D RT, 2D RT (s): 1411.54, 1.043  
Quantitative Ion m/z: 366

Elemental Formula: C<sub>10</sub>H<sub>6</sub>Cl<sub>6</sub>N<sub>2</sub>  
Source: natural  
Identification: Authentic MS RT

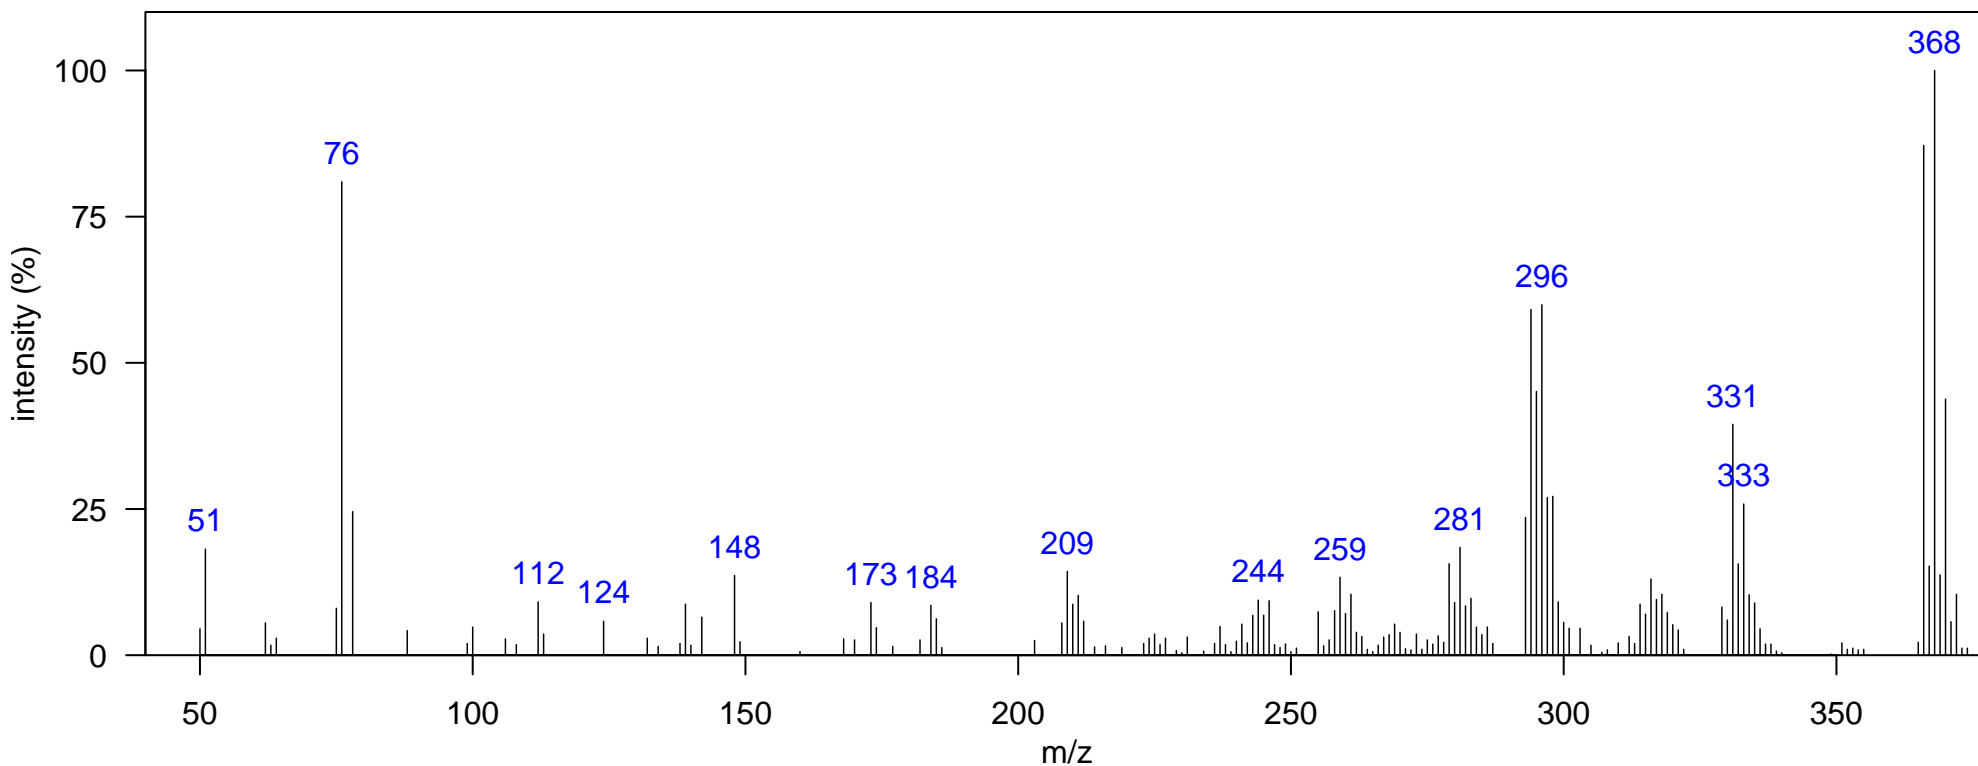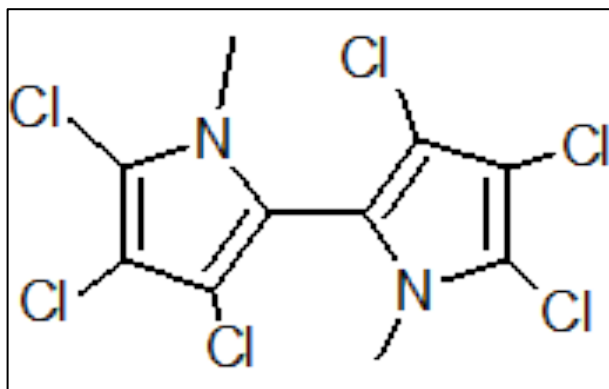

| m/z [Fragment]                        |
|---------------------------------------|
| 294 [M-Cl <sub>2</sub> ] <sup>+</sup> |
| 329 [M-Cl] <sup>+</sup>               |
| 364 M <sup>+</sup>                    |

Name: DMBP Br3Cl2

Class: DMBP

Matrix: South Atlantic Dolphin Blubber  
In N. Atlantic: TRUE, In N. Pacific: TRUE  
Typically Monitored: FALSE  
Comment: DMBP Br3Cl2 1 (Pacific Library)

Instrument: GCxGC-TOF, EI, 70 eV  
1D RT, 2D RT (s): 1432.52, 1.056  
Quantitative Ion m/z: 466

Elemental Formula: C<sub>10</sub>H<sub>7</sub>Br<sub>3</sub>Cl<sub>2</sub>N<sub>2</sub>  
Source: natural  
Identification: Authentic MS RT

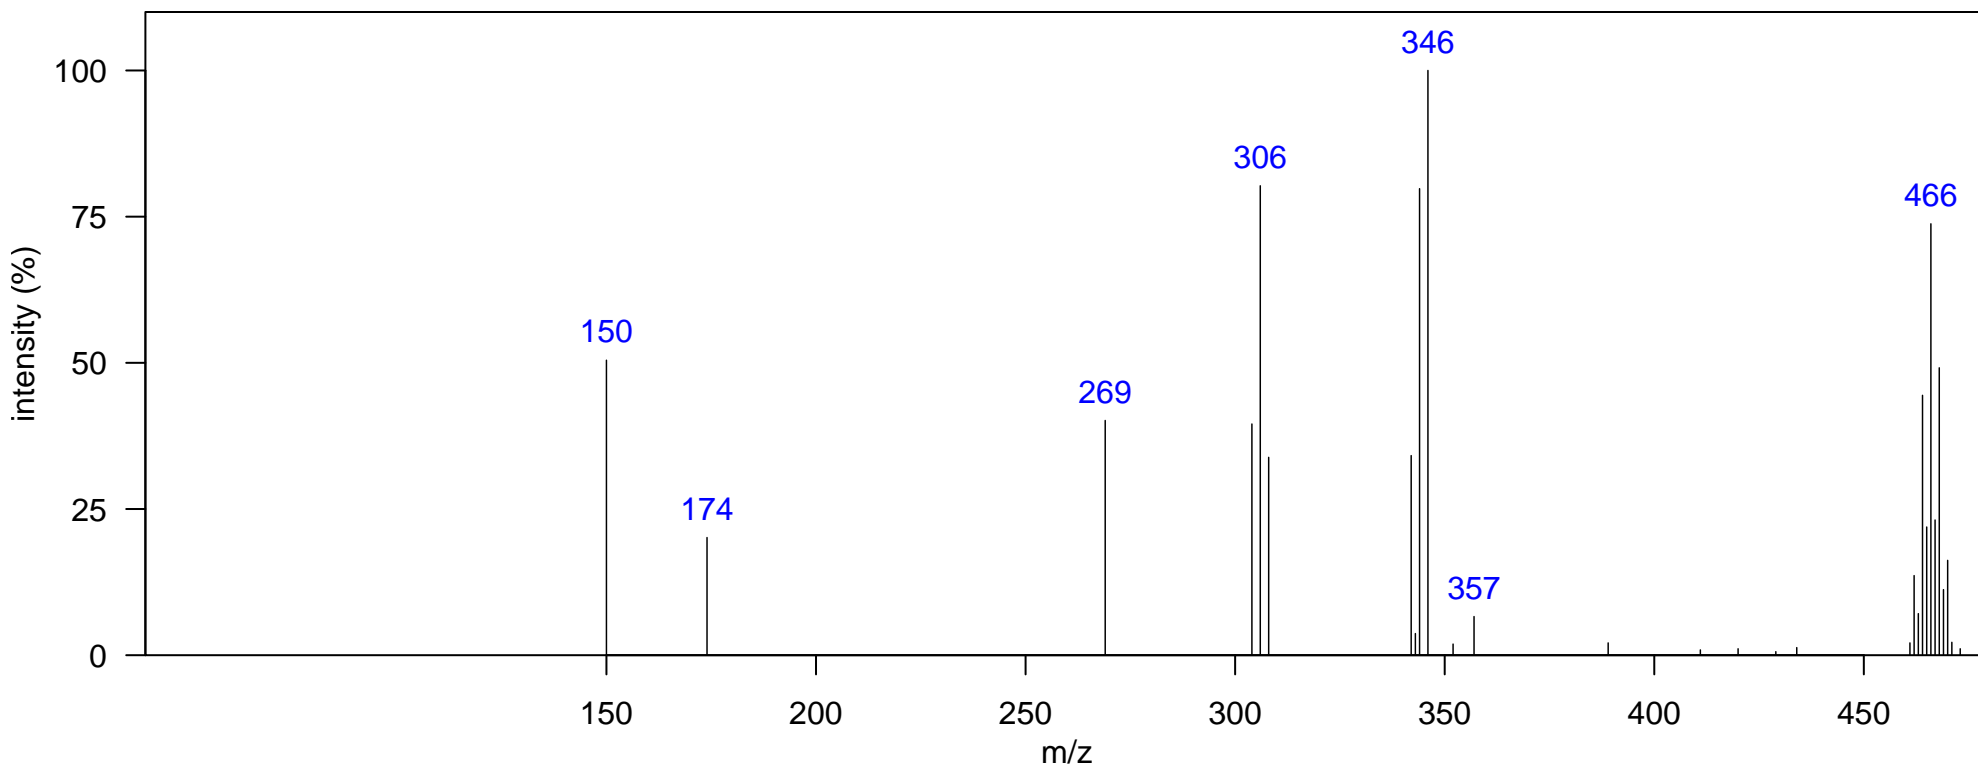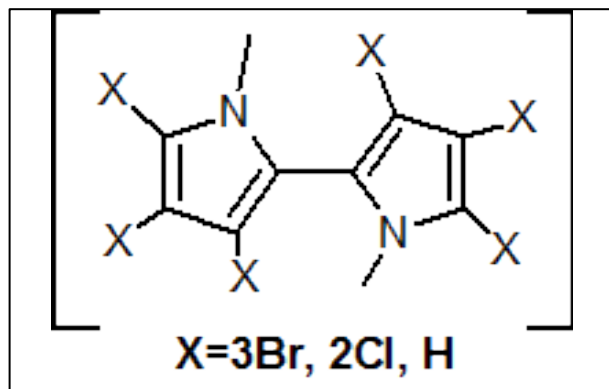

| m/z [Fragment]                            |
|-------------------------------------------|
| 304 [M-Br <sub>2</sub> ] <sup>+</sup>     |
| 342 [M-BrCNCH <sub>3</sub> ] <sup>+</sup> |
| 462 M <sup>+</sup>                        |



Name: DMBP BrCl5

Class: DMBP

Matrix: South Atlantic Dolphin Blubber  
In N. Atlantic: TRUE, In N. Pacific: TRUE  
Typically Monitored: FALSE  
Comment: unknown-4-8 (Pacific Library)

Instrument: GCxGC-TOF, EI, 70 eV  
1D RT, 2D RT (s): 1453.51, 1.076  
Quantitative Ion m/z: 410

Elemental Formula: C<sub>10</sub>H<sub>6</sub>Cl<sub>5</sub>BrN<sub>2</sub>  
Source: natural  
Identification: Manual-Congener Group

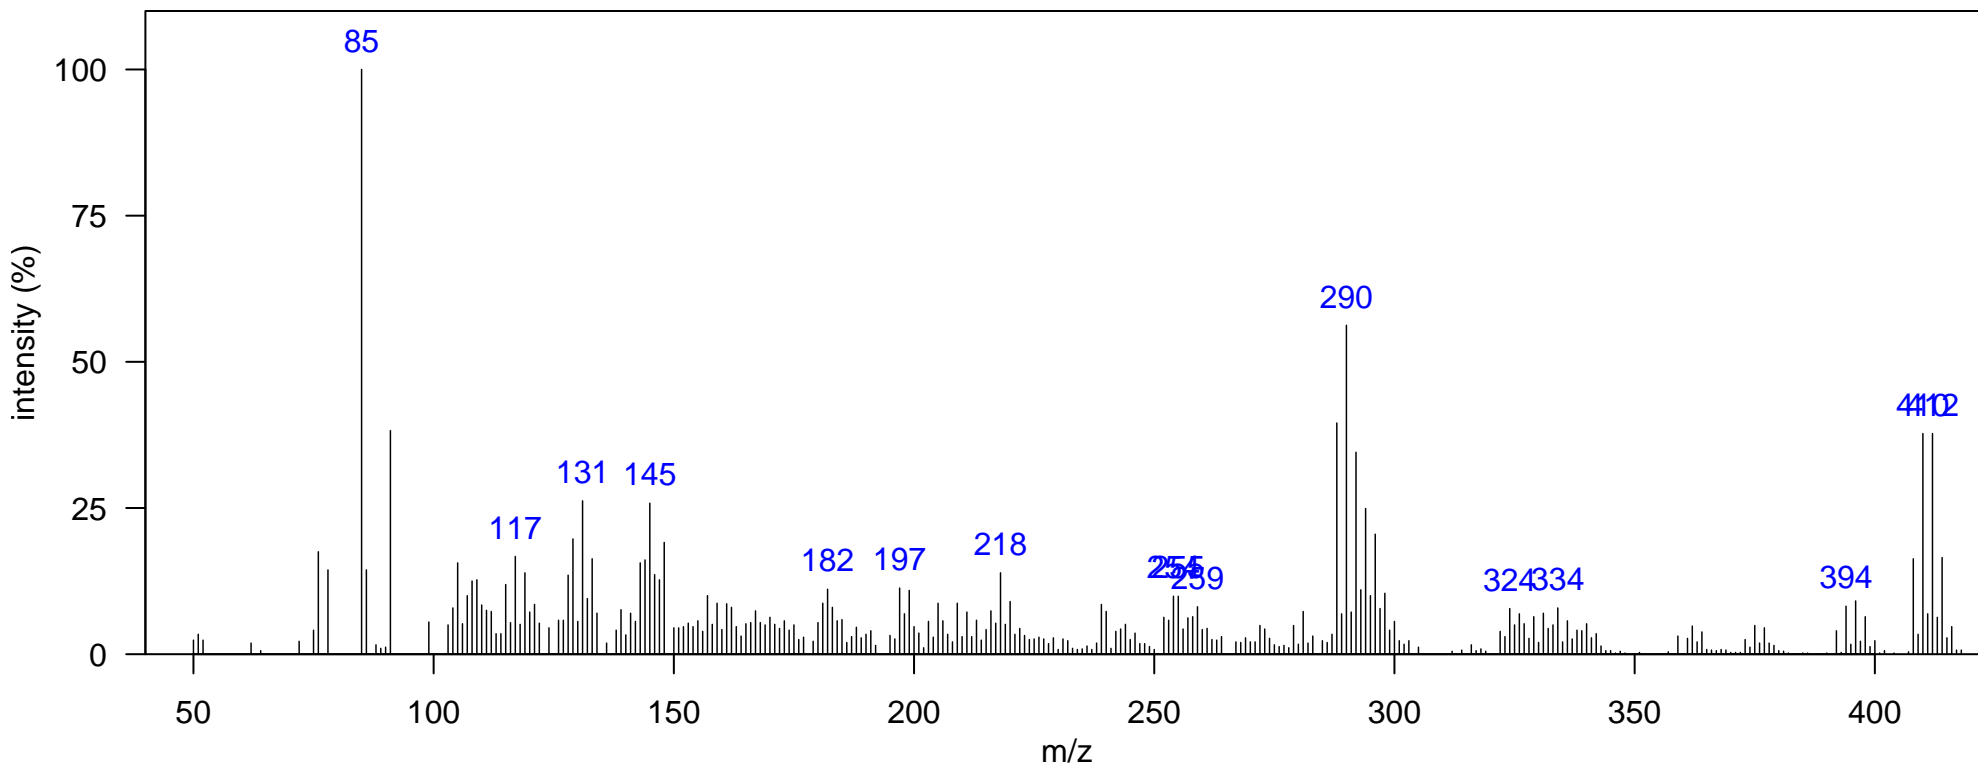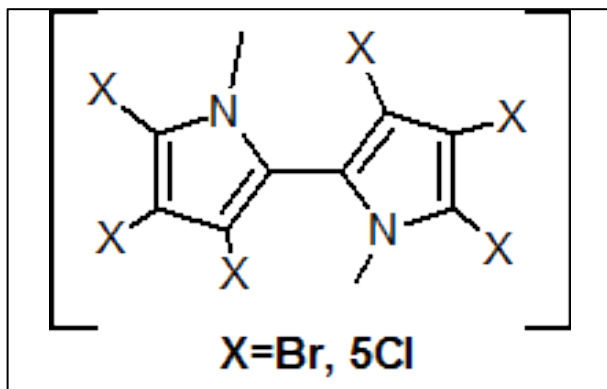

| m/z [Fragment]                            |
|-------------------------------------------|
| 288 [M-BrCNCH <sub>3</sub> ] <sup>+</sup> |
| 373 [M-Cl] <sup>+</sup>                   |
| 408 M <sup>+</sup>                        |

Name: DMBP Br2Cl4 1

Class: DMBP

Matrix: South Atlantic Dolphin Blubber  
In N. Atlantic: TRUE, In N. Pacific: TRUE  
Typically Monitored: FALSE  
Comment: DMBP Br2Cl4 (Pacific Library)

Instrument: GCxGC-TOF, EI, 70 eV  
1D RT, 2D RT (s): 1488.49, 1.115  
Quantitative Ion m/z: 458

Elemental Formula: C<sub>10</sub>H<sub>6</sub>Br<sub>2</sub>Cl<sub>4</sub>N<sub>2</sub>  
Source: natural  
Identification: Authentic MS RT

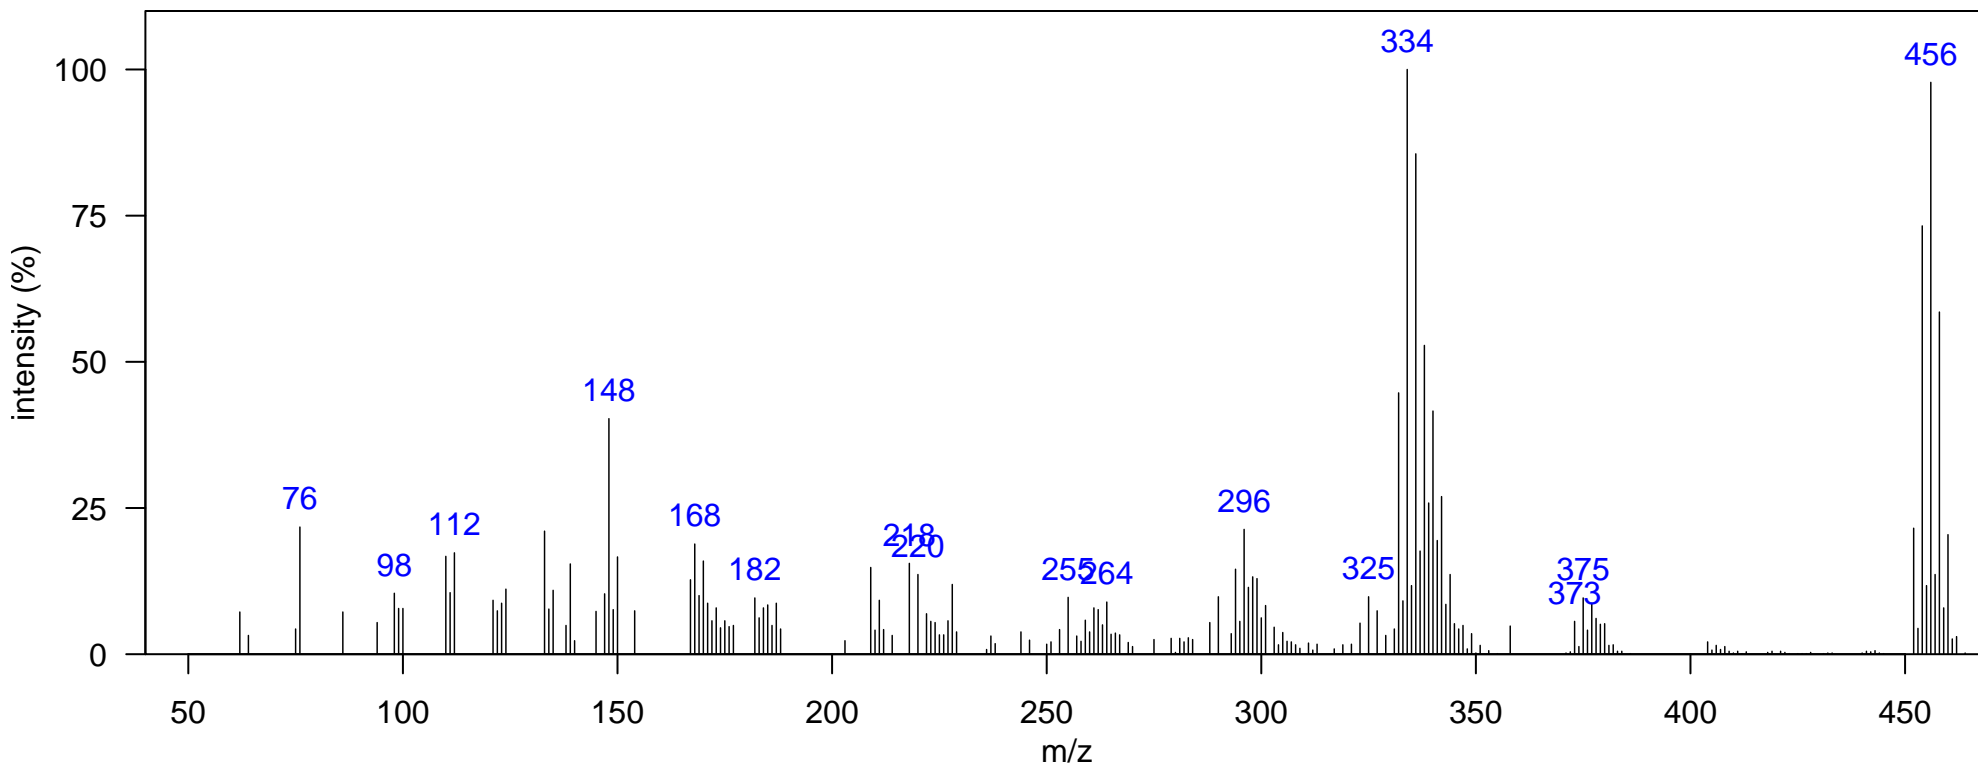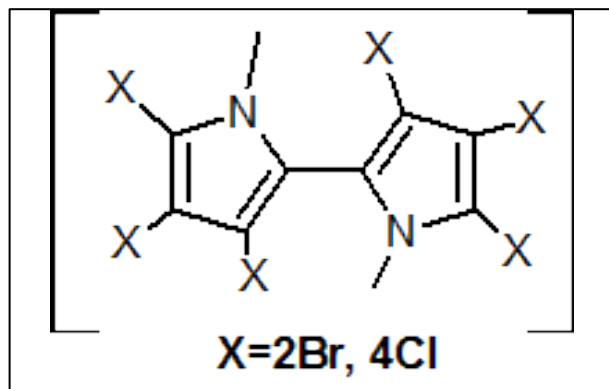

| m/z [Fragment]                            |
|-------------------------------------------|
| 332 [M-BrCNCH <sub>3</sub> ] <sup>+</sup> |
| 452 M <sup>+</sup>                        |

Name: DMBP Br2Cl4 2

Class: DMBP

Matrix: South Atlantic Dolphin Blubber  
In N. Atlantic: FALSE, In N. Pacific: FALSE  
Typically Monitored: FALSE  
Comment:

Instrument: GCxGC-TOF, EI, 70 eV  
1D RT, 2D RT (s): 1498.99, 1.148  
Quantitative Ion m/z: 458

Elemental Formula: C<sub>10</sub>H<sub>6</sub>Br<sub>2</sub>Cl<sub>4</sub>N<sub>2</sub>  
Source: natural  
Identification: Manual-Congener Group

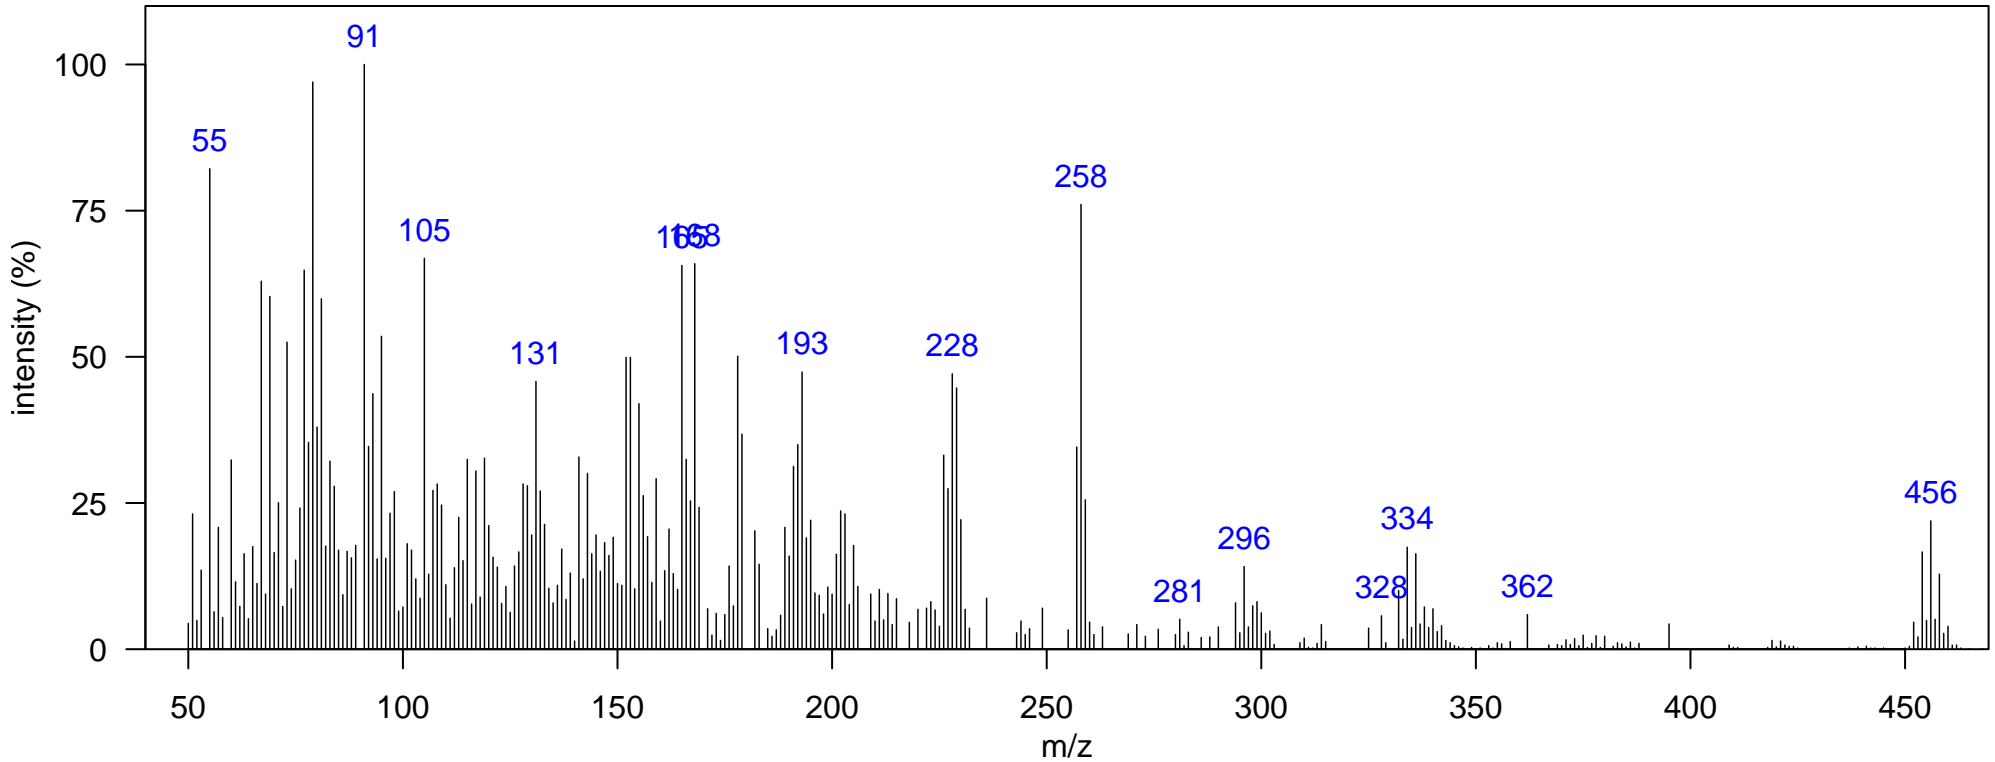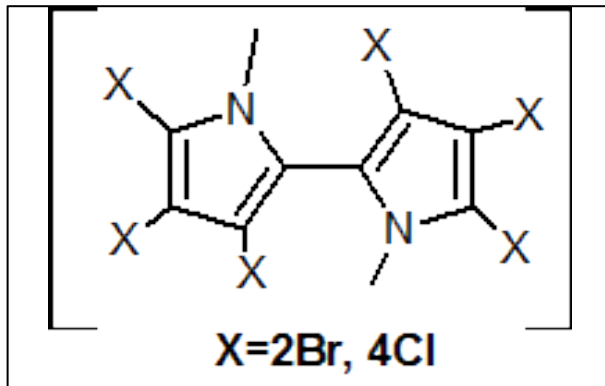

| m/z [Fragment]                            |
|-------------------------------------------|
| 332 [M-BrCNCH <sub>3</sub> ] <sup>+</sup> |
| 452 M <sup>+</sup>                        |

Name: DMBP Br2Cl4 3

Class: DMBP

Matrix: South Atlantic Dolphin Blubber  
In N. Atlantic: FALSE, In N. Pacific: FALSE  
Typically Monitored: FALSE  
Comment:

Instrument: GCxGC-TOF, EI, 70 eV  
1D RT, 2D RT (s): 1509.48, 1.188  
Quantitative Ion m/z: 458

Elemental Formula: C<sub>10</sub>H<sub>6</sub>Br<sub>2</sub>Cl<sub>4</sub>N<sub>2</sub>  
Source: natural  
Identification: Manual-Congener Group

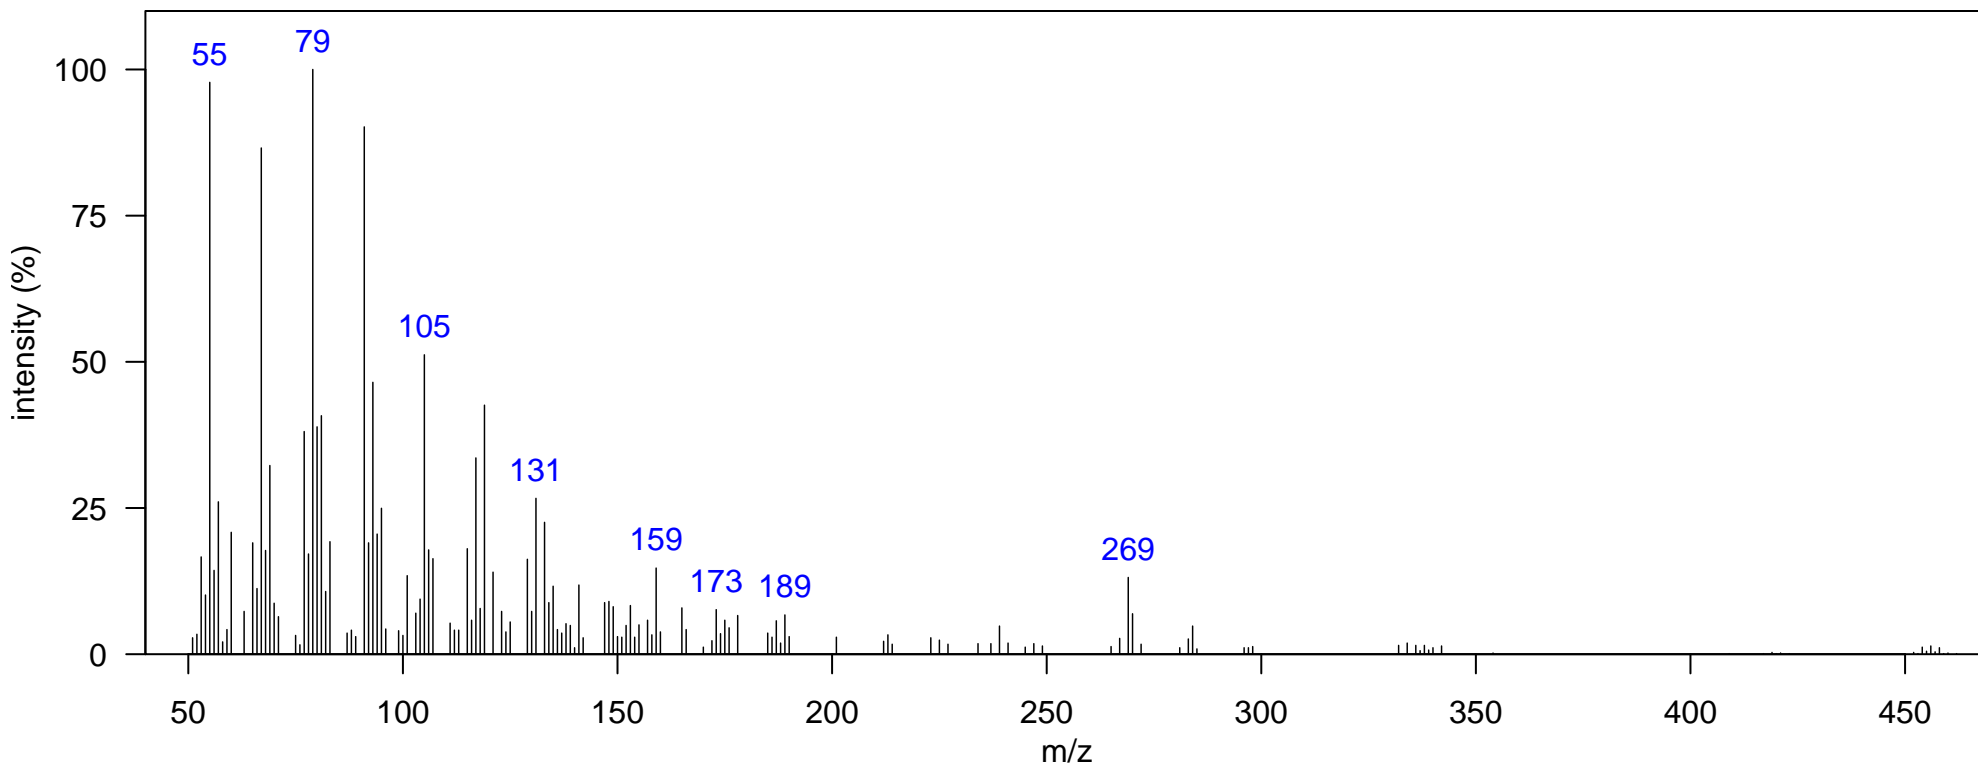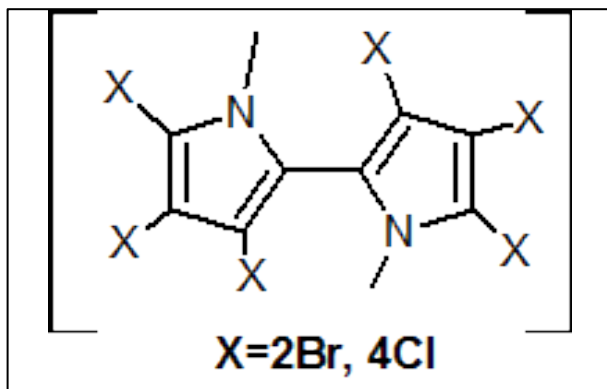

| m/z [Fragment]                            |
|-------------------------------------------|
| 332 [M-BrCNCH <sub>3</sub> ] <sup>+</sup> |
| 452 M <sup>+</sup>                        |

Name: DMBP Br3Cl3

Class: DMBP

Matrix: South Atlantic Dolphin Blubber  
In N. Atlantic: FALSE, In N. Pacific: TRUE  
Typically Monitored: FALSE  
Comment:

Instrument: GCxGC-TOF, EI, 70 eV  
1D RT, 2D RT (s): 1537.46, 1.221  
Quantitative Ion m/z: 500

Elemental Formula: C<sub>10</sub>H<sub>6</sub>Br<sub>3</sub>Cl<sub>3</sub>N<sub>2</sub>  
Source: natural  
Identification: Authentic MS RT

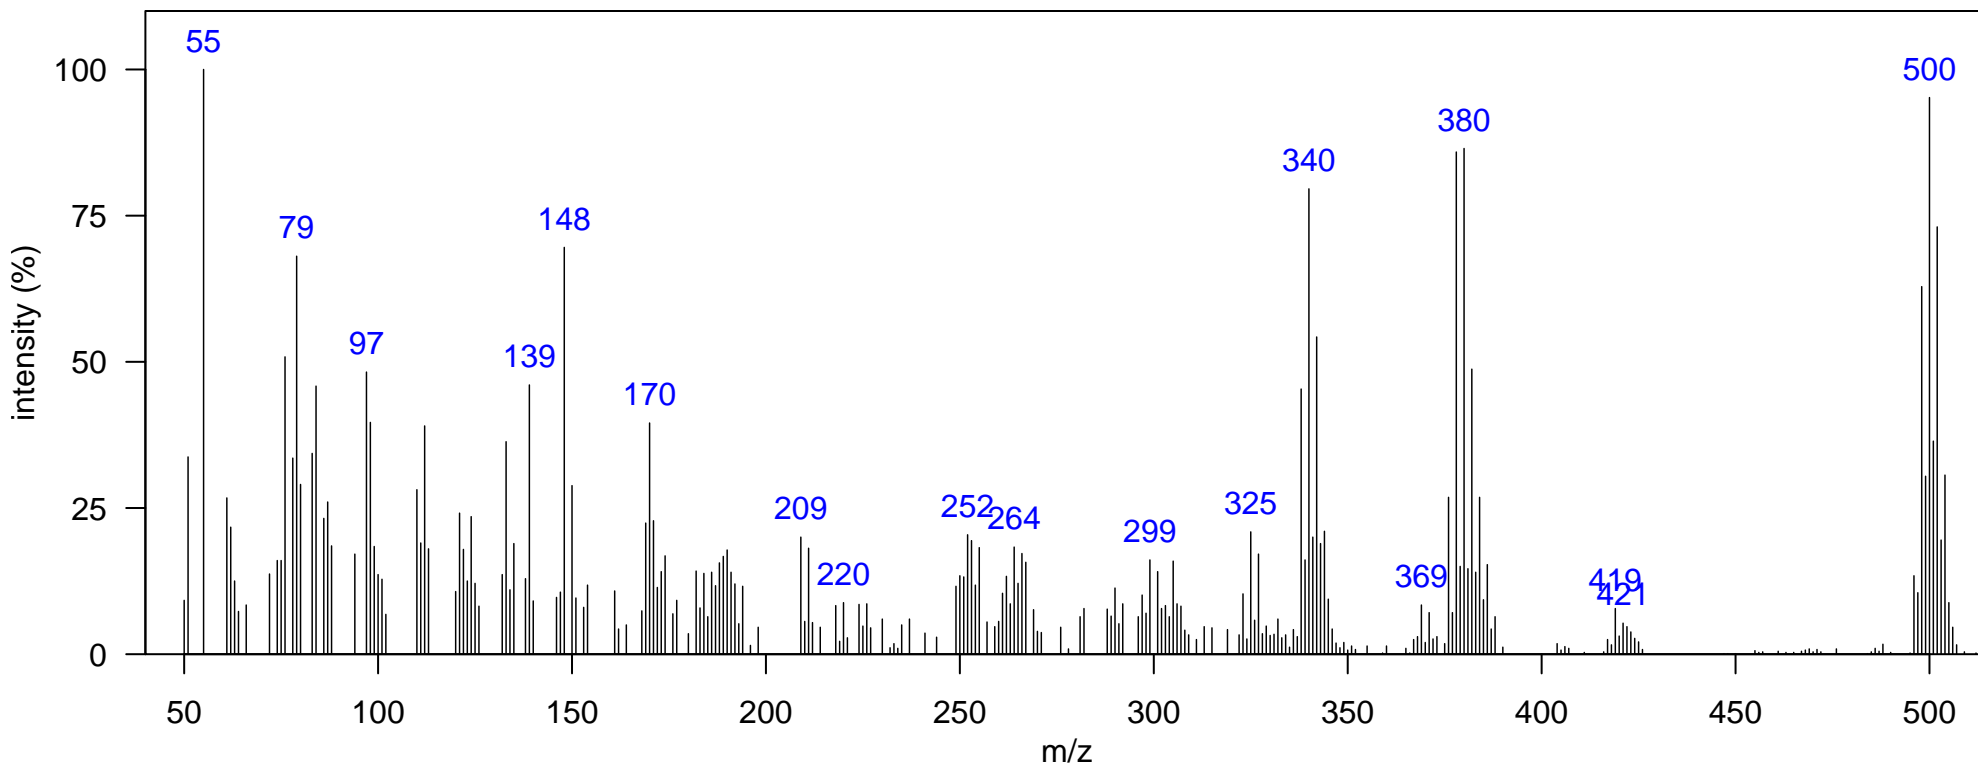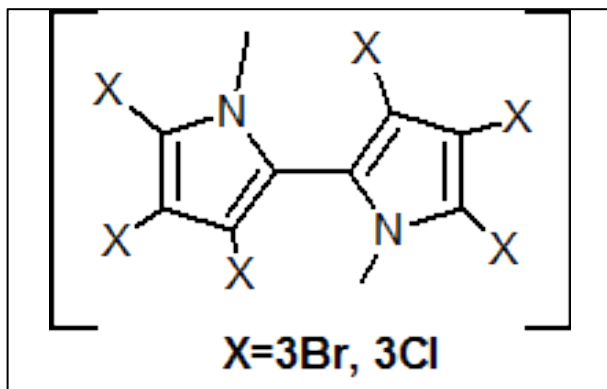

| m/z [Fragment]                            |
|-------------------------------------------|
| 338 [M-Br <sub>2</sub> ] <sup>+</sup>     |
| 376 [M-BrCNCH <sub>3</sub> ] <sup>+</sup> |
| 496 M <sup>+</sup>                        |

Name: DMBP Br4Cl2

Class: DMBP

Matrix: South Atlantic Dolphin Blubber  
In N. Atlantic: TRUE, In N. Pacific: TRUE  
Typically Monitored: FALSE  
Comment:

Instrument: GCxGC-TOF, EI, 70 eV  
1D RT, 2D RT (s): 1586.44, 1.393  
Quantitative Ion m/z: 546

Elemental Formula: C<sub>10</sub>H<sub>6</sub>Cl<sub>2</sub>Br<sub>4</sub>N<sub>2</sub>  
Source: natural  
Identification: Authentic MS RT

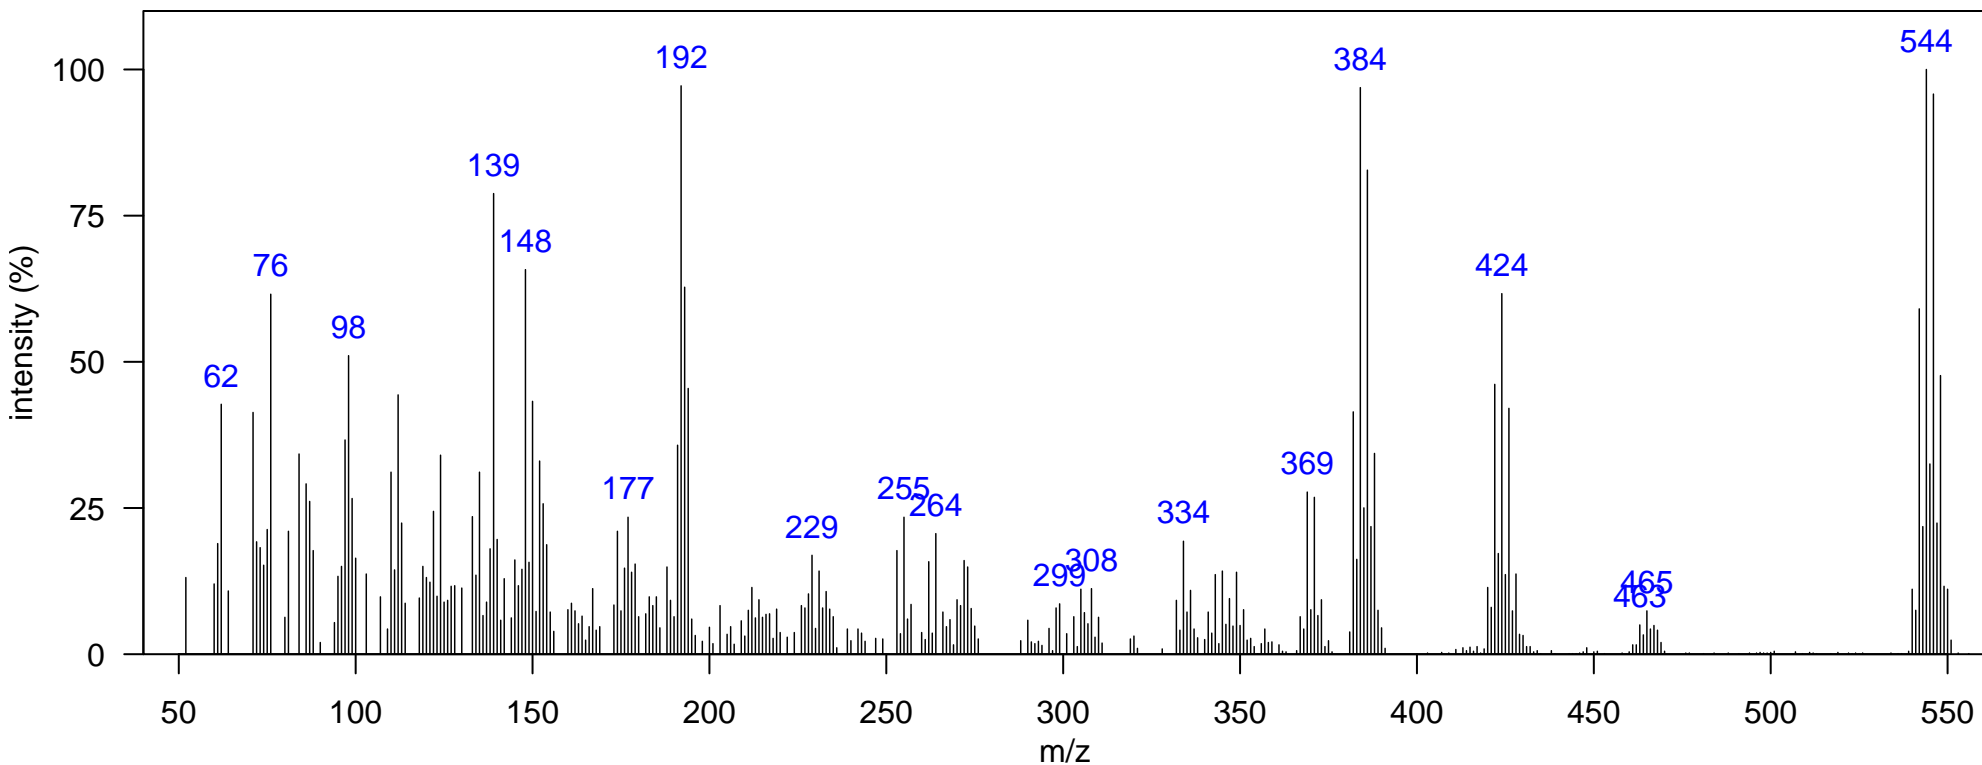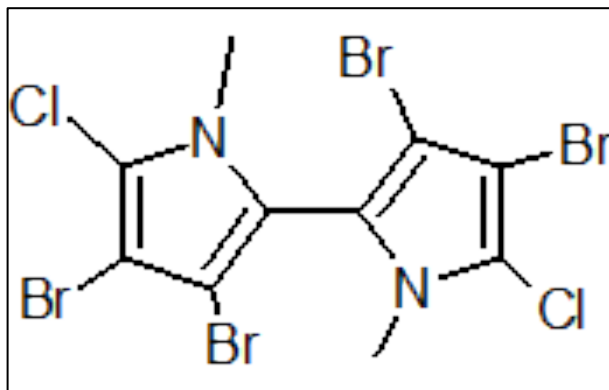

| m/z [Fragment]                            |
|-------------------------------------------|
| 382 [M-Br <sub>2</sub> ] <sup>+</sup>     |
| 420 [M-BrCNCH <sub>3</sub> ] <sup>+</sup> |
| 540 M <sup>+</sup>                        |

Name: DMBP 6Br

Class: DMBP

Matrix: South Atlantic Dolphin Blubber  
In N. Atlantic: TRUE, In N. Pacific: TRUE  
Typically Monitored: FALSE  
Comment:

Instrument: GCxGC-TOF, EI, 70 eV  
1D RT, 2D RT (s): 1722.86, 1.683  
Quantitative Ion m/z: 634

Elemental Formula: C<sub>10</sub>H<sub>6</sub>Br<sub>6</sub>N<sub>2</sub>  
Source: natural  
Identification: Authentic MS RT

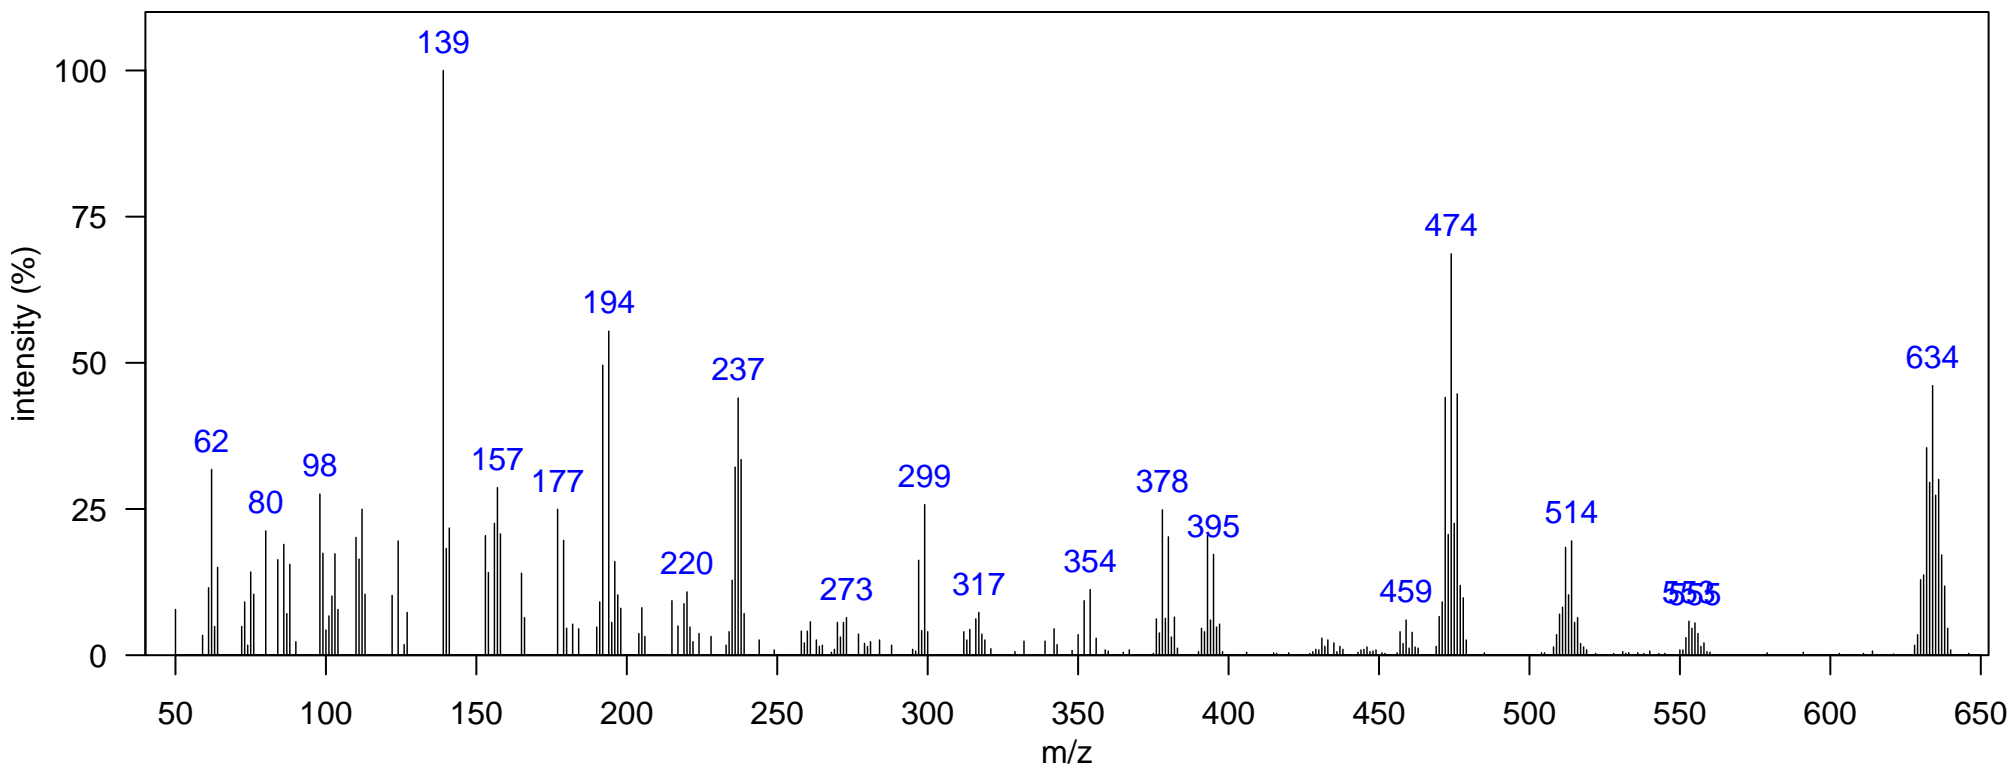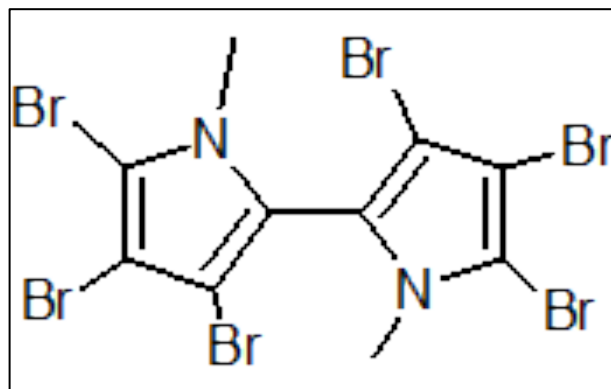

| m/z [Fragment]                            |
|-------------------------------------------|
| 470 [M-Br <sub>2</sub> ] <sup>+</sup>     |
| 508 [M-BrCNCH <sub>2</sub> ] <sup>+</sup> |
| 628 M <sup>+</sup>                        |

Name: MBP 6Cl 1

Class: MBP

Matrix: South Atlantic Dolphin Blubber  
In N. Atlantic: TRUE, In N. Pacific: TRUE  
Typically Monitored: FALSE  
Comment:

Instrument: GCxGC-TOF, EI, 70 eV  
1D RT, 2D RT (s): 1240.13, 0.911  
Quantitative Ion m/z: 352

Elemental Formula: C<sub>9</sub>H<sub>4</sub>Cl<sub>6</sub>N<sub>2</sub>  
Source: natural  
Identification: Authentic MS

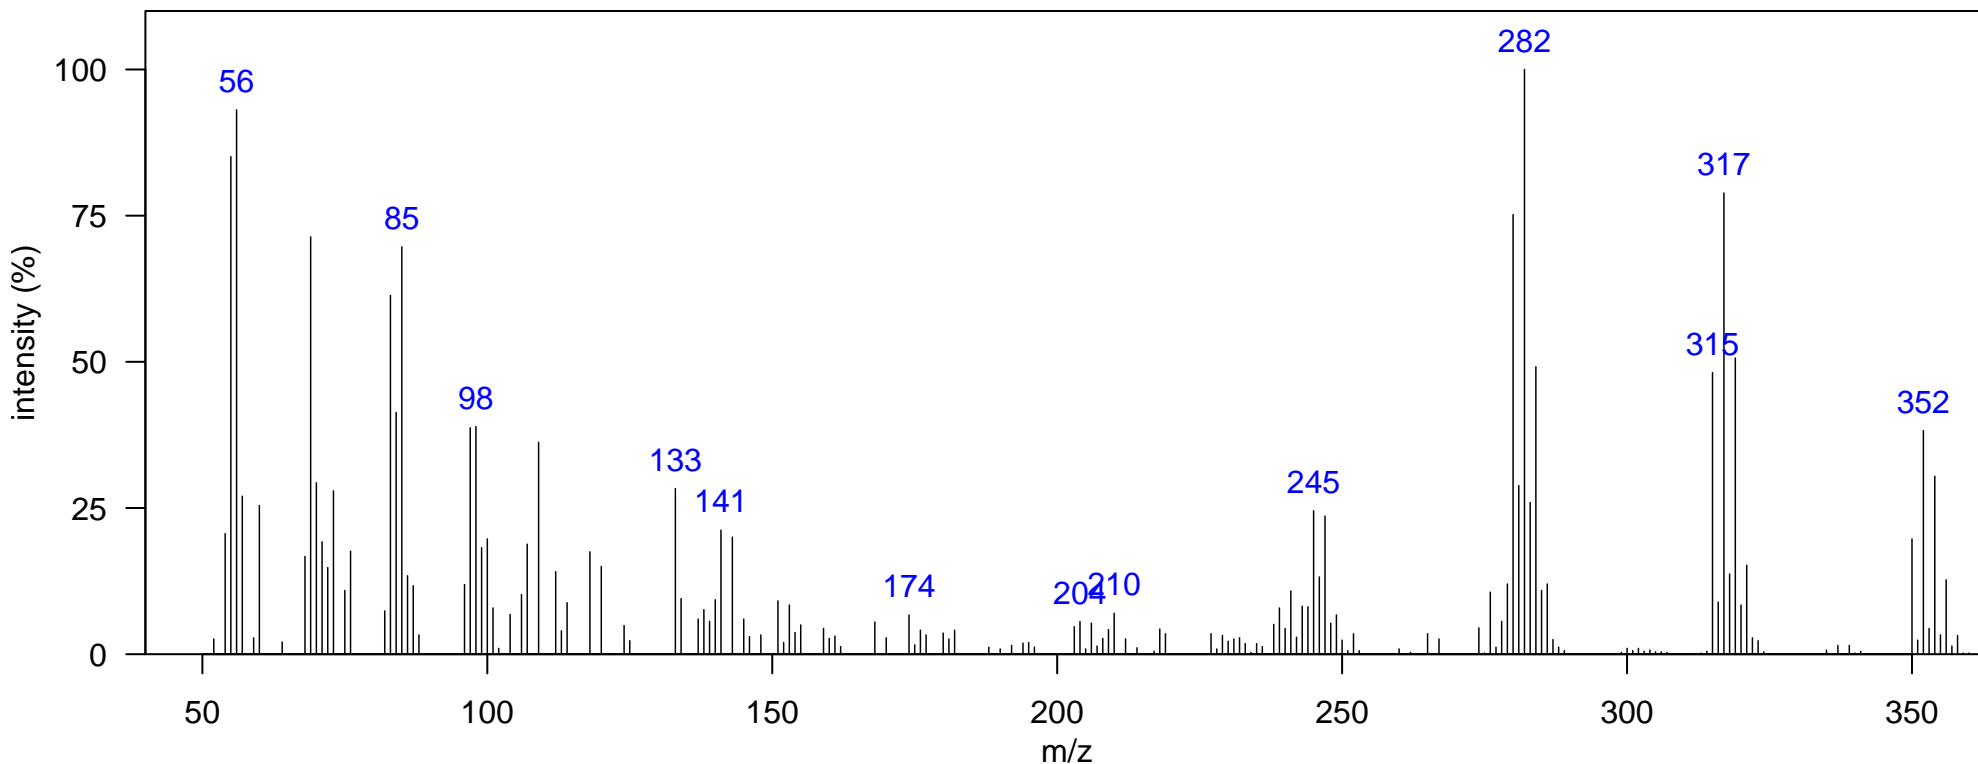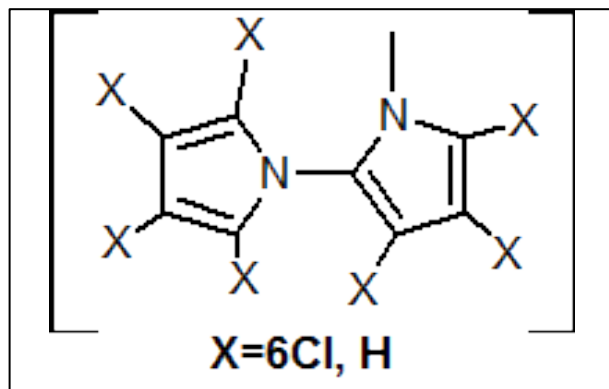

| m/z [Fragment]                        |
|---------------------------------------|
| 245 [M-Cl <sub>3</sub> ] <sup>+</sup> |
| 280 [M-Cl <sub>2</sub> ] <sup>+</sup> |
| 315 [M-Cl] <sup>+</sup>               |
| 350 M <sup>+</sup>                    |



Name: MBP 6Cl 2

Class: MBP

Matrix: South Atlantic Dolphin Blubber  
In N. Atlantic: TRUE, In N. Pacific: TRUE  
Typically Monitored: FALSE  
Comment:

Instrument: GCxGC-TOF, EI, 70 eV  
1D RT, 2D RT (s): 1254.13, 0.917  
Quantitative Ion m/z: 352

Elemental Formula: C<sub>9</sub>H<sub>4</sub>Cl<sub>6</sub>N<sub>2</sub>  
Source: natural  
Identification: Authentic MS

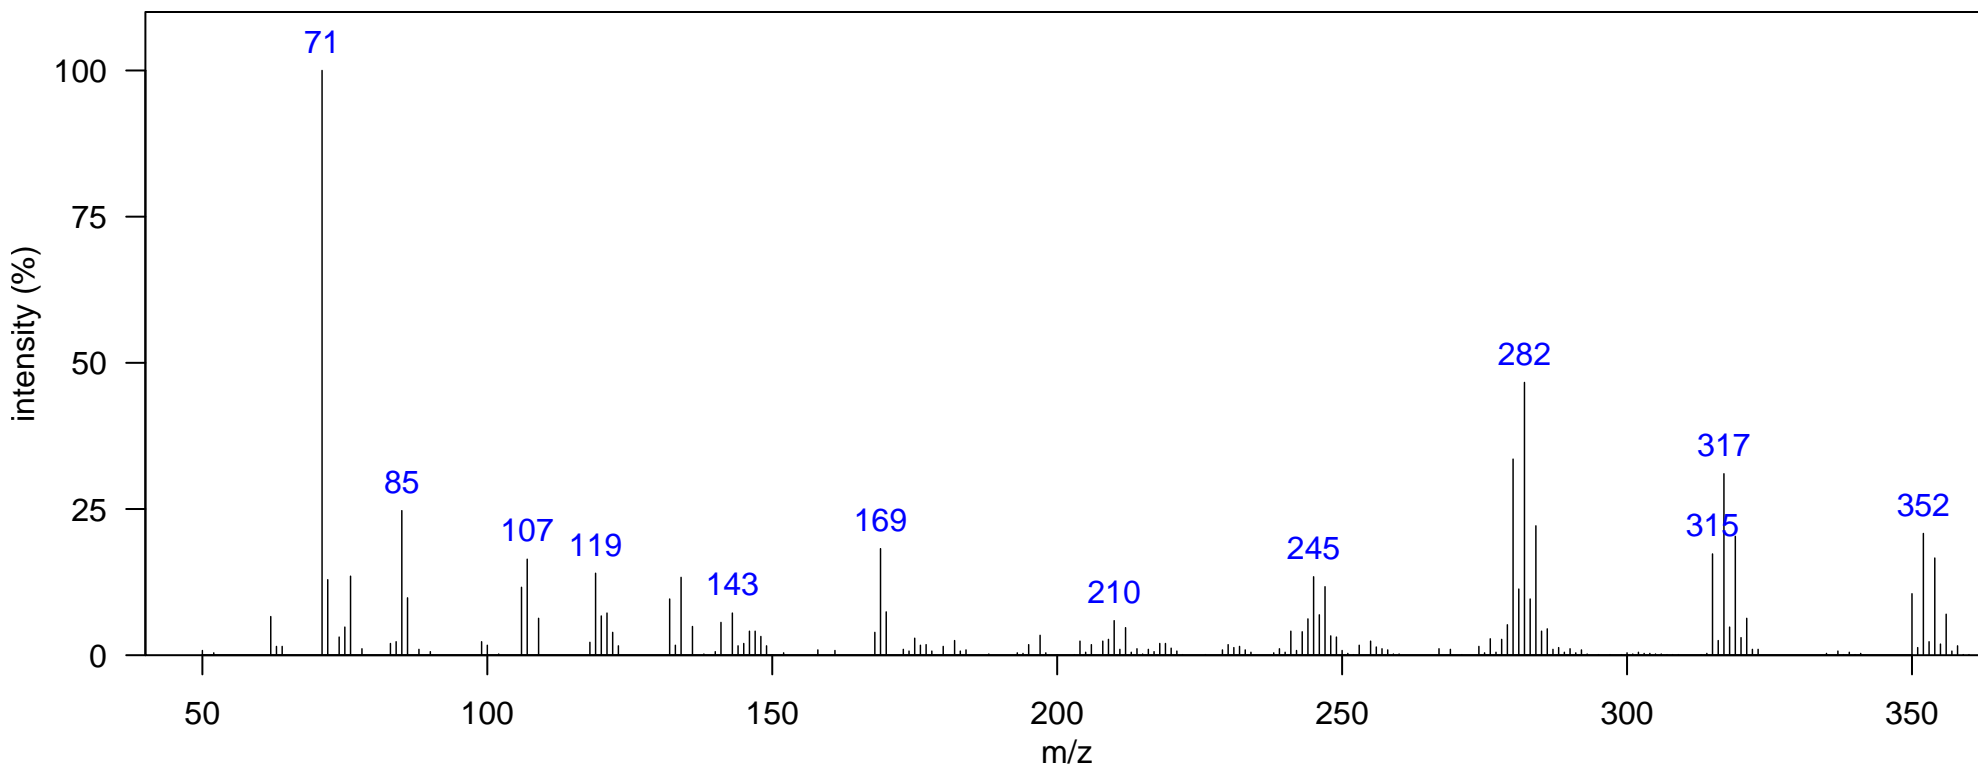

| m/z [Fragment]                        |
|---------------------------------------|
| 245 [M-Cl <sub>3</sub> ] <sup>+</sup> |
| 280 [M-Cl <sub>2</sub> ] <sup>+</sup> |
| 315 [M-Cl] <sup>+</sup>               |
| 350 M <sup>+</sup>                    |

Name: MBP 6Cl 3

Class: MBP

Matrix: South Atlantic Dolphin Blubber  
In N. Atlantic: FALSE, In N. Pacific: FALSE  
Typically Monitored: FALSE  
Comment:

Instrument: GCxGC-TOF, EI, 70 eV  
1D RT, 2D RT (s): 1292.6, 0.931  
Quantitative Ion m/z: 352

Elemental Formula: C<sub>9</sub>H<sub>4</sub>Cl<sub>6</sub>N<sub>2</sub>  
Source: natural  
Identification: Authentic MS

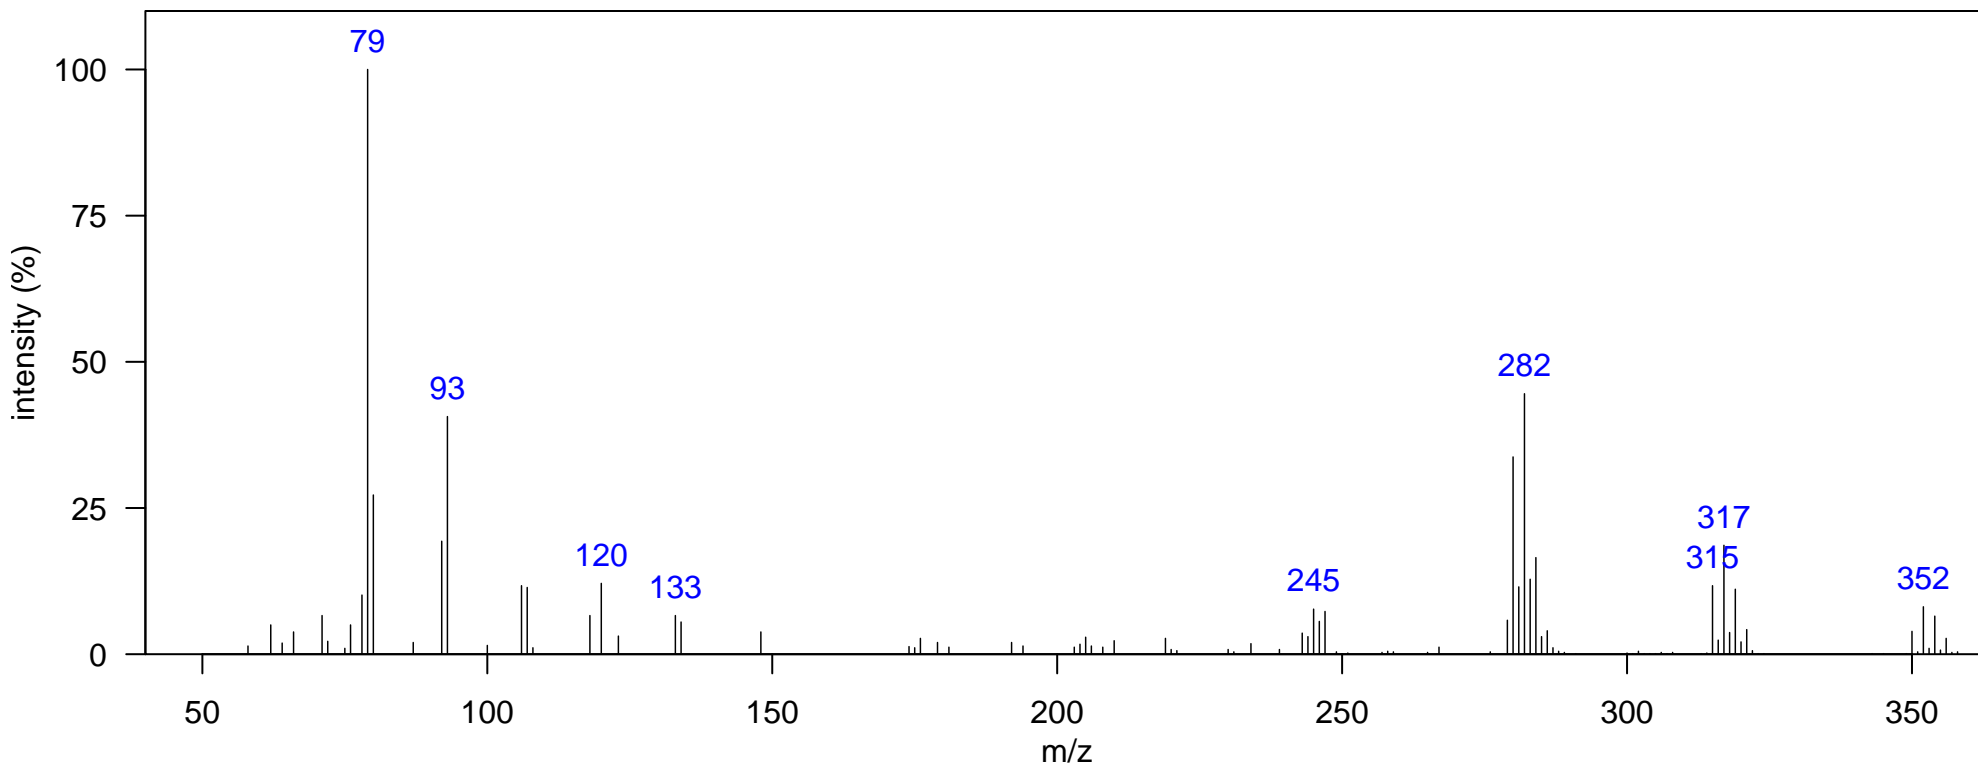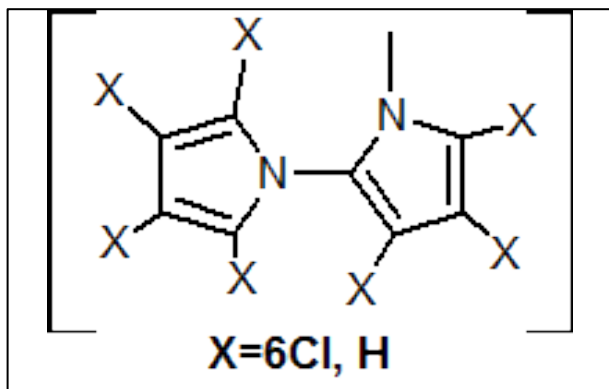

| m/z [Fragment]                        |
|---------------------------------------|
| 245 [M-Cl <sub>3</sub> ] <sup>+</sup> |
| 280 [M-Cl <sub>2</sub> ] <sup>+</sup> |
| 315 [M-Cl] <sup>+</sup>               |
| 350 M <sup>+</sup>                    |

Name: MBP 6Cl 4

Class: MBP

Matrix: South Atlantic Dolphin Blubber  
In N. Atlantic: FALSE, In N. Pacific: TRUE  
Typically Monitored: FALSE  
Comment: MBP 6Cl 3 (Pacific Library)

Instrument: GCxGC-TOF, EI, 70 eV  
1D RT, 2D RT (s): 1299.6, 0.97  
Quantitative Ion m/z: 352

Elemental Formula: C<sub>9</sub>H<sub>4</sub>Cl<sub>6</sub>N<sub>2</sub>  
Source: natural  
Identification: Manual-Congener Group

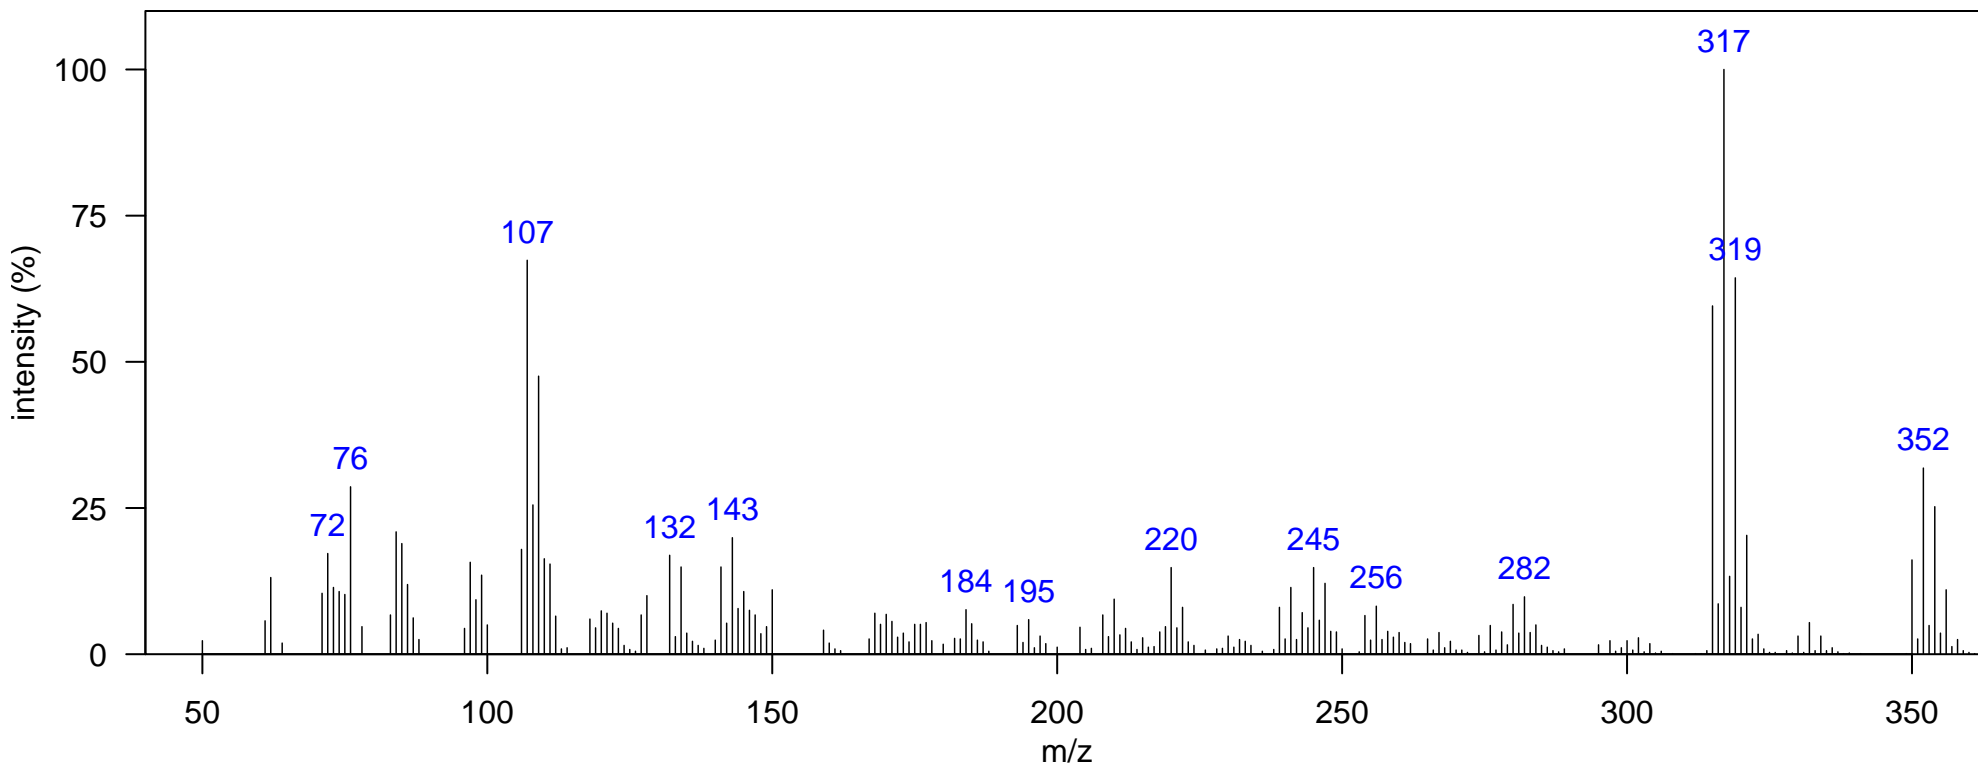

| m/z [Fragment]                        |
|---------------------------------------|
| 245 [M-Cl <sub>3</sub> ] <sup>+</sup> |
| 280 [M-Cl <sub>2</sub> ] <sup>+</sup> |
| 315 [M-Cl] <sup>+</sup>               |
| 350 M <sup>+</sup>                    |

Name: MBP 6Cl 5

Class: MBP

Matrix: South Atlantic Dolphin Blubber  
In N. Atlantic: FALSE, In N. Pacific: FALSE  
Typically Monitored: FALSE  
Comment:

Instrument: GCxGC-TOF, EI, 70 eV  
1D RT, 2D RT (s): 1334.58, 0.964  
Quantitative Ion m/z: 352

Elemental Formula: C<sub>9</sub>H<sub>4</sub>Cl<sub>6</sub>N<sub>2</sub>  
Source: natural  
Identification: Manual-Congener Group

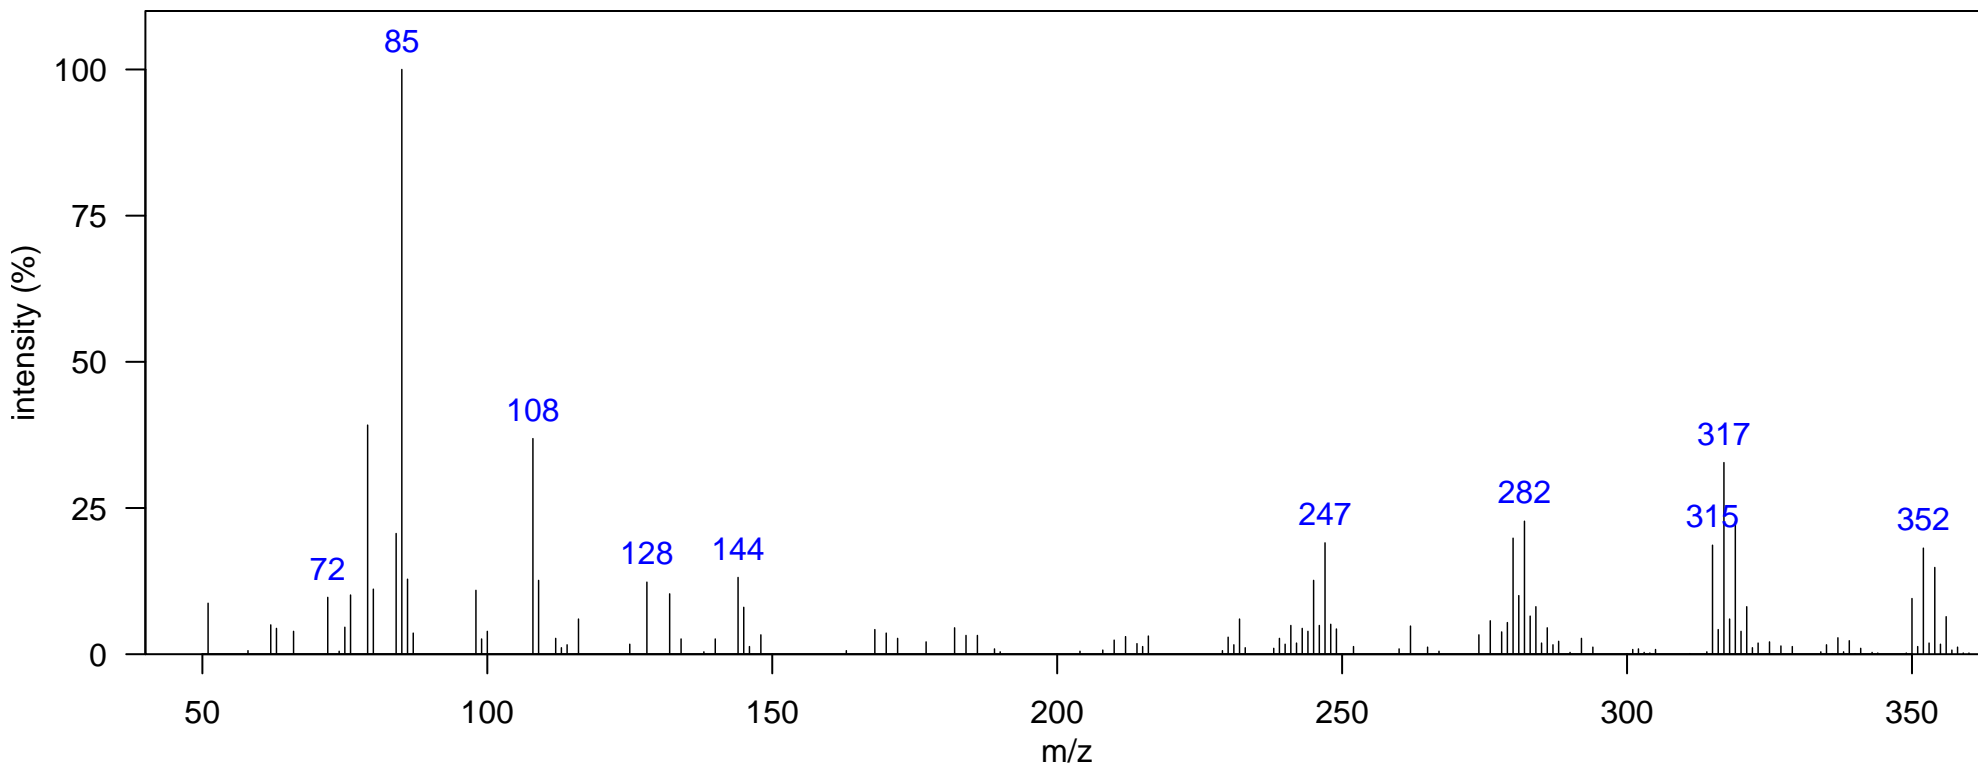

| m/z [Fragment]                        |
|---------------------------------------|
| 245 [M-Cl <sub>3</sub> ] <sup>+</sup> |
| 280 [M-Cl <sub>2</sub> ] <sup>+</sup> |
| 315 [M-Cl] <sup>+</sup>               |
| 350 M <sup>+</sup>                    |

Name: MBP 7Cl

Class: MBP

Matrix: South Atlantic Dolphin Blubber  
In N. Atlantic: TRUE, In N. Pacific: TRUE  
Typically Monitored: FALSE  
Comment:

Instrument: GCxGC-TOF, EI, 70 eV  
1D RT, 2D RT (s): 1341.58, 0.997  
Quantitative Ion m/z: 388

Elemental Formula: C<sub>9</sub>H<sub>3</sub>Cl<sub>7</sub>N<sub>2</sub>  
Source: natural  
Identification: Authentic MS RT

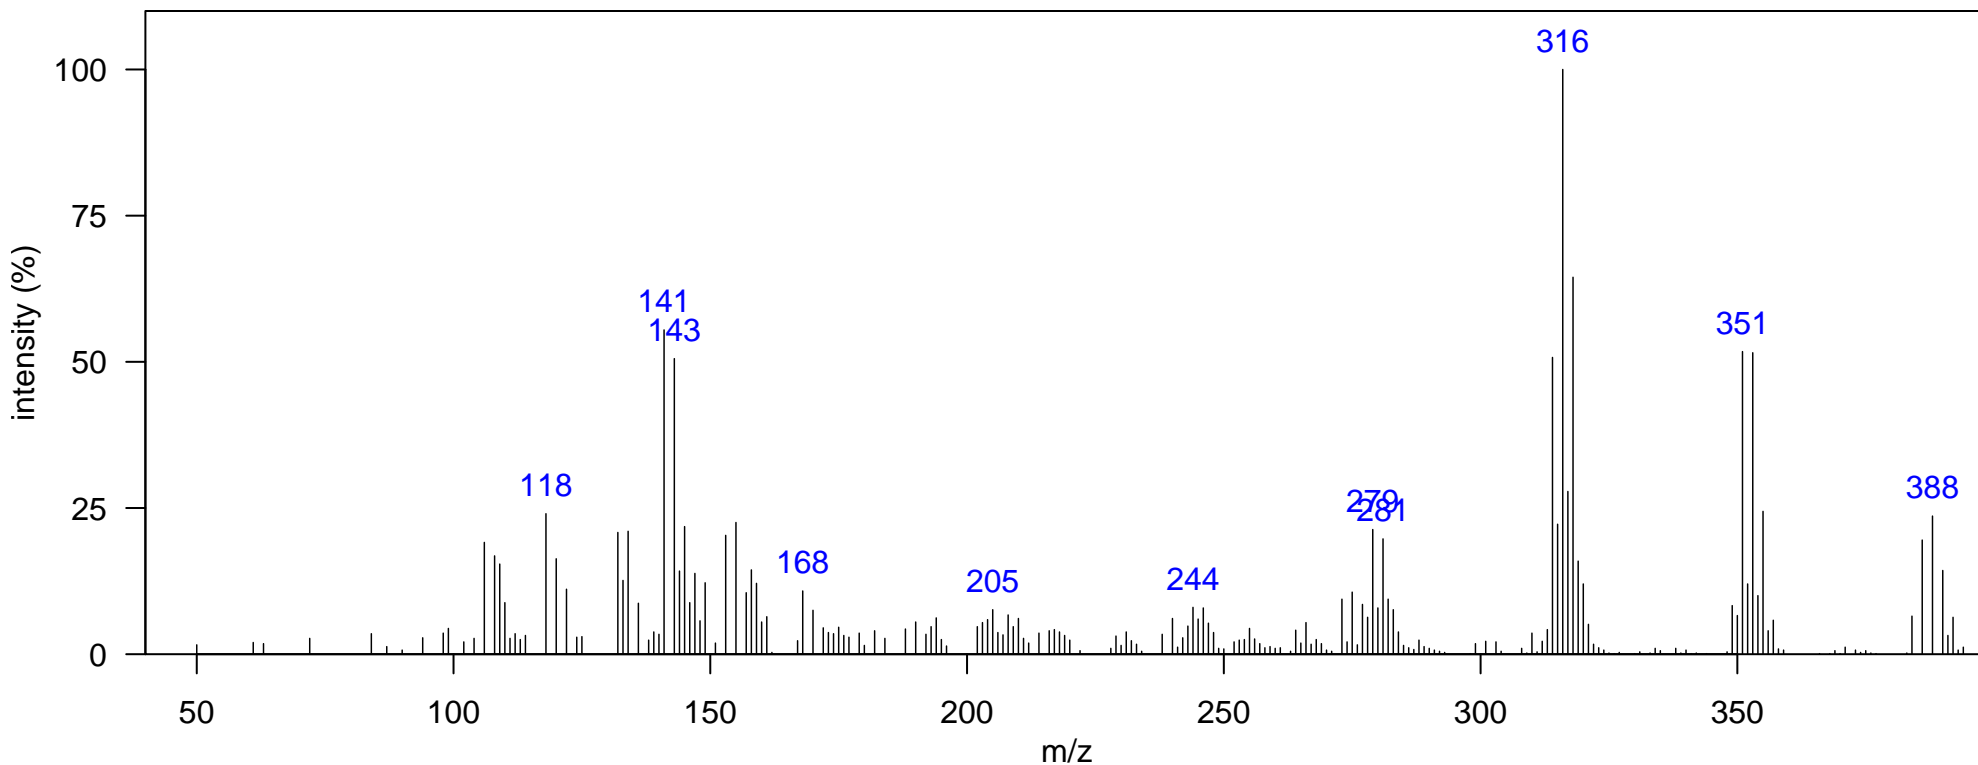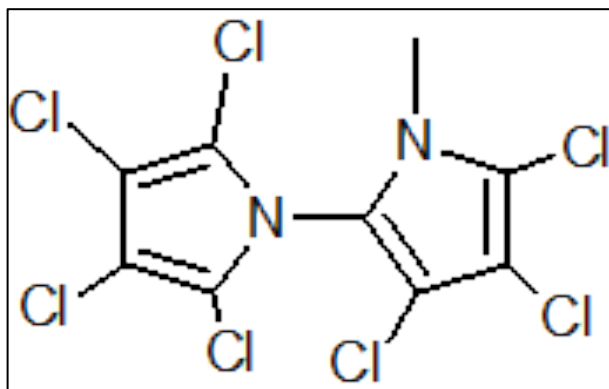

| m/z [Fragment]                        |
|---------------------------------------|
| 314 [M-Cl <sub>2</sub> ] <sup>+</sup> |
| 349 [M-Cl] <sup>+</sup>               |
| 384 M <sup>+</sup>                    |

Name: 5-bromoindole

Class: Brominated indole

Matrix: South Atlantic Dolphin Blubber  
In N. Atlantic: TRUE, In N. Pacific: TRUE  
Typically Monitored: FALSE  
Comment:

Instrument: GCxGC-TOF, EI, 70 eV  
1D RT, 2D RT (s): 1040.75, 1.003  
Quantitative Ion m/z: 195

Elemental Formula: C<sub>8</sub>H<sub>6</sub>BrN  
Source: natural  
Identification: Authentic MS RT

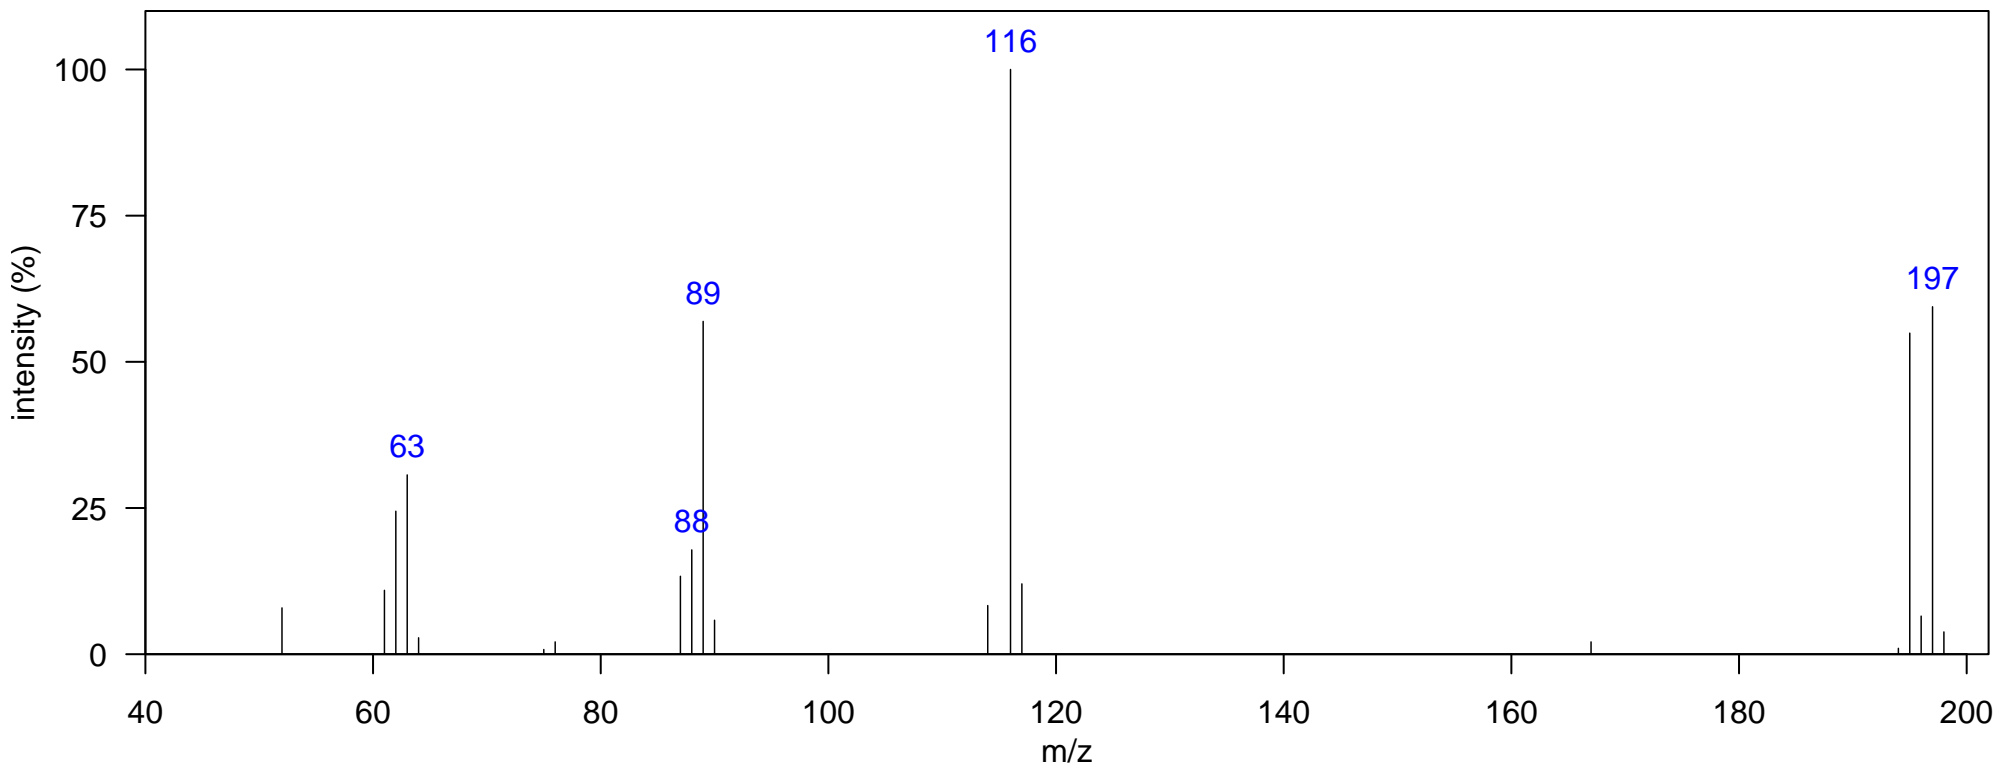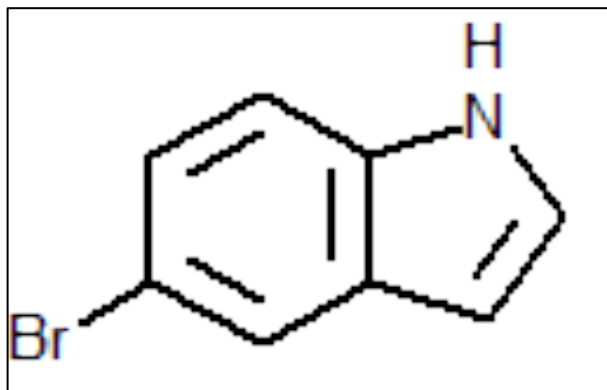

| m/z [Fragment]                          |
|-----------------------------------------|
| 89 [M-Br-CN <sup>H</sup> ] <sup>+</sup> |
| 116 [M-Br] <sup>+</sup>                 |
| 195 M <sup>+</sup>                      |

Name: 4,6-dibromoindole

Class: Brominated indole

Matrix: South Atlantic Dolphin Blubber  
In N. Atlantic: TRUE, In N. Pacific: TRUE  
Typically Monitored: FALSE  
Comment:

Instrument: GCxGC-TOF, EI, 70 eV  
1D RT, 2D RT (s): 1261.12, 1.129  
Quantitative Ion m/z: 275

Elemental Formula: C<sub>8</sub>H<sub>5</sub>Br<sub>2</sub>N  
Source: natural  
Identification: Authentic MS RT

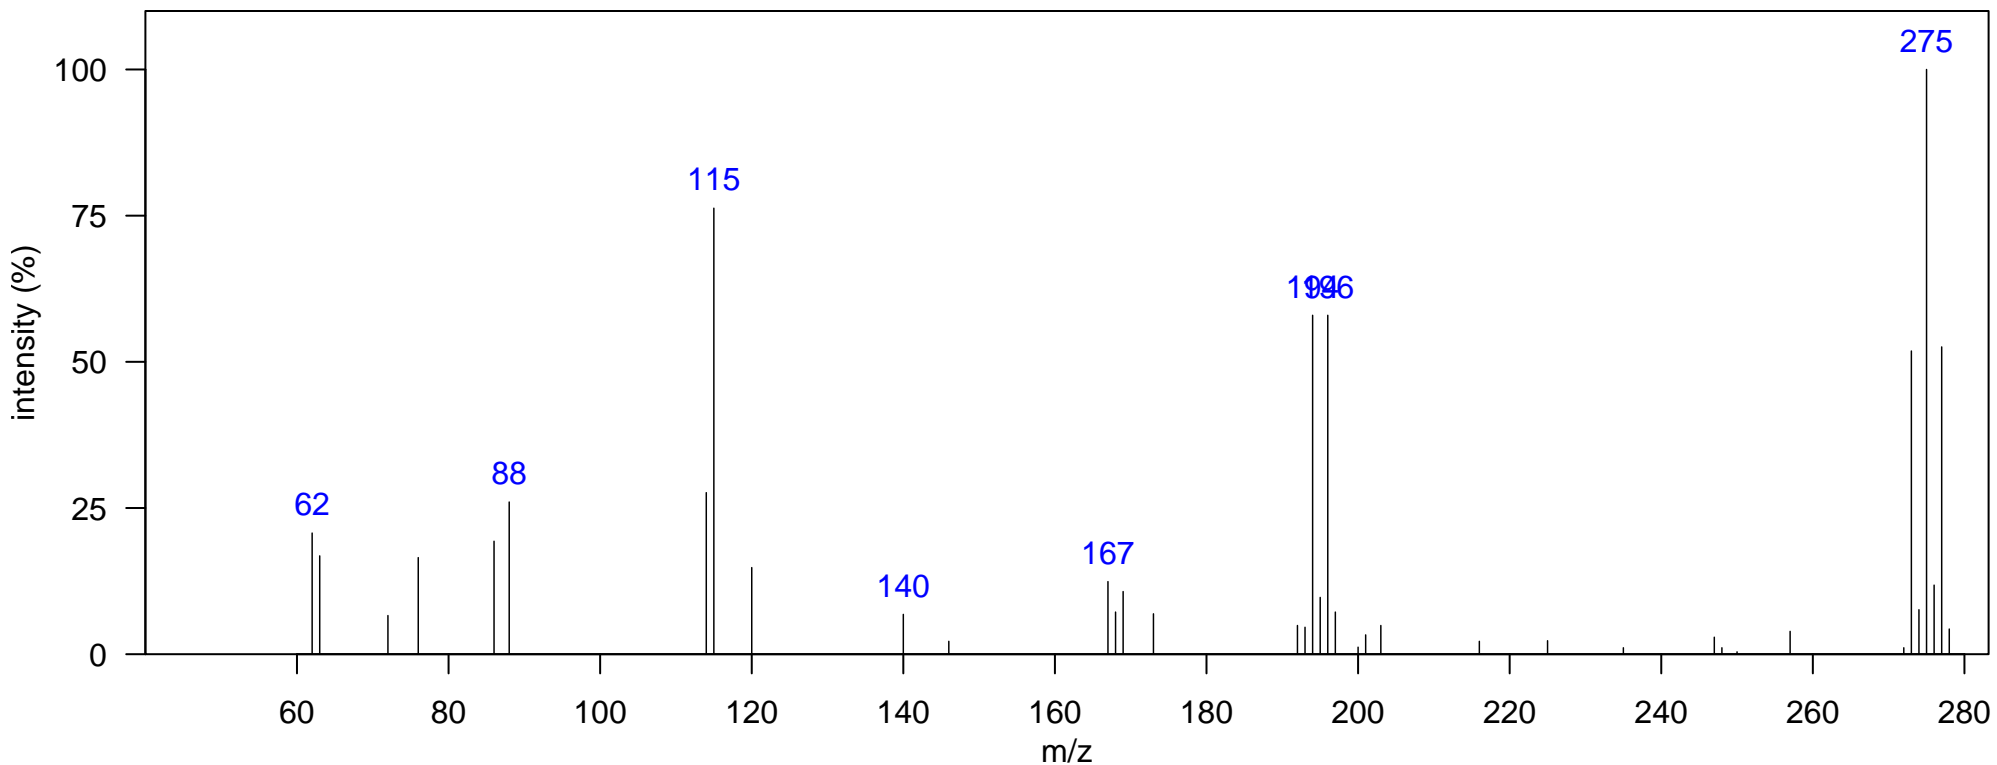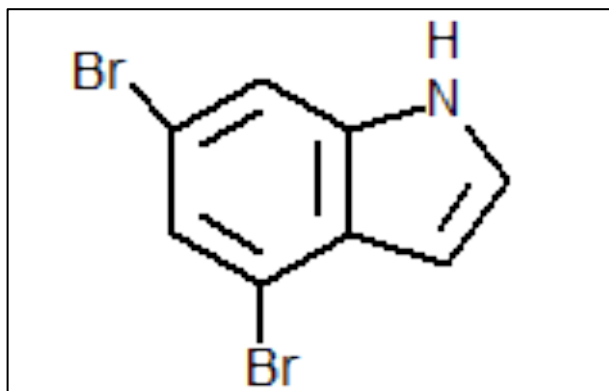

| m/z [Fragment]          |
|-------------------------|
| 194 [M-Br] <sup>+</sup> |
| 273 M <sup>+</sup>      |

Name: 2,4,6-tribromo anisole

Class: Brominated anisole

Matrix: South Atlantic Dolphin Blubber  
In N. Atlantic: TRUE, In N. Pacific: TRUE  
Typically Monitored: FALSE  
Comment:

Instrument: GCxGC-TOF, EI, 70 eV  
1D RT, 2D RT (s): 1033.75, 0.898  
Quantitative Ion m/z: 331

Elemental Formula: C<sub>7</sub>H<sub>5</sub>Br<sub>3</sub>O  
Source: mixed  
Identification: Authentic MS RT

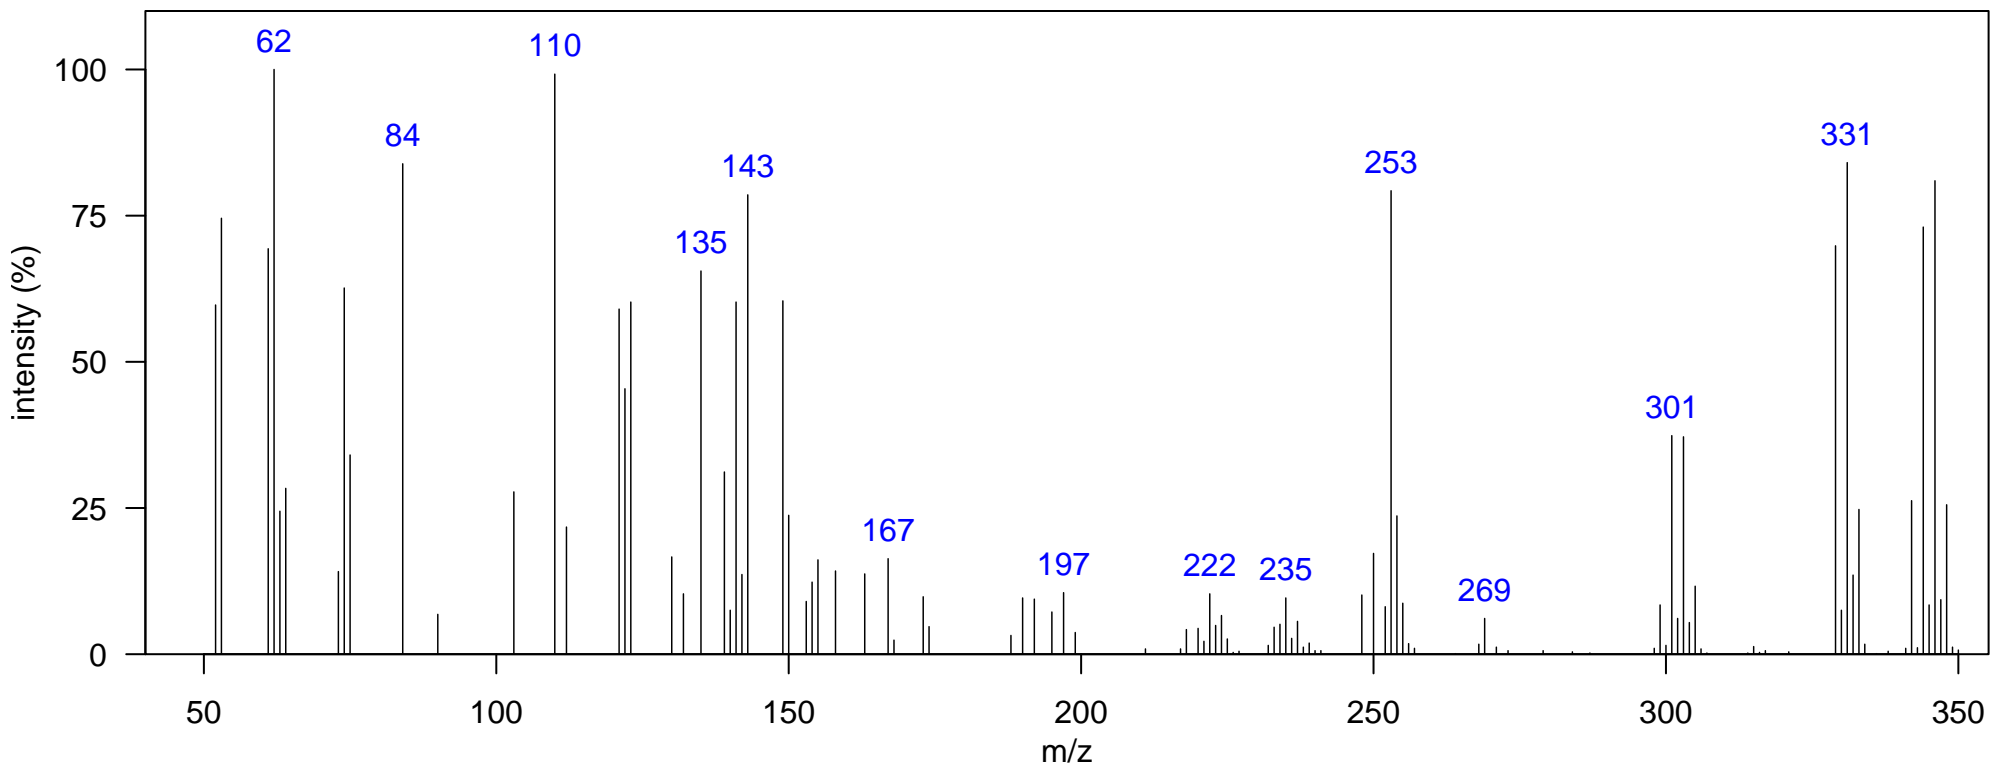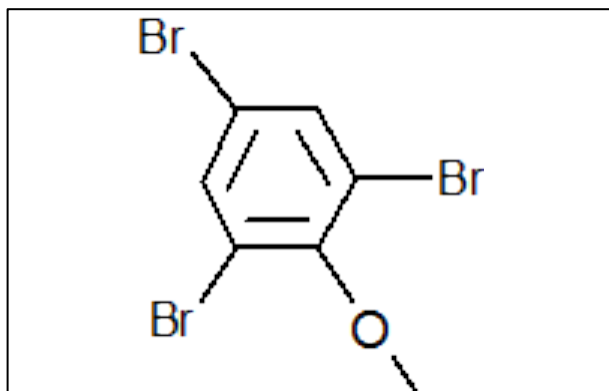

| m/z [Fragment]                           |
|------------------------------------------|
| 299 [M-CH <sub>3</sub> -CO] <sup>+</sup> |
| 327 [M-CH <sub>3</sub> ] <sup>+</sup>    |
| 342 M <sup>+</sup>                       |



Name: bromophenol

Class: Bromophenol-M

Matrix: South Atlantic Dolphin Blubber  
In N. Atlantic: FALSE, In N. Pacific: FALSE  
Typically Monitored: FALSE  
Comment:

Instrument: GCxGC-TOF, EI, 70 eV  
1D RT, 2D RT (s): 799.386, 0.858  
Quantitative Ion m/z: 172

Elemental Formula: C<sub>6</sub>H<sub>5</sub>BrO  
Source: mixed  
Identification: Reference Database MS

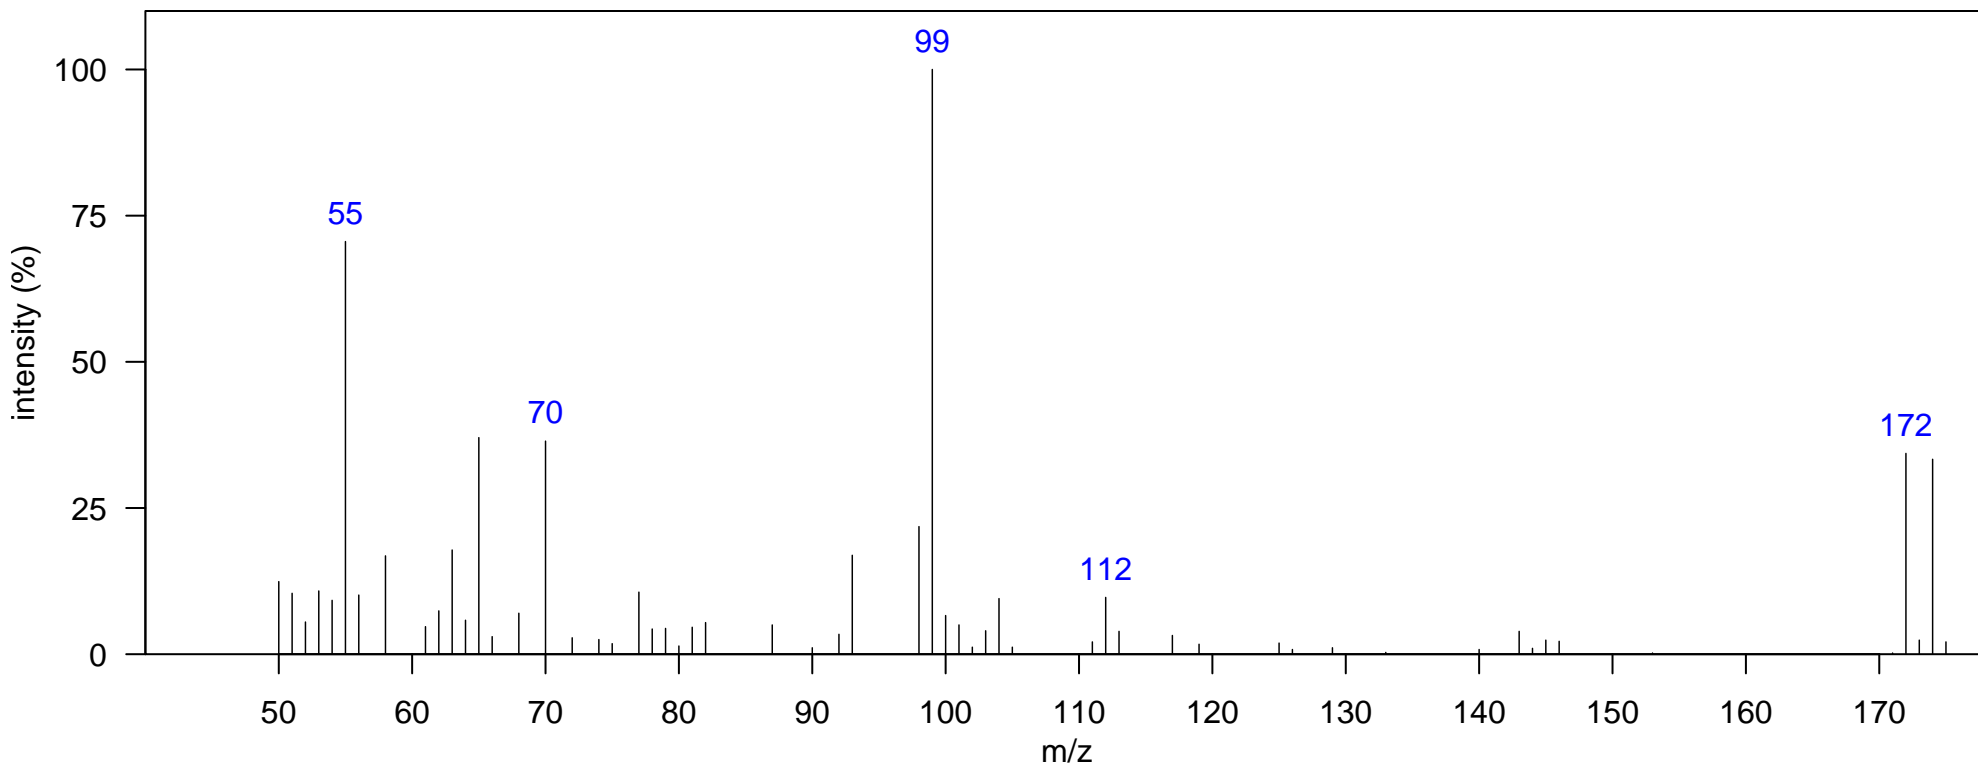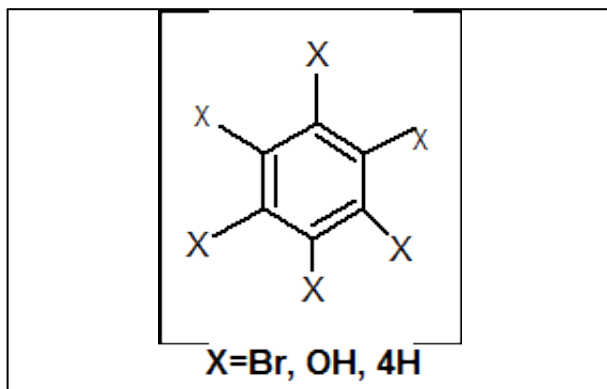

| m/z [Fragment]       |
|----------------------|
| 172 [M] <sup>+</sup> |

Name: tribromophenol

Class: Bromophenol-M

Matrix: South Atlantic Dolphin Blubber  
In N. Atlantic: TRUE, In N. Pacific: FALSE  
Typically Monitored: FALSE  
Comment:

Instrument: GCxGC-TOF, EI, 70 eV  
1D RT, 2D RT (s): 1051.24, 0.937  
Quantitative Ion m/z: 330

Elemental Formula: C<sub>6</sub>H<sub>3</sub>Br<sub>3</sub>O  
Source: mixed  
Identification: Reference Database MS

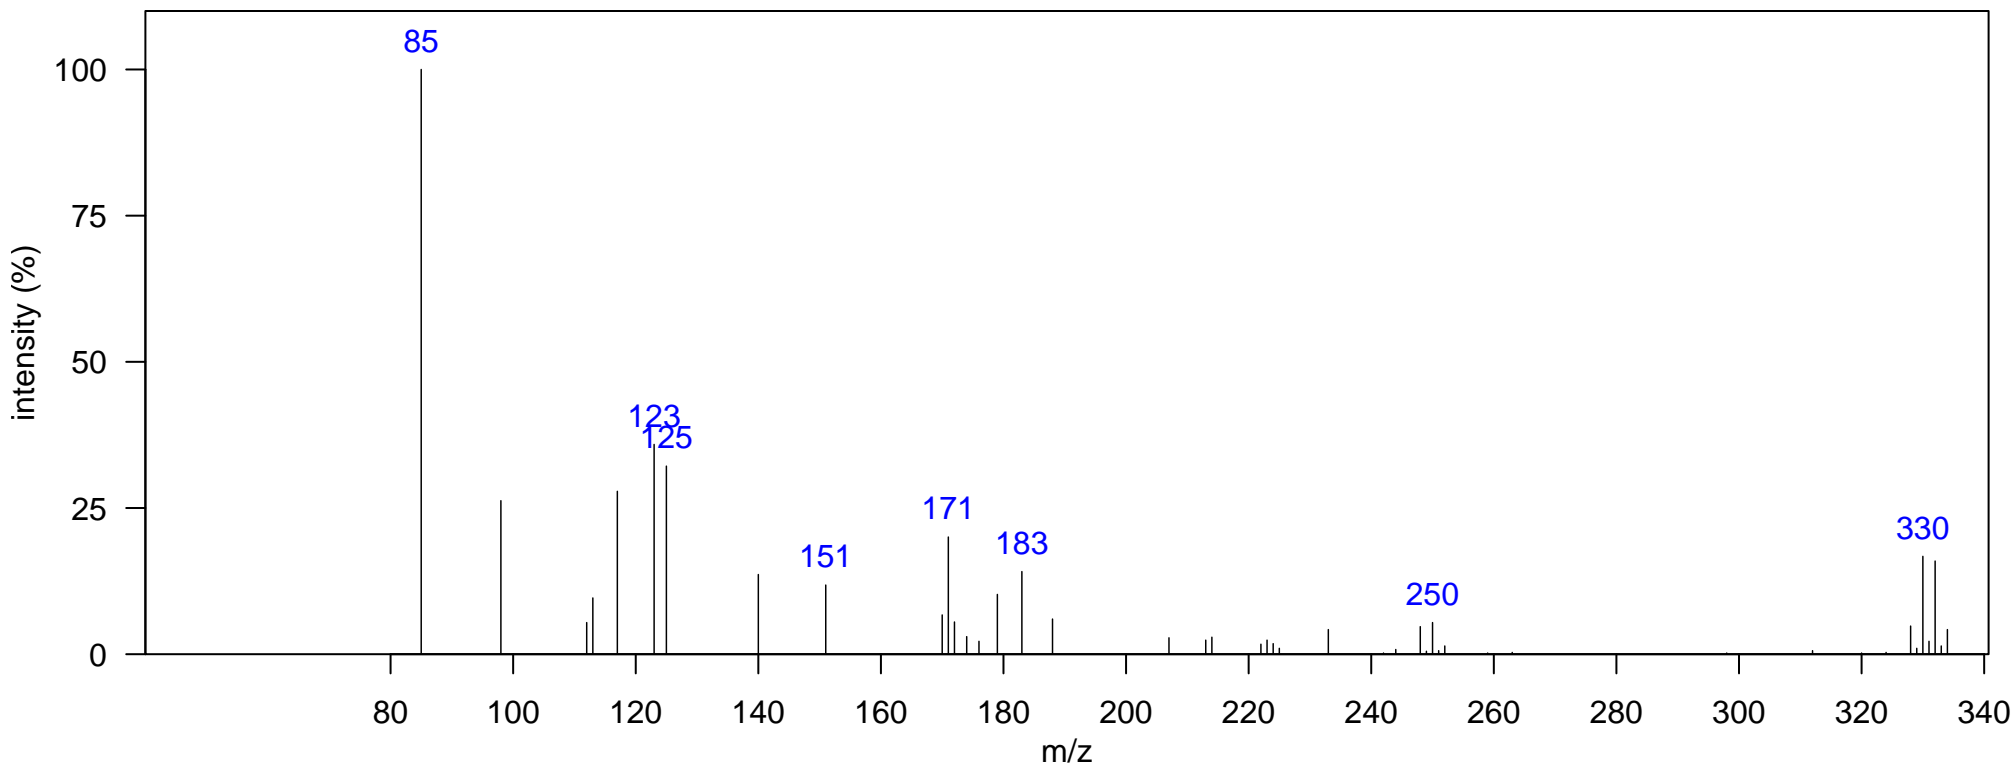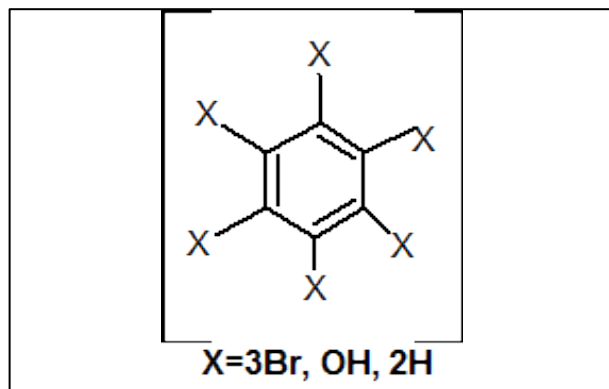

| m/z [Fragment]                        |
|---------------------------------------|
| 248 [M-Br <sub>2</sub> ] <sup>+</sup> |
| 330 [M-Br <sub>3</sub> ] <sup>+</sup> |

Name: dibromophenol

Class: Bromophenol-U

Matrix: South Atlantic Dolphin Blubber  
In N. Atlantic: FALSE, In N. Pacific: FALSE  
Typically Monitored: FALSE  
Comment:

Instrument: GCxGC-TOF, EI, 70 eV  
1D RT, 2D RT (s): 834.366, 0.865  
Quantitative Ion m/z: 252

Elemental Formula: C<sub>6</sub>H<sub>4</sub>Br<sub>2</sub>O  
Source: unknown  
Identification: Reference Database MS

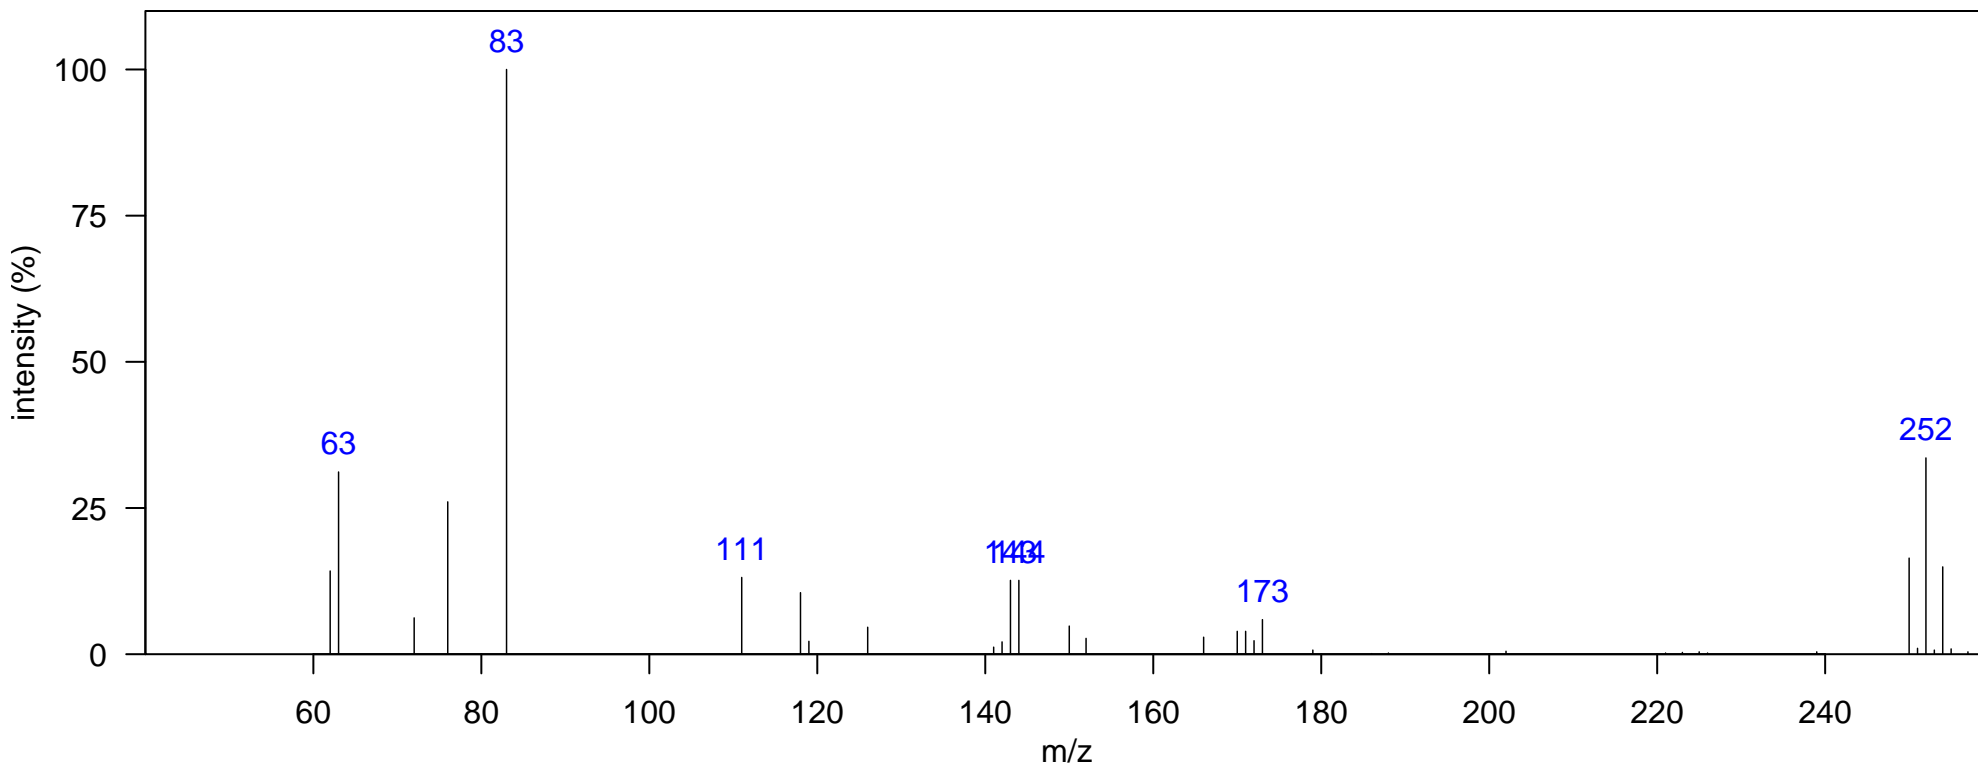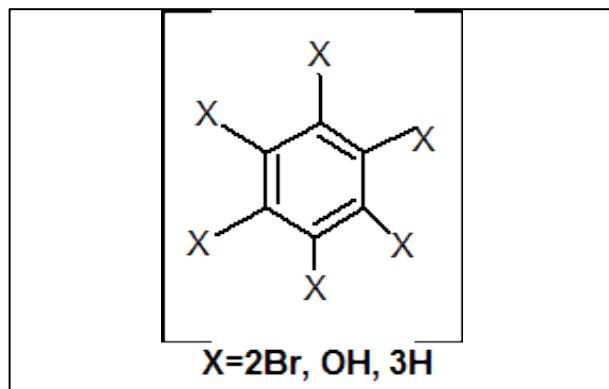

| m/z [Fragment]                        |
|---------------------------------------|
| 250 [M-Br <sub>2</sub> ] <sup>+</sup> |

Name: methoxy chlorophenol

Class: Chlorophenol-M

Matrix: South Atlantic Dolphin Blubber  
In N. Atlantic: FALSE, In N. Pacific: FALSE  
Typically Monitored: FALSE  
Comment:

Instrument: GCxGC-TOF, EI, 70 eV  
1D RT, 2D RT (s): 781.896, 0.832  
Quantitative Ion m/z: 143

Elemental Formula: C7H7ClO2  
Source: mixed  
Identification: Reference Database MS

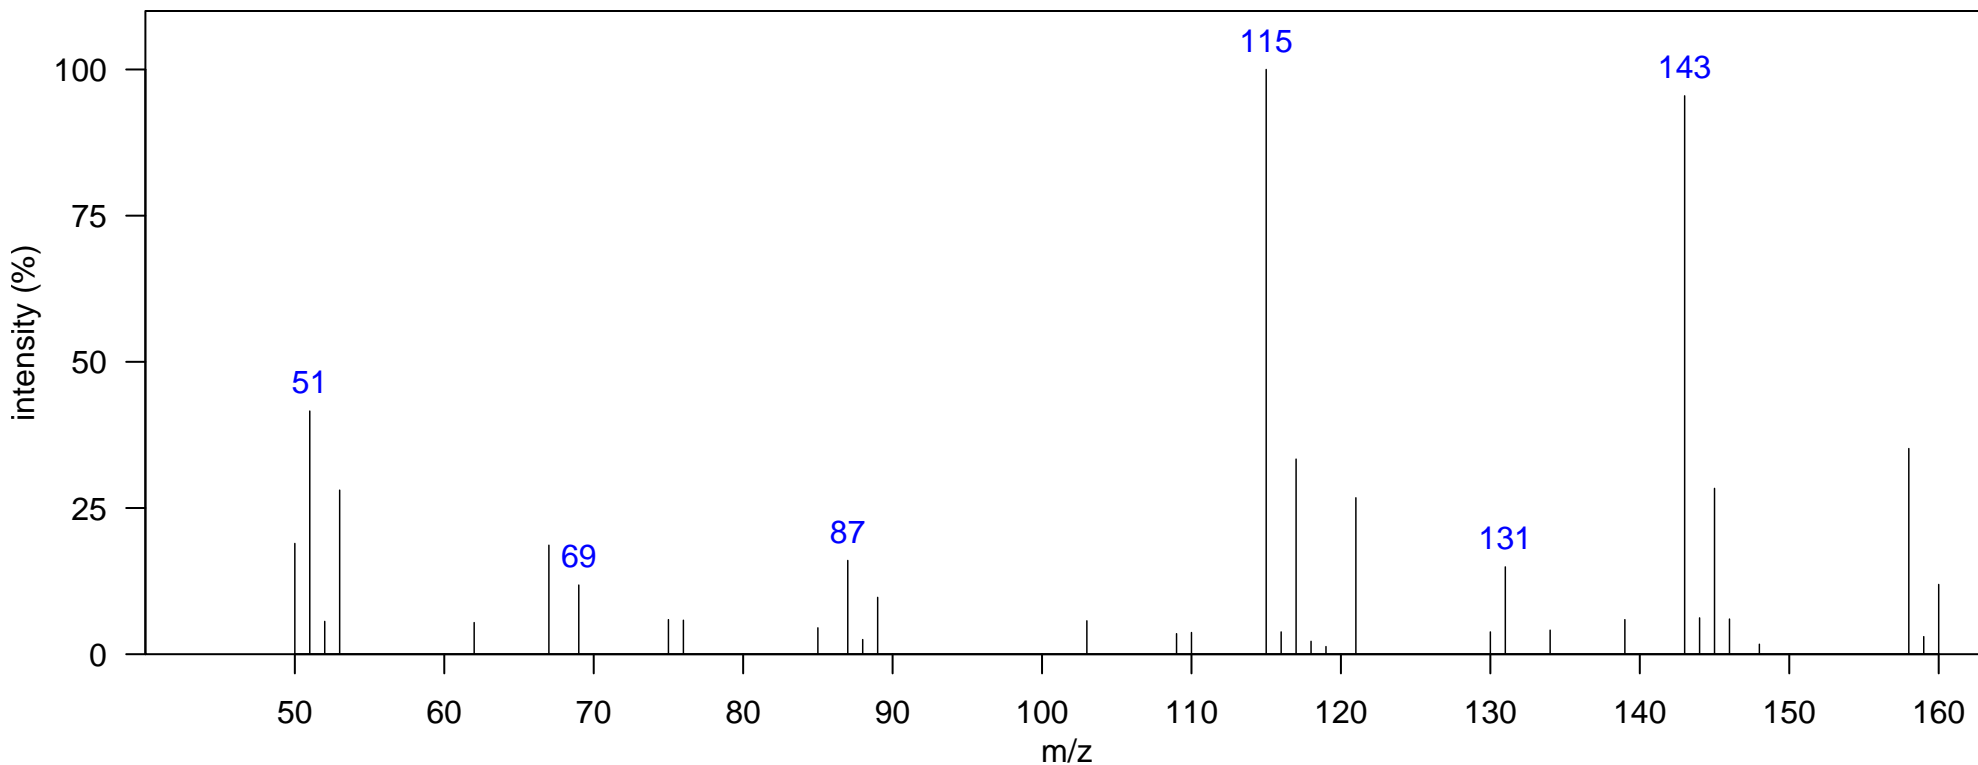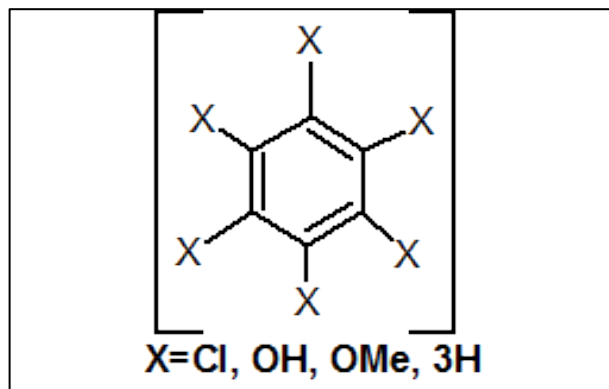

| m/z [Fragment]          |
|-------------------------|
| 143 [M-Cl] <sup>+</sup> |
| 158 M <sup>+</sup>      |

Name: dichlorophenol

Class: Chlorophenol-U

Matrix: South Atlantic Dolphin Blubber  
In N. Atlantic: FALSE, In N. Pacific: FALSE  
Typically Monitored: FALSE  
Comment:

Instrument: GCxGC-TOF, EI, 70 eV  
1D RT, 2D RT (s): 715.434, 1.082  
Quantitative Ion m/z: 162

Elemental Formula: C<sub>6</sub>H<sub>4</sub>Cl<sub>2</sub>O  
Source: unknown  
Identification: Reference Database MS

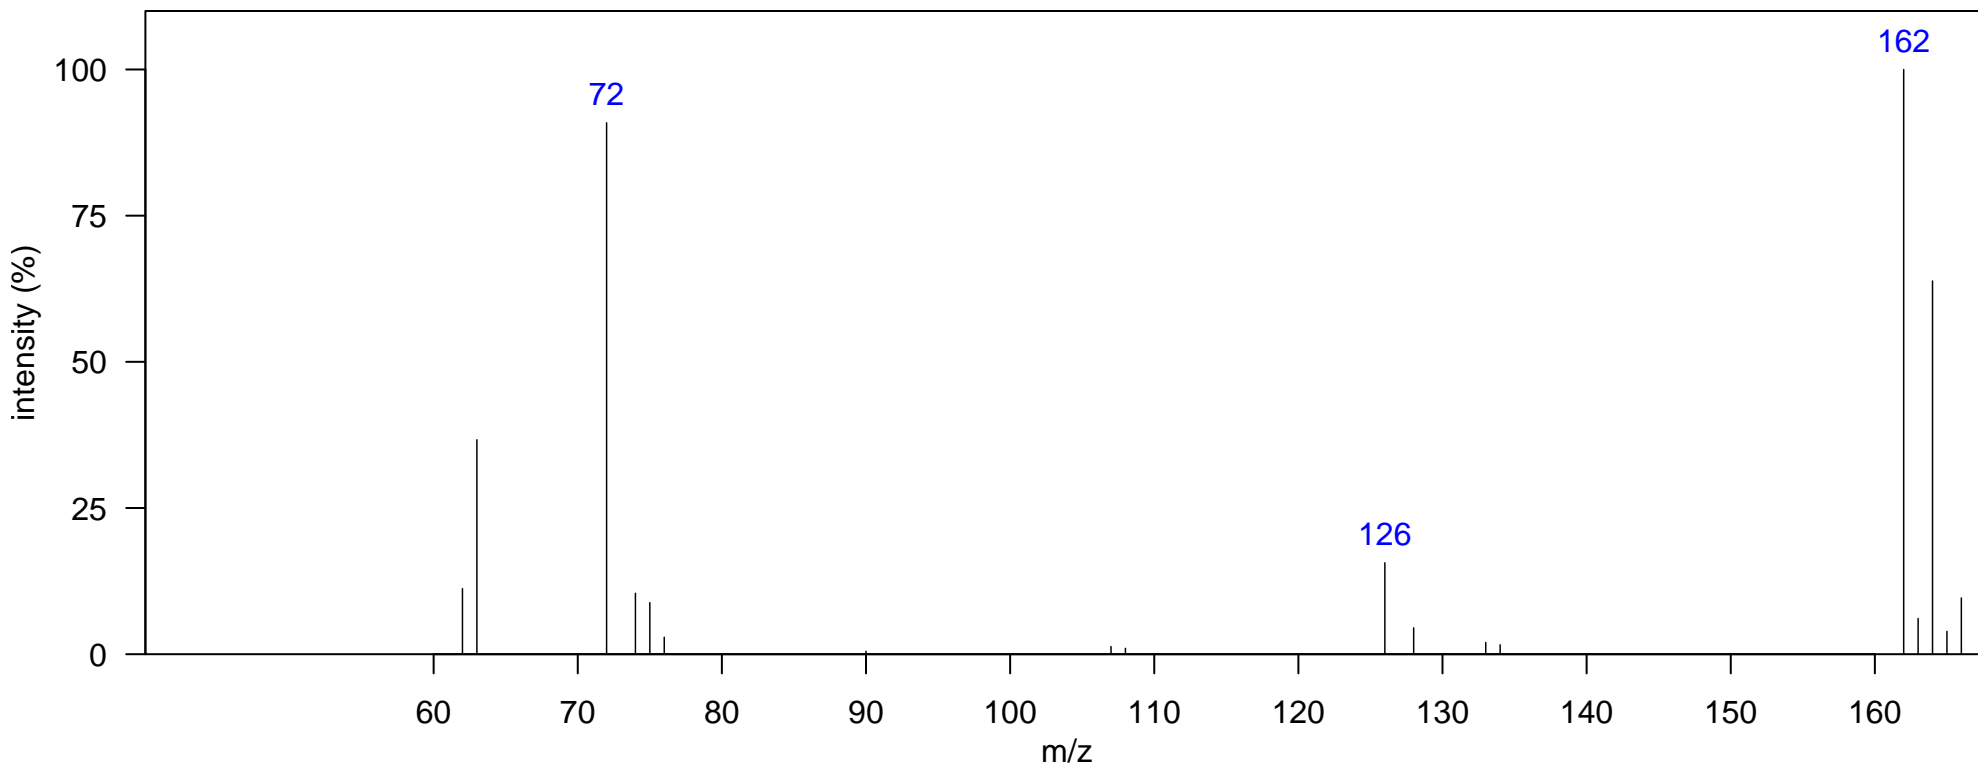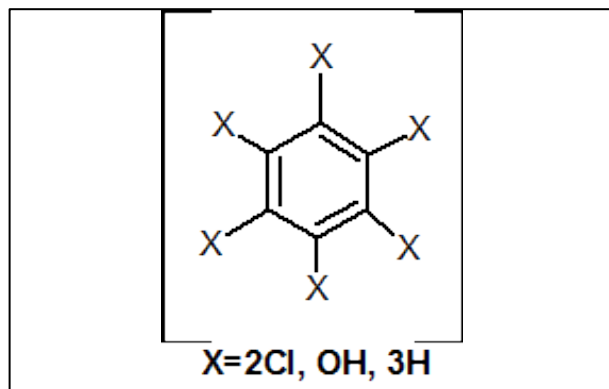

| m/z [Fragment]           |
|--------------------------|
| 126 [M-HCl] <sup>+</sup> |
| 162 M <sup>+</sup>       |

Name: PBCDE Br3Cl 1

Class: B/CDE

Matrix: South Atlantic Dolphin Blubber  
In N. Atlantic: TRUE, In N. Pacific: TRUE  
Typically Monitored: FALSE  
Comment:

Instrument: GCxGC-TOF, EI, 70 eV  
1D RT, 2D RT (s): 1355.57, 0.997  
Quantitative Ion m/z: 442

Elemental Formula: C<sub>12</sub>H<sub>6</sub>Br<sub>3</sub>ClO  
Source: unknown  
Identification: Manual-Congener Group

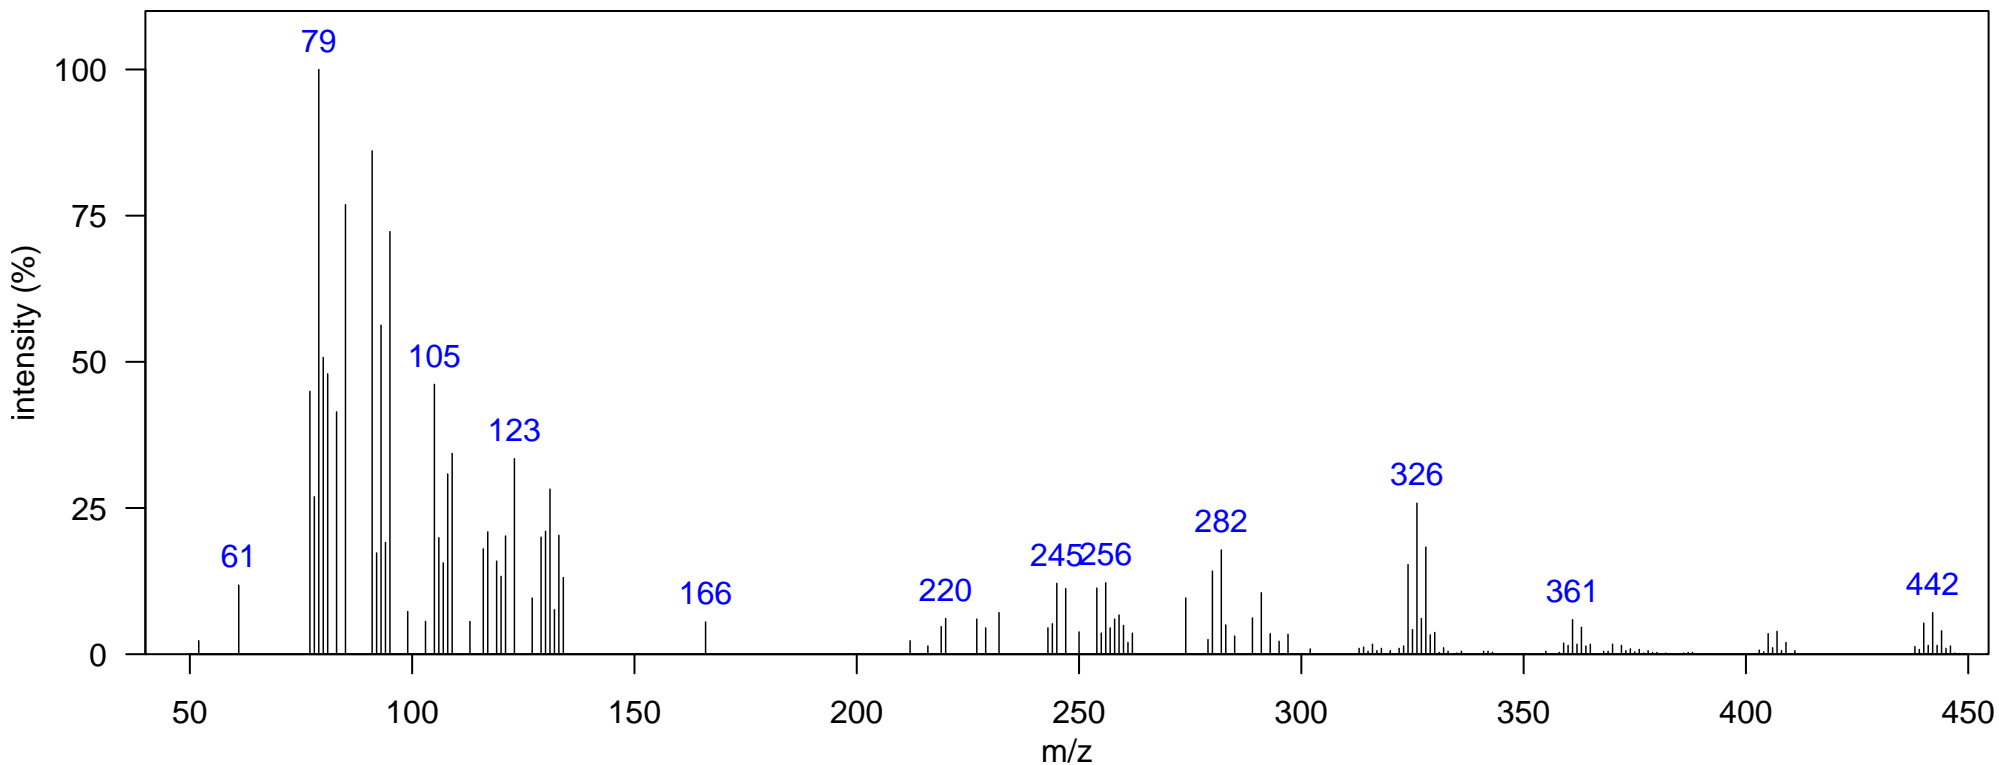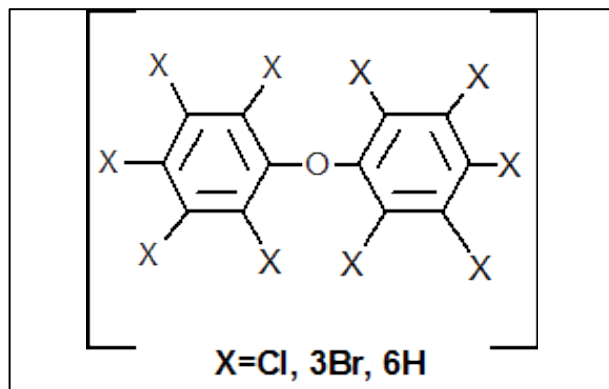

| m/z [Fragment]                        |
|---------------------------------------|
| 245 [H-Br <sub>2</sub> -Cl]           |
| 280 [M-Br <sub>2</sub> ] <sup>+</sup> |
| 359 [M-Br] <sup>+</sup>               |
| 403 [M-Cl] <sup>+</sup>               |
| 438 M <sup>+</sup>                    |

Name: unknown-1-1

Class: Unknown-1

Matrix: South Atlantic Dolphin Blubber  
In N. Atlantic: TRUE, In N. Pacific: TRUE  
Typically Monitored: FALSE  
Comment: unknown-3-1 (Pacific Library)

Instrument: GCxGC-TOF, EI, 70 eV  
1D RT, 2D RT (s): 1264.62, 1.003  
Quantitative Ion m/z: 406

Elemental Formula: C<sub>9</sub>H<sub>6</sub>OBr<sub>3</sub>Cl  
Source: unknown  
Identification: NA

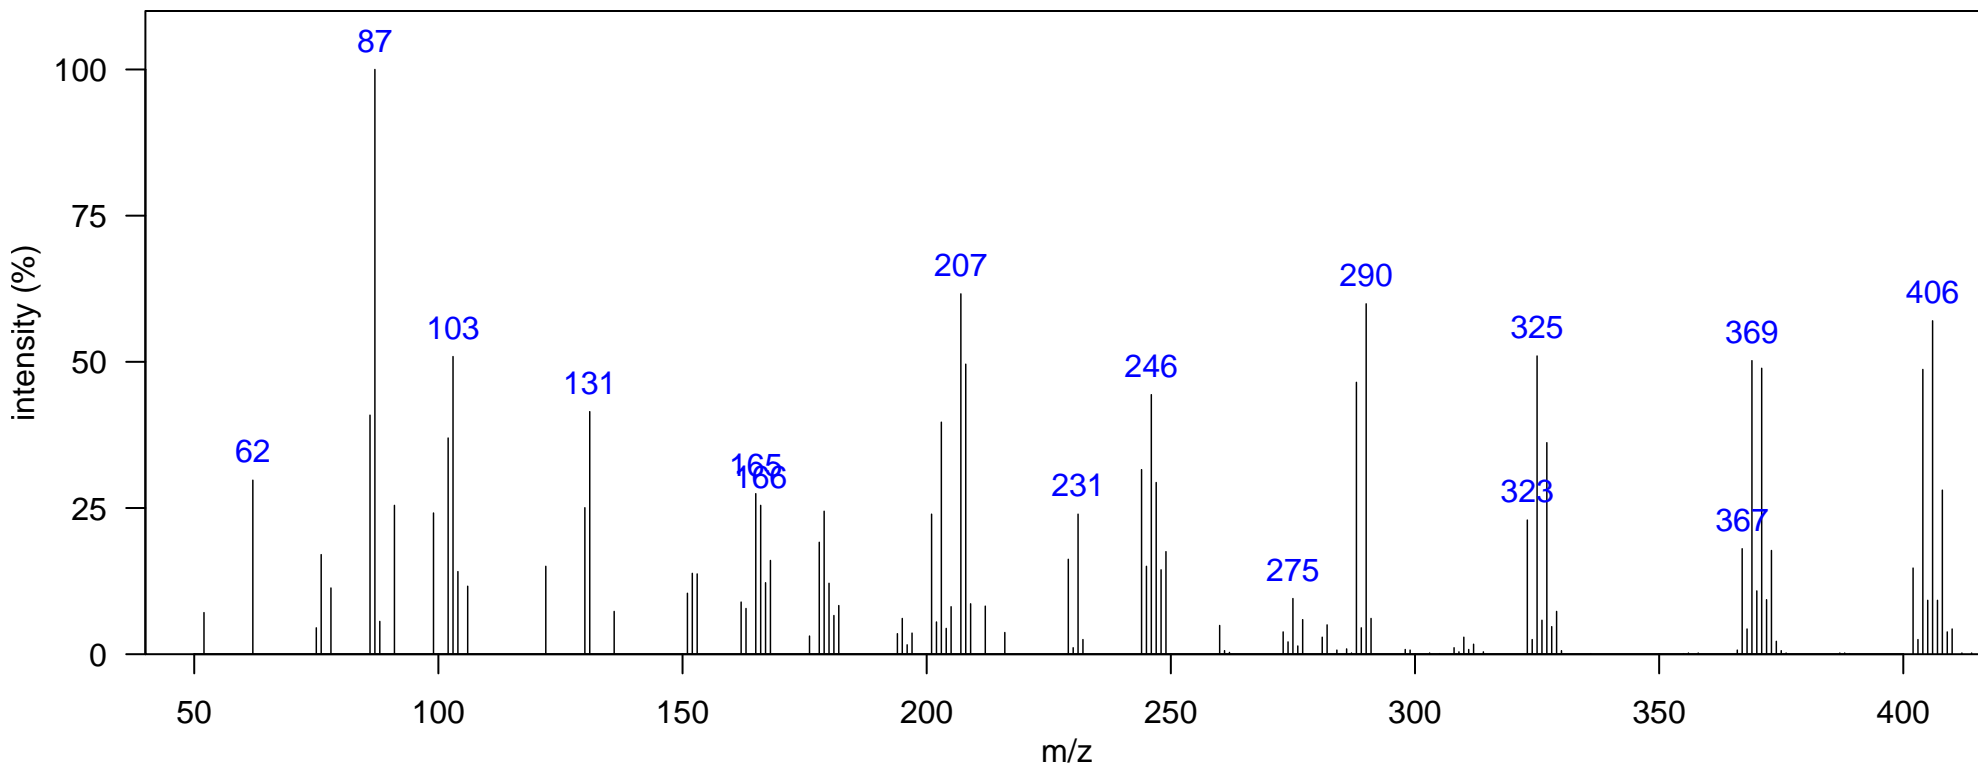

| m/z [Fragment]            |
|---------------------------|
| 288 [M-BrCl] <sup>+</sup> |
| 323 [M-Br] <sup>+</sup>   |
| 367 [M-Cl] <sup>+</sup>   |
| 402 M <sup>+</sup>        |

Name: unknown-1-2

Class: Unknown-1

Matrix: South Atlantic Dolphin Blubber  
In N. Atlantic: FALSE, In N. Pacific: FALSE  
Typically Monitored: FALSE  
Comment:

Instrument: GCxGC-TOF, EI, 70 eV  
1D RT, 2D RT (s): 1275.11, 1.01  
Quantitative Ion m/z: 406

Elemental Formula: C<sub>9</sub>H<sub>6</sub>OBr<sub>3</sub>Cl  
Source: unknown  
Identification: NA

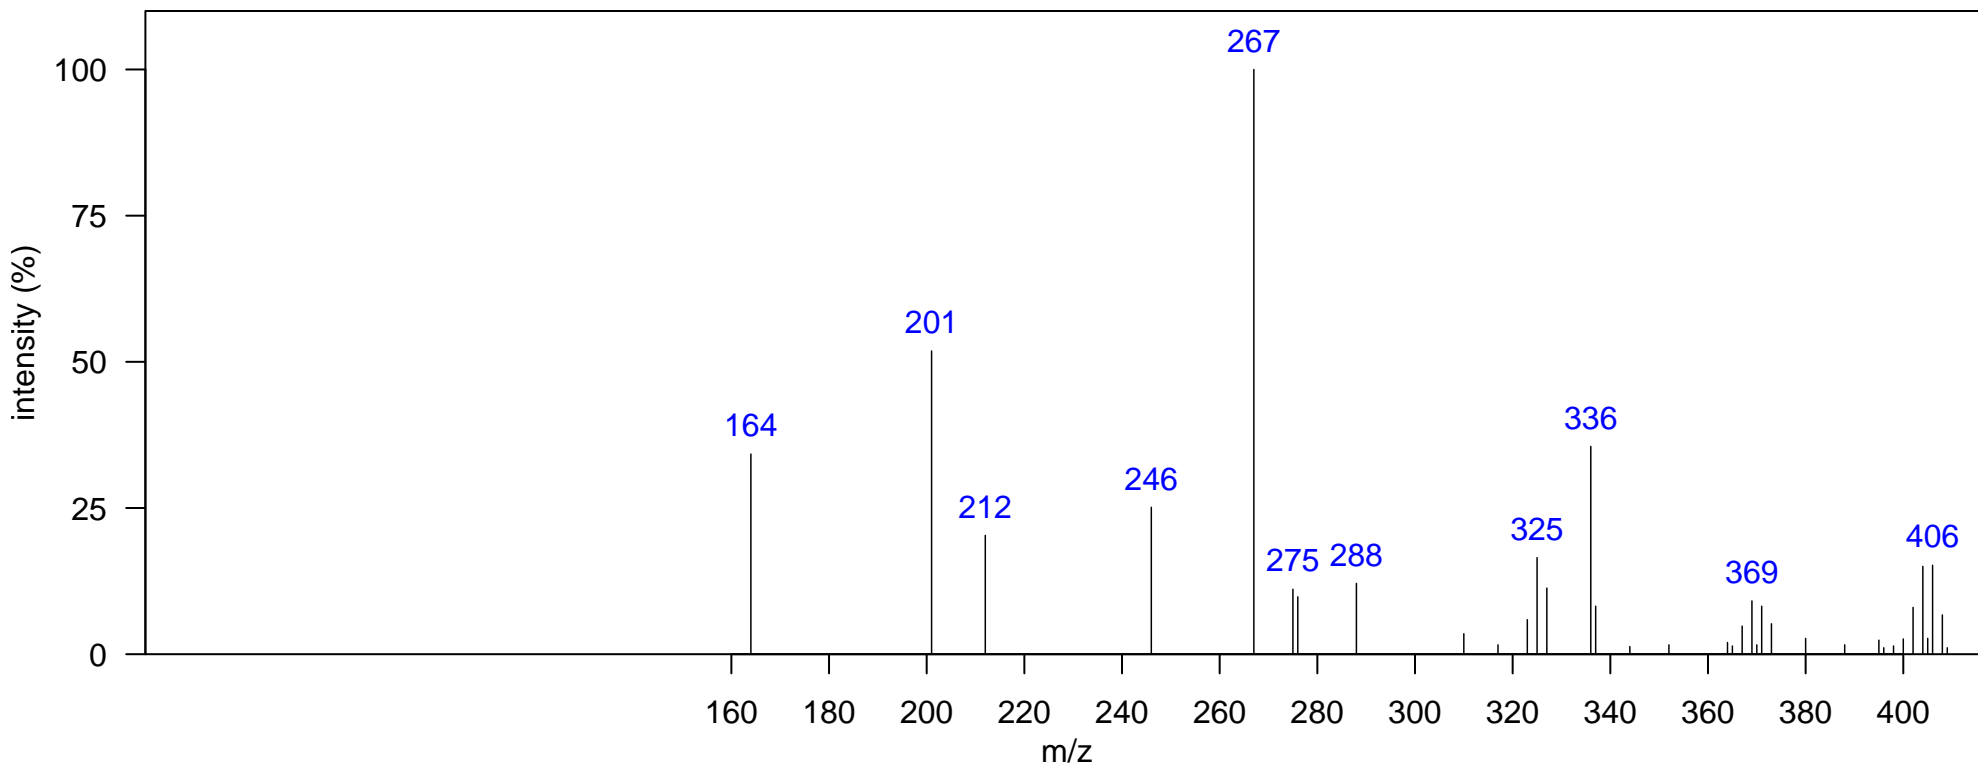

| m/z [Fragment]            |
|---------------------------|
| 288 [M-BrCl] <sup>+</sup> |
| 323 [M-Br] <sup>+</sup>   |
| 367 [M-Cl] <sup>+</sup>   |
| 402 M <sup>+</sup>        |



Name: unknown-1-3

Class: Unknown-1

Matrix: South Atlantic Dolphin Blubber  
In N. Atlantic: TRUE, In N. Pacific: TRUE  
Typically Monitored: FALSE  
Comment: unknown-3-2 (Pacific Library)

Instrument: GCxGC-TOF, EI, 70 eV  
1D RT, 2D RT (s): 1376.56, 1.096  
Quantitative Ion m/z: 484

Elemental Formula: C<sub>9</sub>H<sub>5</sub>OBr<sub>4</sub>Cl  
Source: unknown  
Identification: NA

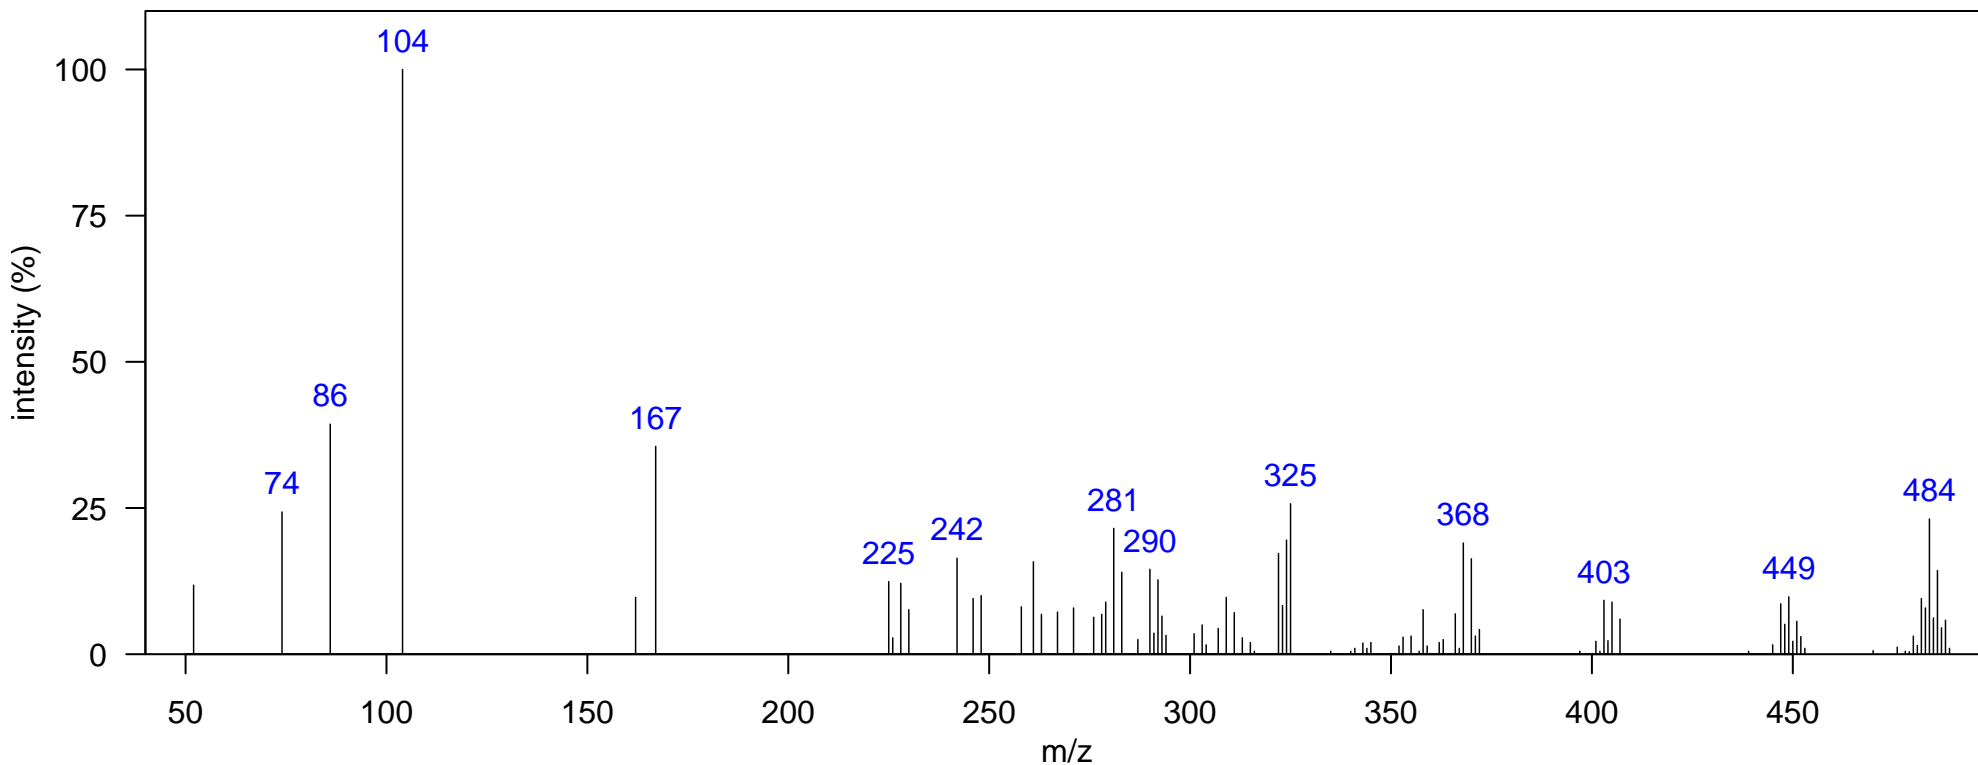

| m/z [Fragment]                        |
|---------------------------------------|
| 322 [M-Br <sub>2</sub> ] <sup>+</sup> |
| 366 [M-BrCl] <sup>+</sup>             |
| 401 [M-Br] <sup>+</sup>               |
| 445 [M-Cl] <sup>+</sup>               |
| 480 M <sup>+</sup>                    |

Name: unknown-1-4

Class: Unknown-1

Matrix: South Atlantic Dolphin Blubber  
In N. Atlantic: FALSE, In N. Pacific: FALSE  
Typically Monitored: FALSE  
Comment:

Instrument: GCxGC-TOF, EI, 70 eV  
1D RT, 2D RT (s): 1401.04, 1.036  
Quantitative Ion m/z: 484

Elemental Formula: C<sub>9</sub>H<sub>6</sub>OBr<sub>4</sub>Cl  
Source: unknown  
Identification: NA

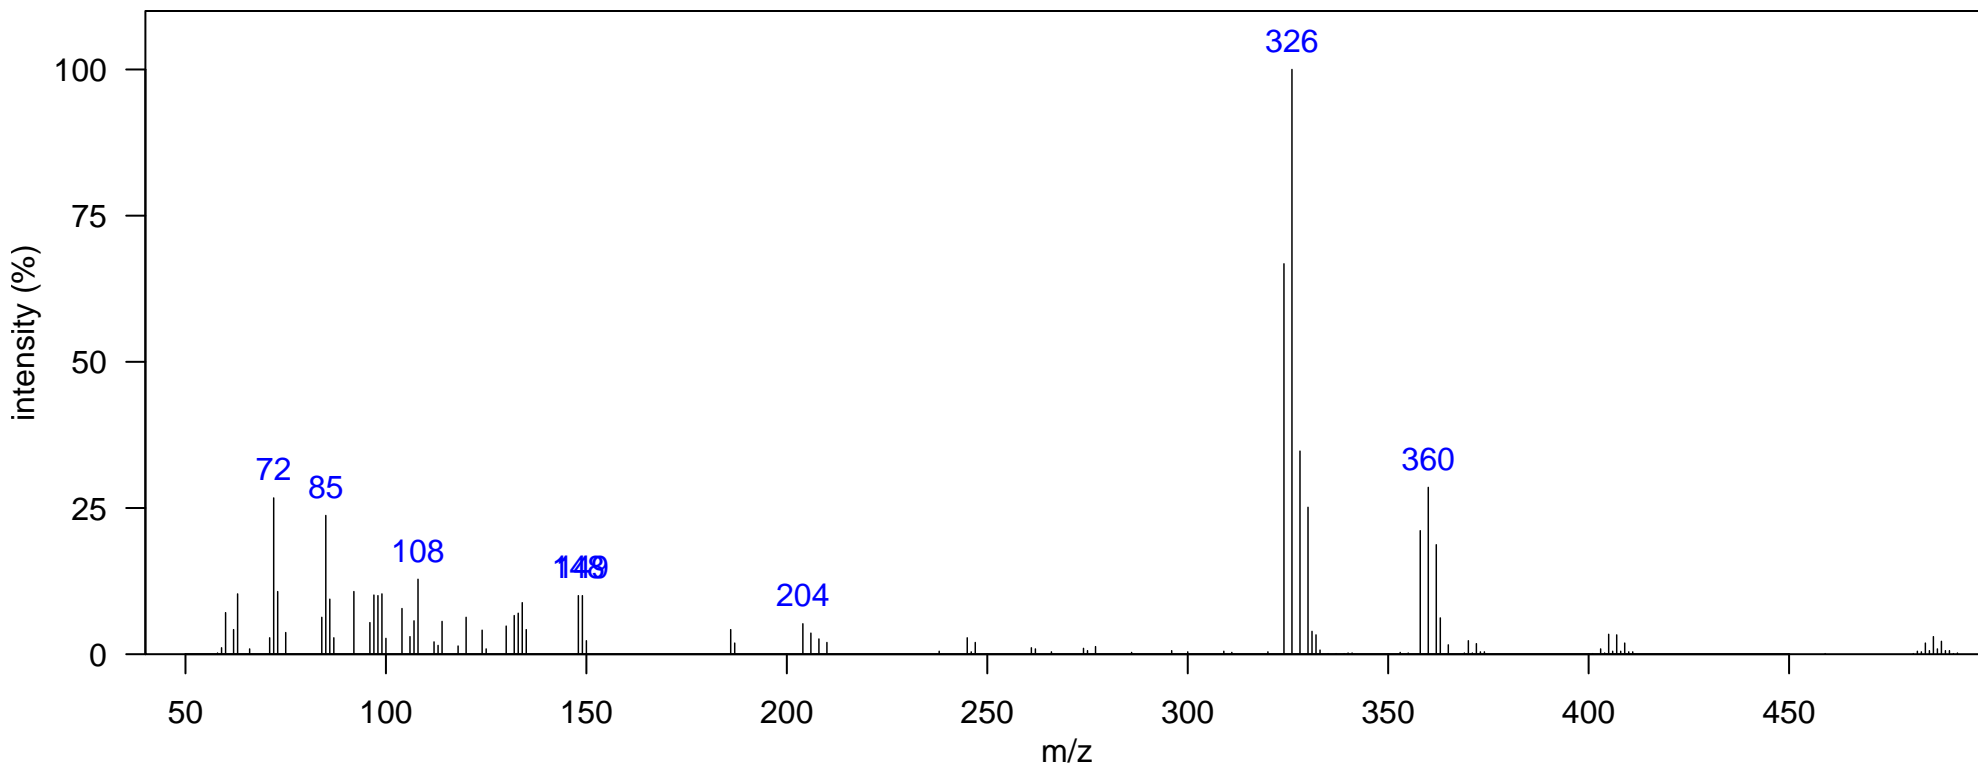

| m/z [Fragment]          |
|-------------------------|
| 360 PCB Interference    |
| 401 [M-Br] <sup>+</sup> |
| 480 M <sup>+</sup>      |

Name: unknown-1-5

Class: Unknown-1

Matrix: South Atlantic Dolphin Blubber  
In N. Atlantic: TRUE, In N. Pacific: TRUE  
Typically Monitored: FALSE  
Comment: unknown-3-3 (Pacific Library)

Instrument: GCxGC-TOF, EI, 70 eV  
1D RT, 2D RT (s): 1429.03, 1.135  
Quantitative Ion m/z: 484

Elemental Formula: C<sub>9</sub>H<sub>5</sub>OBr<sub>4</sub>Cl  
Source: unknown  
Identification: NA

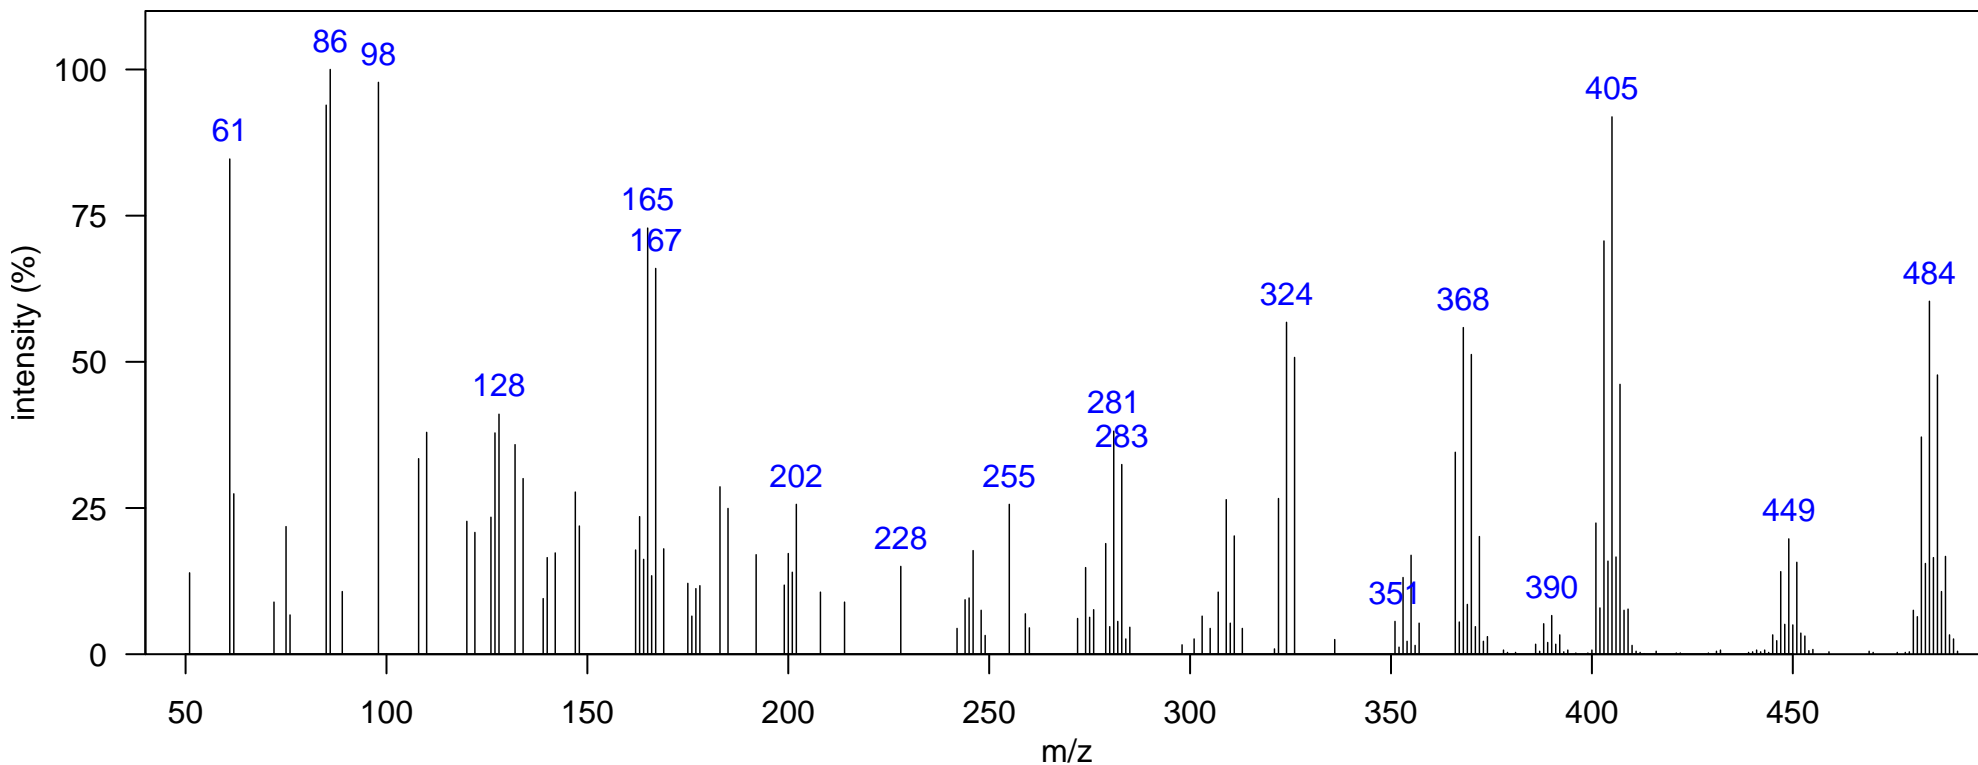

| m/z [Fragment]          |
|-------------------------|
| 401 [M-Br] <sup>+</sup> |
| 445 [M-Cl] <sup>+</sup> |
| 480 M <sup>+</sup>      |

Name: unknown-2-1

Class: Unknown-2

Matrix: South Atlantic Dolphin Blubber  
In N. Atlantic: TRUE, In N. Pacific: TRUE  
Typically Monitored: FALSE  
Comment: unknown-4-3 (Pacific Library). Hypothesized PCDE or OH-PCB

Instrument: GCxGC-TOF, EI, 70 eV  
1D RT, 2D RT (s): 1436.02, 1.003  
Quantitative Ion m/z: 376

Elemental Formula: C<sub>12</sub>H<sub>4</sub>Cl<sub>6</sub>O  
Source: unknown  
Identification: NA

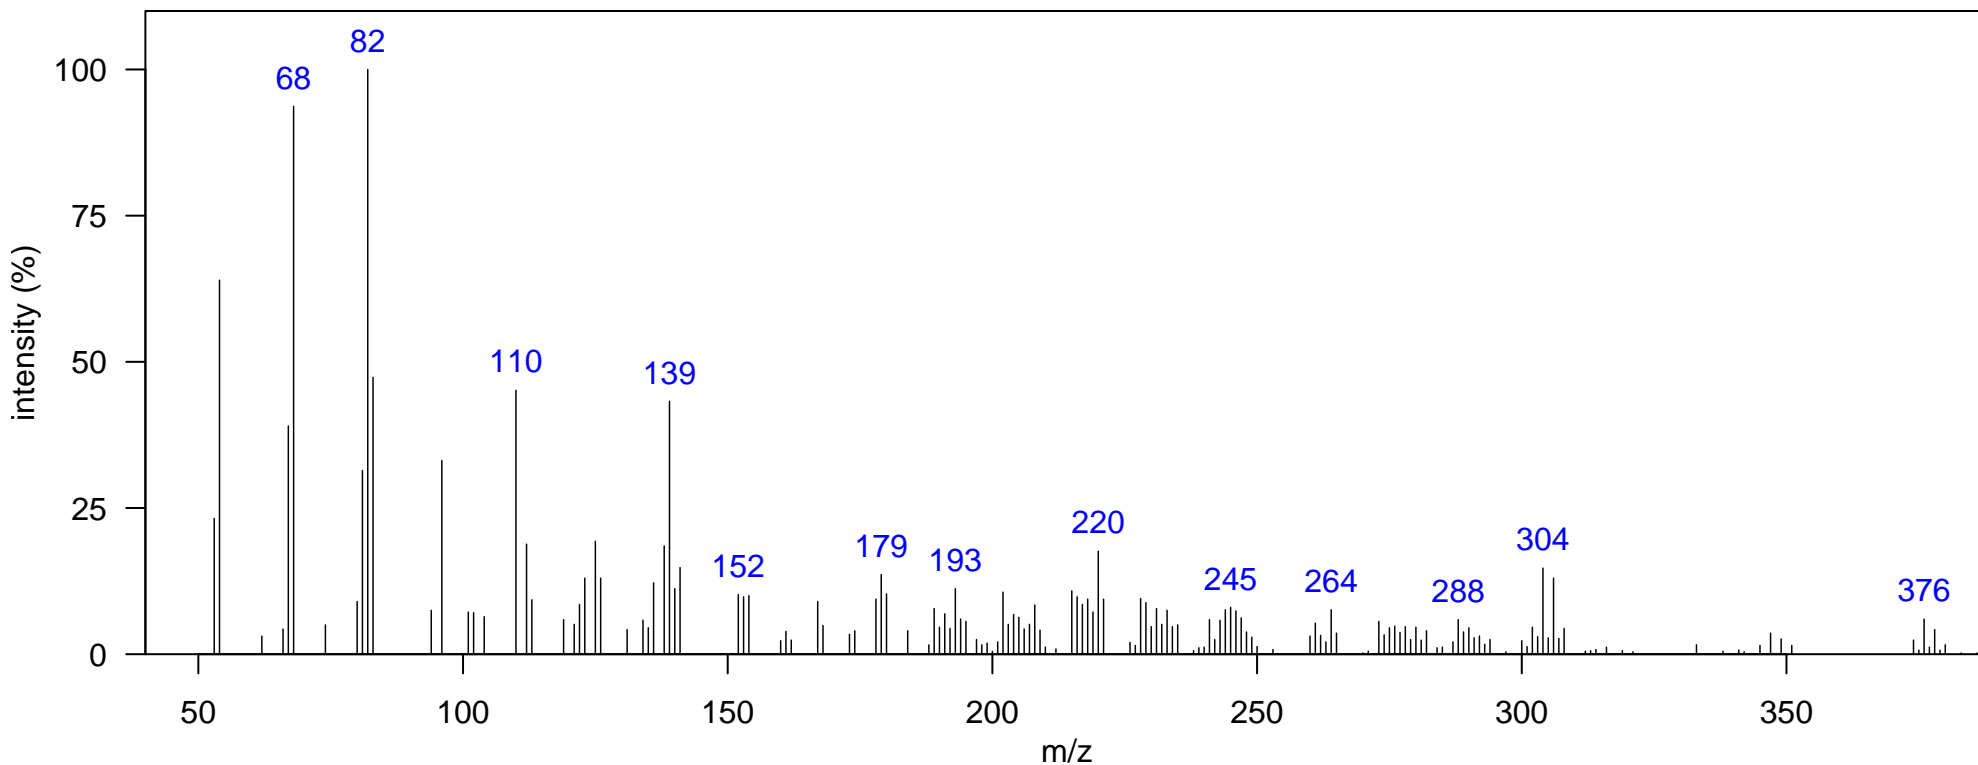

| m/z [Fragment]                        |
|---------------------------------------|
| 304 [M-Cl <sub>2</sub> ] <sup>+</sup> |
| 374 M <sup>+</sup>                    |

Name: unknown-2-2

Class: Unknown-2

Matrix: South Atlantic Dolphin Blubber  
In N. Atlantic: TRUE, In N. Pacific: TRUE  
Typically Monitored: FALSE  
Comment: unknown-4-9 (Pacific Library). Hypothesized PCDE or OH-PCB

Instrument: GCxGC-TOF, EI, 70 eV  
1D RT, 2D RT (s): 1457.01, 1.076  
Quantitative Ion m/z: 410

Elemental Formula: C<sub>12</sub>H<sub>3</sub>Cl<sub>7</sub>O  
Source: unknown  
Identification: NA

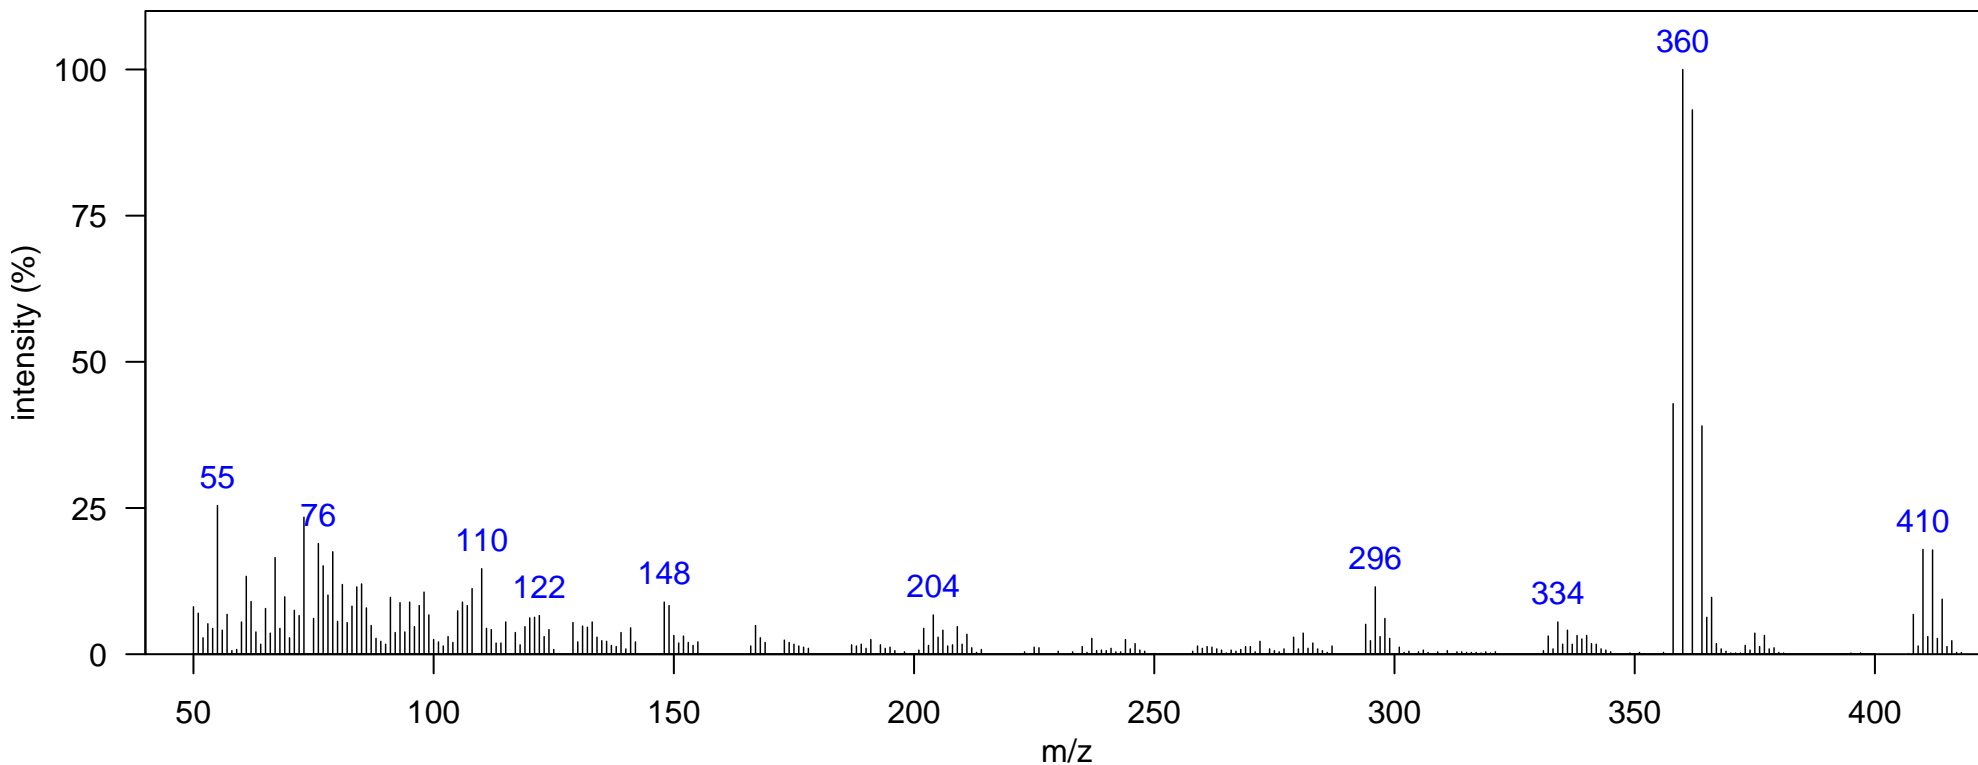

| m/z [Fragment]          |
|-------------------------|
| 360 PCB Interference    |
| 373 [M-Cl] <sup>+</sup> |
| 408 M <sup>+</sup>      |

Name: unknown-2-3

Class: Unknown-2

Matrix: South Atlantic Dolphin Blubber  
In N. Atlantic: TRUE, In N. Pacific: TRUE  
Typically Monitored: FALSE  
Comment: unknown-4-10 (Pacific Library). Hypothesized PCDE or OH-PCB

Instrument: GCxGC-TOF, EI, 70 eV  
1D RT, 2D RT (s): 1509.48, 1.049  
Quantitative Ion m/z: 410

Elemental Formula: C<sub>12</sub>H<sub>3</sub>Cl<sub>7</sub>O  
Source: unknown  
Identification: NA

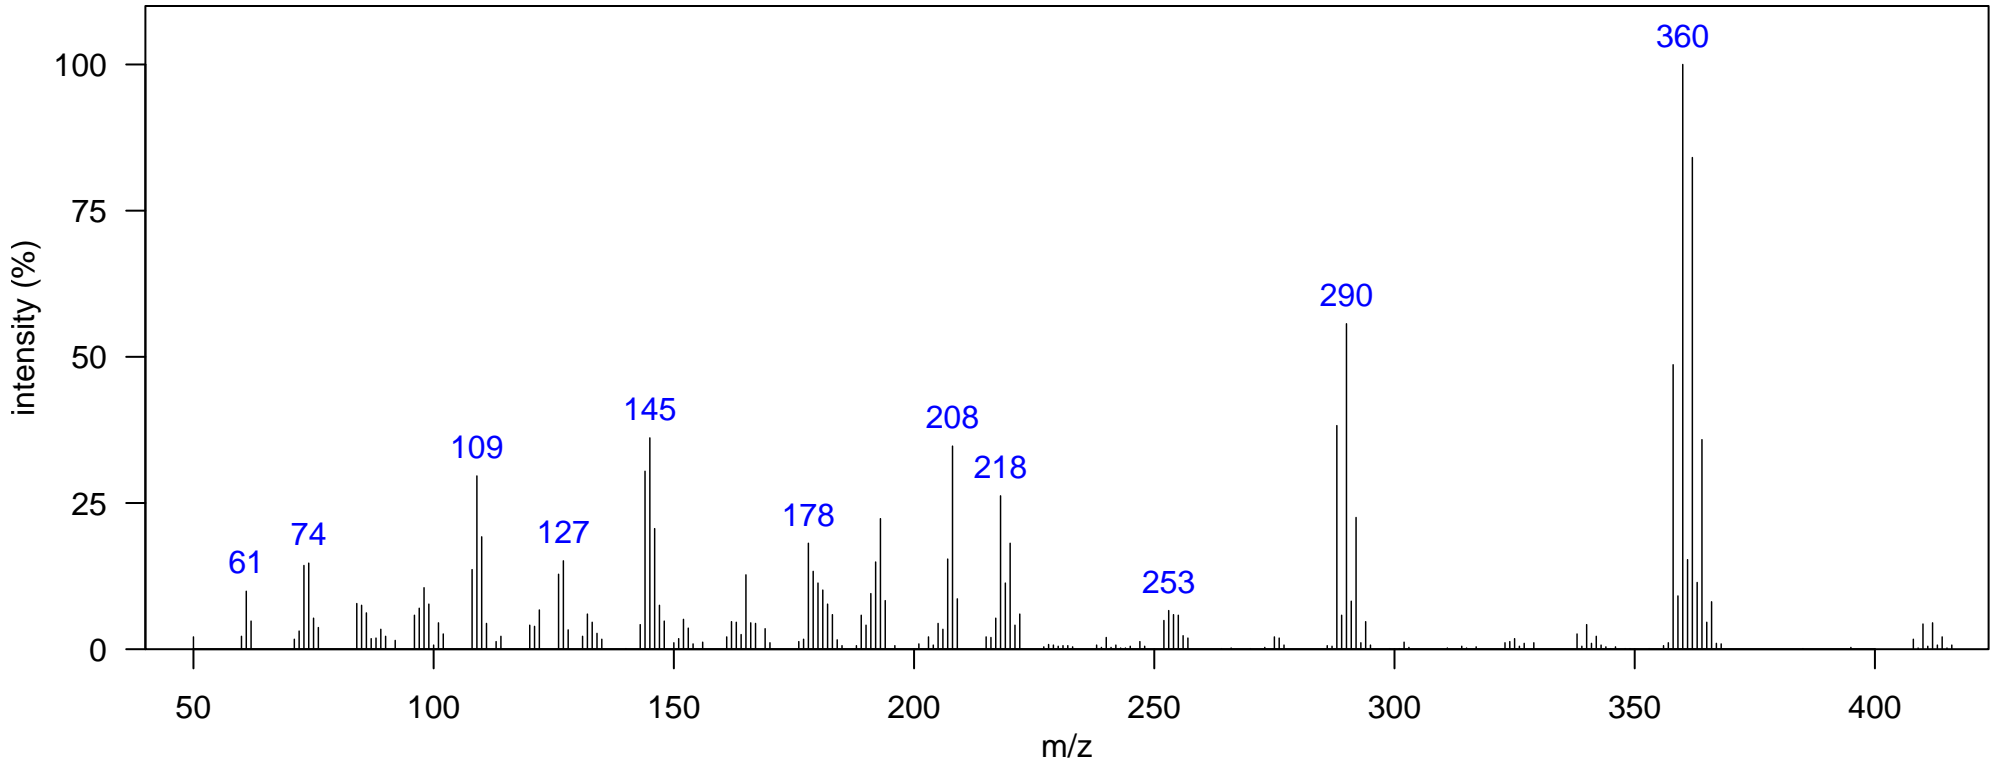

| m/z [Fragment]                        |
|---------------------------------------|
| 290 PCB Interference                  |
| 360 PCB Interference                  |
| 338 [M-Cl <sub>2</sub> ] <sup>+</sup> |
| 408 M <sup>+</sup>                    |

Name: unknown-2-4

Class: Unknown-2

Matrix: South Atlantic Dolphin Blubber  
In N. Atlantic: FALSE, In N. Pacific: FALSE  
Typically Monitored: FALSE  
Comment:

Instrument: GCxGC-TOF, EI, 70 eV  
1D RT, 2D RT (s): 1519.97, 1.036  
Quantitative Ion m/z: 410

Elemental Formula: C<sub>12</sub>H<sub>3</sub>Cl<sub>7</sub>O  
Source: unknown  
Identification: NA

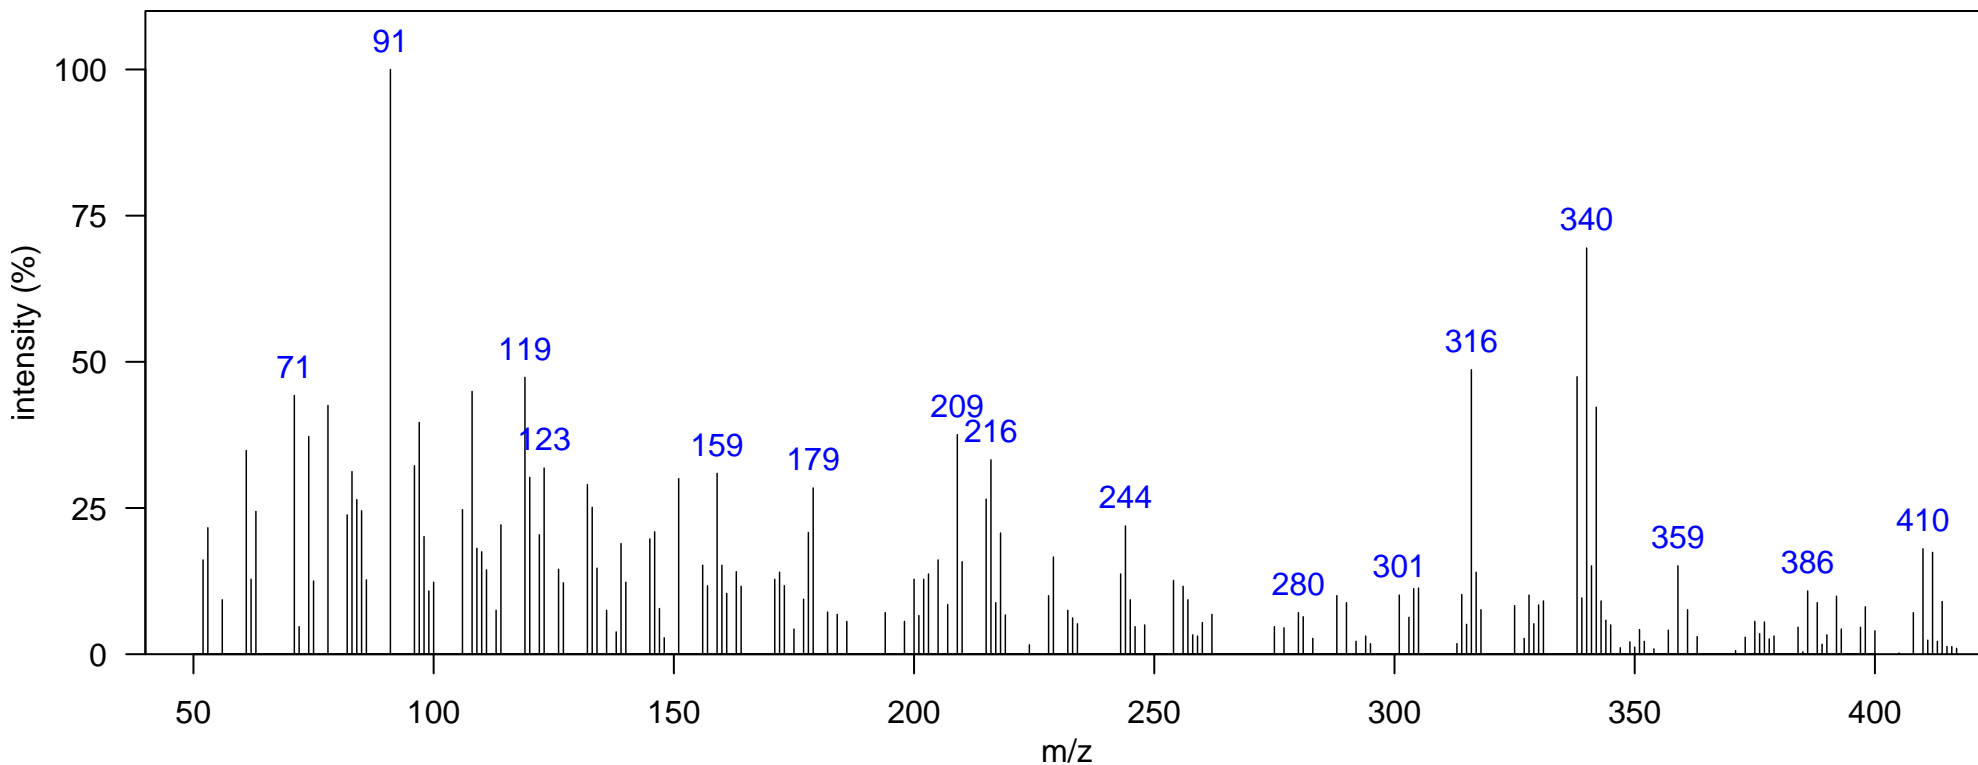

| m/z [Fragment]                        |
|---------------------------------------|
| 338 [M-Cl <sub>2</sub> ] <sup>+</sup> |
| 408 M <sup>+</sup>                    |

Name: unknown-2-5

Class: Unknown-2

Matrix: South Atlantic Dolphin Blubber  
In N. Atlantic: TRUE, In N. Pacific: TRUE  
Typically Monitored: FALSE  
Comment: unknown-4-11 (Pacific Library). Hypothesized PCDE or OH-PCB

Instrument: GCxGC-TOF, EI, 70 eV  
1D RT, 2D RT (s): 1530.47, 1.076  
Quantitative Ion m/z: 410

Elemental Formula: C<sub>12</sub>H<sub>3</sub>Cl<sub>7</sub>O  
Source: unknown  
Identification: NA

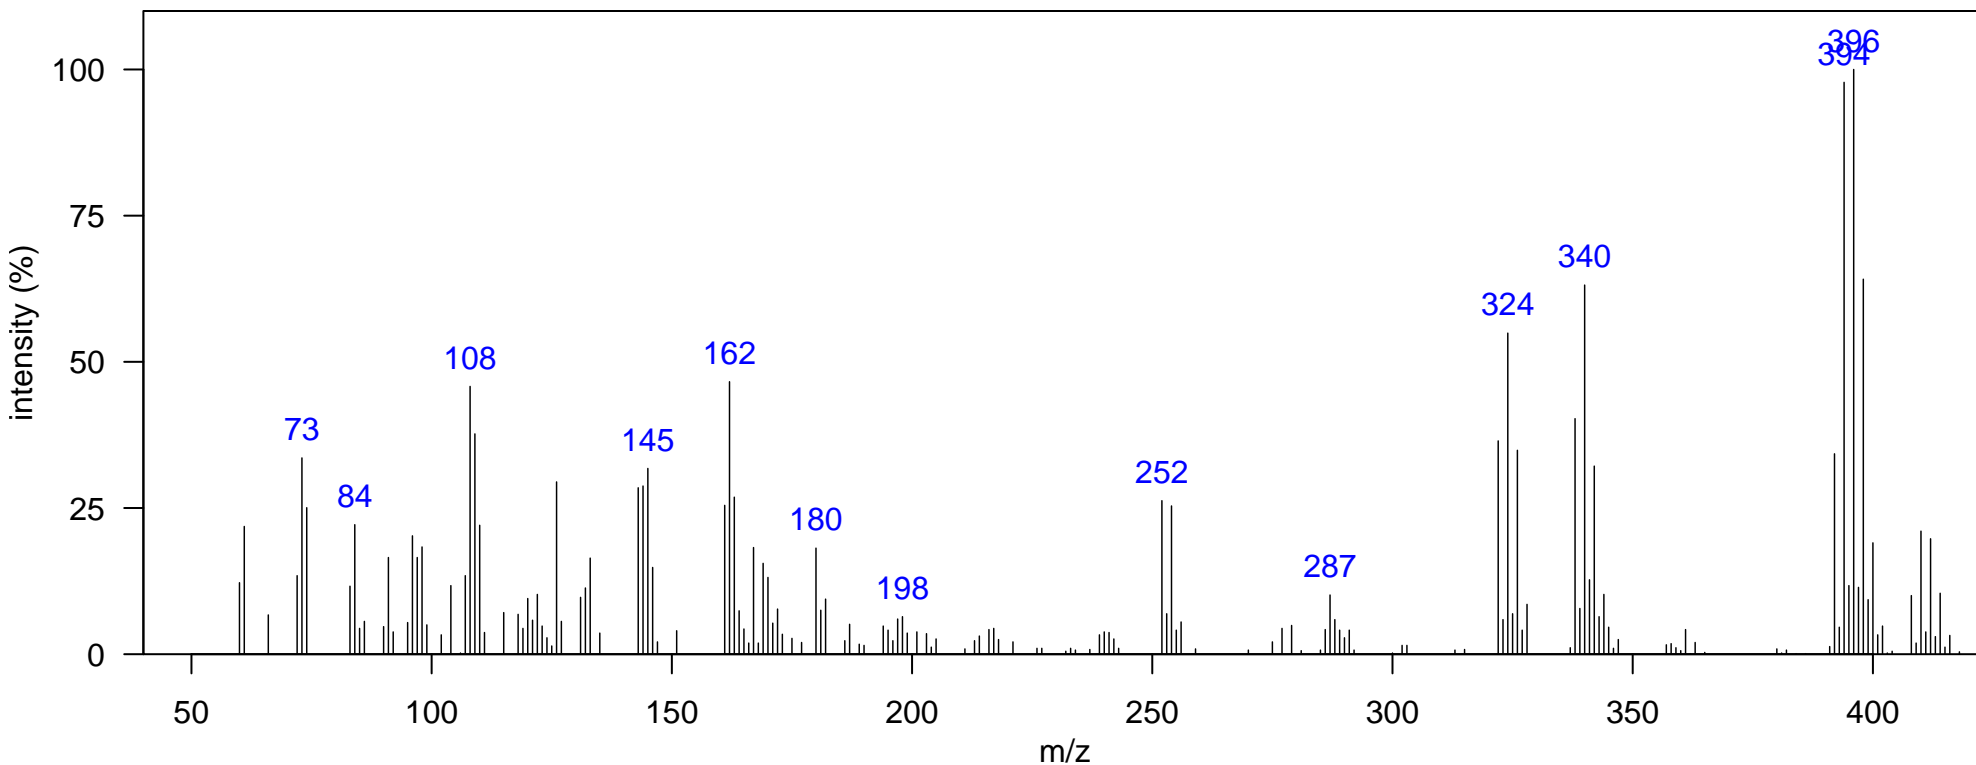

| m/z [Fragment]                        |
|---------------------------------------|
| 324 PCB Interference                  |
| 396 PCB Interference                  |
| 338 [M-Cl <sub>2</sub> ] <sup>+</sup> |
| 408 M <sup>+</sup>                    |



Name: unknown-2-6

Class: Unknown-2

Matrix: South Atlantic Dolphin Blubber  
In N. Atlantic: FALSE, In N. Pacific: FALSE  
Typically Monitored: FALSE  
Comment:

Instrument: GCxGC-TOF, EI, 70 eV  
1D RT, 2D RT (s): 1533.97, 1.089  
Quantitative Ion m/z: 410

Elemental Formula: C<sub>12</sub>H<sub>3</sub>Cl<sub>7</sub>O  
Source: unknown  
Identification: NA

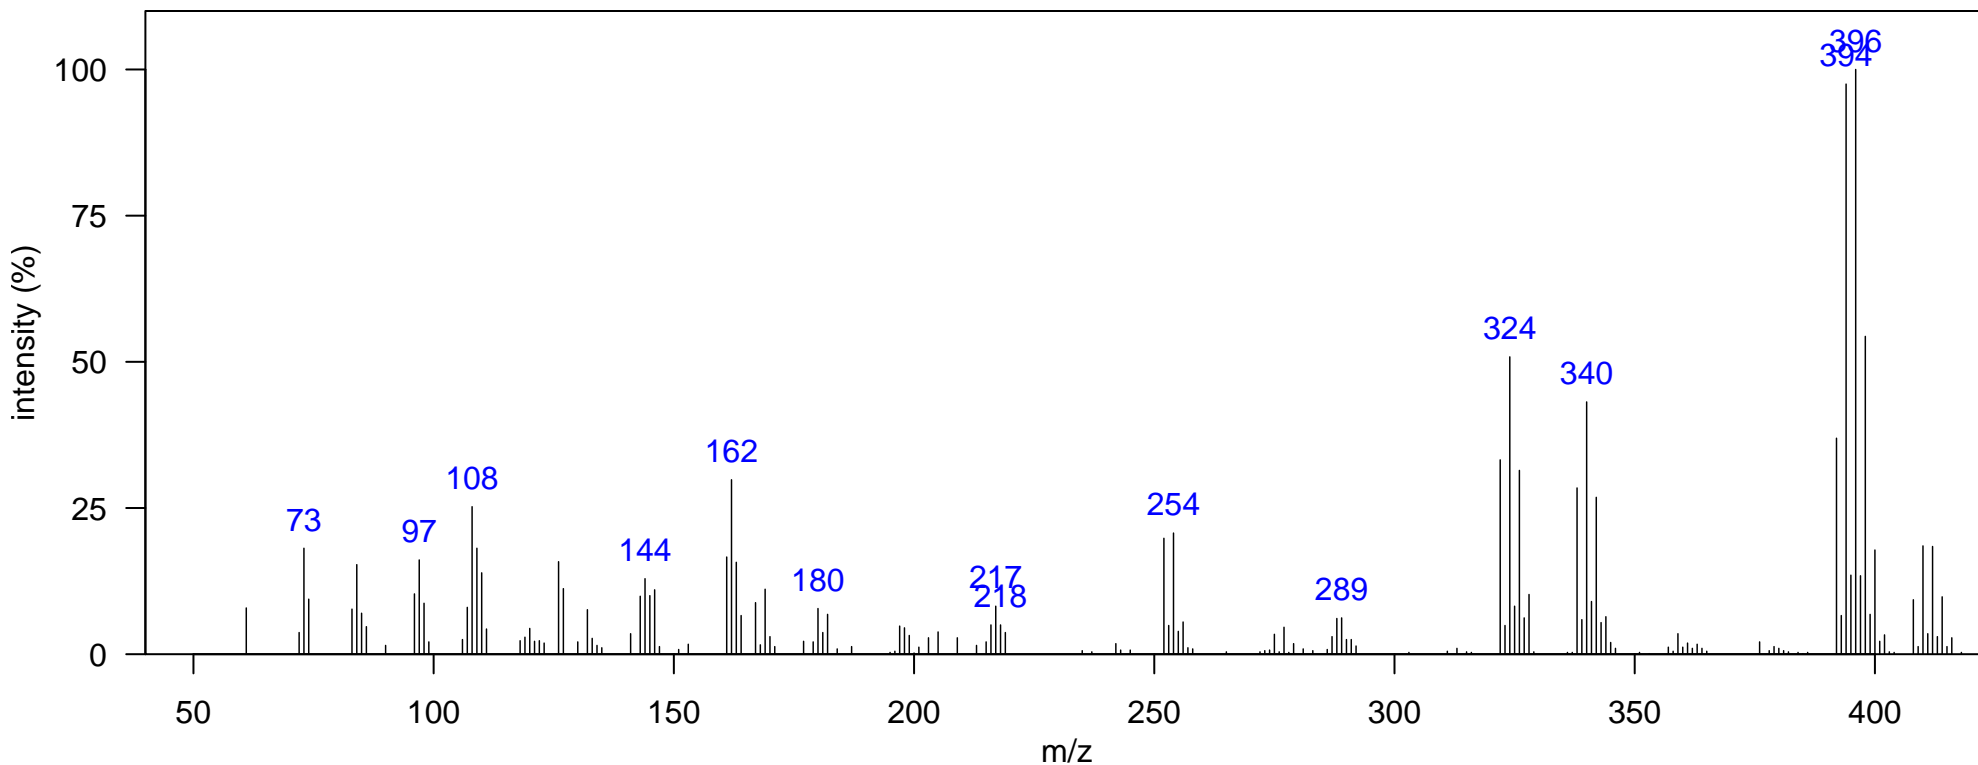

| m/z [Fragment]                        |
|---------------------------------------|
| 324 PCB Interference                  |
| 396 PCB Interference                  |
| 338 [M-Cl <sub>2</sub> ] <sup>+</sup> |
| 408 M <sup>+</sup>                    |

Name: unknown-2-7

Class: Unknown-2

Matrix: South Atlantic Dolphin Blubber  
In N. Atlantic: TRUE, In N. Pacific: TRUE  
Typically Monitored: FALSE  
Comment: unknown-4-13 (Pacific Library). Hypothesized PCDE or OH-PCB

Instrument: GCxGC-TOF, EI, 70 eV  
1D RT, 2D RT (s): 1586.44, 1.254  
Quantitative Ion m/z: 410

Elemental Formula: C<sub>12</sub>H<sub>3</sub>Cl<sub>7</sub>O  
Source: unknown  
Identification: NA

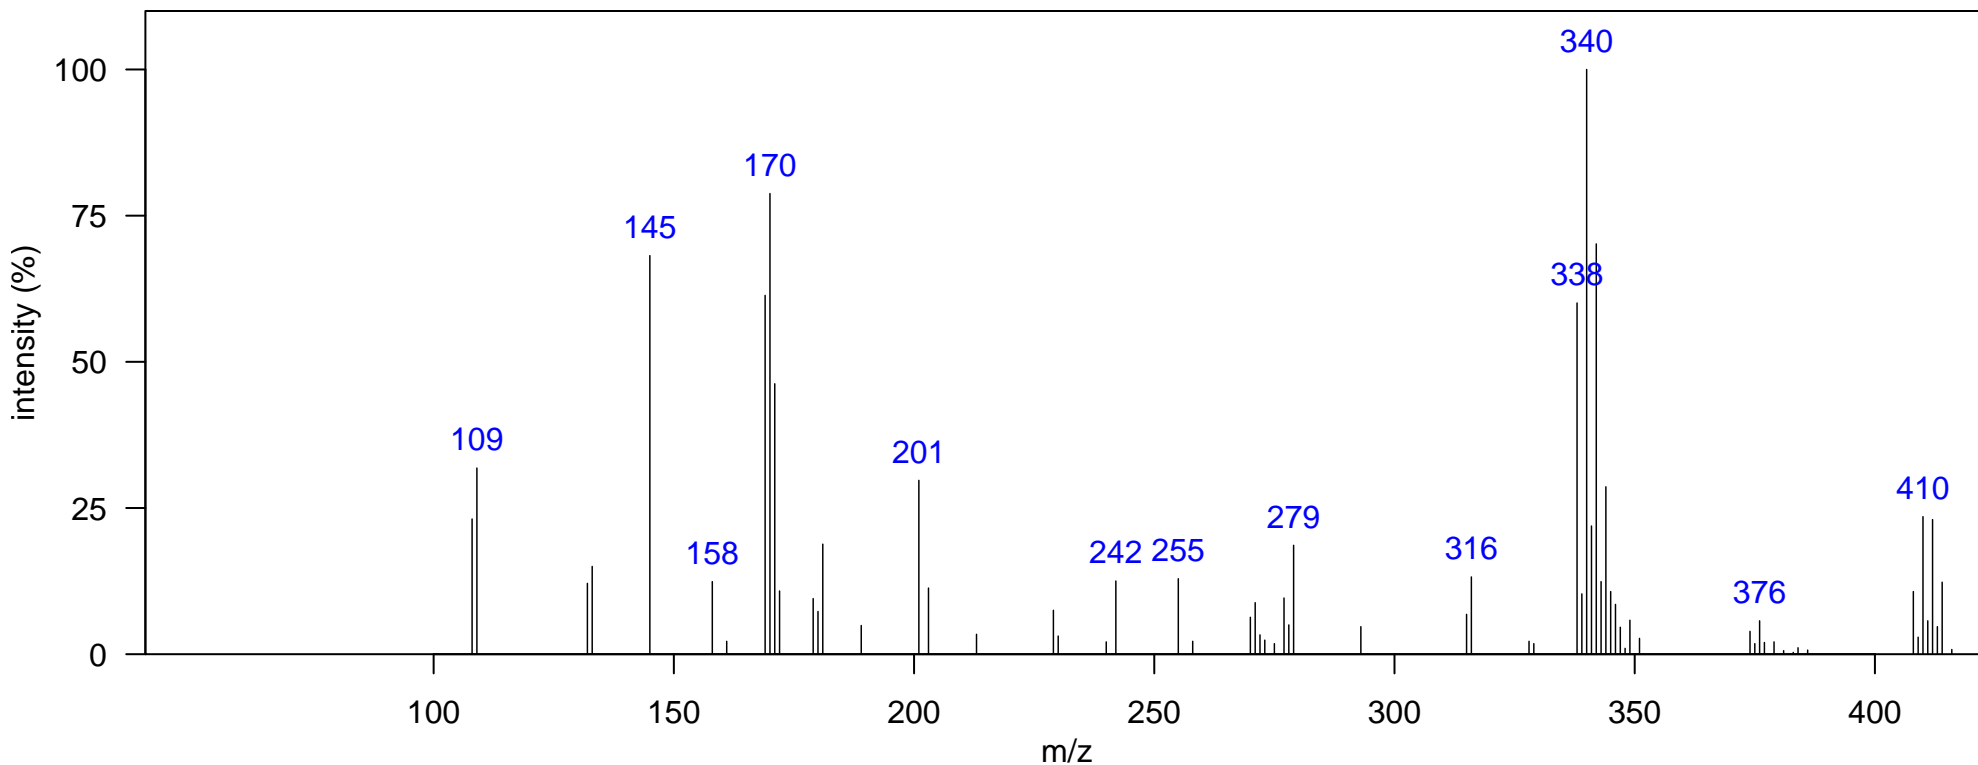

| m/z [Fragment]                        |
|---------------------------------------|
| 338 [M-Cl <sub>2</sub> ] <sup>+</sup> |
| 408 M <sup>+</sup>                    |

Name: unknown-2-8

Class: Unknown-2

Matrix: South Atlantic Dolphin Blubber  
In N. Atlantic: FALSE, In N. Pacific: FALSE  
Typically Monitored: FALSE  
Comment:

Instrument: GCxGC-TOF, EI, 70 eV  
1D RT, 2D RT (s): 1607.42, 1.267  
Quantitative Ion m/z: 446

Elemental Formula: C<sub>12</sub>H<sub>2</sub>Cl<sub>8</sub>O  
Source: unknown  
Identification: NA

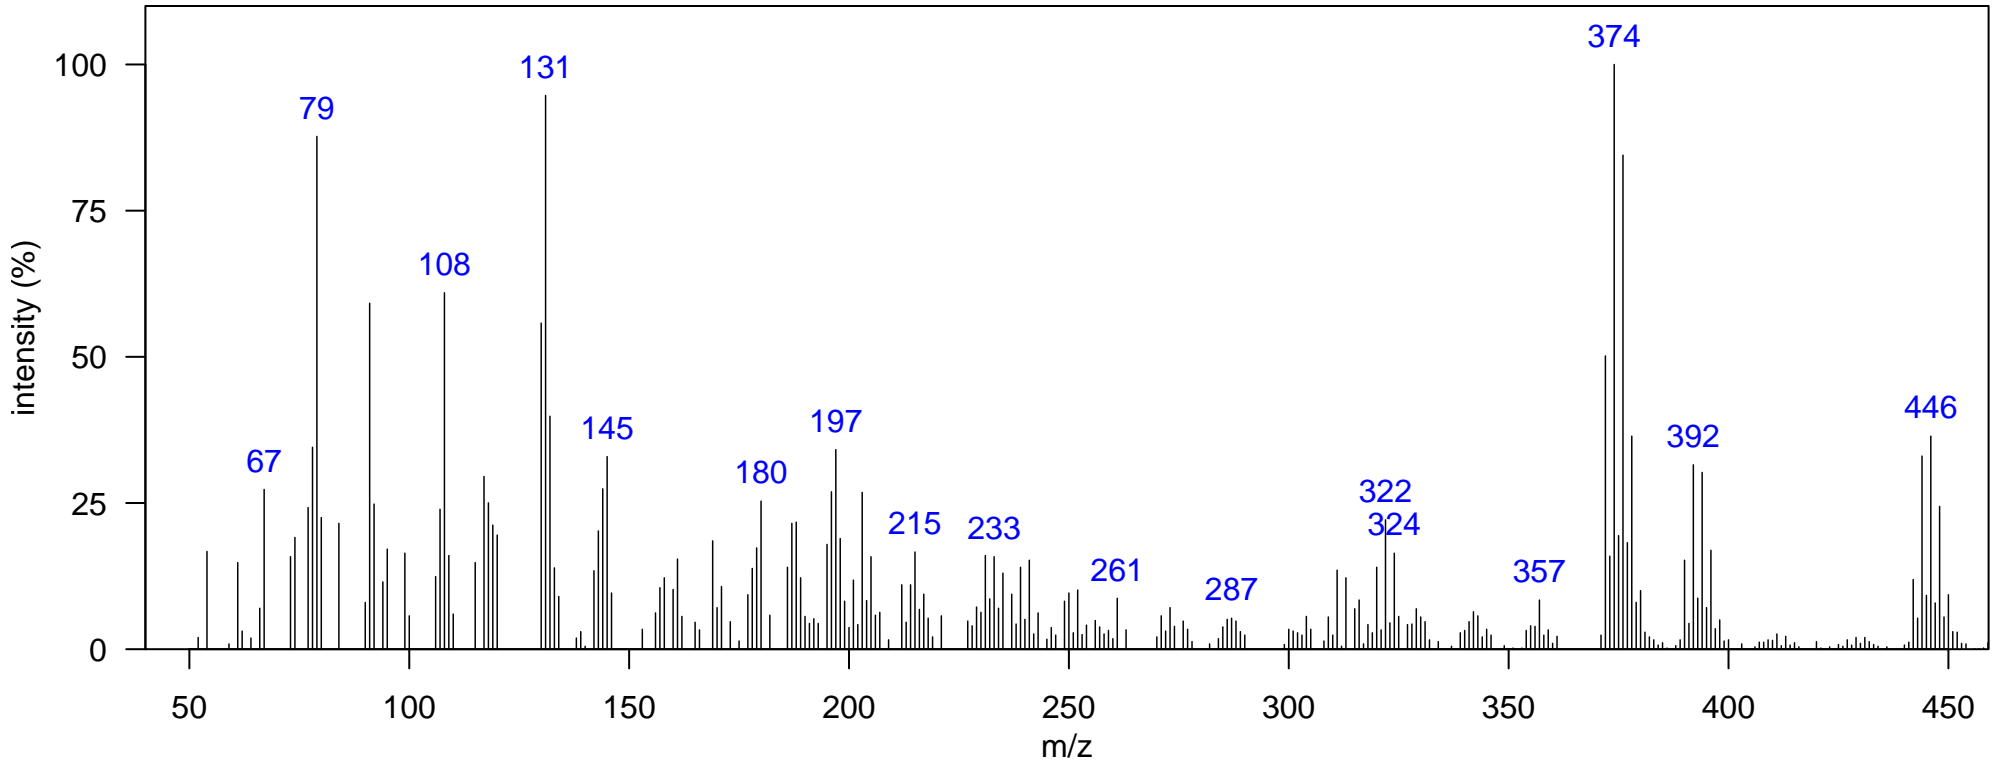

| m/z [Fragment]                        |
|---------------------------------------|
| 392 PCB Interference                  |
| 372 [M-Cl <sub>2</sub> ] <sup>+</sup> |
| 442 M <sup>+</sup>                    |

Name: unknown-2-9

Class: Unknown-2

Matrix: South Atlantic Dolphin Blubber  
In N. Atlantic: TRUE, In N. Pacific: TRUE  
Typically Monitored: FALSE  
Comment: unknown-4-14 (Pacific Library). Hypothesized PCDE or OH-PCB

Instrument: GCxGC-TOF, EI, 70 eV  
1D RT, 2D RT (s): 1614.42, 1.287  
Quantitative Ion m/z: 446

Elemental Formula: C<sub>12</sub>H<sub>2</sub>Cl<sub>8</sub>O  
Source: unknown  
Identification: NA

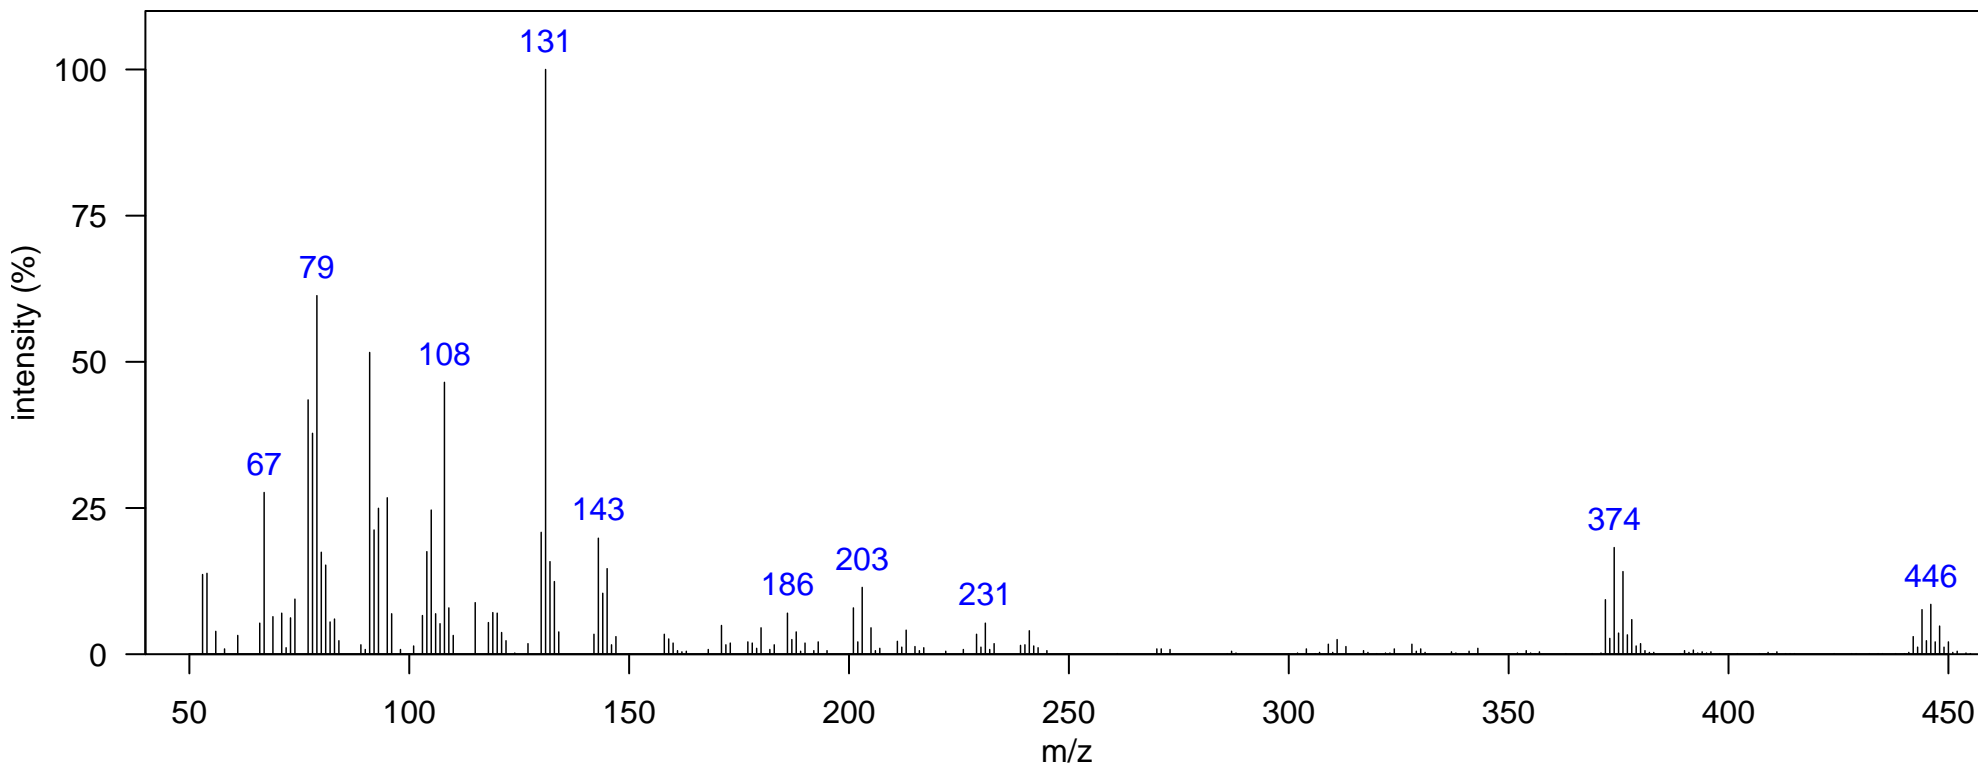

| m/z [Fragment]                        |
|---------------------------------------|
| 372 [M-Cl <sub>2</sub> ] <sup>+</sup> |
| 442 M <sup>+</sup>                    |

Name: unknown-2-10

Class: Unknown-2

Matrix: South Atlantic Dolphin Blubber  
In N. Atlantic: TRUE, In N. Pacific: TRUE  
Typically Monitored: FALSE  
Comment: unknown-4-15 (Pacific Library). Hypothesized PCDE or OH-PCB

Instrument: GCxGC-TOF, EI, 70 eV  
1D RT, 2D RT (s): 1621.42, 1.28  
Quantitative Ion m/z: 446

Elemental Formula: C<sub>12</sub>H<sub>2</sub>Cl<sub>8</sub>O  
Source: unknown  
Identification: NA

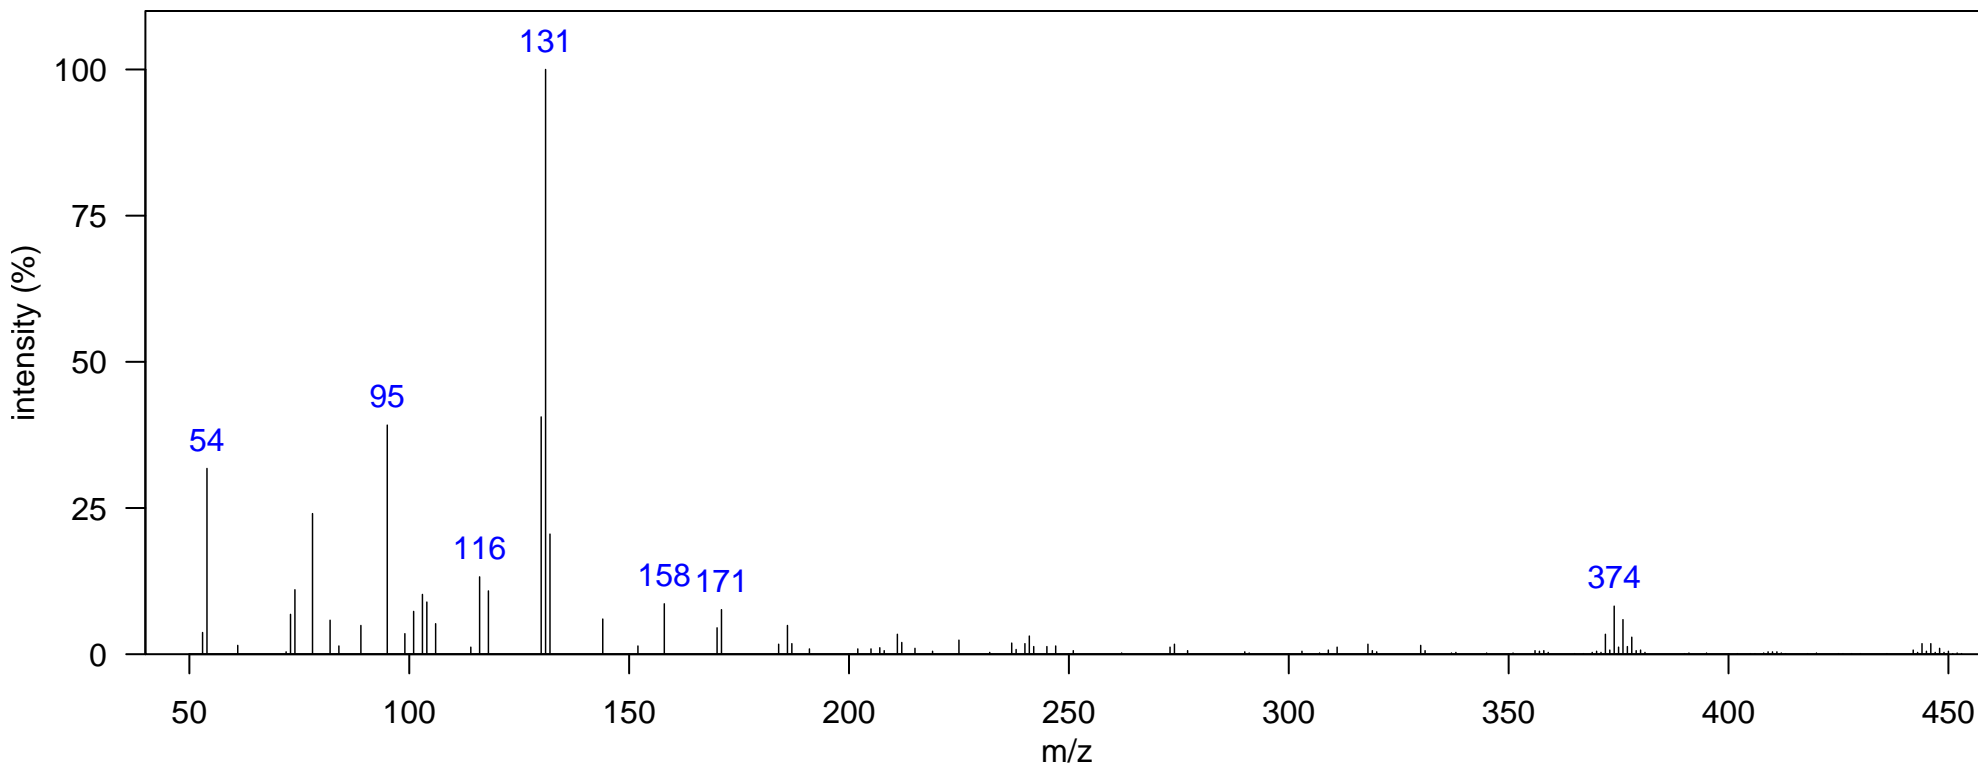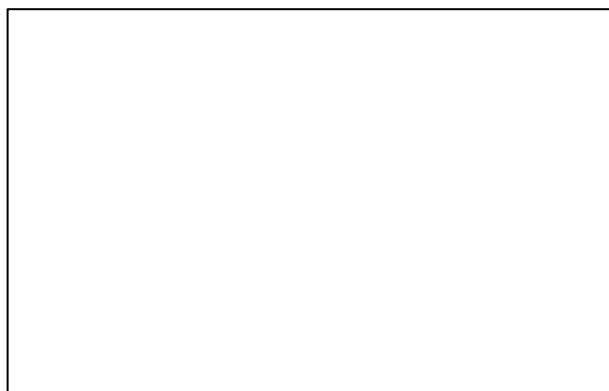

| m/z [Fragment]                        |
|---------------------------------------|
| 372 [M-Cl <sub>2</sub> ] <sup>+</sup> |
| 442 M <sup>+</sup>                    |

Name: unknown-2-11

Class: Unknown-2

Matrix: South Atlantic Dolphin Blubber  
In N. Atlantic: TRUE, In N. Pacific: TRUE  
Typically Monitored: FALSE  
Comment: unknown-4-16 (Pacific Library). Hypothesized PCDE or OH-PCB

Instrument: GCxGC-TOF, EI, 70 eV  
1D RT, 2D RT (s): 1638.91, 1.366  
Quantitative Ion m/z: 446

Elemental Formula: C<sub>12</sub>H<sub>2</sub>Cl<sub>8</sub>O  
Source: unknown  
Identification: NA

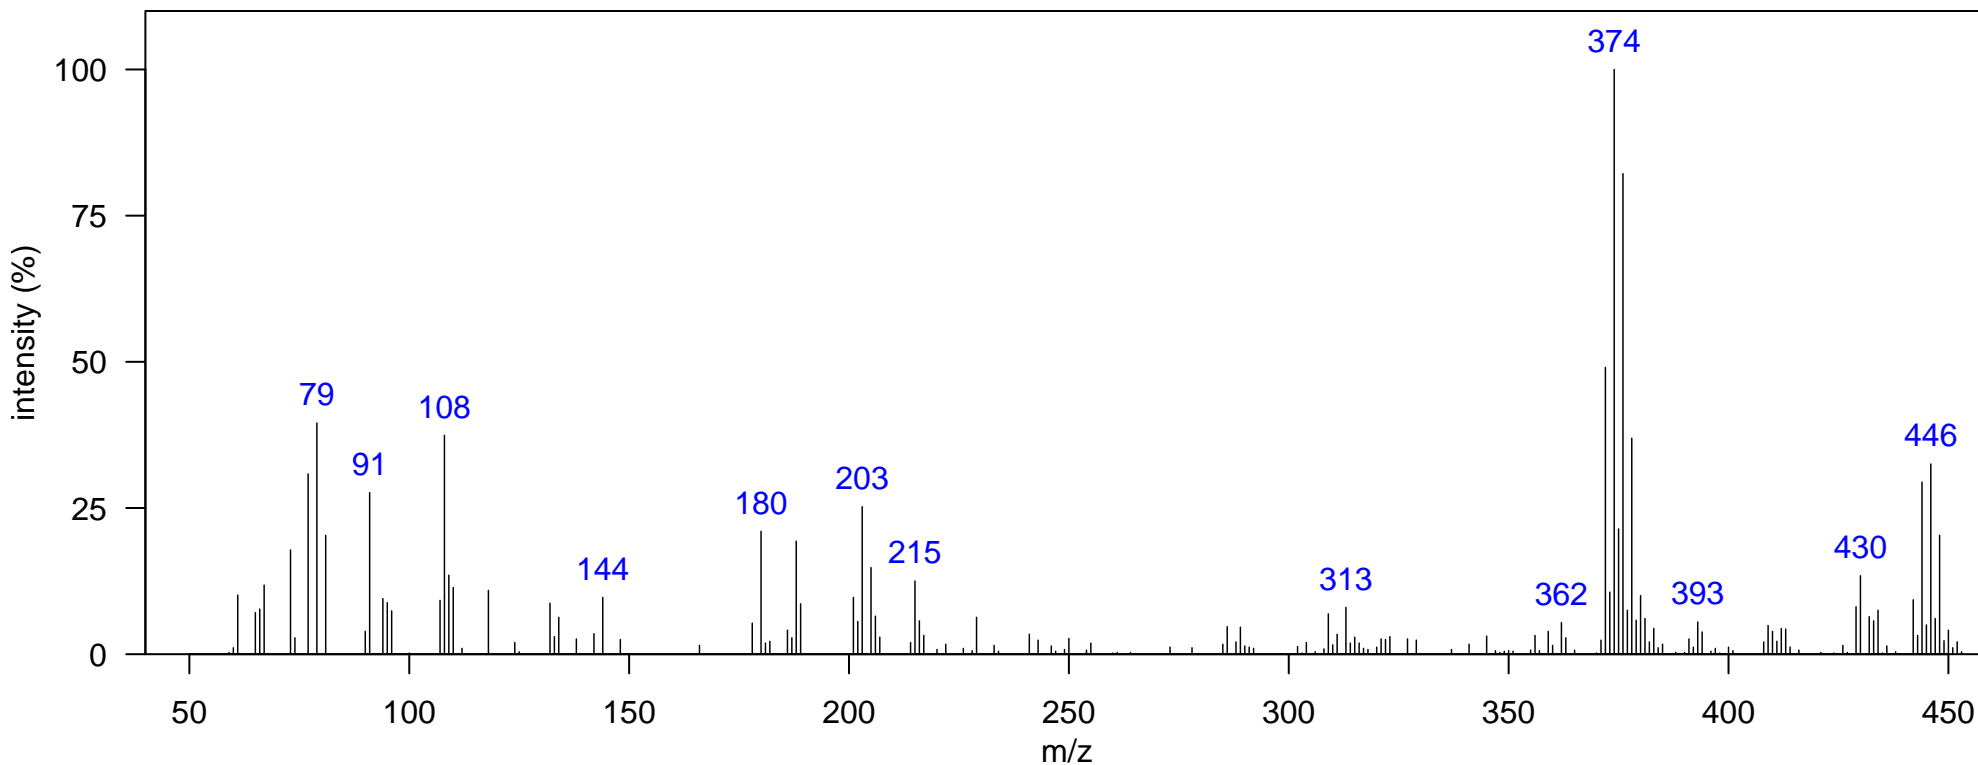

| m/z [Fragment]                        |
|---------------------------------------|
| 372 [M-Cl <sub>2</sub> ] <sup>+</sup> |
| 442 M <sup>+</sup>                    |

Name: unknown-2-12

Class: Unknown-2

Matrix: South Atlantic Dolphin Blubber  
In N. Atlantic: FALSE, In N. Pacific: FALSE  
Typically Monitored: FALSE  
Comment:

Instrument: GCxGC-TOF, EI, 70 eV  
1D RT, 2D RT (s): 1715.86, 1.36  
Quantitative Ion m/z: 480

Elemental Formula: C<sub>12</sub>HCl<sub>9</sub>O  
Source: unknown  
Identification: NA

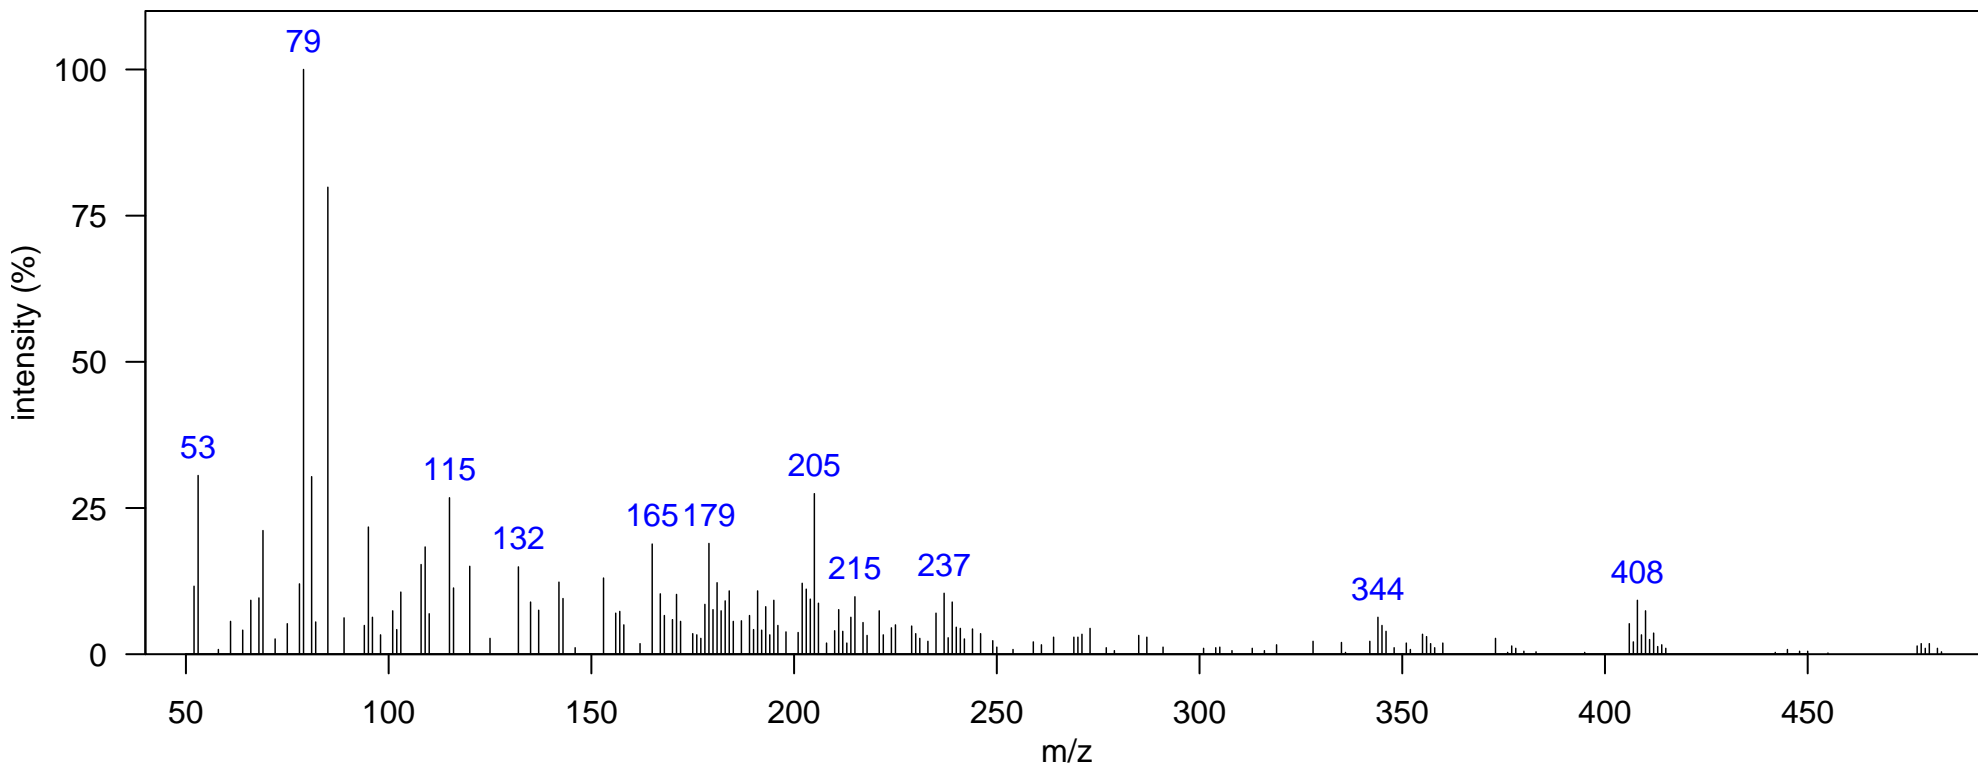

| m/z [Fragment]                        |
|---------------------------------------|
| 406 [M-Cl <sub>2</sub> ] <sup>+</sup> |
| 476 M <sup>+</sup>                    |

Name: unknown-2-13

Class: Unknown-2

Matrix: South Atlantic Dolphin Blubber  
In N. Atlantic: TRUE, In N. Pacific: TRUE  
Typically Monitored: FALSE  
Comment: unknown-4-17 (Pacific Library). Hypothesized PCDE or OH-PCB

Instrument: GCxGC-TOF, EI, 70 eV  
1D RT, 2D RT (s): 1729.85, 1.393  
Quantitative Ion m/z: 480

Elemental Formula: C<sub>12</sub>HCl<sub>9</sub>O  
Source: unknown  
Identification: NA

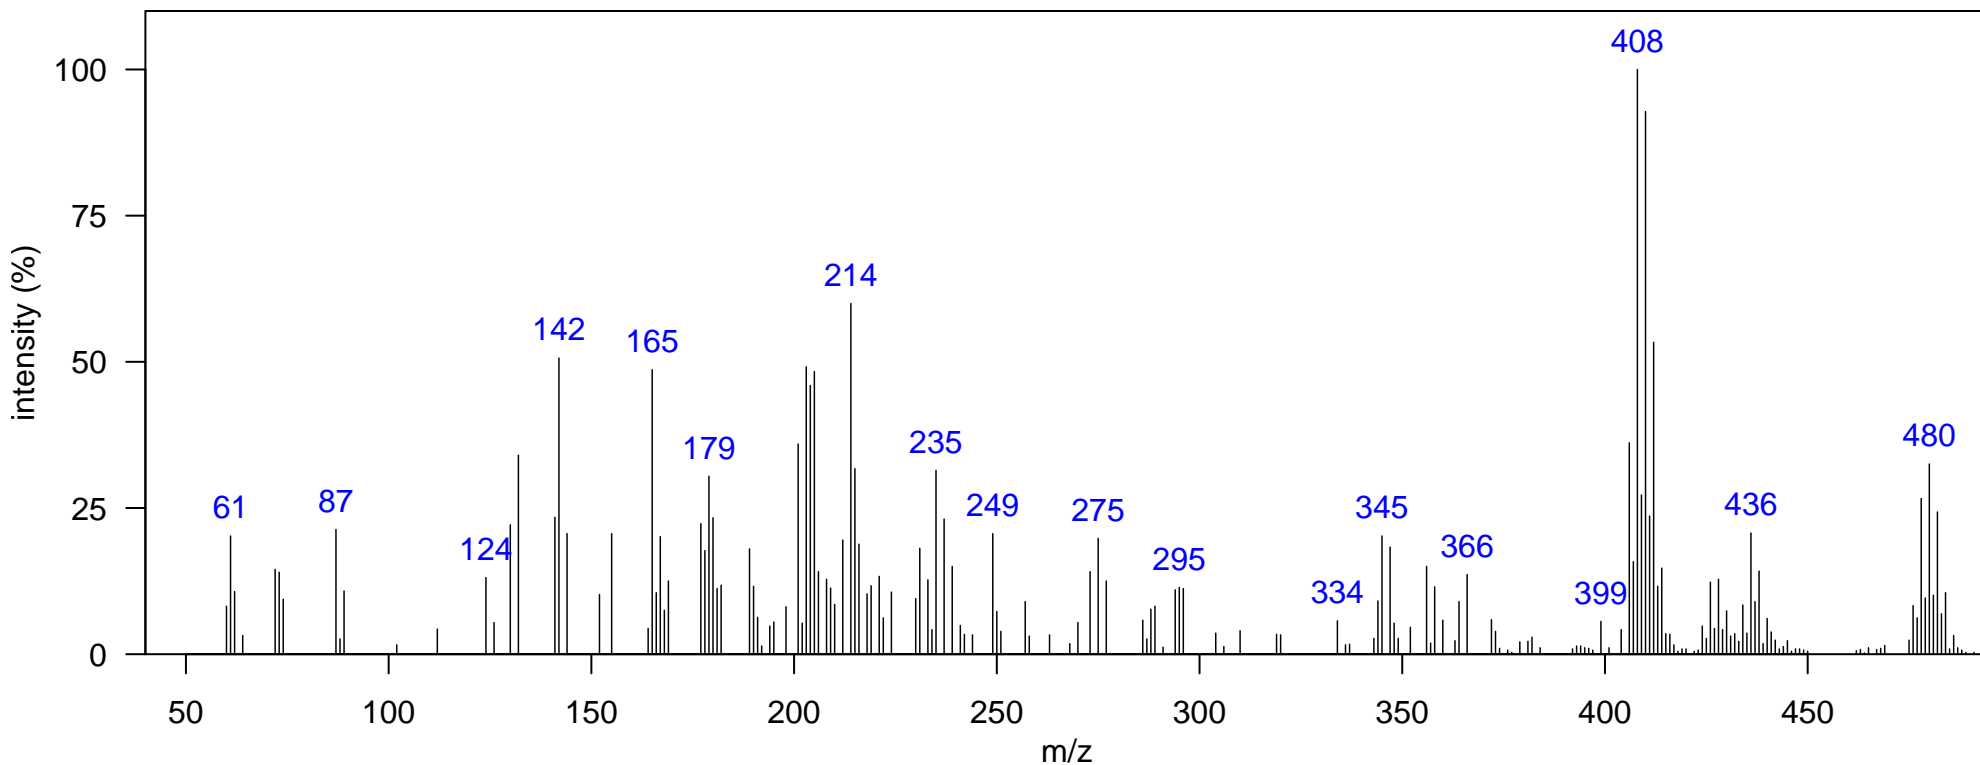

| m/z [Fragment]                        |
|---------------------------------------|
| 428 PCB Interference                  |
| 406 [M-Cl <sub>2</sub> ] <sup>+</sup> |
| 476 M <sup>+</sup>                    |



Name: unknown-2-14

Class: Unknown-2

Matrix: South Atlantic Dolphin Blubber  
In N. Atlantic: FALSE, In N. Pacific: FALSE  
Typically Monitored: FALSE  
Comment:

Instrument: GCxGC-TOF, EI, 70 eV  
1D RT, 2D RT (s): 1750.84, 1.333  
Quantitative Ion m/z: 480

Elemental Formula: C<sub>12</sub>HCl<sub>9</sub>O  
Source: unknown  
Identification: NA

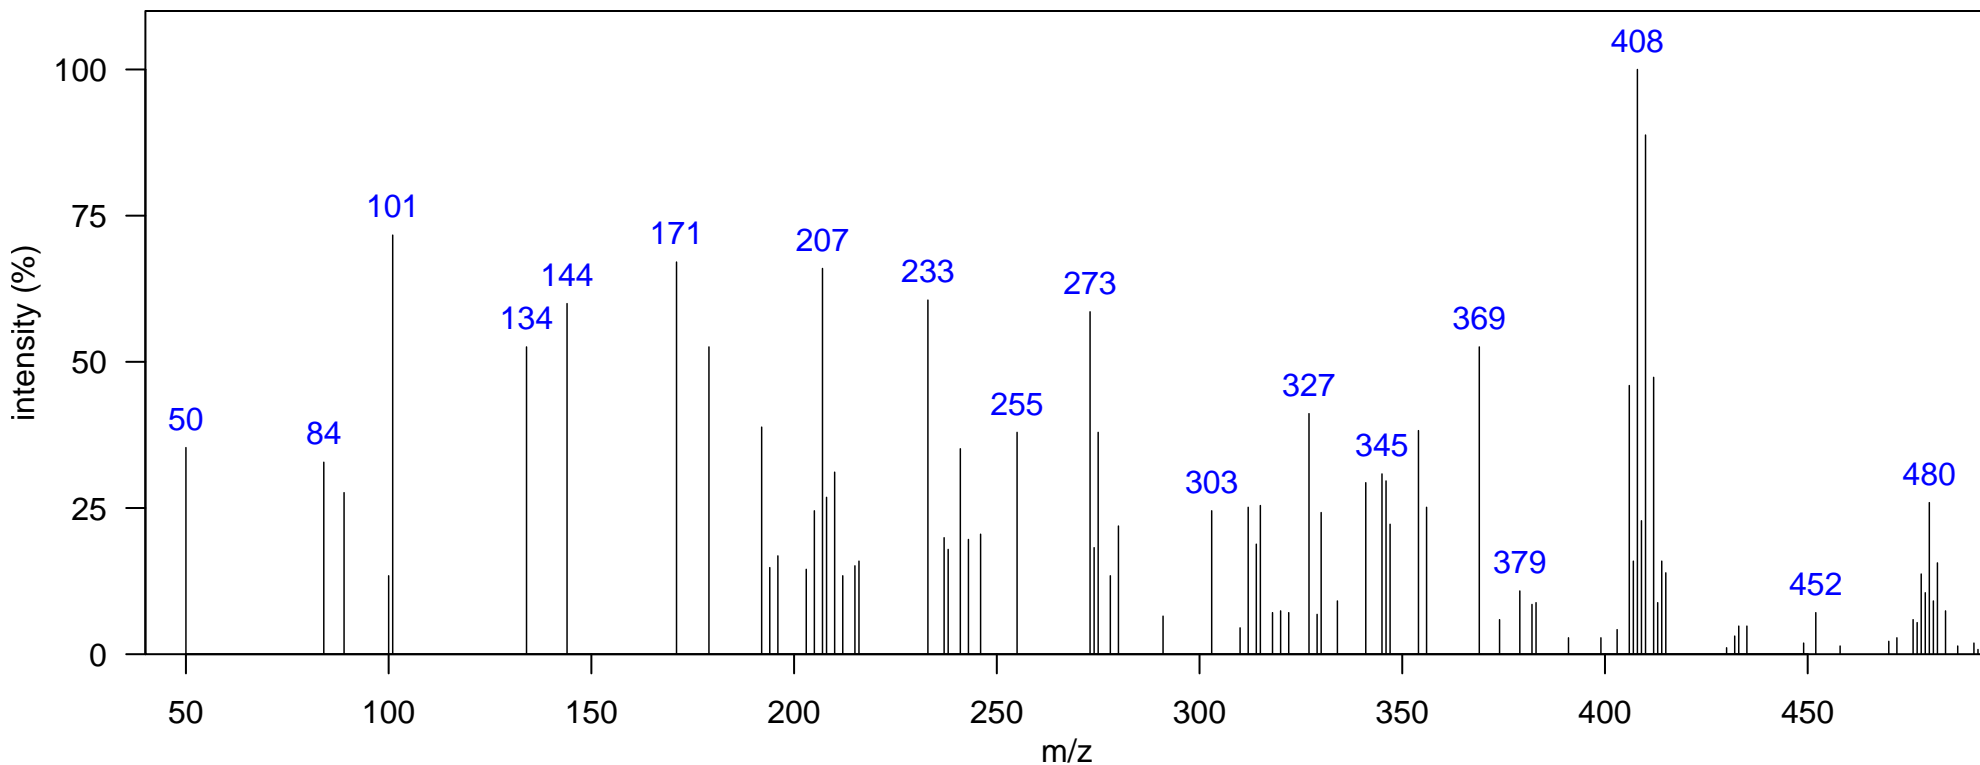

| m/z [Fragment]                        |
|---------------------------------------|
| 406 [M-Cl <sub>2</sub> ] <sup>+</sup> |
| 476 M <sup>+</sup>                    |

Name: unknown-3-1

Class: Unknown-3

Matrix: South Atlantic Dolphin Blubber  
In N. Atlantic: TRUE, In N. Pacific: TRUE  
Typically Monitored: FALSE  
Comment: unknown-5-2 (Pacific Library)

Instrument: GCxGC-TOF, EI, 70 eV  
1D RT, 2D RT (s): 1484.99, 1.069  
Quantitative Ion m/z: 449

Elemental Formula:  
Source: unknown  
Identification: NA

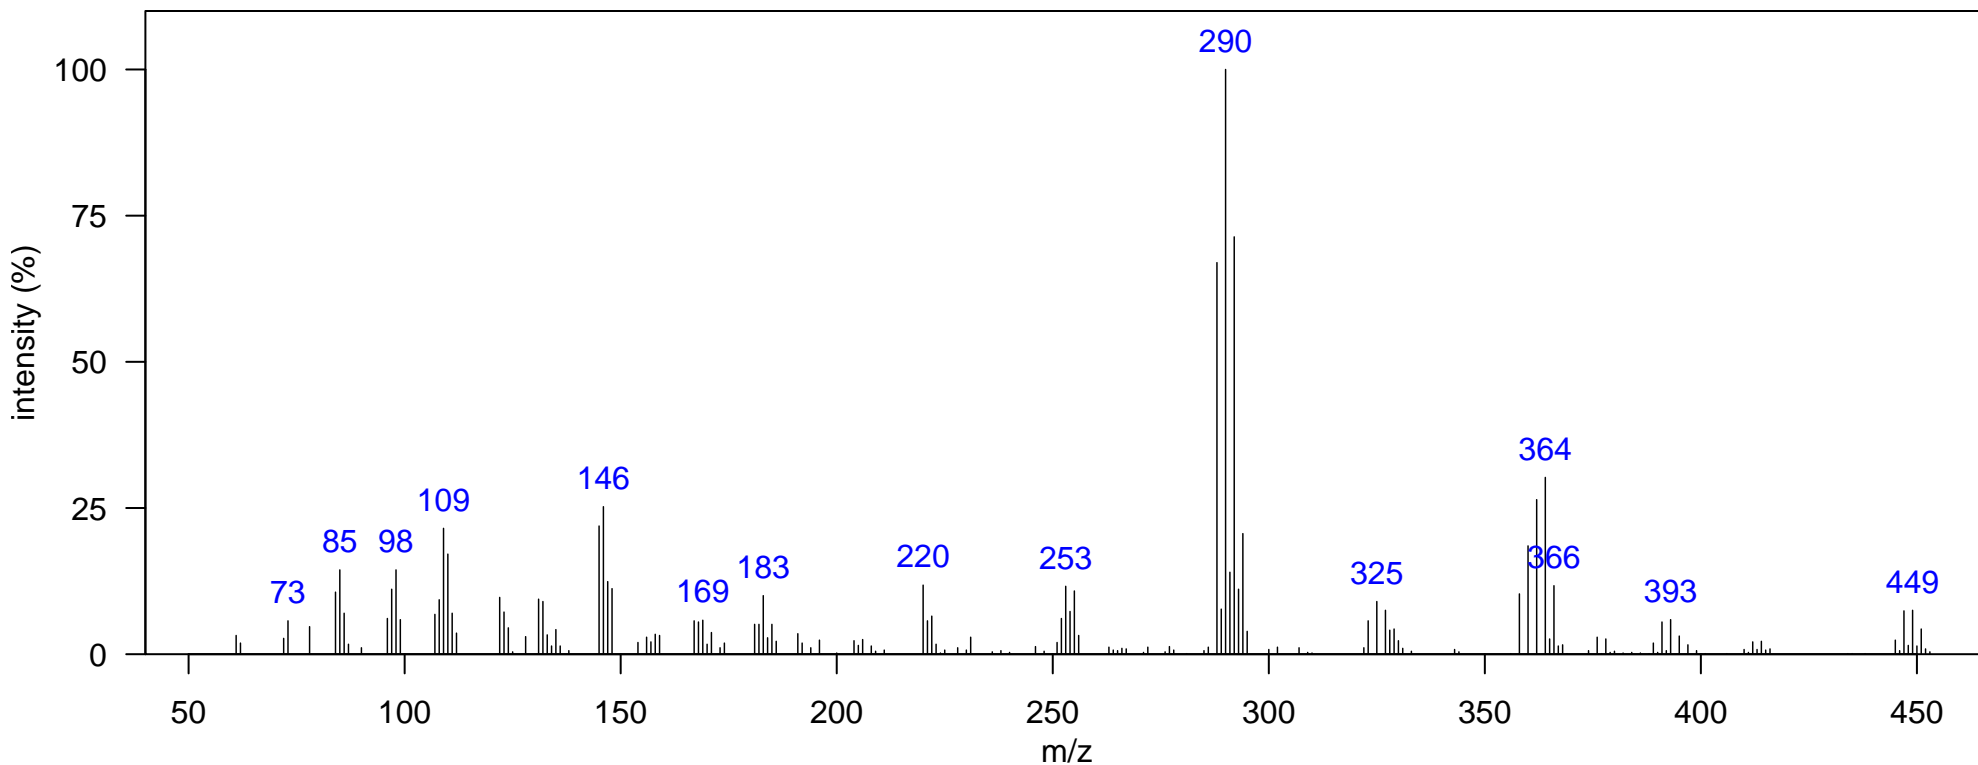

| m/z [Fragment] |
|----------------|
|----------------|

Name: unknown-4-1

Class: Unknown-4

Matrix: South Atlantic Dolphin Blubber  
In N. Atlantic: FALSE, In N. Pacific: FALSE  
Typically Monitored: FALSE  
Comment:

Instrument: GCxGC-TOF, EI, 70 eV  
1D RT, 2D RT (s): 1593.43, 1.399  
Quantitative Ion m/z: 370

Elemental Formula:  
Source: unknown  
Identification: NA

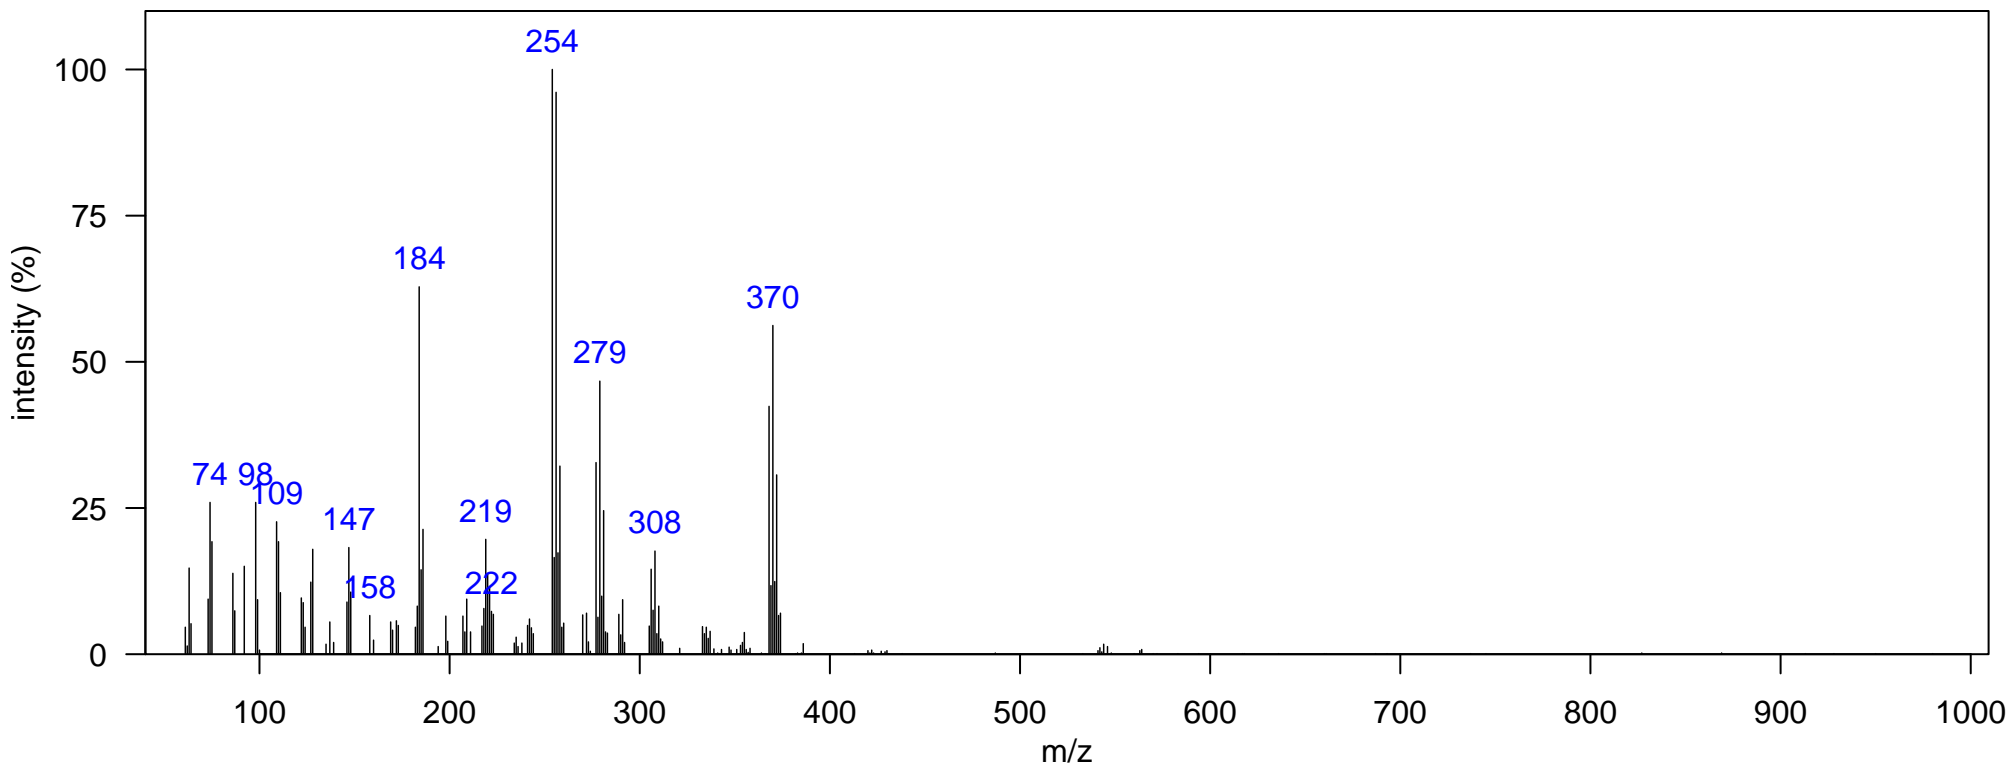

| m/z [Fragment] |
|----------------|
|----------------|

Name: unknown-4-2

Class: Unknown-4

Matrix: South Atlantic Dolphin Blubber  
In N. Atlantic: FALSE, In N. Pacific: TRUE  
Typically Monitored: FALSE  
Comment: unknown-6-1 (Pacific Library)

Instrument: GCxGC-TOF, EI, 70 eV  
1D RT, 2D RT (s): 1610.92, 1.492  
Quantitative Ion m/z: 370

Elemental Formula:  
Source: unknown  
Identification: NA

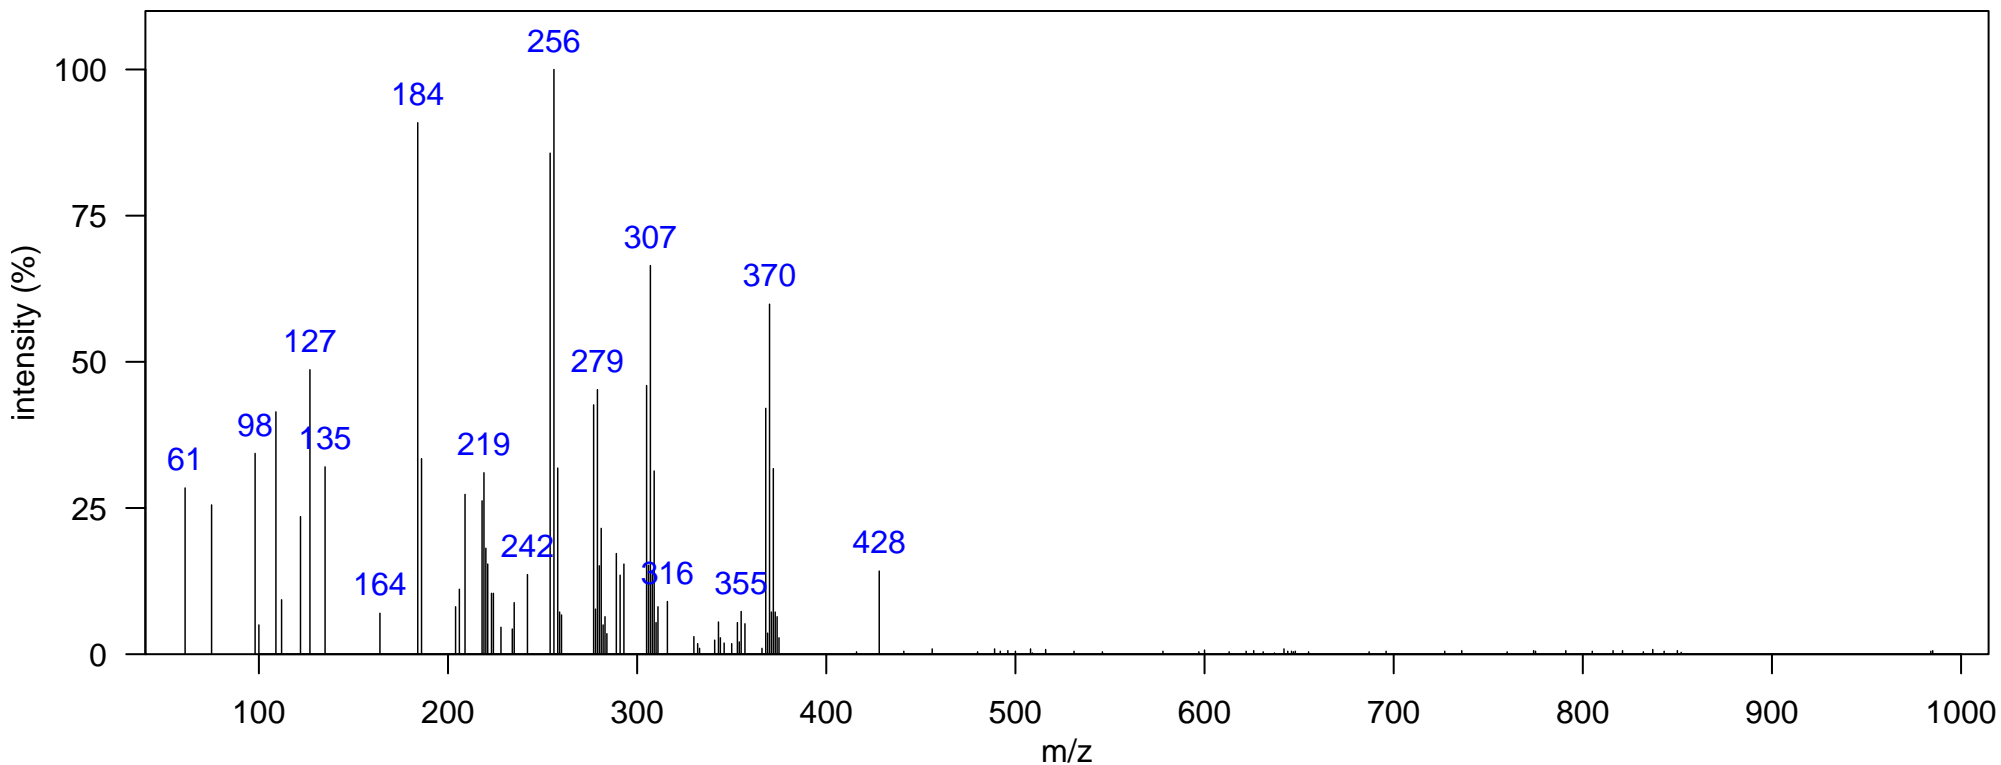

| m/z [Fragment] |
|----------------|
|----------------|

Name: unknown-5-1

Class: Unknown-5

Matrix: South Atlantic Dolphin Blubber  
In N. Atlantic: FALSE, In N. Pacific: FALSE  
Typically Monitored: FALSE  
Comment:

Instrument: GCxGC-TOF, EI, 70 eV  
1D RT, 2D RT (s): 1799.81, 1.531  
Quantitative Ion m/z: 448

Elemental Formula:  
Source: unknown  
Identification: NA

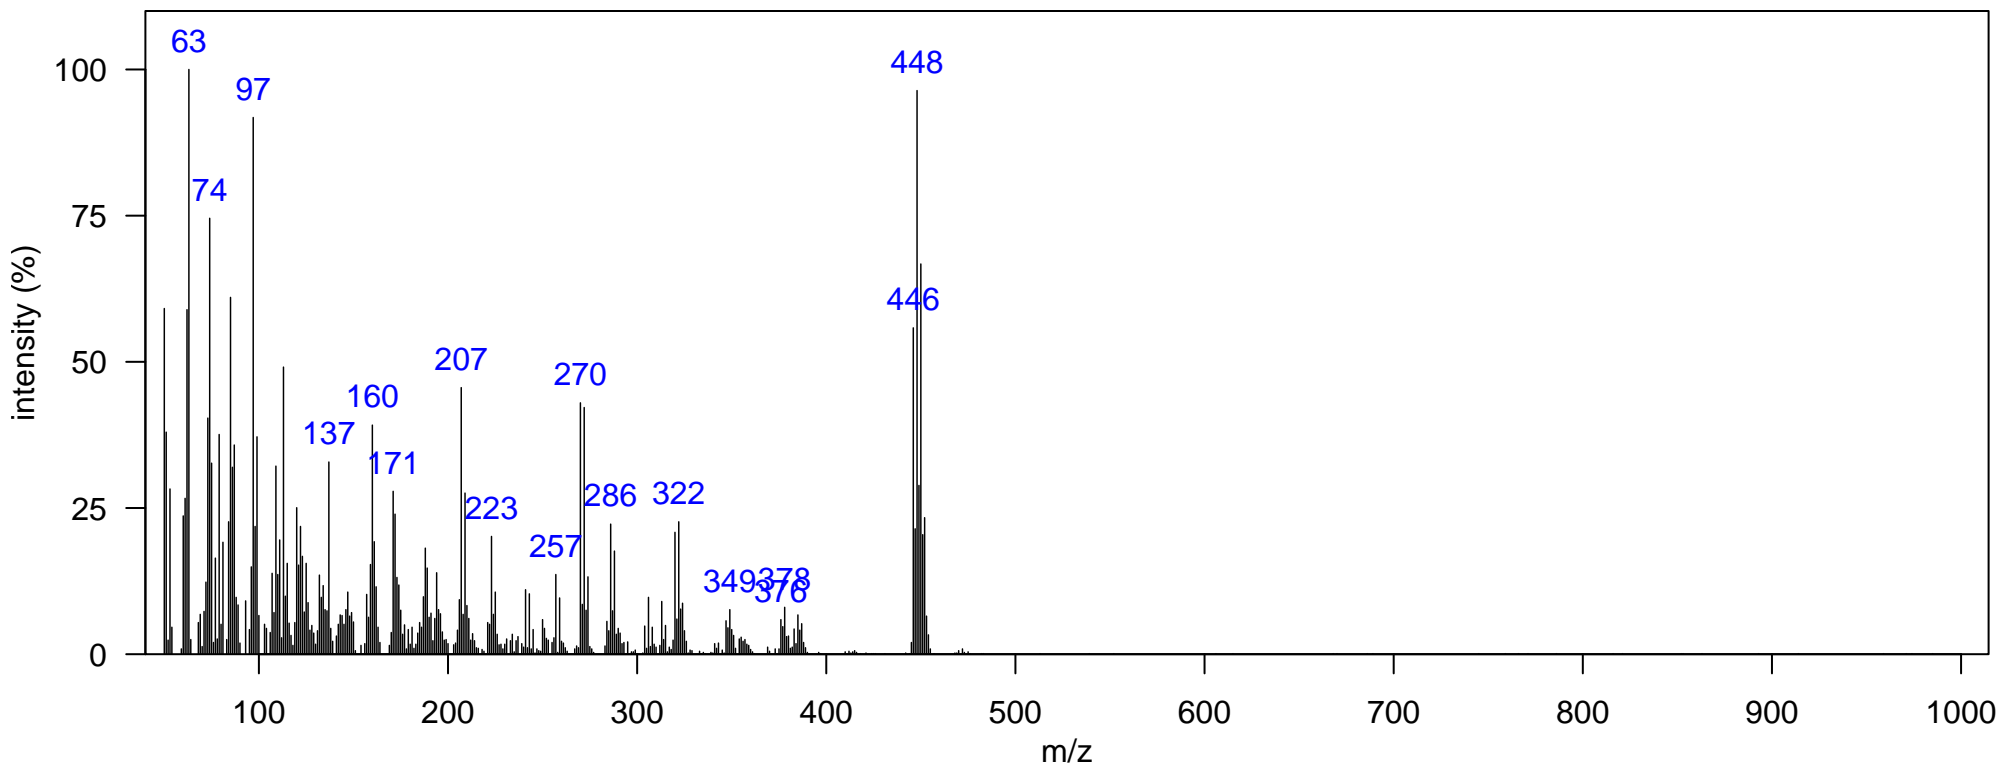

| m/z [Fragment] |
|----------------|
|----------------|

Name: unknown-5-2

Class: Unknown-5

Matrix: South Atlantic Dolphin Blubber  
In N. Atlantic: FALSE, In N. Pacific: FALSE  
Typically Monitored: FALSE  
Comment:

Instrument: GCxGC-TOF, EI, 70 eV  
1D RT, 2D RT (s): 1862.78, 1.828  
Quantitative Ion m/z: 448

Elemental Formula:  
Source: unknown  
Identification: NA

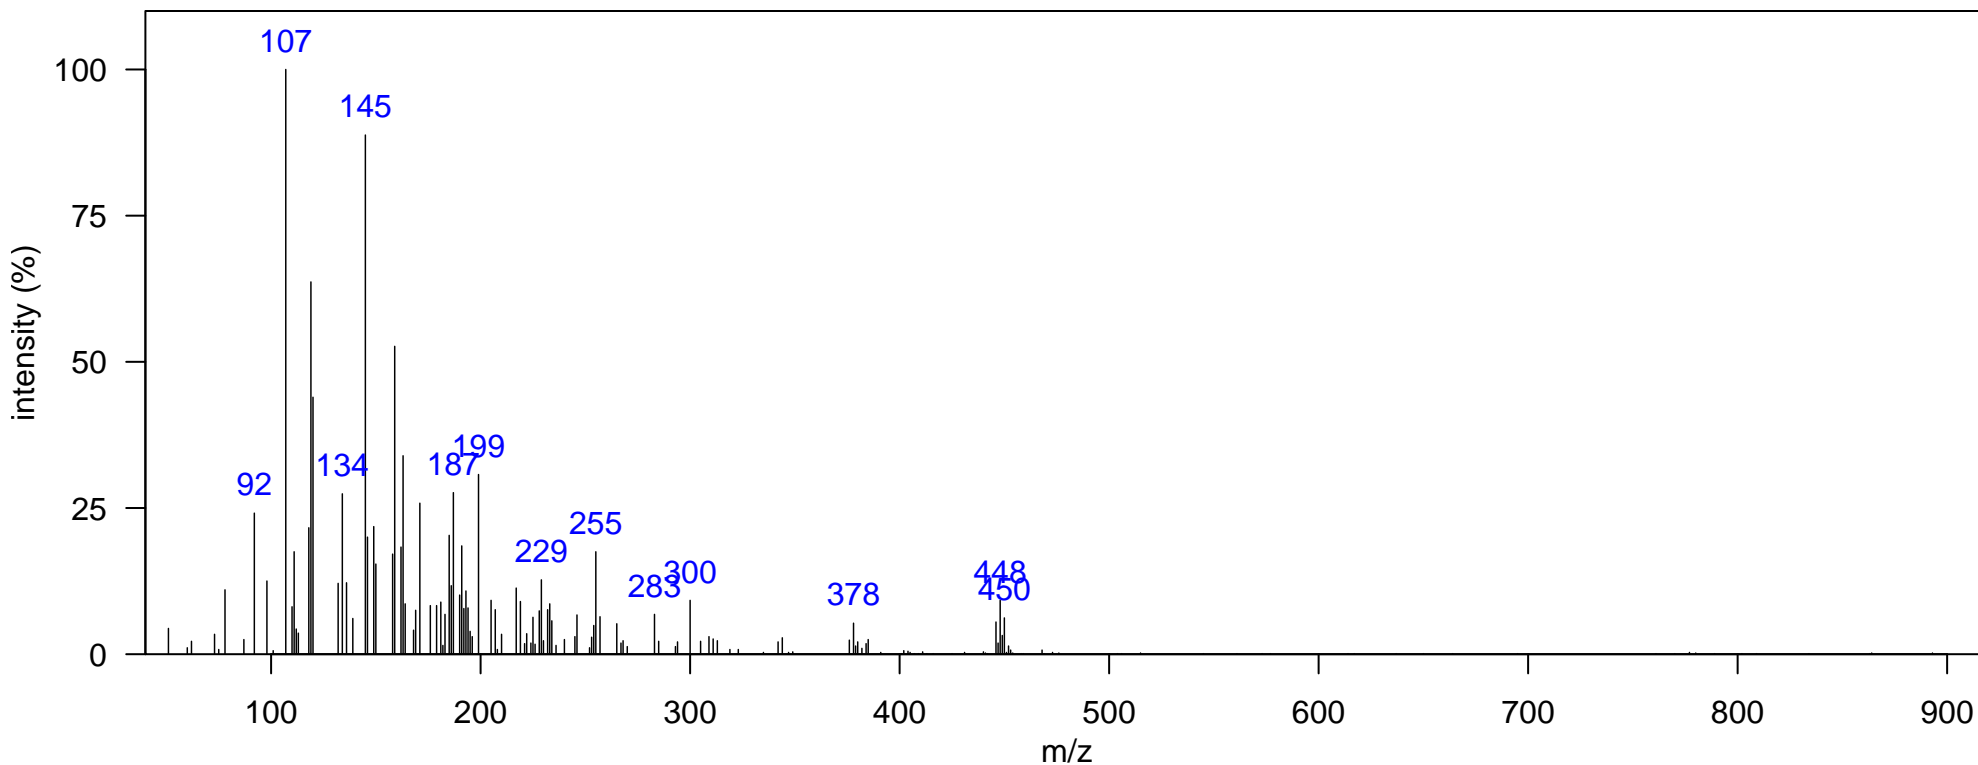

| m/z [Fragment] |
|----------------|
|----------------|

Name: unknown-5-3

Class: Unknown-5

Matrix: South Atlantic Dolphin Blubber  
In N. Atlantic: FALSE, In N. Pacific: FALSE  
Typically Monitored: FALSE  
Comment:

Instrument: GCxGC-TOF, EI, 70 eV  
1D RT, 2D RT (s): 1869.77, 1.703  
Quantitative Ion m/z: 448

Elemental Formula:  
Source: unknown  
Identification: NA

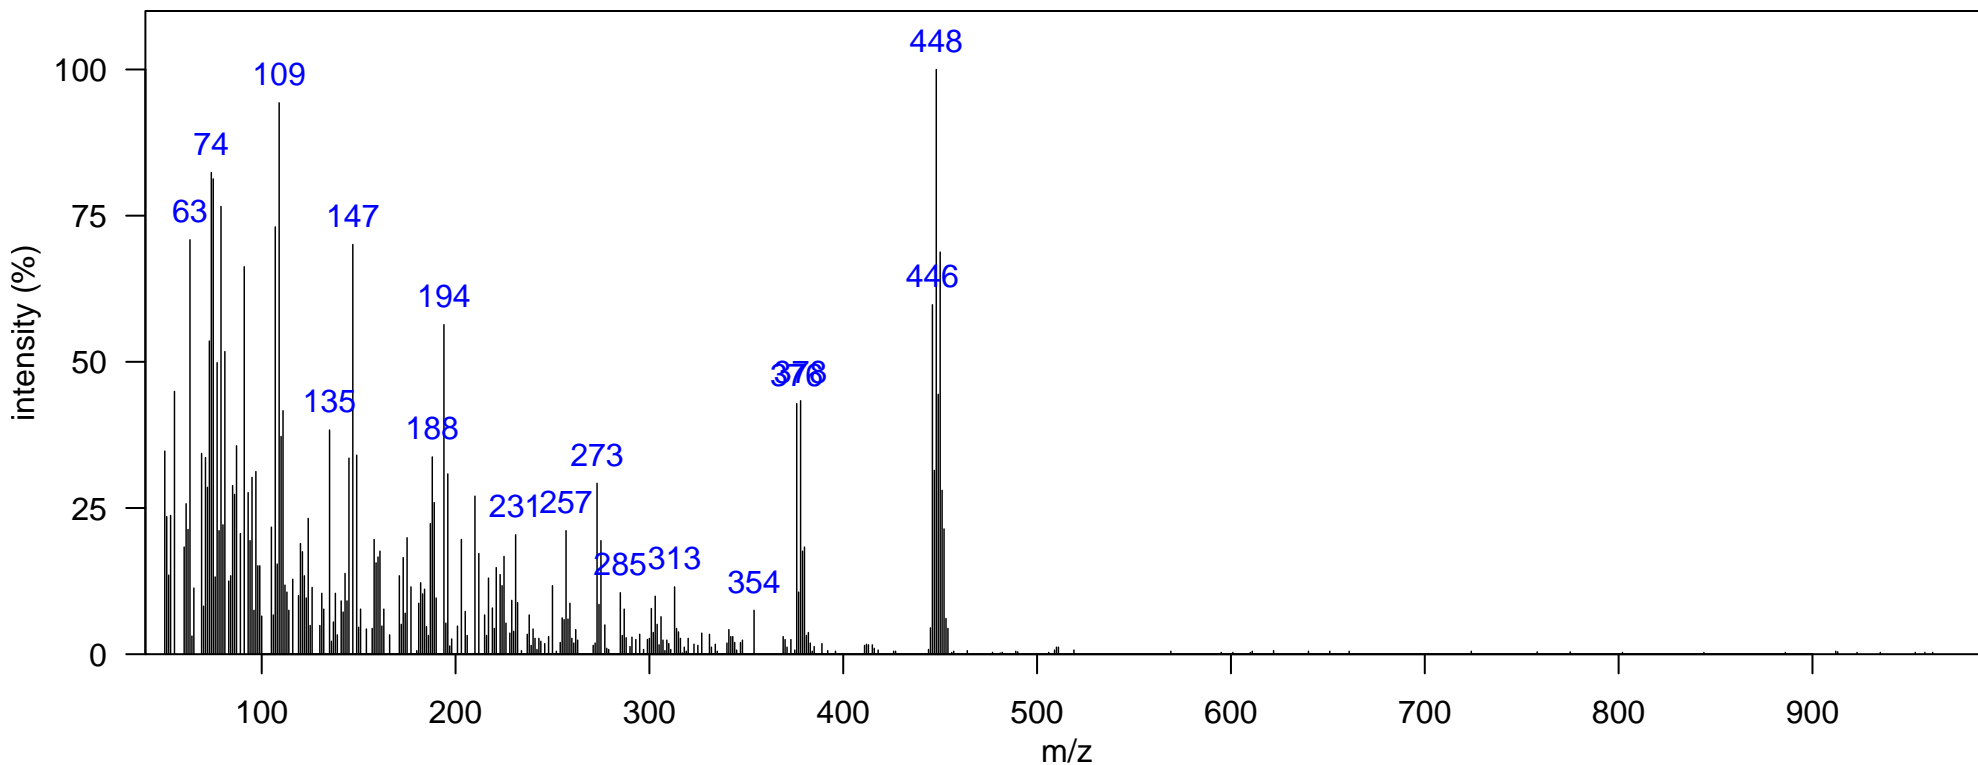

| m/z [Fragment] |
|----------------|
|----------------|

Name: unknown-6

Class: Unknown

Matrix: South Atlantic Dolphin Blubber  
In N. Atlantic: FALSE, In N. Pacific: FALSE  
Typically Monitored: FALSE  
Comment:

Instrument: GCxGC-TOF, EI, 70 eV  
1D RT, 2D RT (s): 725.928, 0.825  
Quantitative Ion m/z: 172

Elemental Formula:  
Source: unknown  
Identification: NA

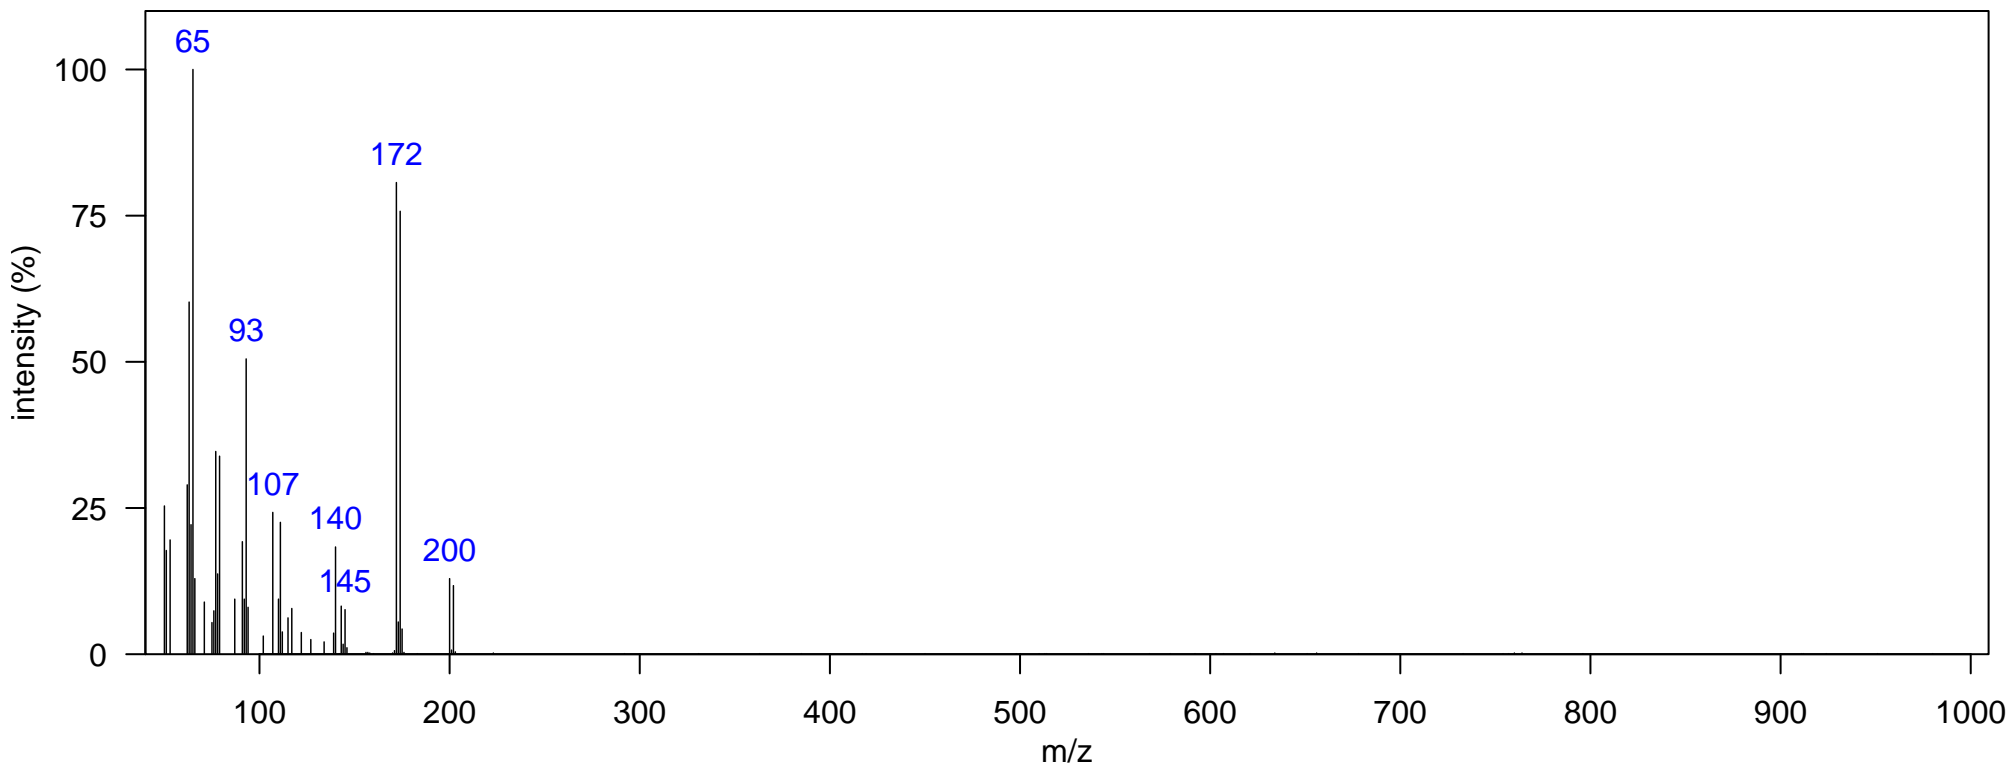

| m/z [Fragment] |
|----------------|
|----------------|



Name: unknown-7

Class: Unknown

Matrix: South Atlantic Dolphin Blubber  
In N. Atlantic: FALSE, In N. Pacific: FALSE  
Typically Monitored: FALSE  
Comment:

Instrument: GCxGC-TOF, EI, 70 eV  
1D RT, 2D RT (s): 876.342, 0.832  
Quantitative Ion m/z: 150

Elemental Formula:  
Source: unknown  
Identification: NA

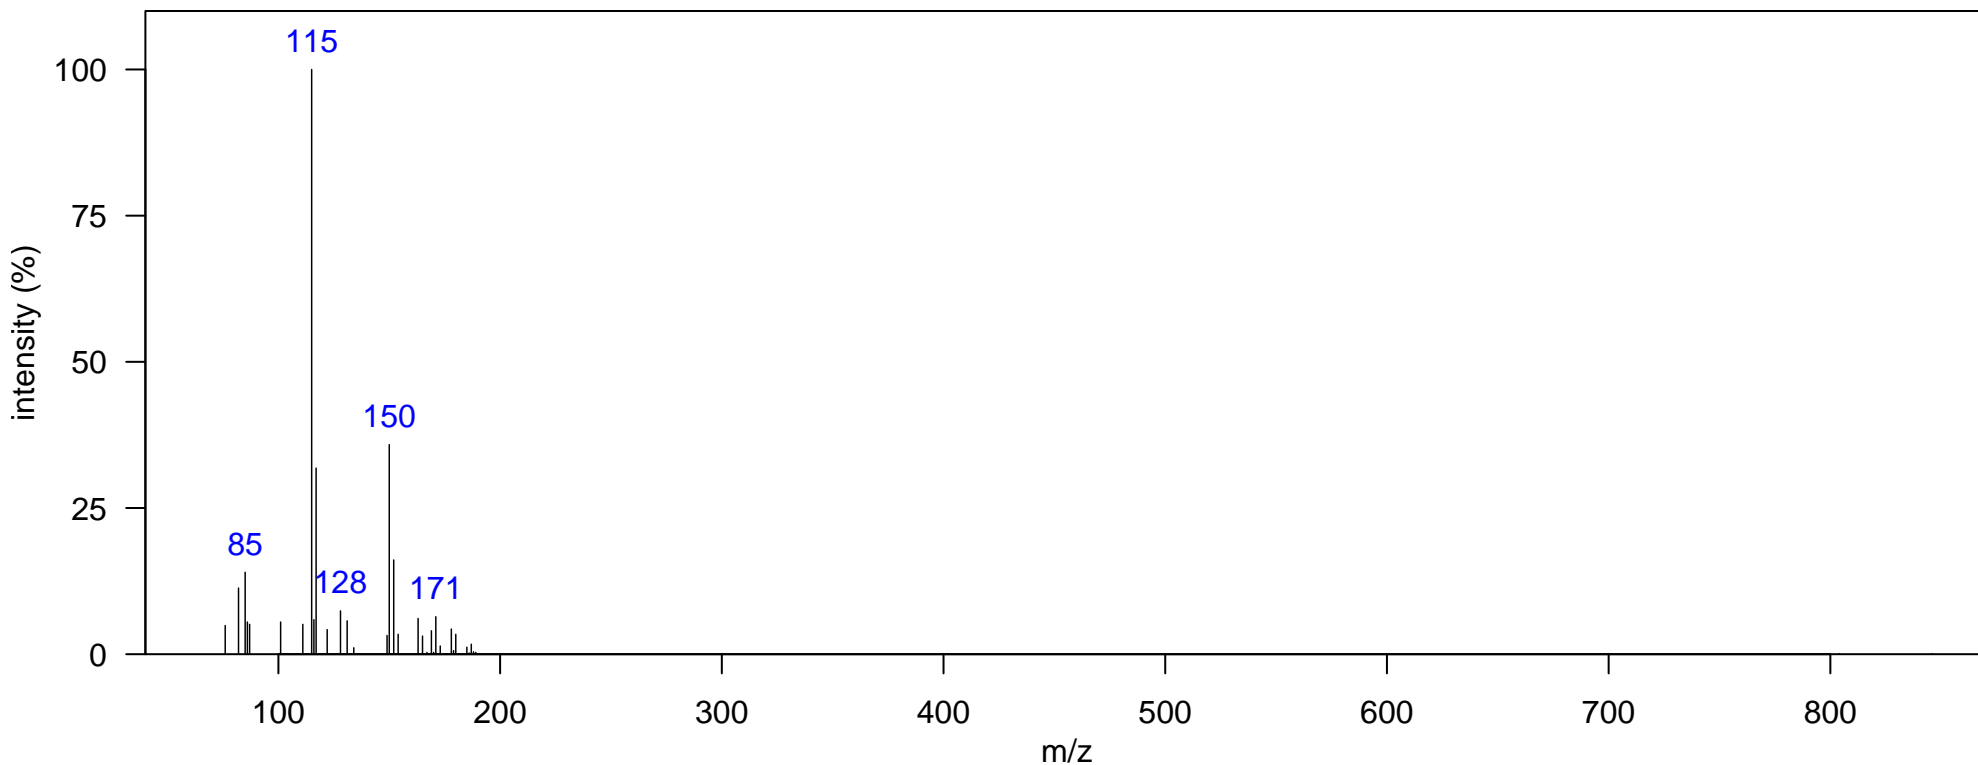

| m/z [Fragment] |
|----------------|
|----------------|

Name: unknown-8

Class: Unknown

Matrix: South Atlantic Dolphin Blubber  
In N. Atlantic: TRUE, In N. Pacific: FALSE  
Typically Monitored: FALSE  
Comment: unknown-6 (N Atlantic Library)

Instrument: GCxGC-TOF, EI, 70 eV  
1D RT, 2D RT (s): 1145.69, 0.924  
Quantitative Ion m/z: 309

Elemental Formula:  
Source: unknown  
Identification: NA

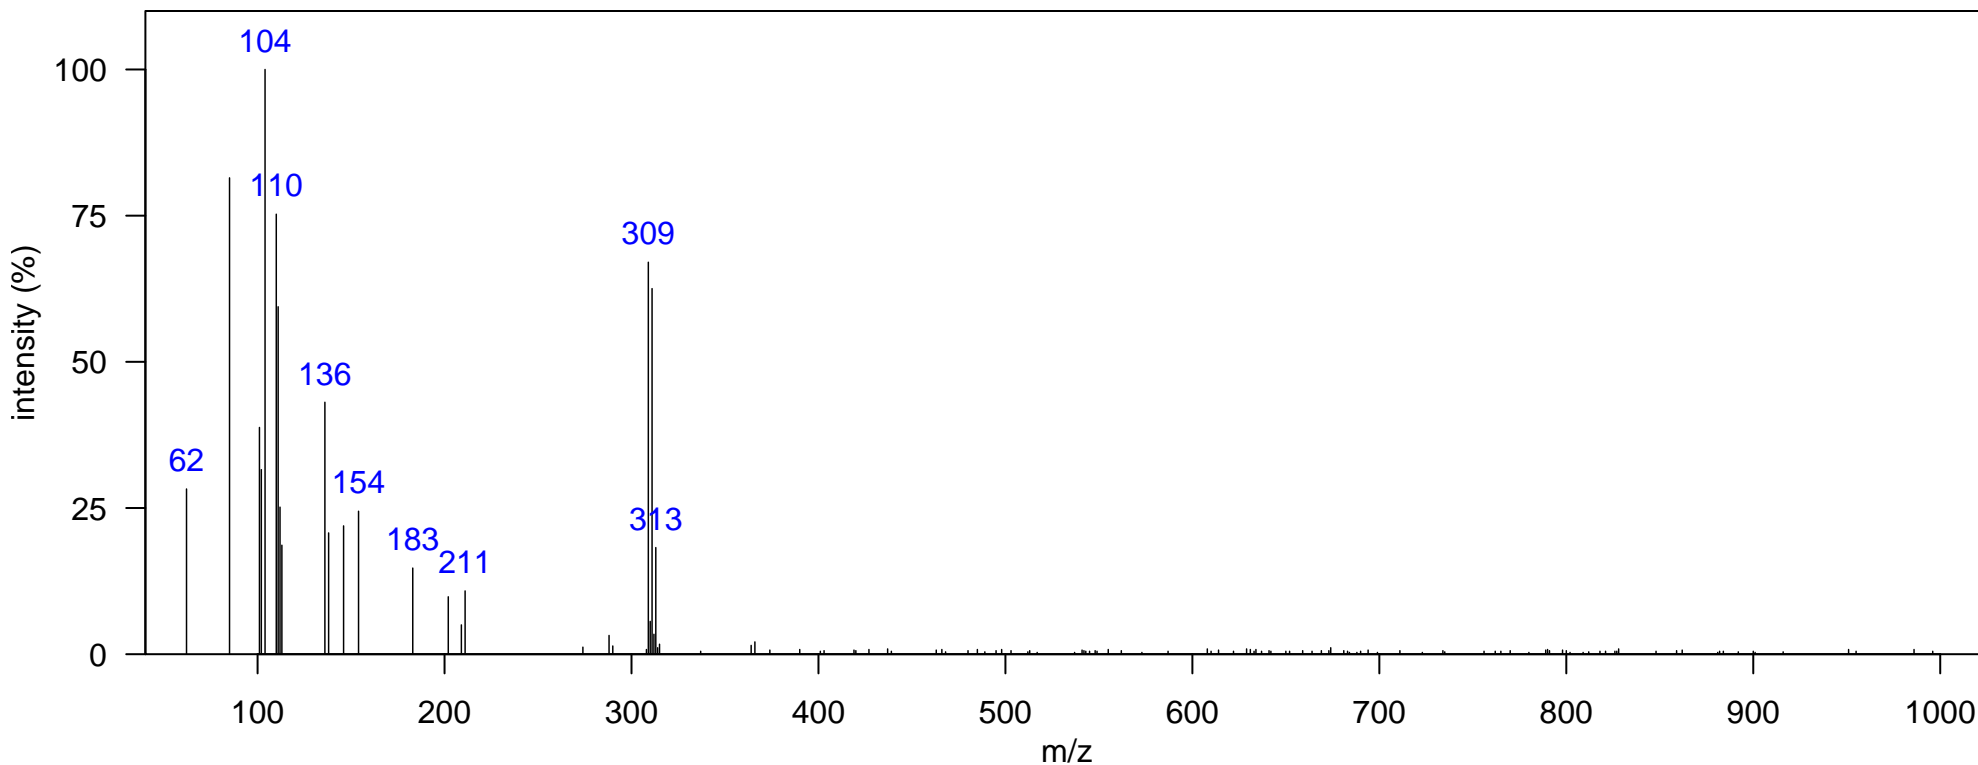

| m/z [Fragment] |
|----------------|
|----------------|

Name: unknown-9

Class: Unknown

Matrix: South Atlantic Dolphin Blubber  
In N. Atlantic: TRUE, In N. Pacific: FALSE  
Typically Monitored: FALSE  
Comment: unknown-8 (N Atlantic Library)

Instrument: GCxGC-TOF, EI, 70 eV  
1D RT, 2D RT (s): 1212.15, 0.904  
Quantitative Ion m/z: 317

Elemental Formula:  
Source: unknown  
Identification: NA

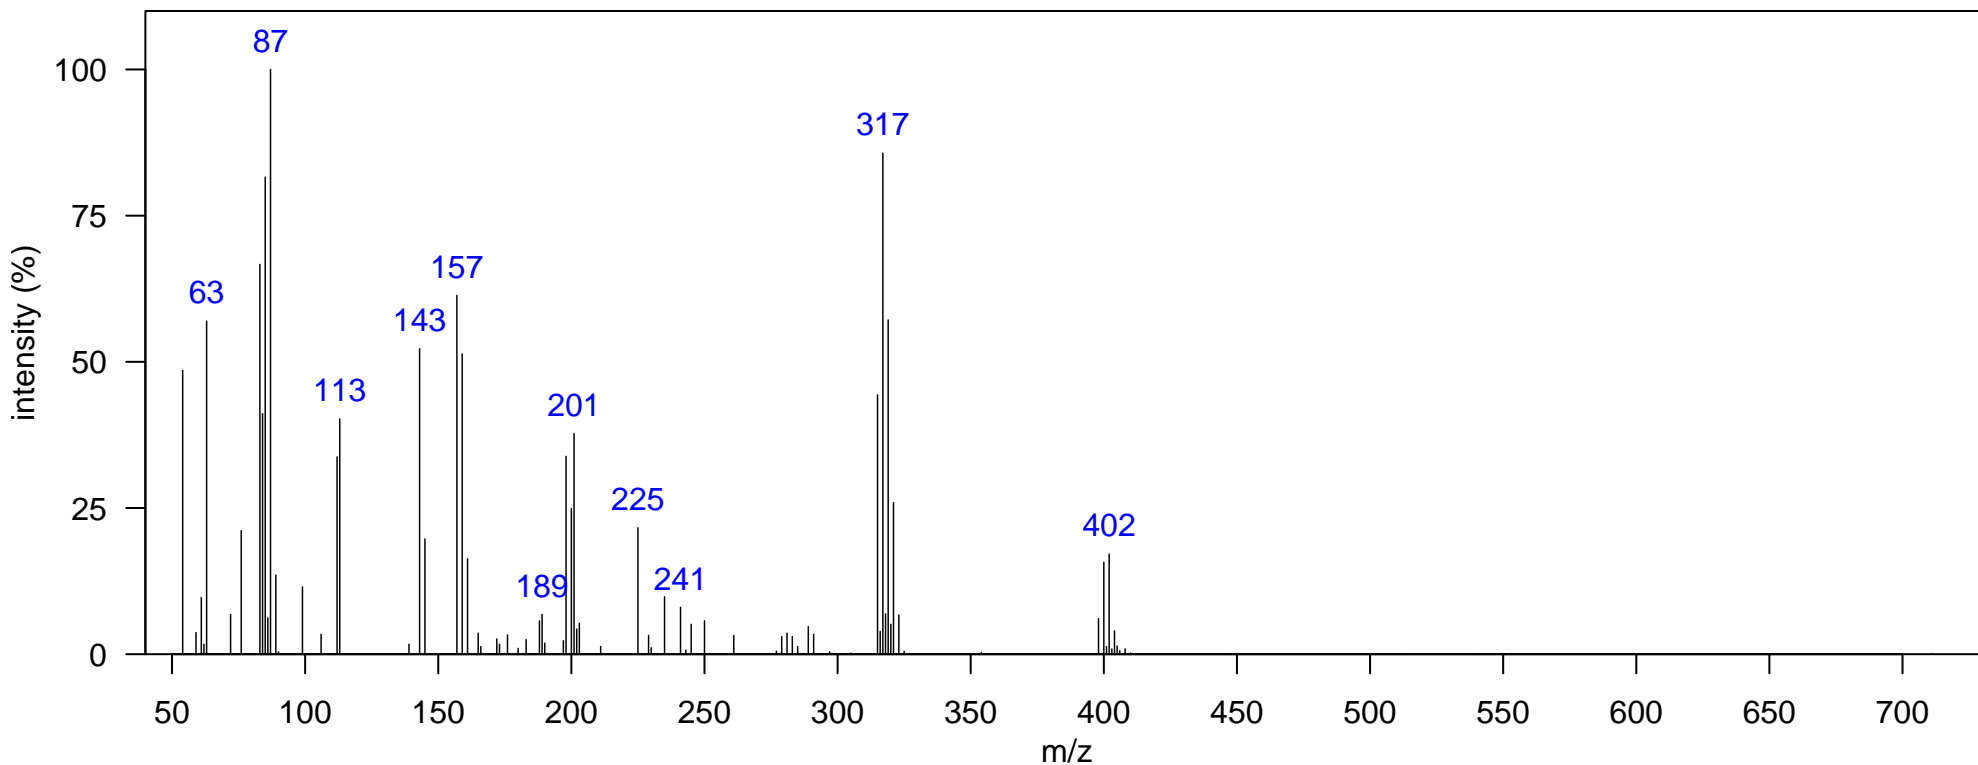

| m/z [Fragment] |
|----------------|
| 315 [M-CHCl2]+ |
| 398 [M-Cl8]+   |

Name: unknown-10

Class: Unknown

Matrix: South Atlantic Dolphin Blubber  
In N. Atlantic: FALSE, In N. Pacific: FALSE  
Typically Monitored: FALSE  
Comment:

Instrument: GCxGC-TOF, EI, 70 eV  
1D RT, 2D RT (s): 1306.6, 0.957  
Quantitative Ion m/z: 396

Elemental Formula:  
Source: unknown  
Identification: NA

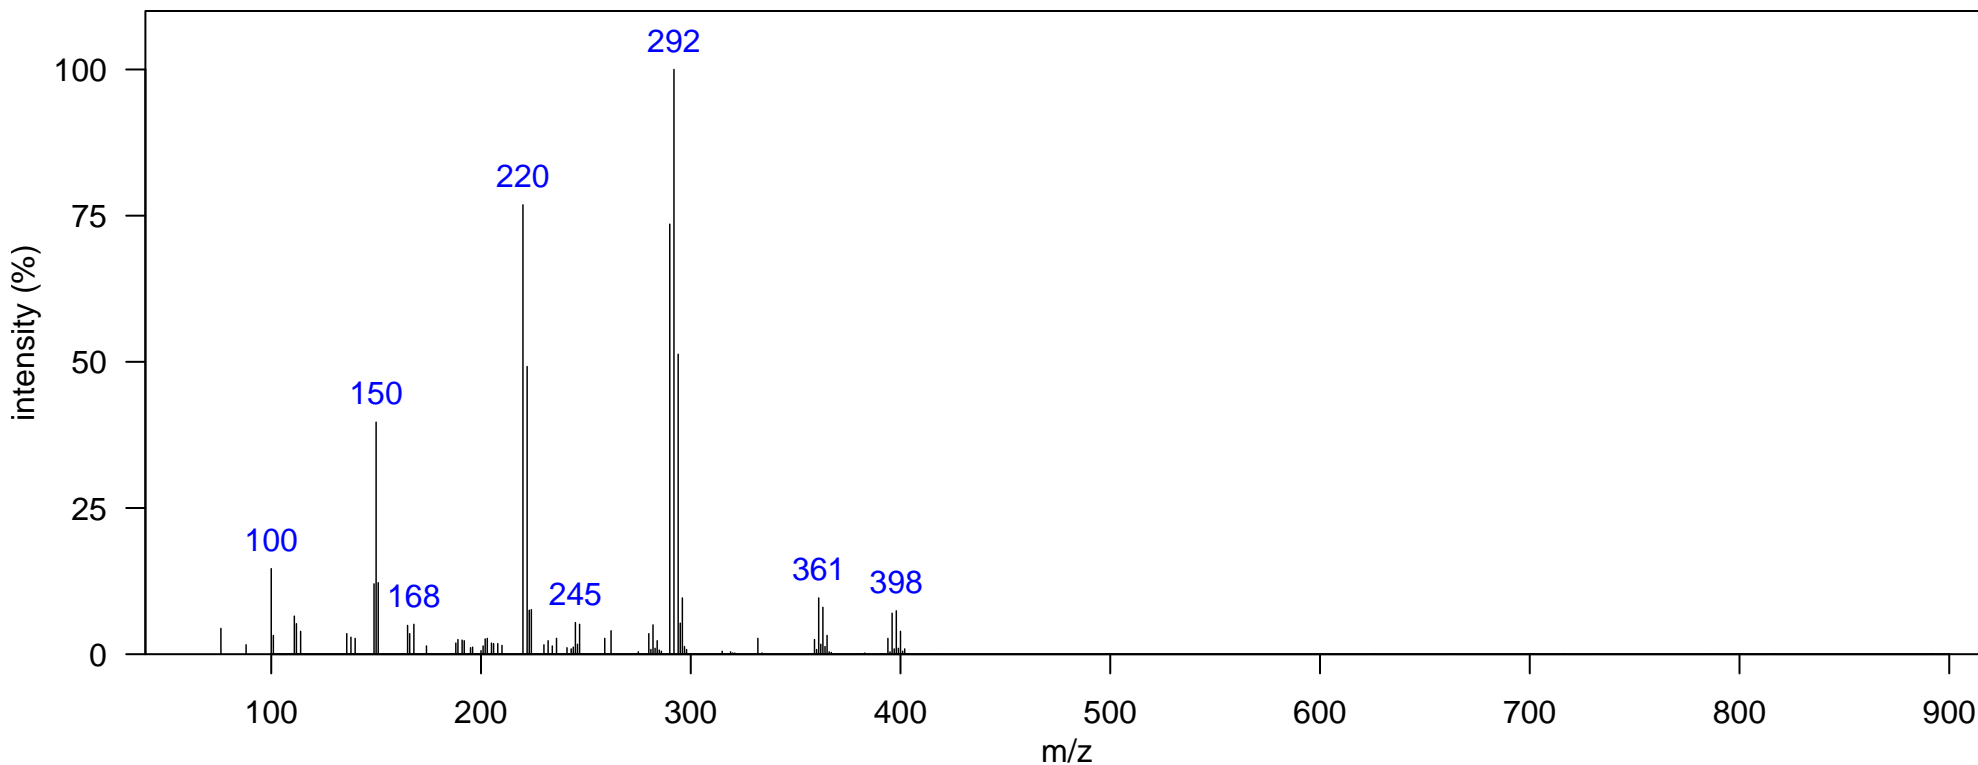

| m/z [Fragment]          |
|-------------------------|
| 100 PCB interference    |
| 150 PCB interference    |
| 220 PCB interference    |
| 292 PCB interference    |
| 359 [M-Cl] <sup>+</sup> |
| 394 [M] <sup>+</sup>    |

Name: unknown-11

Class: Unknown

Matrix: South Atlantic Dolphin Blubber  
In N. Atlantic: FALSE, In N. Pacific: FALSE  
Typically Monitored: FALSE  
Comment:

Instrument: GCxGC-TOF, EI, 70 eV  
1D RT, 2D RT (s): 1310.09, 1.01  
Quantitative Ion m/z: 276

Elemental Formula:  
Source: unknown  
Identification: NA

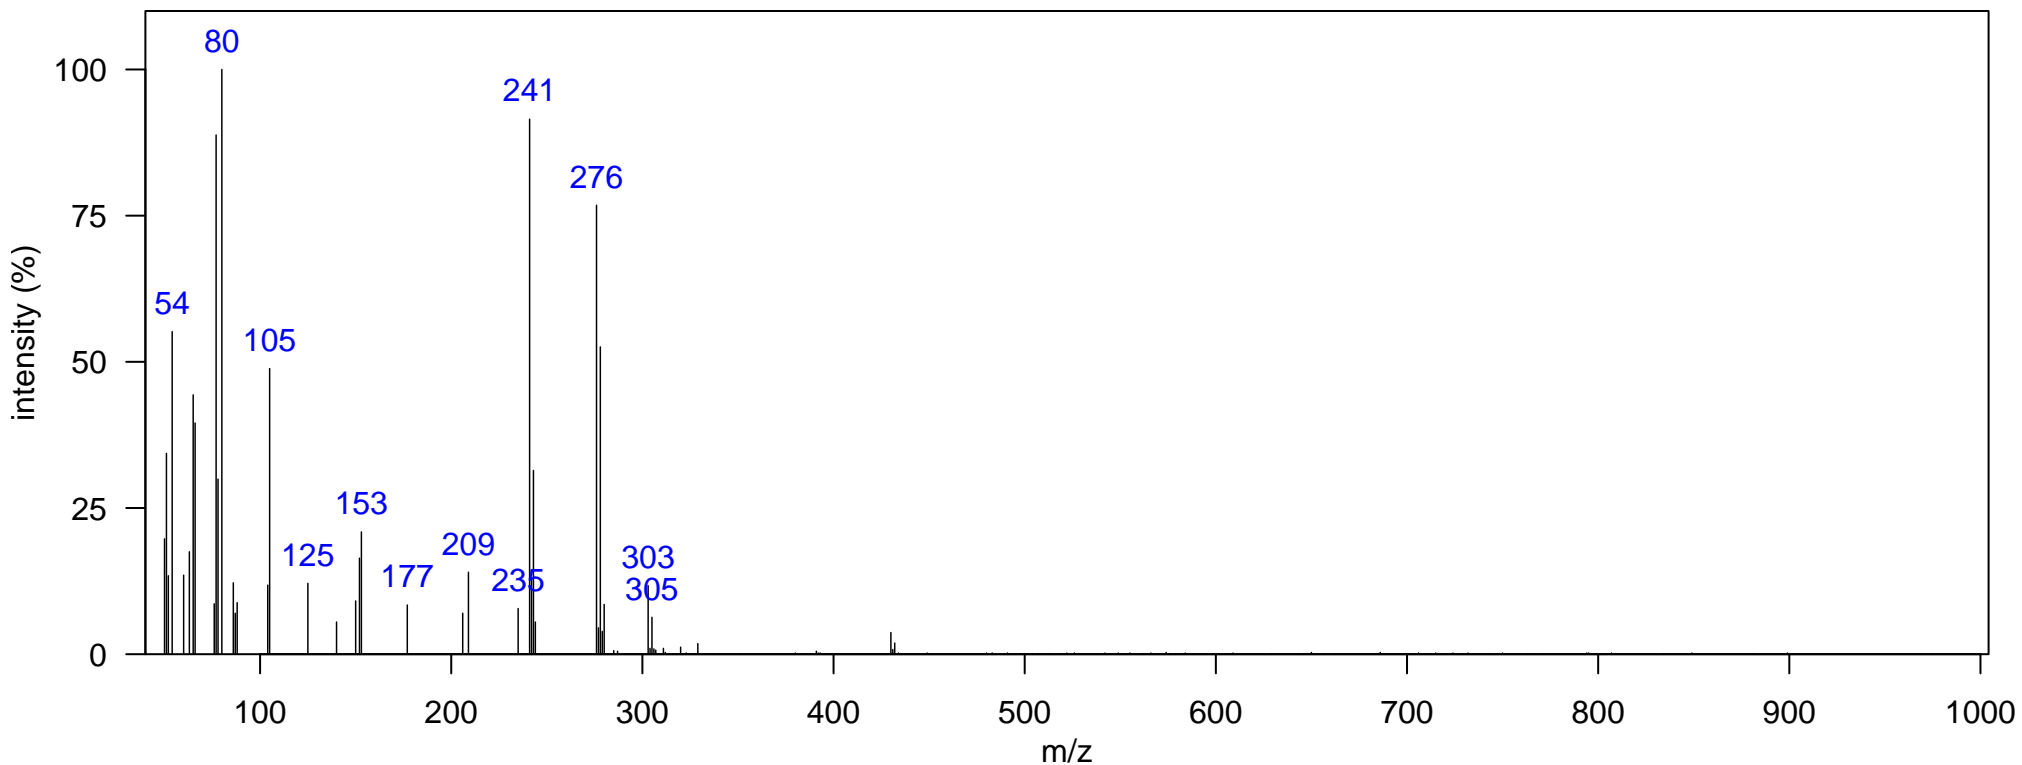

| m/z [Fragment] |
|----------------|
|----------------|

Name: unknown-12

Class: Unknown

Matrix: South Atlantic Dolphin Blubber  
In N. Atlantic: FALSE, In N. Pacific: TRUE  
Typically Monitored: FALSE  
Comment: unknown-17 (Pacific Library)

Instrument: GCxGC-TOF, EI, 70 eV  
1D RT, 2D RT (s): 1317.09, 0.95  
Quantitative Ion m/z: 369

Elemental Formula:  
Source: unknown  
Identification: NA

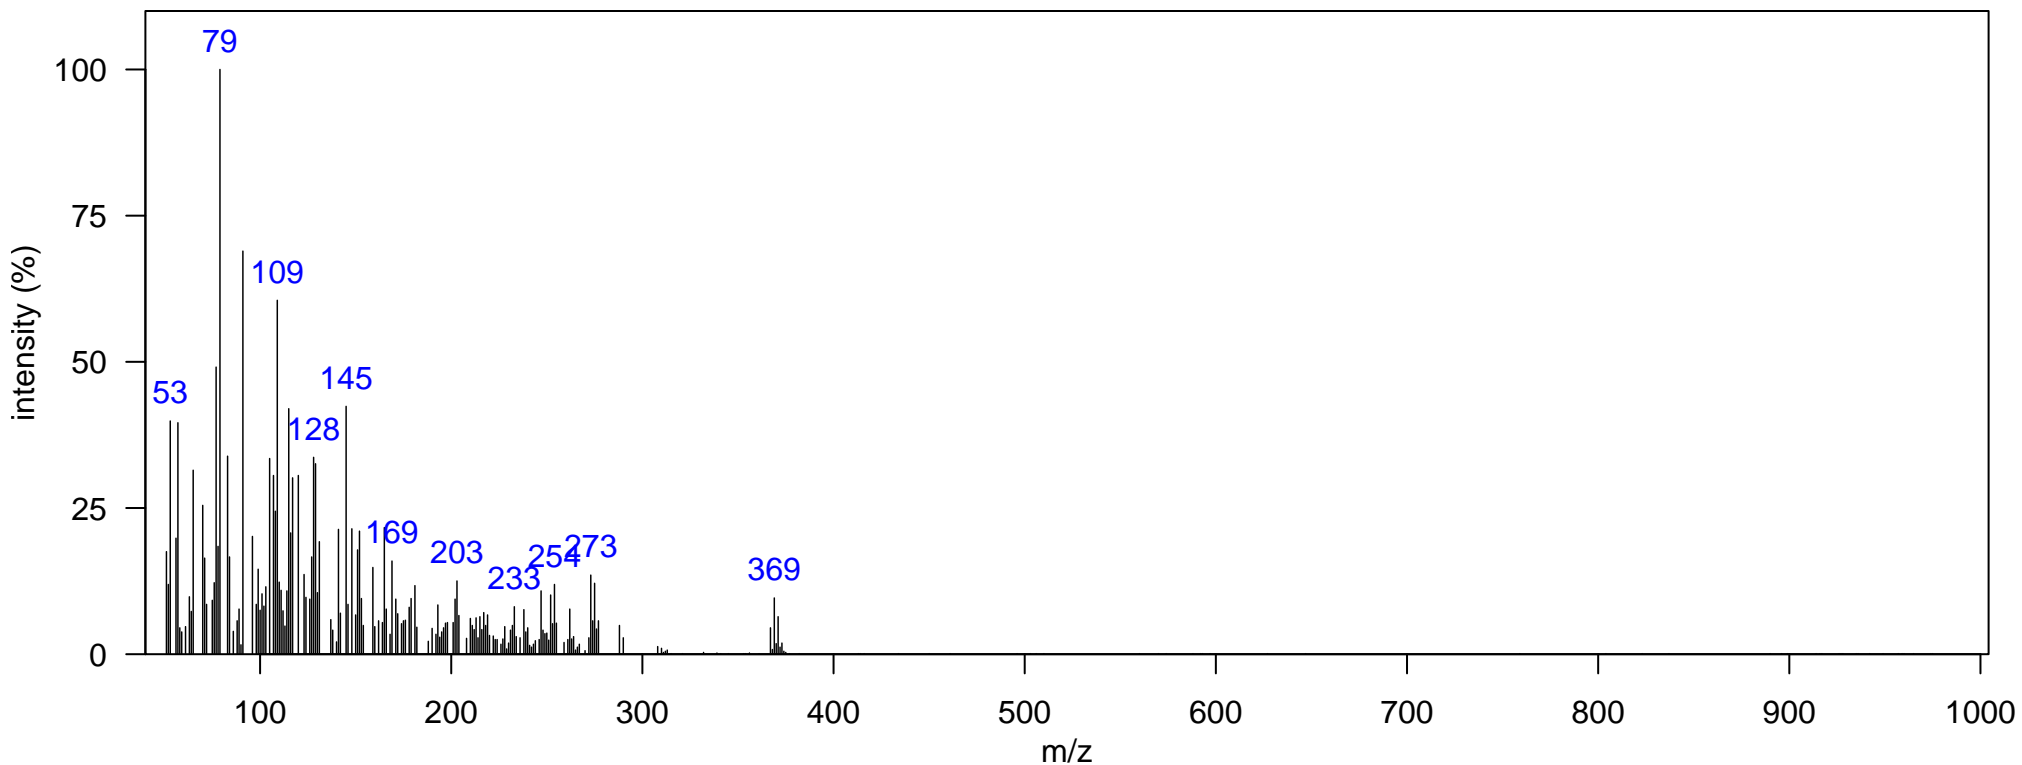

| m/z [Fragment] |
|----------------|
|----------------|

Name: unknown-13

Class: Unknown

Matrix: South Atlantic Dolphin Blubber  
In N. Atlantic: FALSE, In N. Pacific: FALSE  
Typically Monitored: FALSE  
Comment:

Instrument: GCxGC-TOF, EI, 70 eV  
1D RT, 2D RT (s): 1324.09, 1.142  
Quantitative Ion m/z: 201

Elemental Formula:  
Source: unknown  
Identification: NA

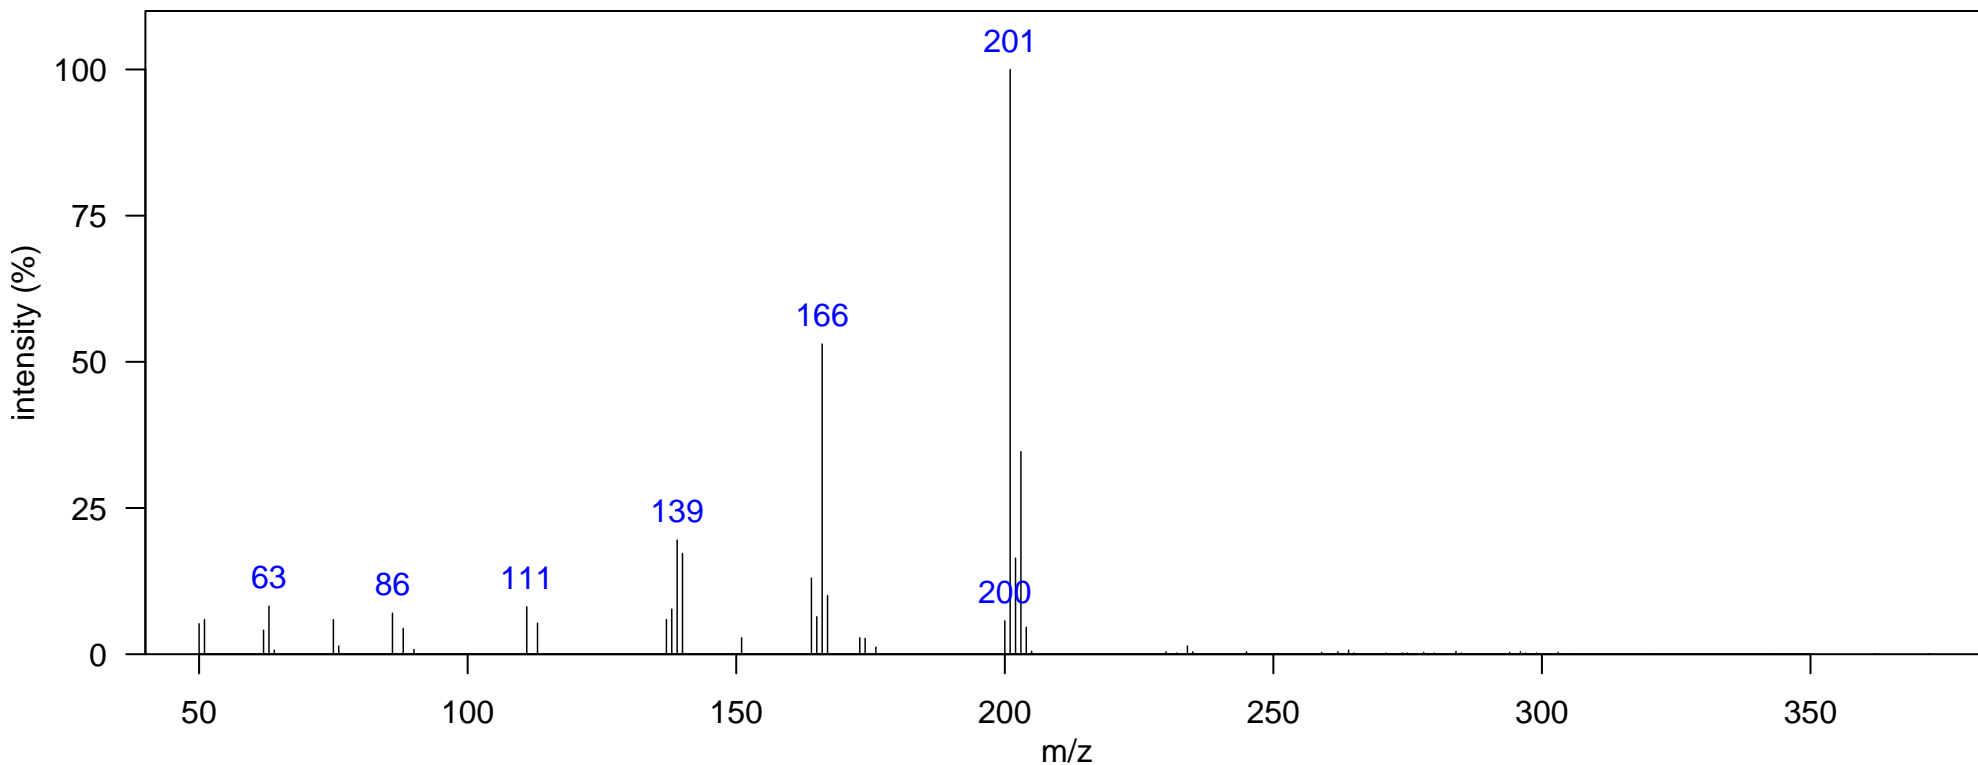

| m/z [Fragment] |
|----------------|
|----------------|

Name: unknown-14

Class: Unknown

Matrix: South Atlantic Dolphin Blubber

Instrument: GCxGC-TOF, EI, 70 eV

Elemental Formula:

In N. Atlantic: TRUE, In N. Pacific: FALSE

1D RT, 2D RT (s): 1348.57, 1.043

Source: unknown

Typically Monitored: FALSE

Quantitative Ion m/z: 432

Identification: NA

Comment: unknown-12 (N Atlantic Library); PM = Potential Molecular Ion; Frag = Fragment Ion

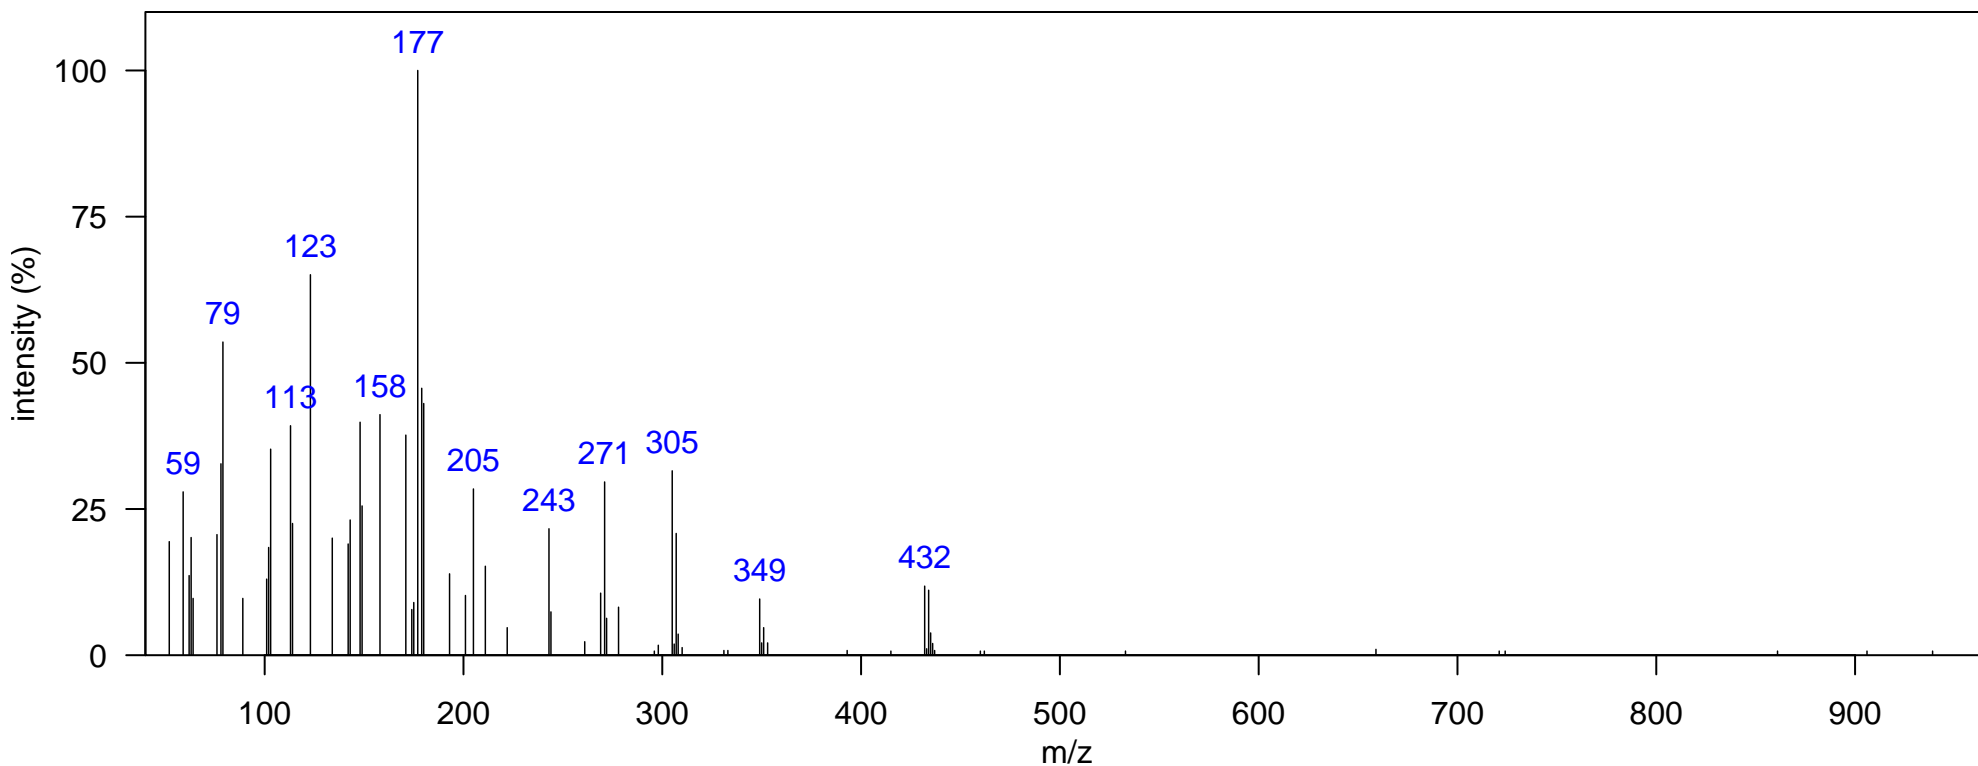

| m/z [Fragment]             |
|----------------------------|
| 177 [Frag]+ containing 2Cl |
| 305 [Frag]+ containing 2Cl |
| 349 [Frag]+ containing 2Cl |
| 432 [PM]+ containing 2Cl   |



Name: unknown-15

Class: Unknown

Matrix: South Atlantic Dolphin Blubber

Instrument: GCxGC-TOF, EI, 70 eV

Elemental Formula:

In N. Atlantic: TRUE, In N. Pacific: FALSE

1D RT, 2D RT (s): 1376.56, 0.931

Source: unknown

Typically Monitored: FALSE

Quantitative Ion m/z: 173

Identification: NA

Comment: unknown-3-2 (N Atlantic Library); PM = Possible Molecular Ion; Frag = Fragment Ion

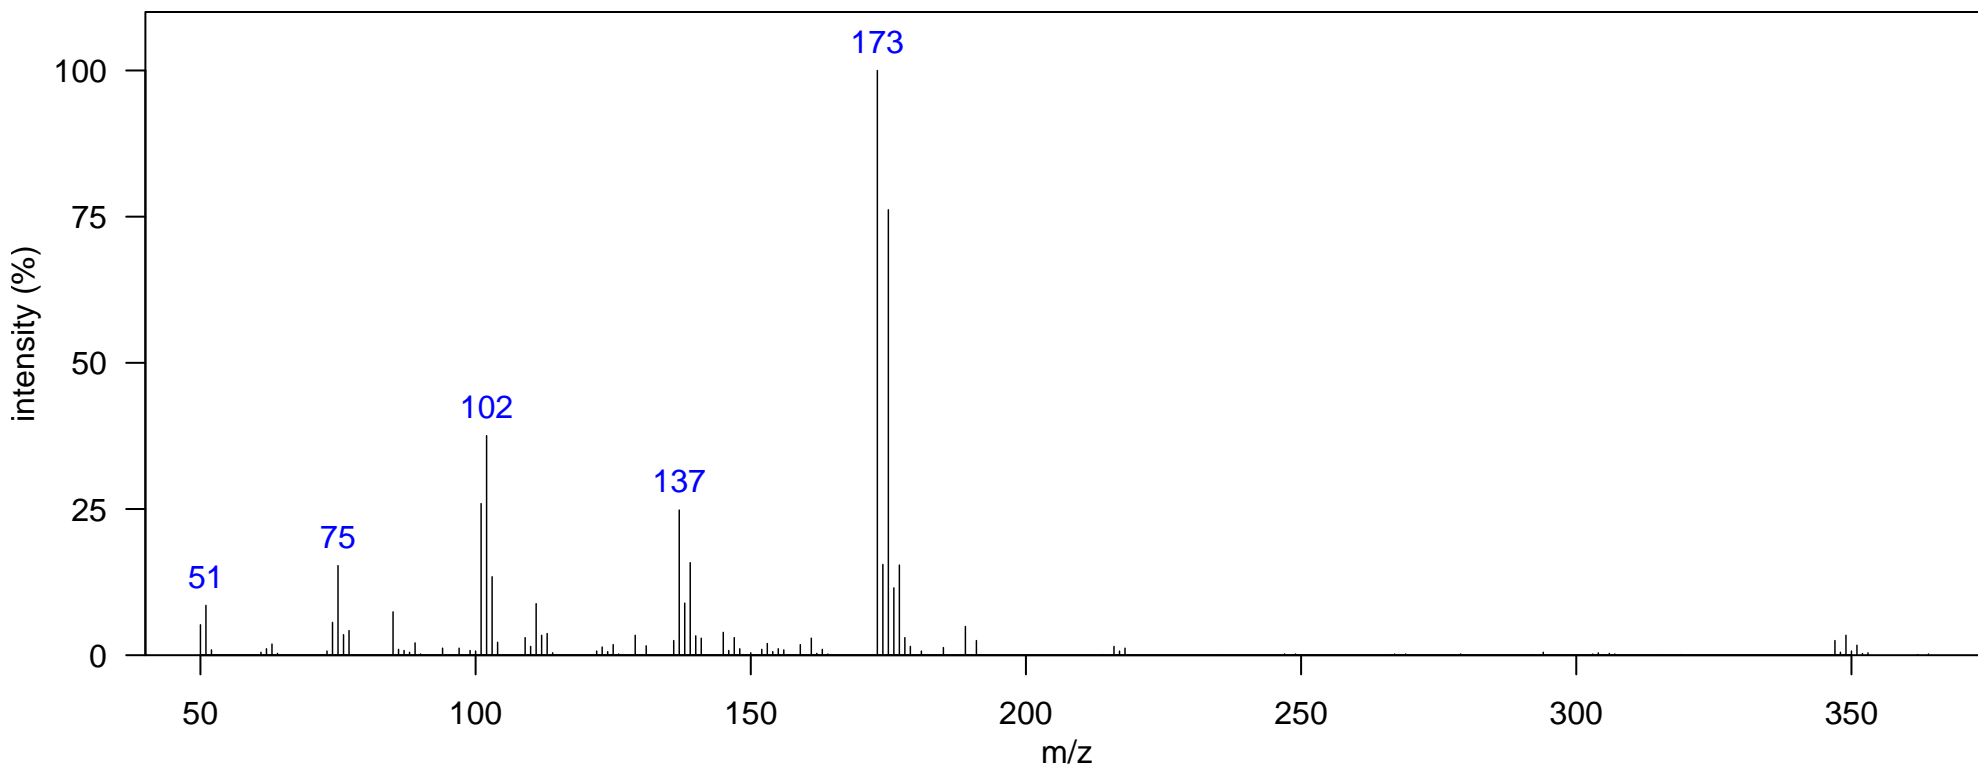

| m/z [Fragment]             |
|----------------------------|
| 137 [Frag-HCl]+            |
| 173 [Frag]+ containing 2Cl |
| 347 [PM]+ containing 4Cl   |

Name: unknown-16

Class: Unknown

Matrix: South Atlantic Dolphin Blubber  
In N. Atlantic: FALSE, In N. Pacific: FALSE  
Typically Monitored: FALSE  
Comment:

Instrument: GCxGC-TOF, EI, 70 eV  
1D RT, 2D RT (s): 1380.05, 0.997  
Quantitative Ion m/z: 413

Elemental Formula:  
Source: unknown  
Identification: NA

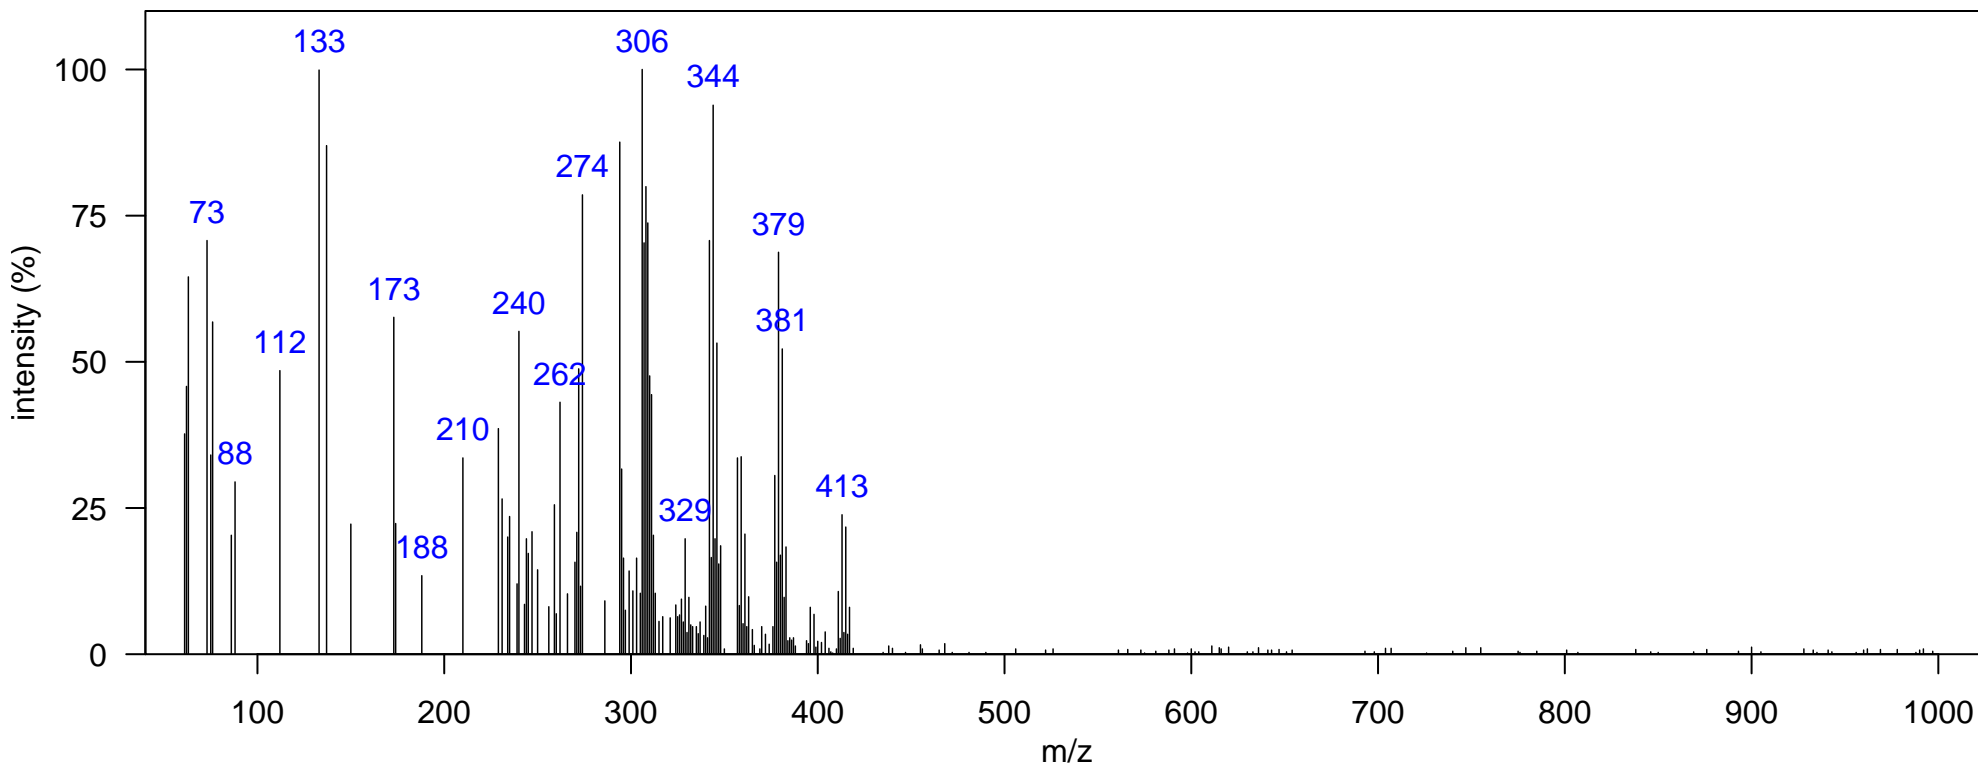

| m/z [Fragment] |
|----------------|
|----------------|

Name: unknown-17

Class: Unknown

Matrix: South Atlantic Dolphin Blubber  
In N. Atlantic: FALSE, In N. Pacific: FALSE  
Typically Monitored: FALSE  
Comment:

Instrument: GCxGC-TOF, EI, 70 eV  
1D RT, 2D RT (s): 1390.55, 0.99  
Quantitative Ion m/z: 316

Elemental Formula:  
Source: unknown  
Identification: NA

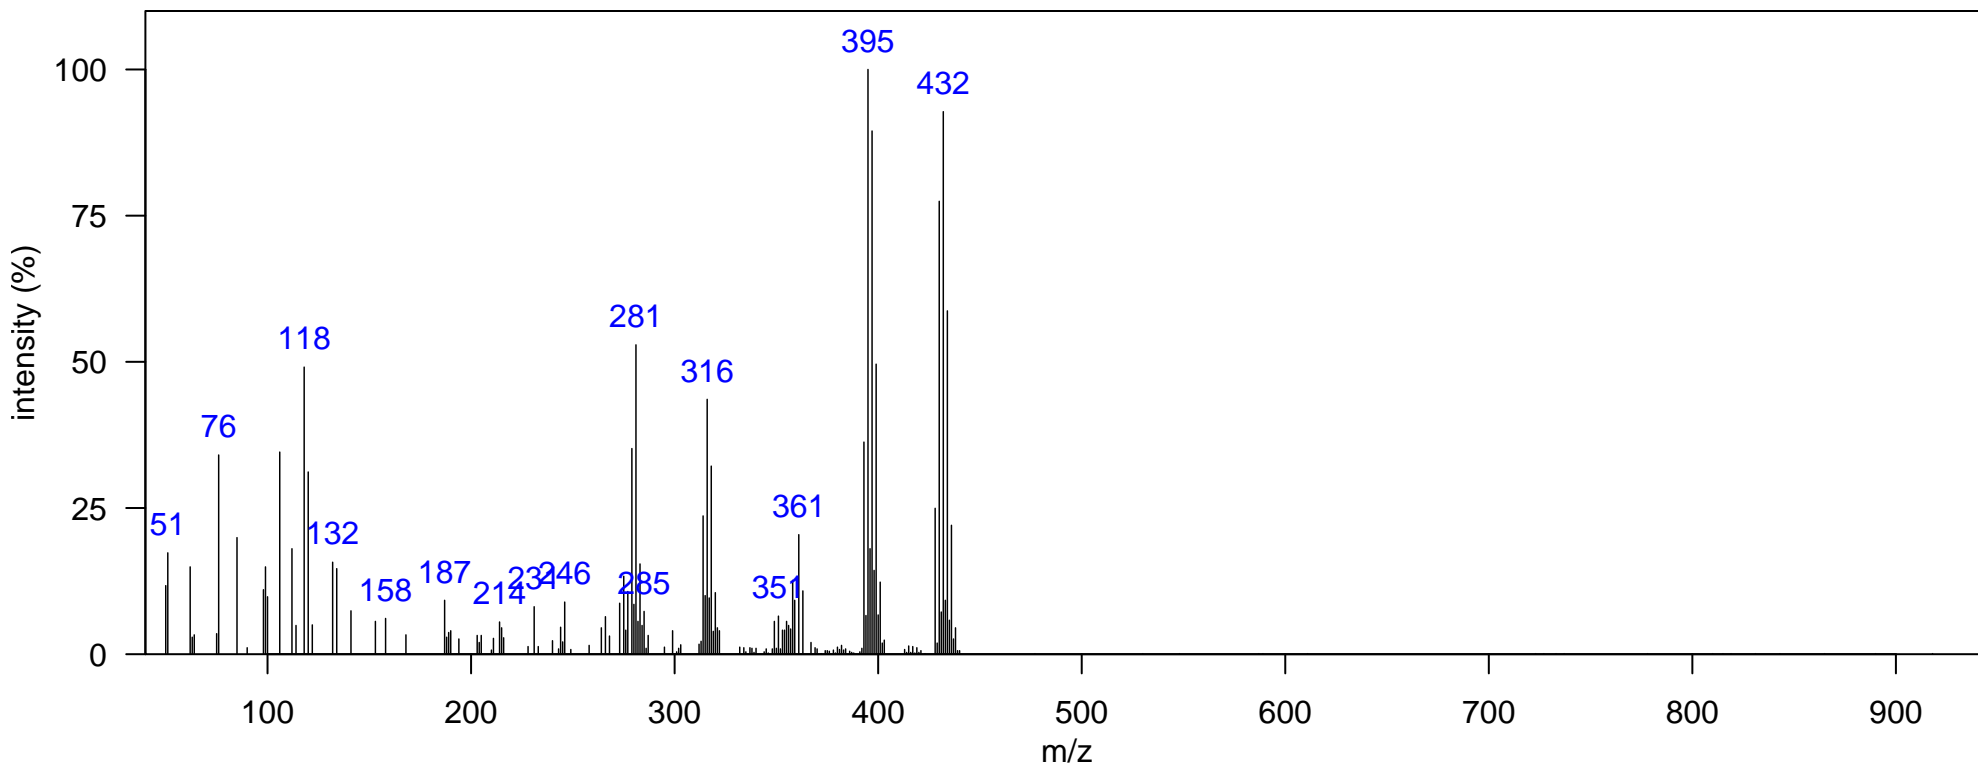

| m/z [Fragment]       |
|----------------------|
| 395 PCB interference |
| 432 PCB interference |

Name: unknown-18

Class: Unknown

Matrix: South Atlantic Dolphin Blubber  
In N. Atlantic: FALSE, In N. Pacific: FALSE  
Typically Monitored: FALSE  
Comment:

Instrument: GCxGC-TOF, EI, 70 eV  
1D RT, 2D RT (s): 1394.05, 1.023  
Quantitative Ion m/z: 388

Elemental Formula:  
Source: unknown  
Identification: NA

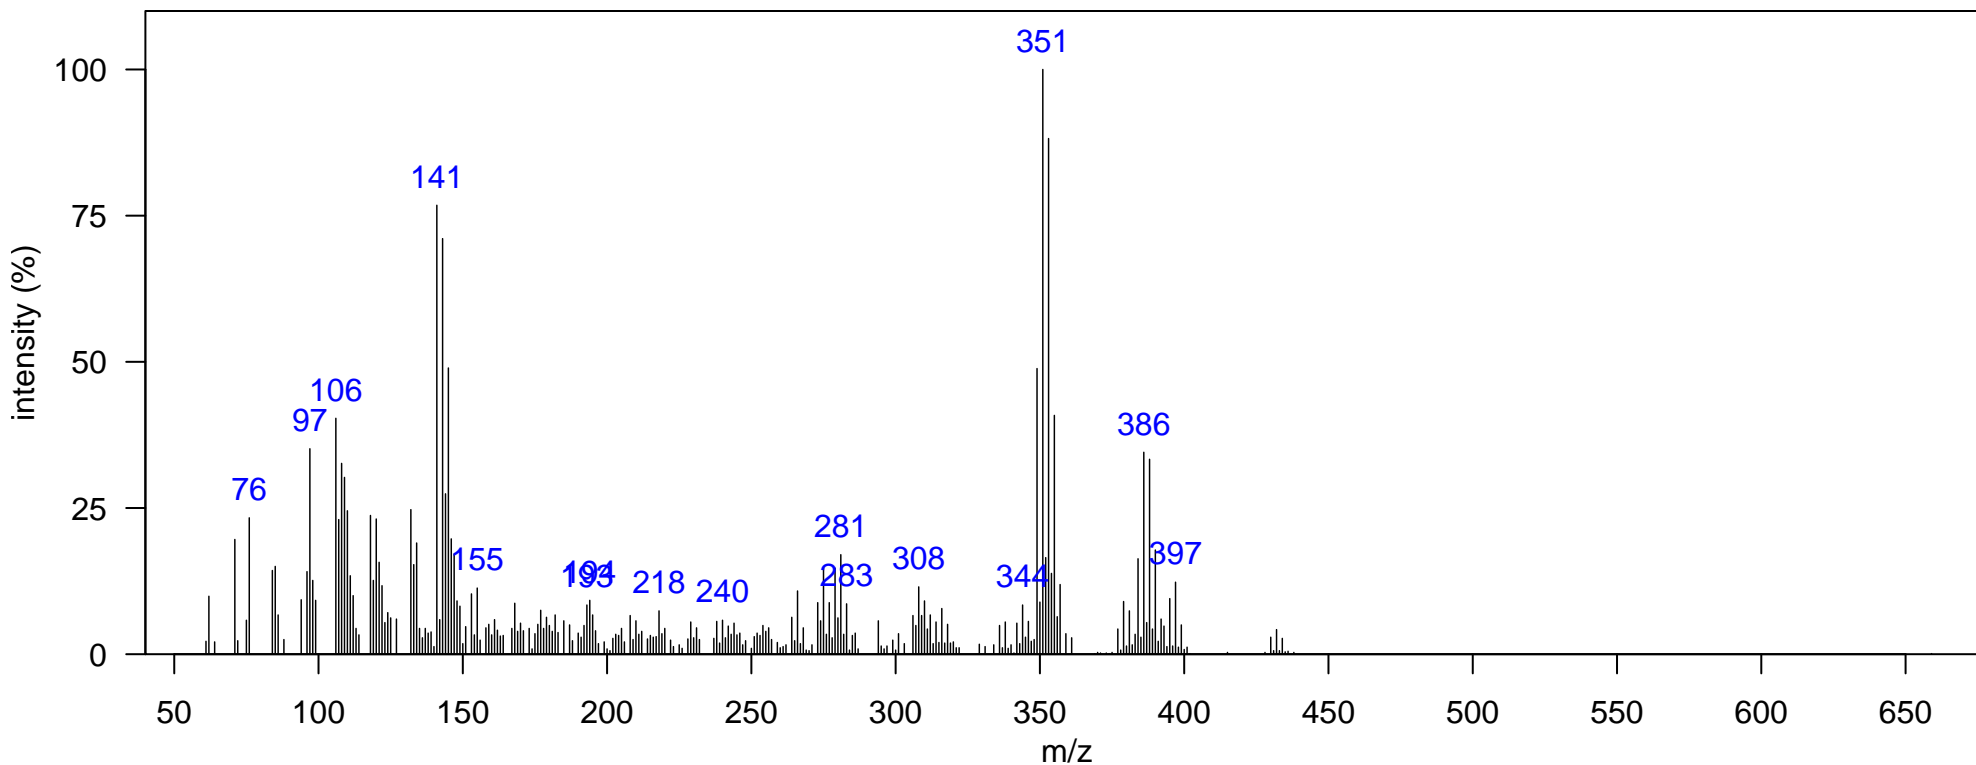

| m/z [Fragment]          |
|-------------------------|
| 349 [M-Cl] <sup>+</sup> |
| 384 [M] <sup>+</sup> ;  |

Name: unknown-19

Class: Unknown

Matrix: South Atlantic Dolphin Blubber  
In N. Atlantic: FALSE, In N. Pacific: FALSE  
Typically Monitored: FALSE  
Comment:

Instrument: GCxGC-TOF, EI, 70 eV  
1D RT, 2D RT (s): 1397.54, 1.003  
Quantitative Ion m/z: 316

Elemental Formula:  
Source: unknown  
Identification: NA

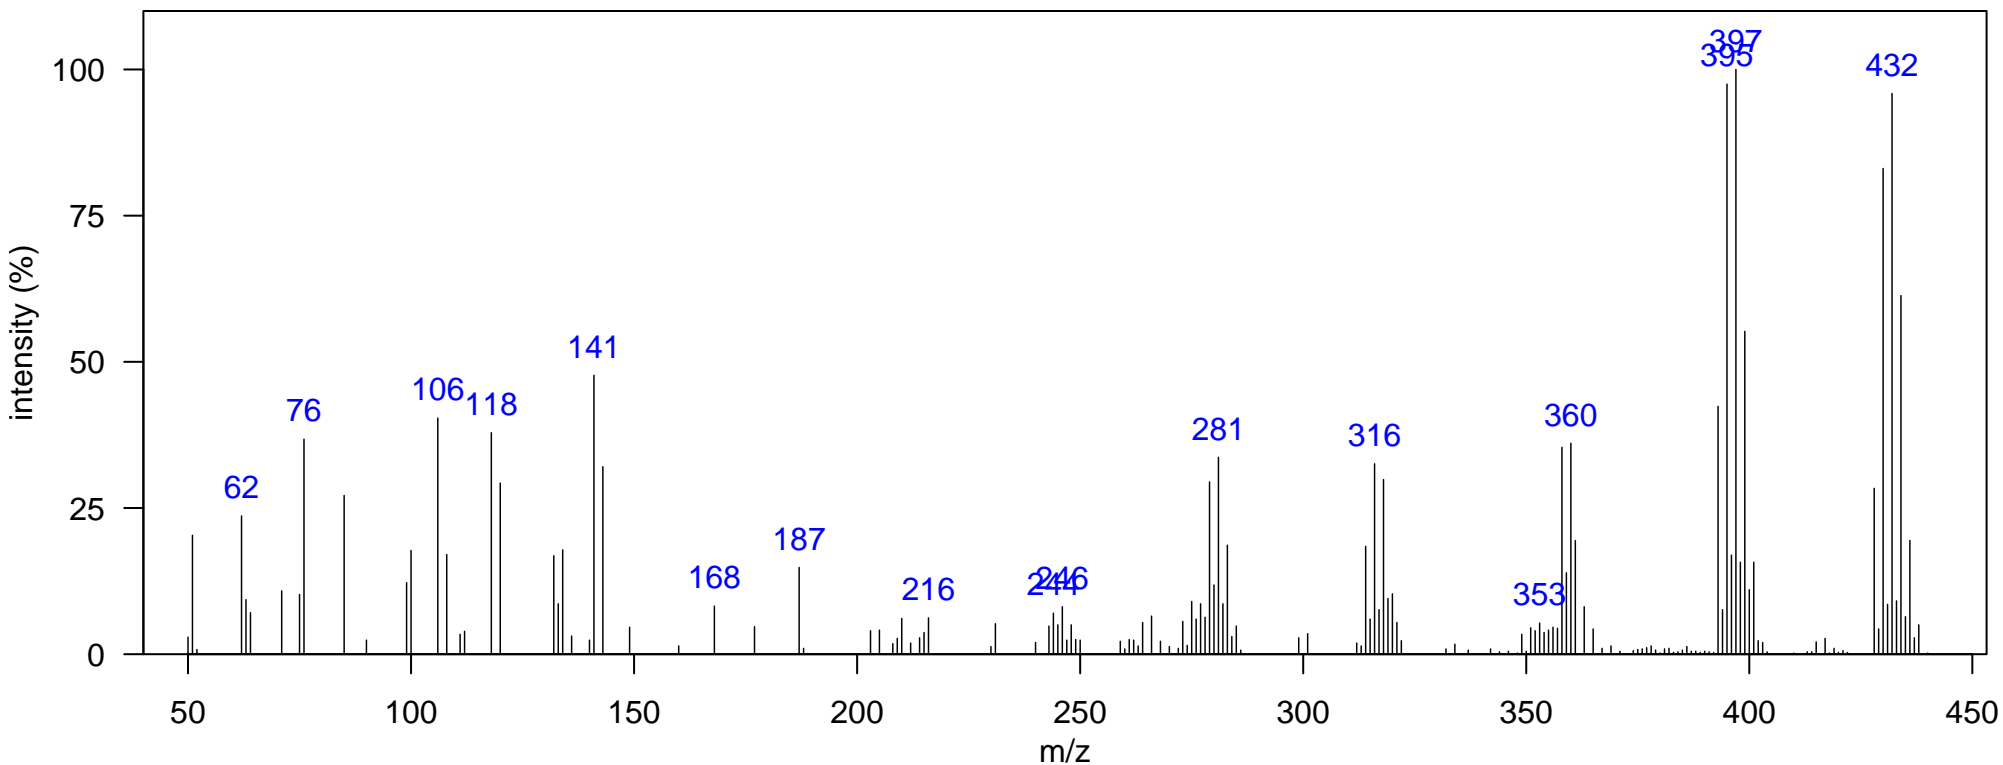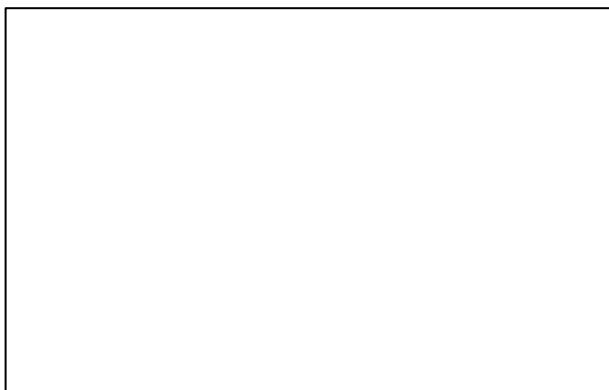

| m/z [Fragment]       |
|----------------------|
| 360 PCB interference |
| 395 PCB interference |
| 432 PCB interference |

Name: unknown-20

Class: Unknown

Matrix: South Atlantic Dolphin Blubber  
In N. Atlantic: FALSE, In N. Pacific: FALSE  
Typically Monitored: FALSE  
Comment:

Instrument: GCxGC-TOF, EI, 70 eV  
1D RT, 2D RT (s): 1436.02, 1.036  
Quantitative Ion m/z: 403

Elemental Formula:  
Source: unknown  
Identification: NA

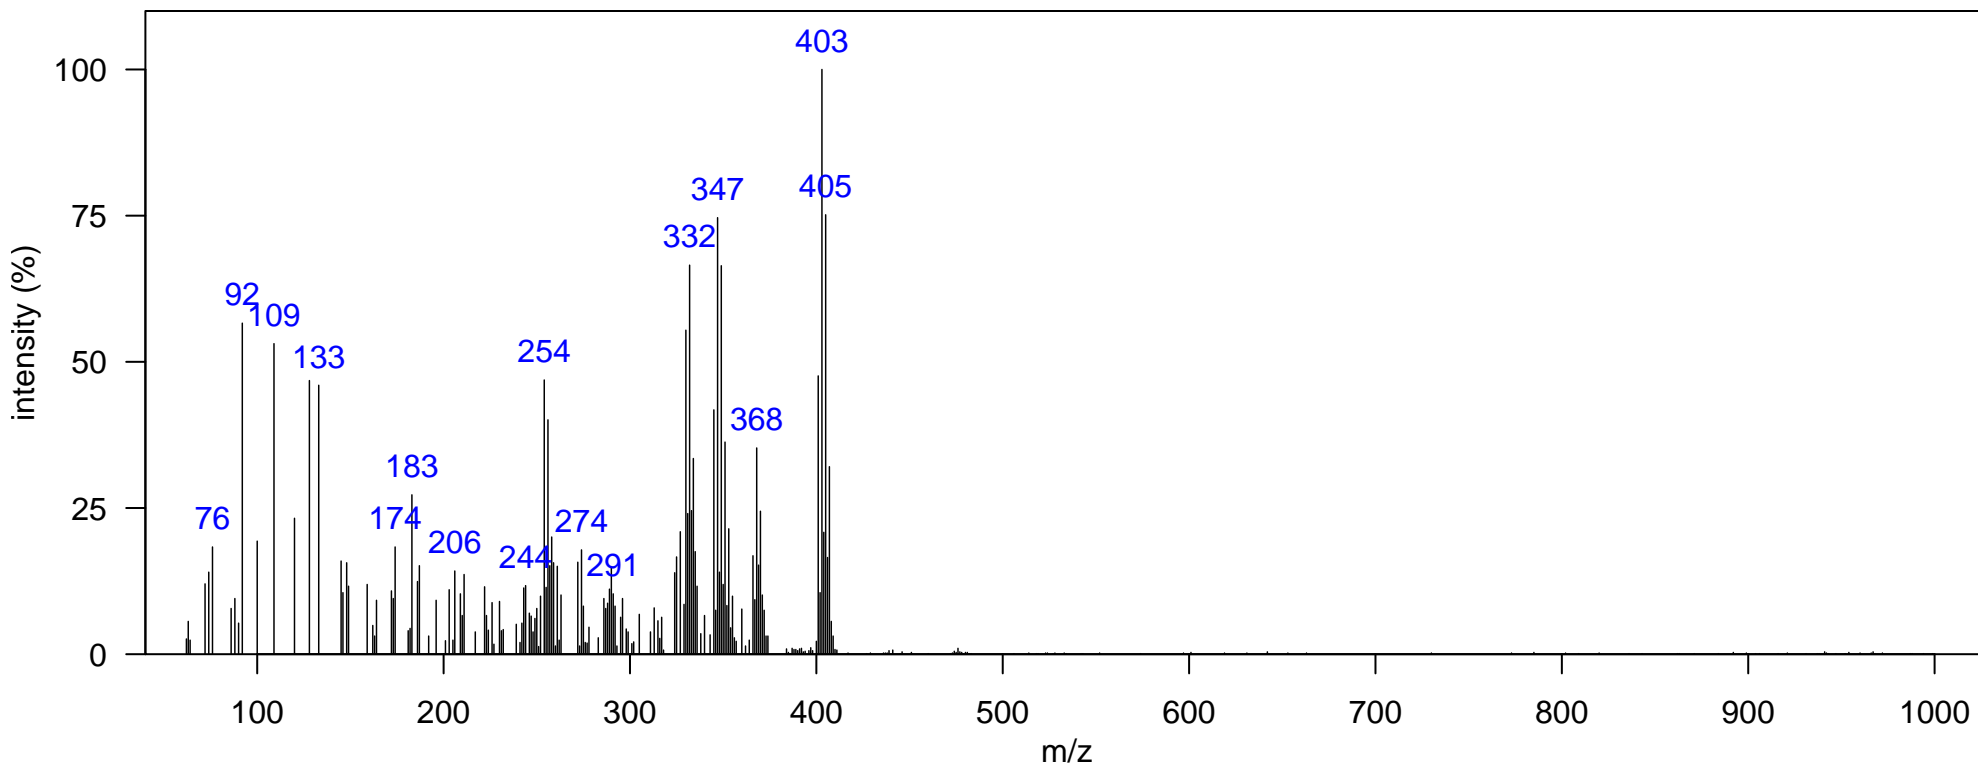

| m/z [Fragment] |
|----------------|
|----------------|

Name: unknown-21

Class: Unknown

Matrix: South Atlantic Dolphin Blubber  
In N. Atlantic: FALSE, In N. Pacific: TRUE  
Typically Monitored: FALSE  
Comment: unknown-22 (Pacific Library)

Instrument: GCxGC-TOF, EI, 70 eV  
1D RT, 2D RT (s): 1467.5, 1.063  
Quantitative Ion m/z: 342

Elemental Formula:  
Source: unknown  
Identification: NA

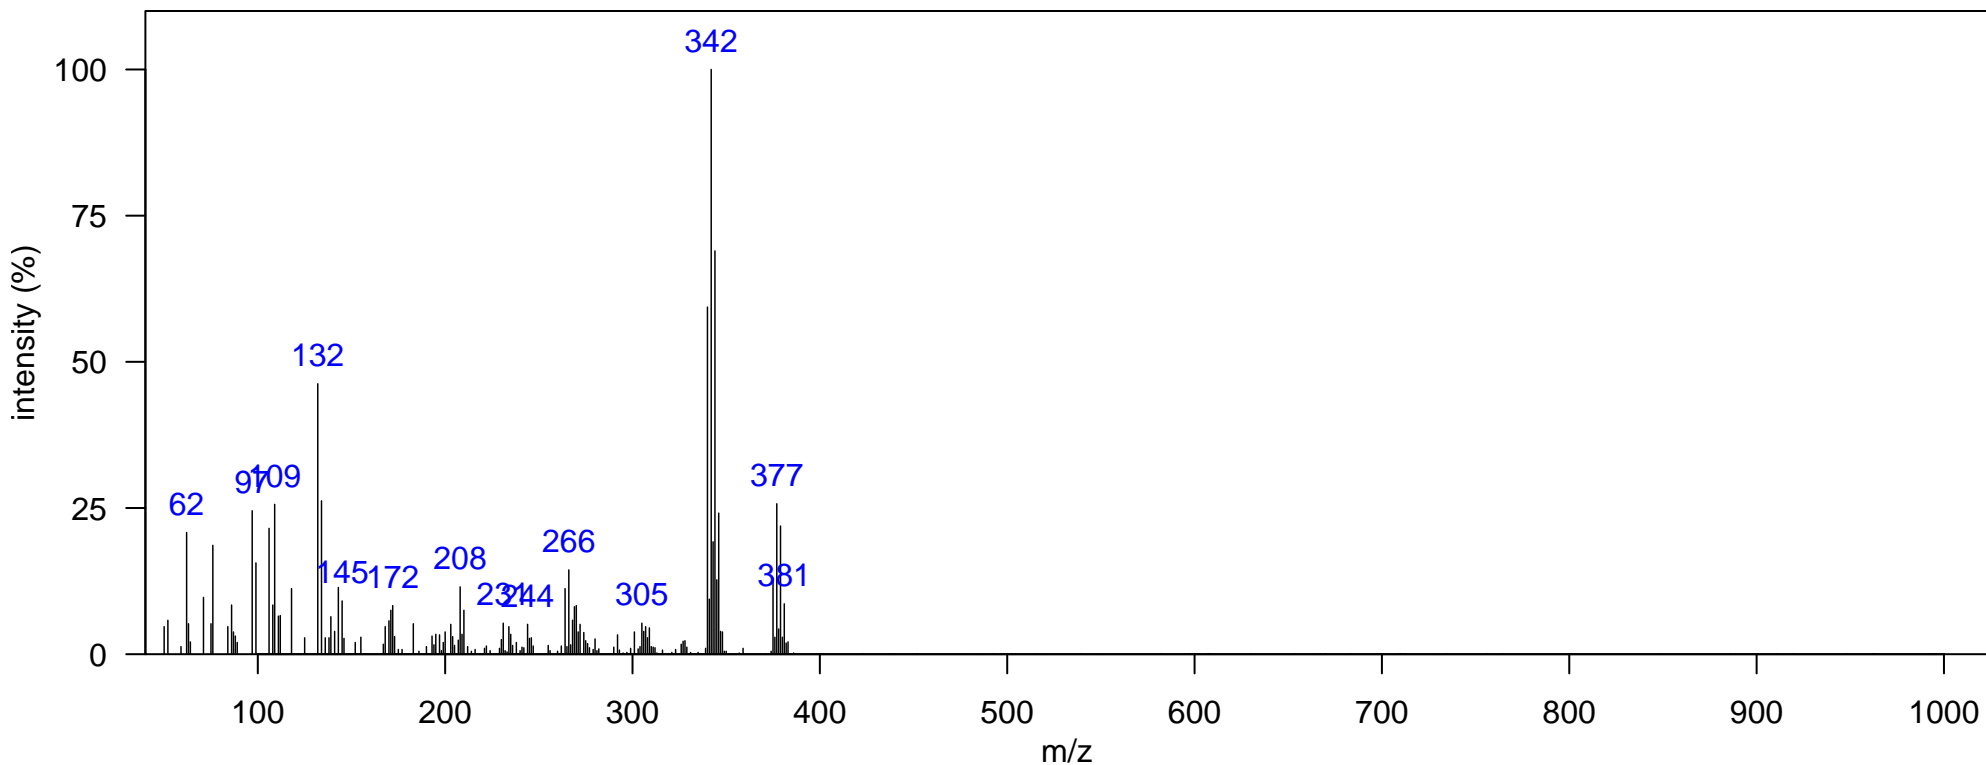

| m/z [Fragment] |
|----------------|
|----------------|

Name: unknown-22

Class: Unknown

Matrix: South Atlantic Dolphin Blubber  
In N. Atlantic: FALSE, In N. Pacific: FALSE  
Typically Monitored: FALSE  
Comment:

Instrument: GCxGC-TOF, EI, 70 eV  
1D RT, 2D RT (s): 1481.5, 1.082  
Quantitative Ion m/z: 413

Elemental Formula:  
Source: unknown  
Identification: NA

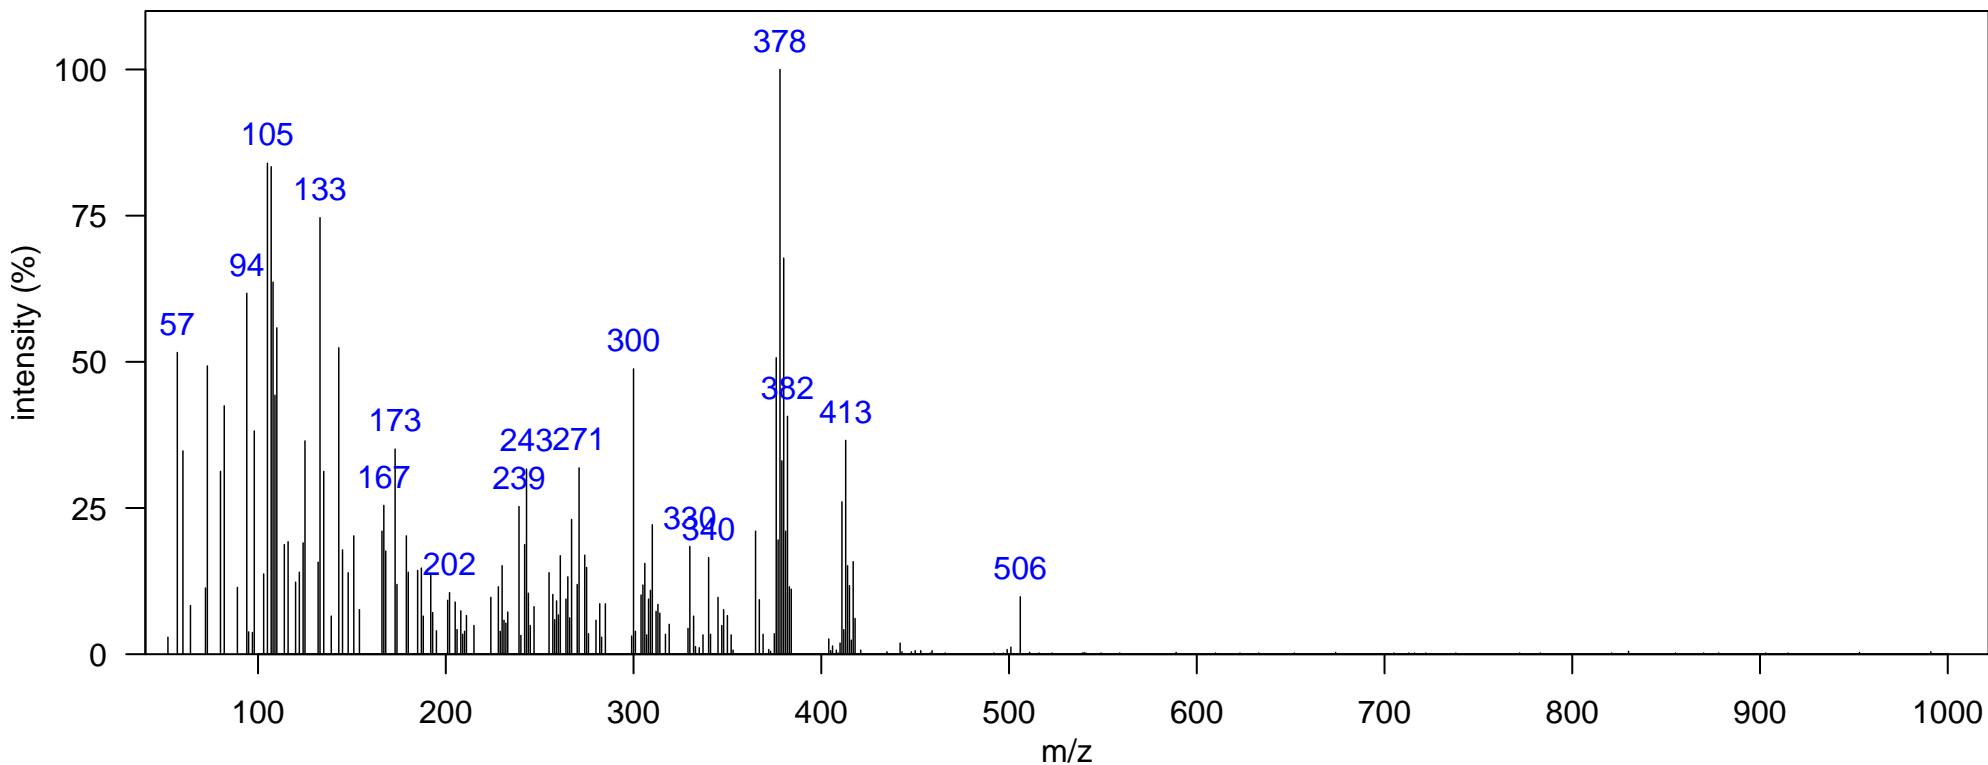

| m/z [Fragment] |
|----------------|
|                |



Name: unknown-23

Class: Unknown

Matrix: South Atlantic Dolphin Blubber  
In N. Atlantic: FALSE, In N. Pacific: FALSE  
Typically Monitored: FALSE  
Comment:

Instrument: GCxGC-TOF, EI, 70 eV  
1D RT, 2D RT (s): 1481.5, 1.023  
Quantitative Ion m/z: 372

Elemental Formula:  
Source: unknown  
Identification: NA

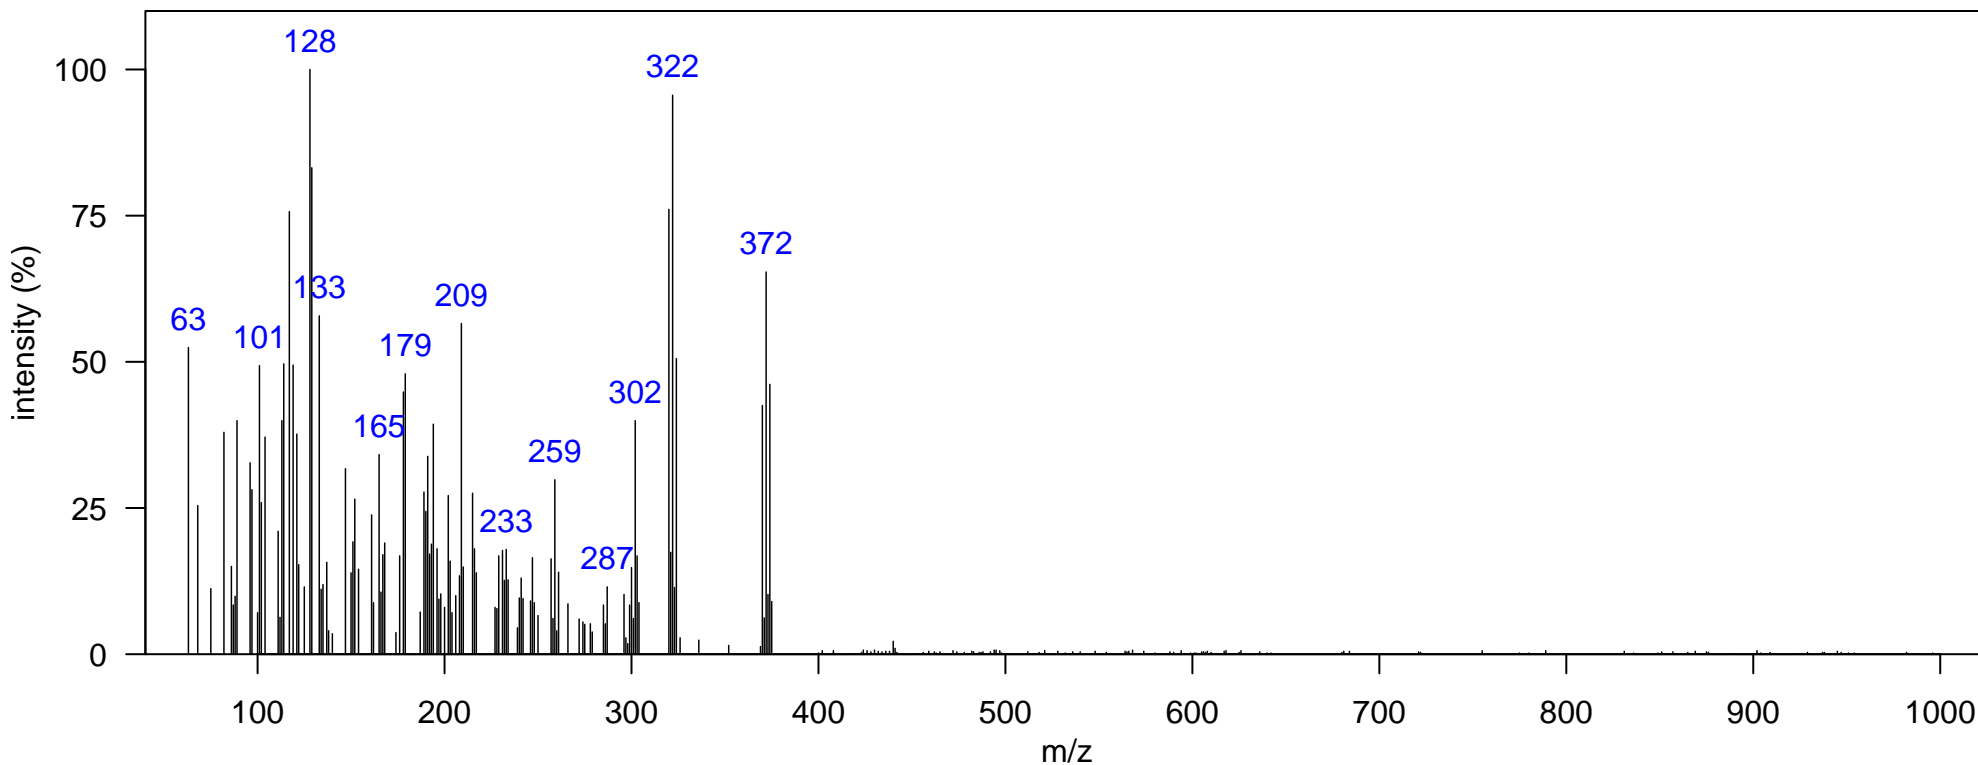

| m/z [Fragment] |
|----------------|
|----------------|

Name: unknown-24

Class: Unknown

Matrix: South Atlantic Dolphin Blubber  
In N. Atlantic: FALSE, In N. Pacific: FALSE  
Typically Monitored: FALSE  
Comment:

Instrument: GCxGC-TOF, EI, 70 eV  
1D RT, 2D RT (s): 1526.97, 1.175  
Quantitative Ion m/z: 493

Elemental Formula:  
Source: unknown  
Identification: NA

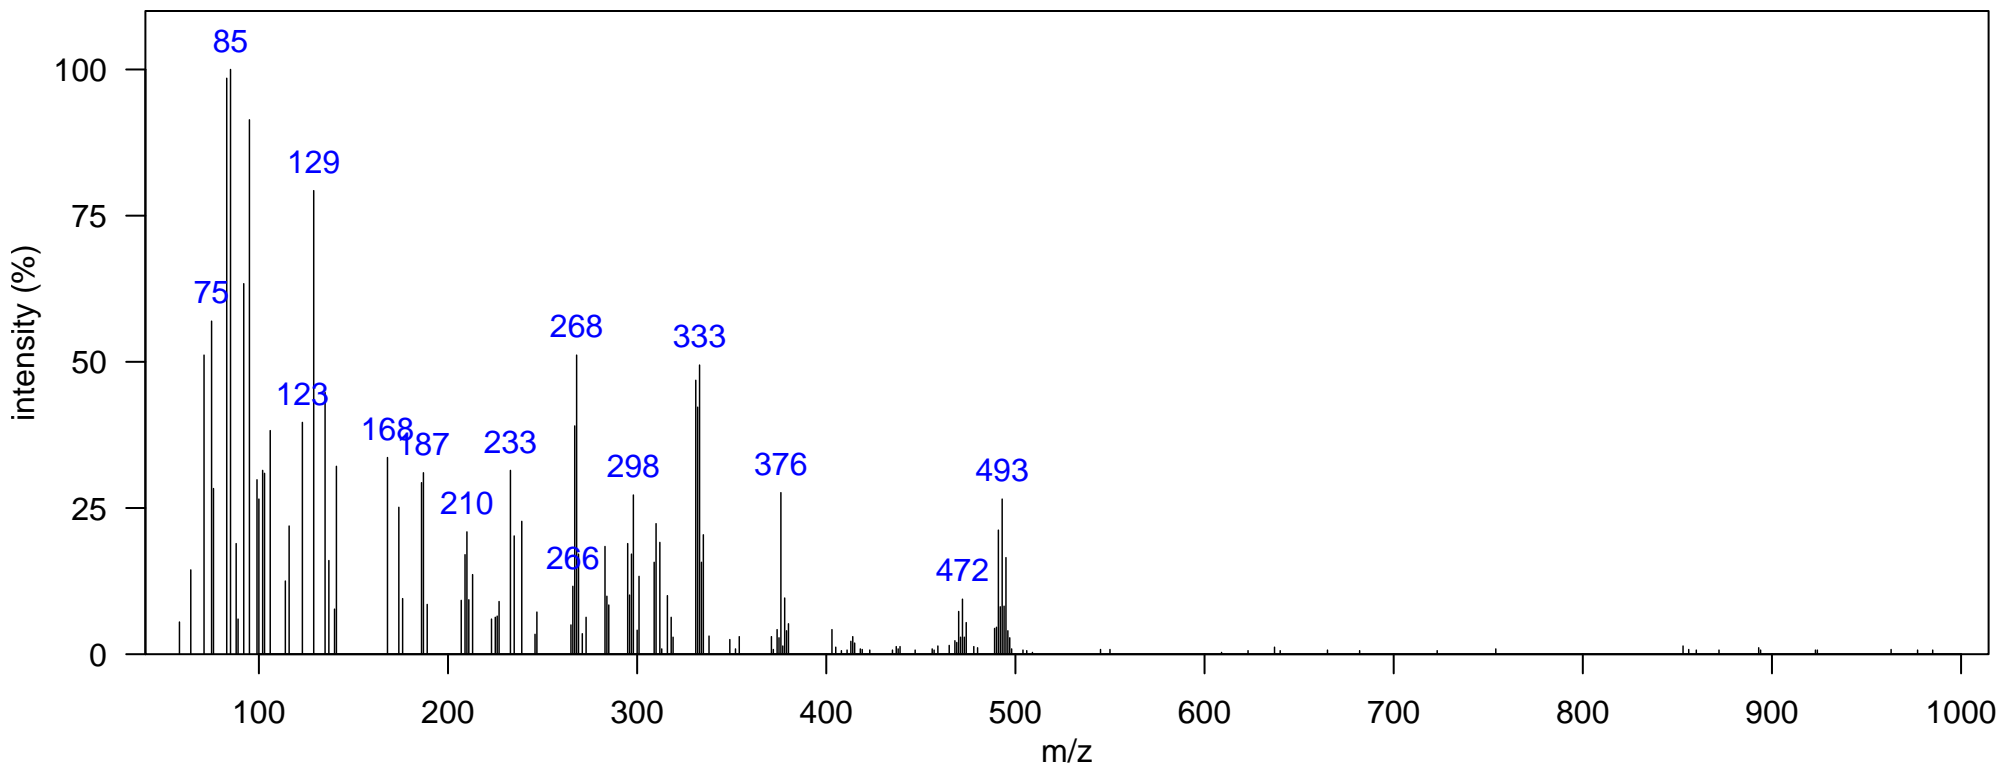

| m/z [Fragment] |
|----------------|
|----------------|

Name: unknown-25

Class: Unknown

Matrix: South Atlantic Dolphin Blubber  
In N. Atlantic: FALSE, In N. Pacific: FALSE  
Typically Monitored: FALSE  
Comment:

Instrument: GCxGC-TOF, EI, 70 eV  
1D RT, 2D RT (s): 1533.97, 1.155  
Quantitative Ion m/z: 493

Elemental Formula:  
Source: unknown  
Identification: NA

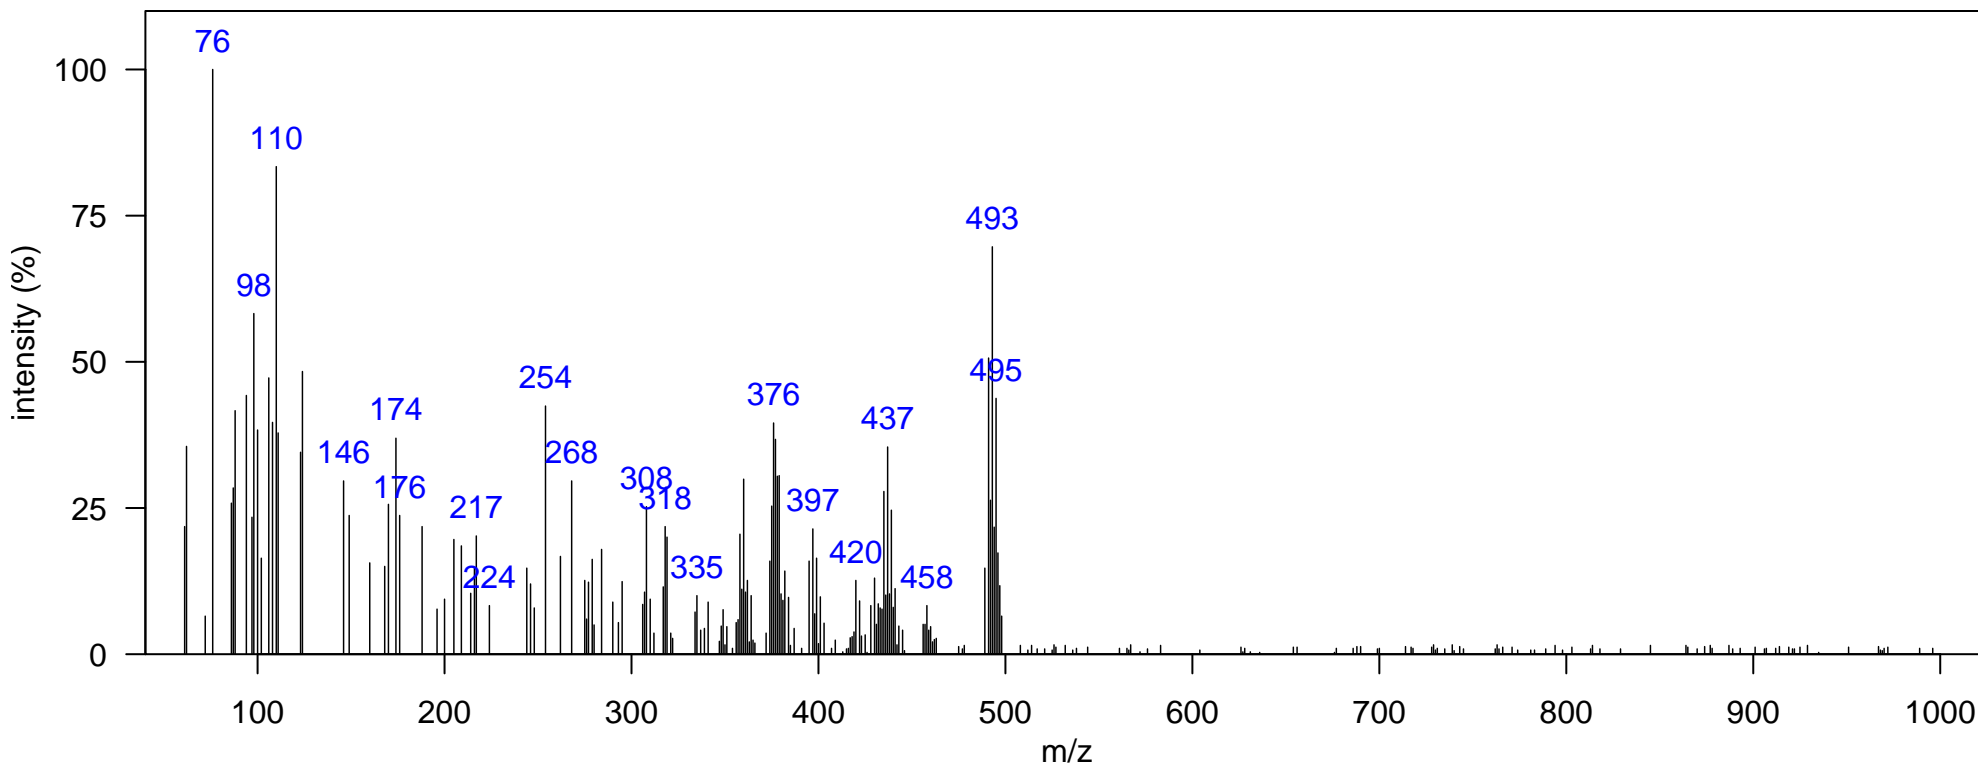

| m/z [Fragment] |
|----------------|
|----------------|

Name: unknown-26

Class: Unknown

Matrix: South Atlantic Dolphin Blubber

Instrument: GCxGC-TOF, EI, 70 eV

Elemental Formula:

In N. Atlantic: FALSE, In N. Pacific: FALSE

1D RT, 2D RT (s): 1568.95, 1.34

Source: unknown

Typically Monitored: FALSE

Quantitative Ion m/z: 336

Identification: NA

Comment: Similar to unknown-29 but different retention time (Pacific Library)

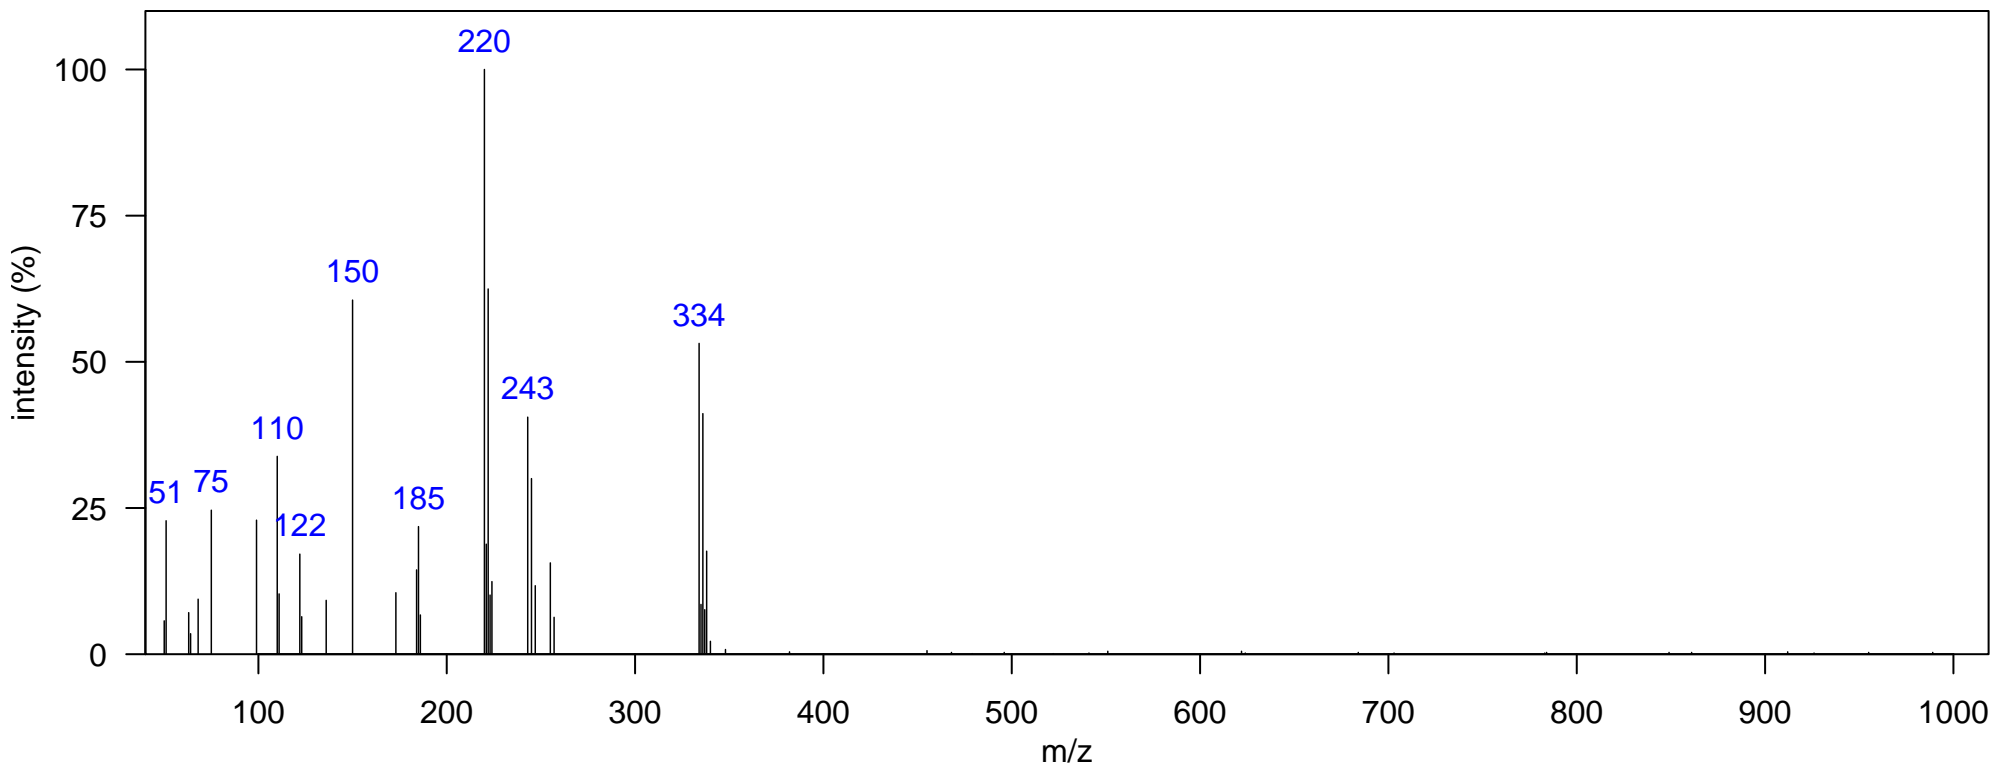

| m/z [Fragment] |
|----------------|
|----------------|

Name: unknown-27

Class: Unknown

Matrix: South Atlantic Dolphin Blubber  
In N. Atlantic: FALSE, In N. Pacific: FALSE  
Typically Monitored: FALSE  
Comment:

Instrument: GCxGC-TOF, EI, 70 eV  
1D RT, 2D RT (s): 1638.91, 1.3  
Quantitative Ion m/z: 238

Elemental Formula:  
Source: unknown  
Identification: NA

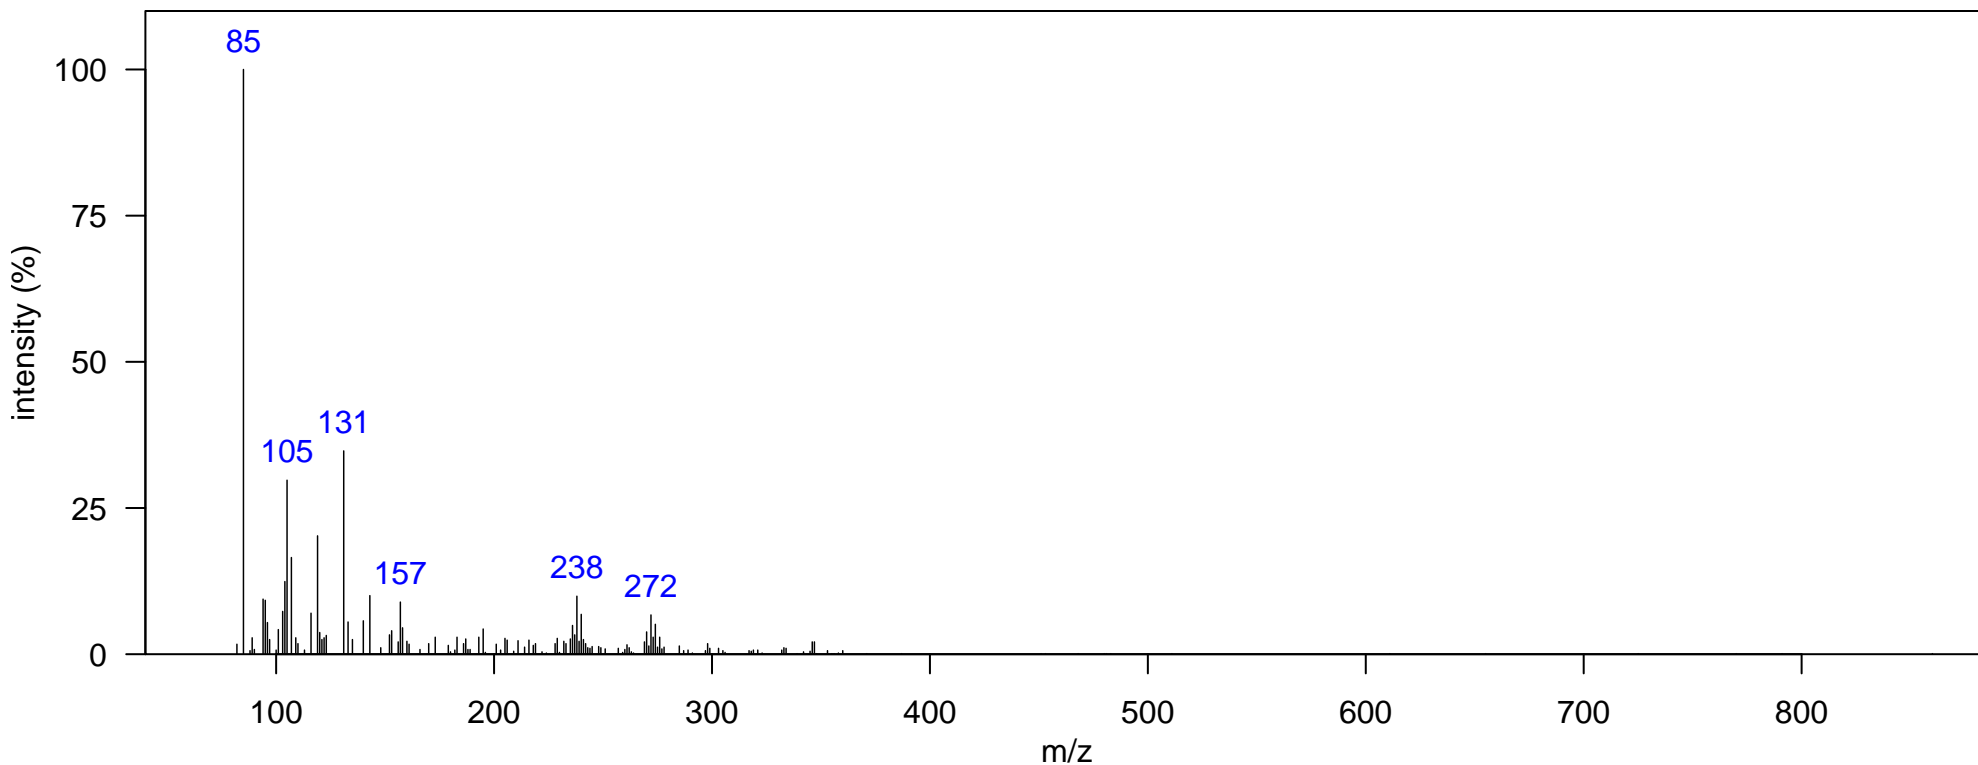

| m/z [Fragment] |
|----------------|
|----------------|

Name: unknown-28

Class: Unknown

Matrix: South Atlantic Dolphin Blubber  
In N. Atlantic: FALSE, In N. Pacific: FALSE  
Typically Monitored: FALSE  
Comment:

Instrument: GCxGC-TOF, EI, 70 eV  
1D RT, 2D RT (s): 1666.89, 1.419  
Quantitative Ion m/z: 272

Elemental Formula:  
Source: unknown  
Identification: NA

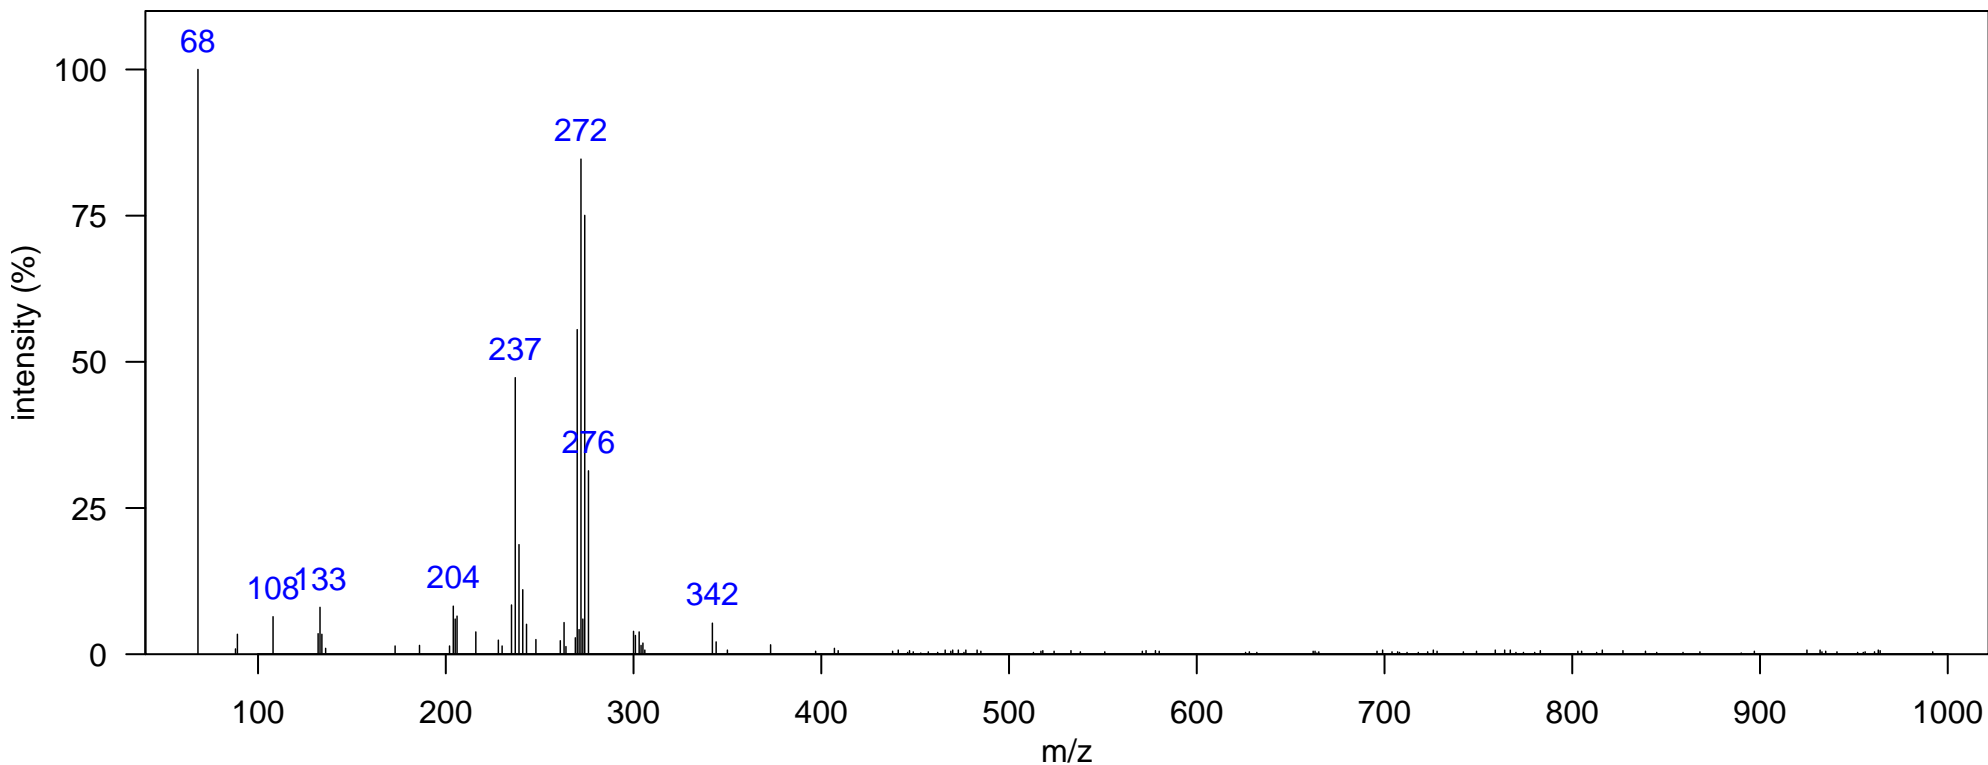

| m/z [Fragment] |
|----------------|
|----------------|

Name: unknown-29

Class: Unknown

Matrix: South Atlantic Dolphin Blubber

Instrument: GCxGC-TOF, EI, 70 eV

Elemental Formula: C<sub>11</sub>H<sub>5</sub>Cl<sub>7</sub>N<sub>4</sub>

In N. Atlantic: FALSE, In N. Pacific: TRUE

1D RT, 2D RT (s): 1708.87, 1.465

Source: unknown

Typically Monitored: FALSE

Quantitative Ion m/z: 440

Identification: NA

Comment: unknown-47 (Pacific Library). Might be 2-[p-chloroaniline]-4,6-bis(trichloromethyl)-triazine based on some spectral similarity

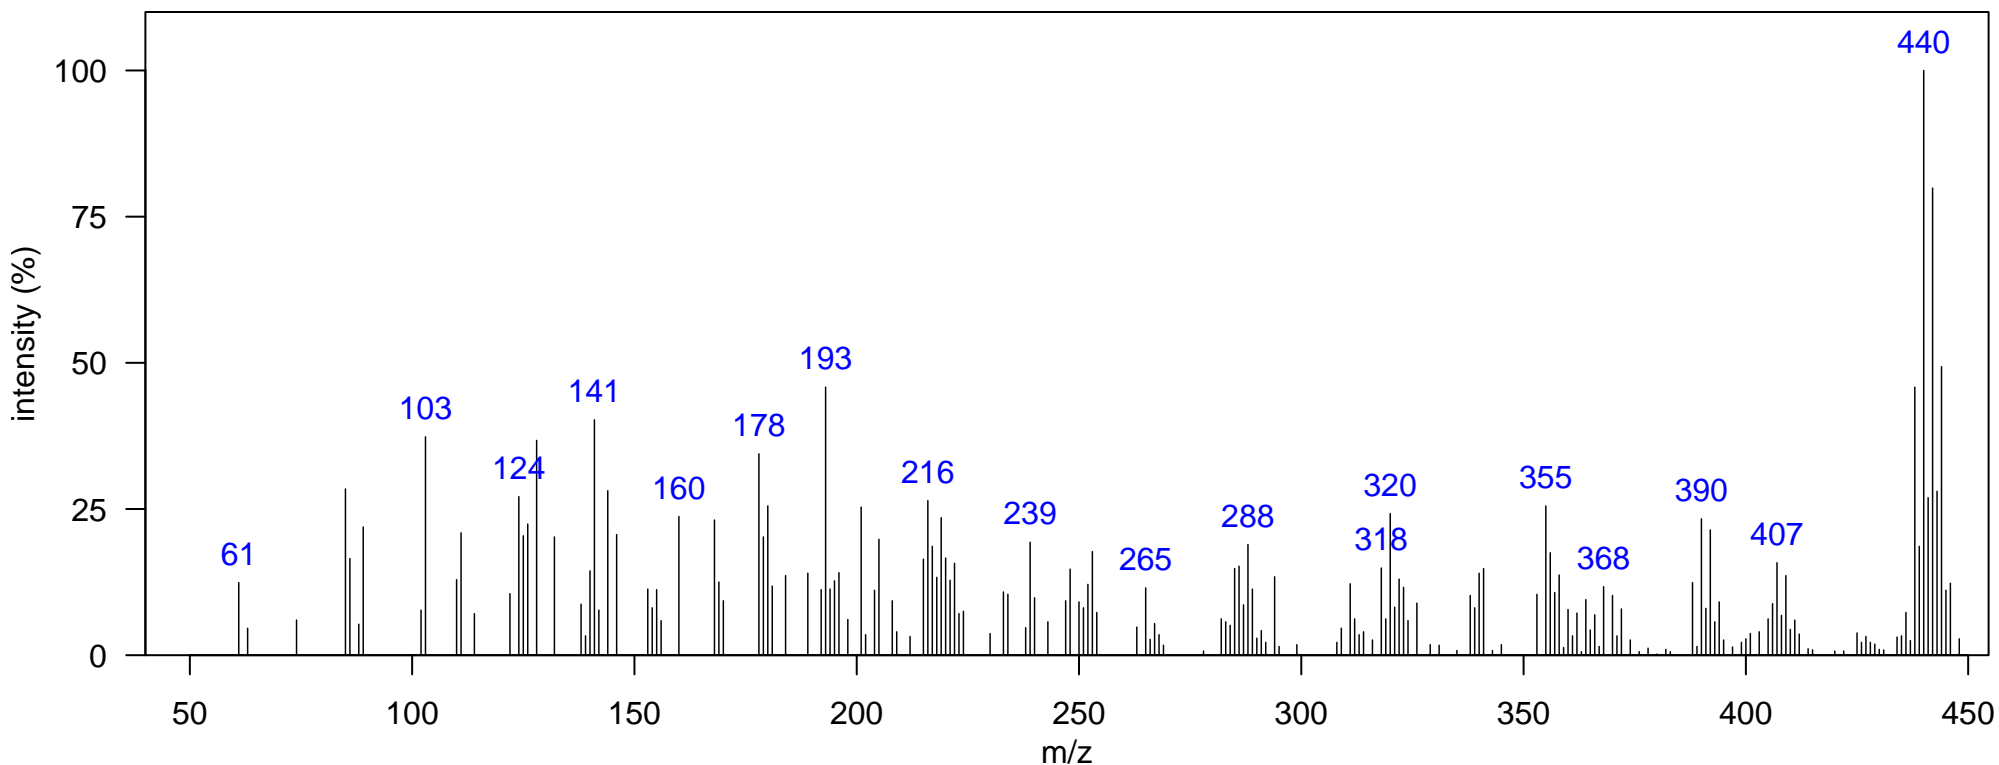

| m/z [Fragment] |
|----------------|
| 438 M+         |

Name: unknown-30

Class: Unknown

Matrix: South Atlantic Dolphin Blubber  
In N. Atlantic: FALSE, In N. Pacific: FALSE  
Typically Monitored: FALSE  
Comment:

Instrument: GCxGC-TOF, EI, 70 eV  
1D RT, 2D RT (s): 1778.83, 1.558  
Quantitative Ion m/z: 444

Elemental Formula:  
Source: unknown  
Identification: NA

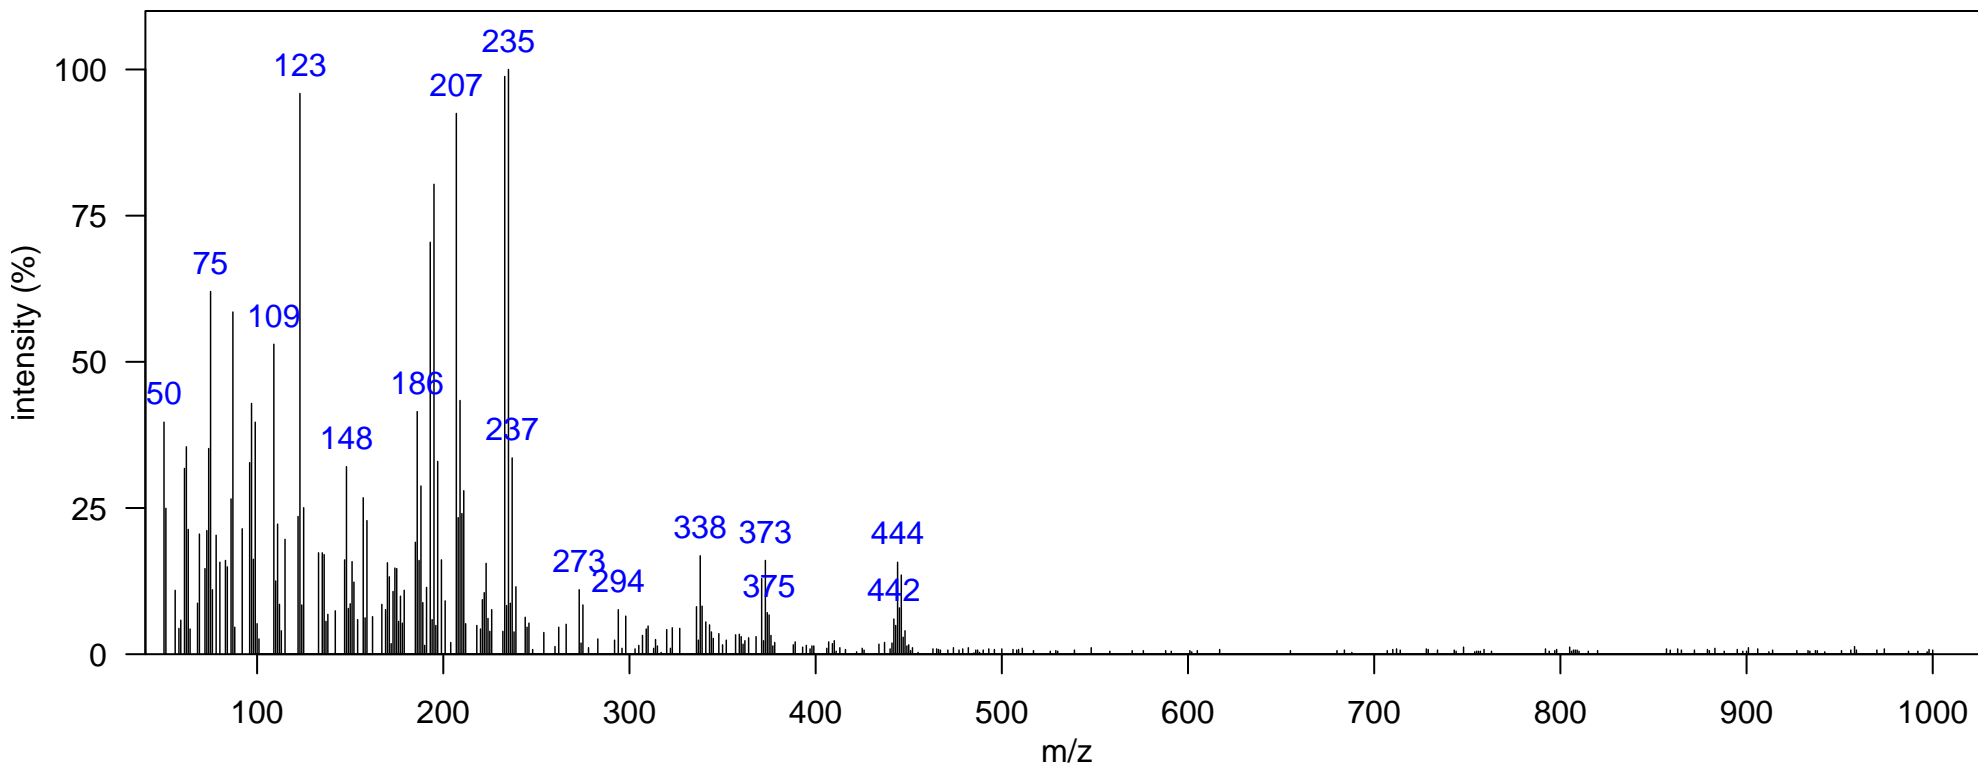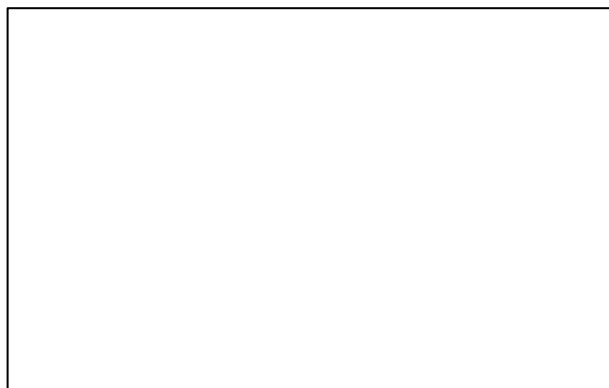

| m/z [Fragment] |
|----------------|
|----------------|



Name: unknown-31

Class: Unknown

Matrix: South Atlantic Dolphin Blubber  
In N. Atlantic: FALSE, In N. Pacific: FALSE  
Typically Monitored: FALSE  
Comment:

Instrument: GCxGC-TOF, EI, 70 eV  
1D RT, 2D RT (s): 1876.77, 1.881  
Quantitative Ion m/z: 530

Elemental Formula:  
Source: unknown  
Identification: NA

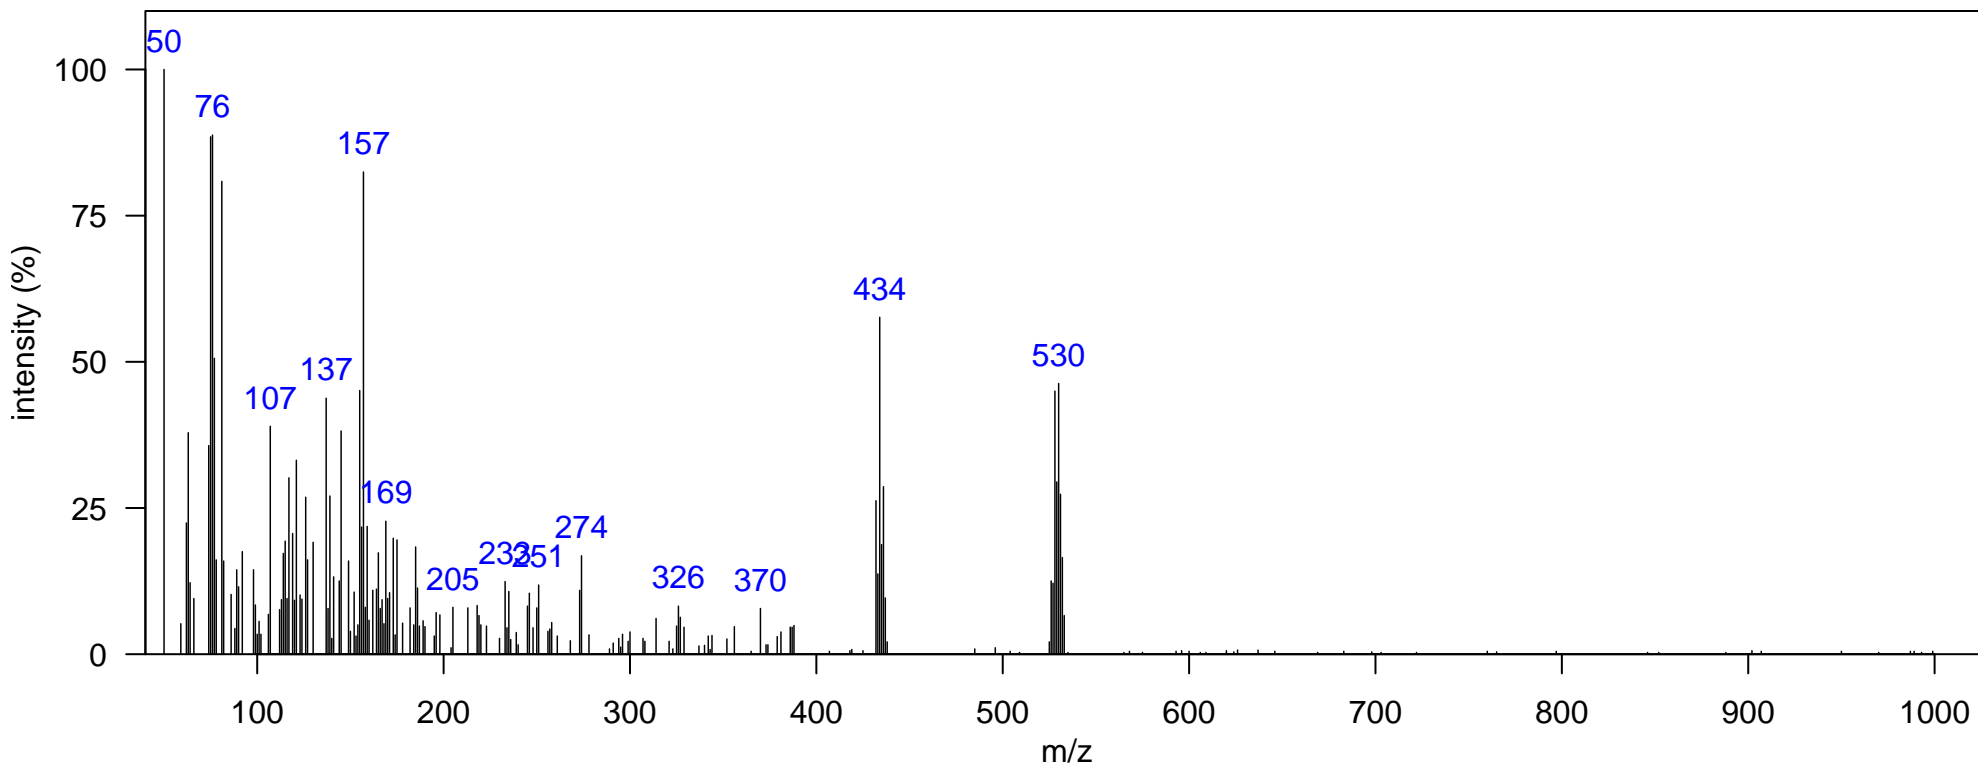

| m/z [Fragment] |
|----------------|
|----------------|

Name: unknown-32

Class: Unknown

Matrix: South Atlantic Dolphin Blubber  
In N. Atlantic: FALSE, In N. Pacific: FALSE  
Typically Monitored: FALSE  
Comment:

Instrument: GCxGC-TOF, EI, 70 eV  
1D RT, 2D RT (s): 1873.27, 1.709  
Quantitative Ion m/z: 512

Elemental Formula:  
Source: unknown  
Identification: NA

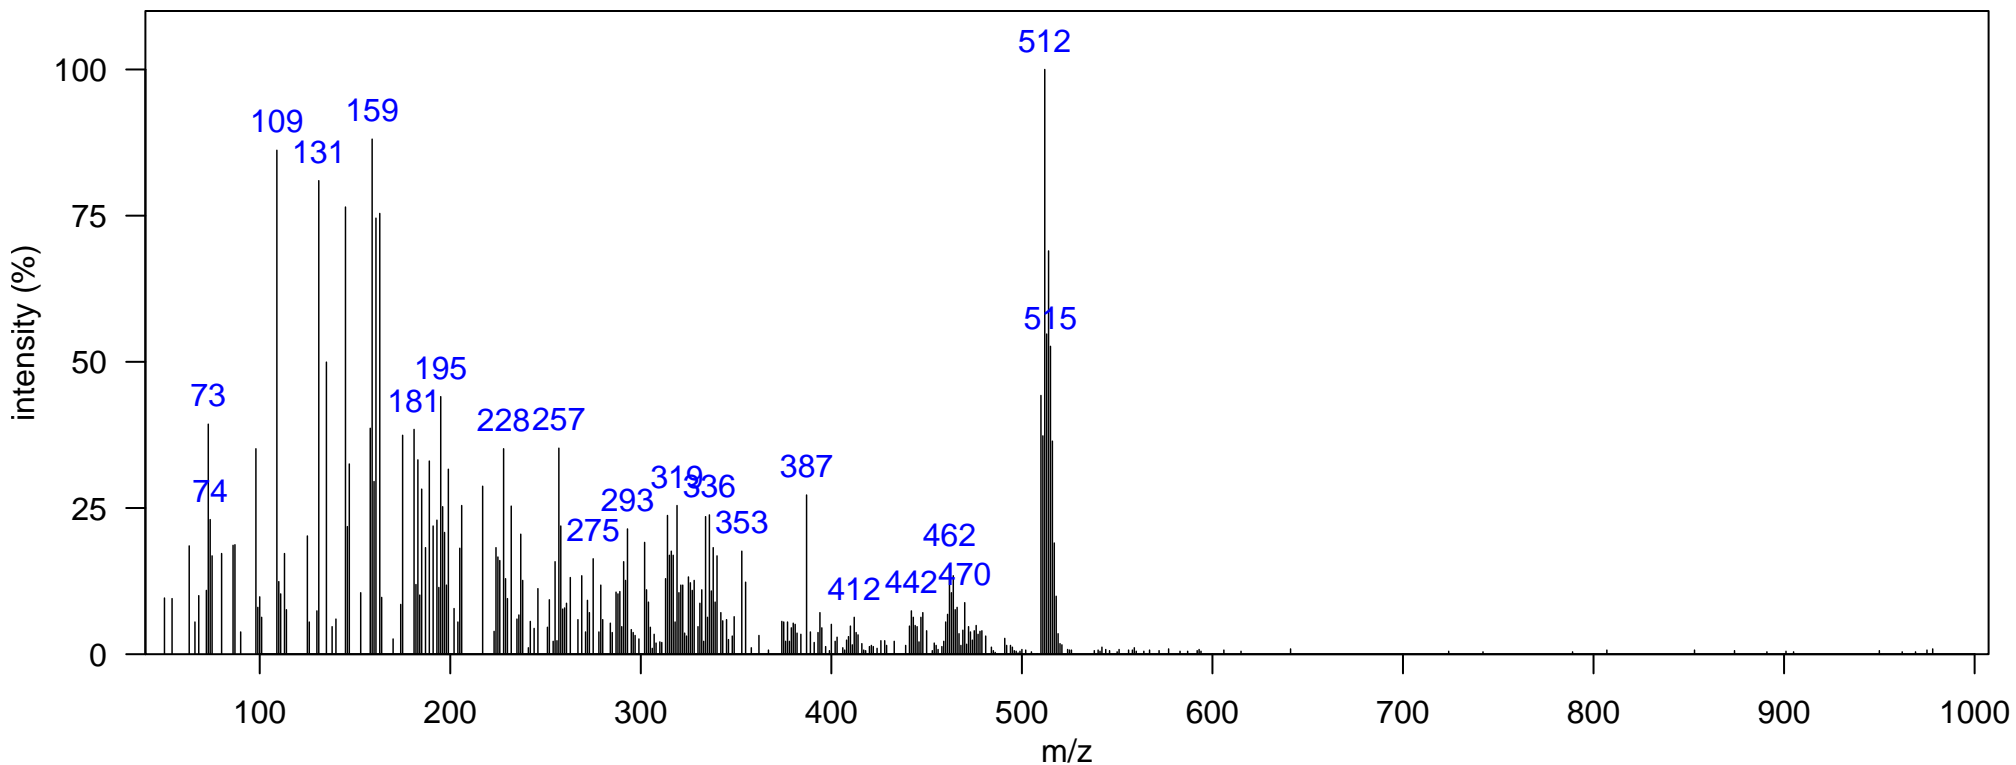

| m/z [Fragment] |
|----------------|
|----------------|

Name: unknown-33

Class: Unknown

Matrix: South Atlantic Dolphin Blubber  
In N. Atlantic: FALSE, In N. Pacific: FALSE  
Typically Monitored: FALSE  
Comment:

Instrument: GCxGC-TOF, EI, 70 eV  
1D RT, 2D RT (s): 1880.27, 1.802  
Quantitative Ion m/z: 500

Elemental Formula:  
Source: unknown  
Identification: NA

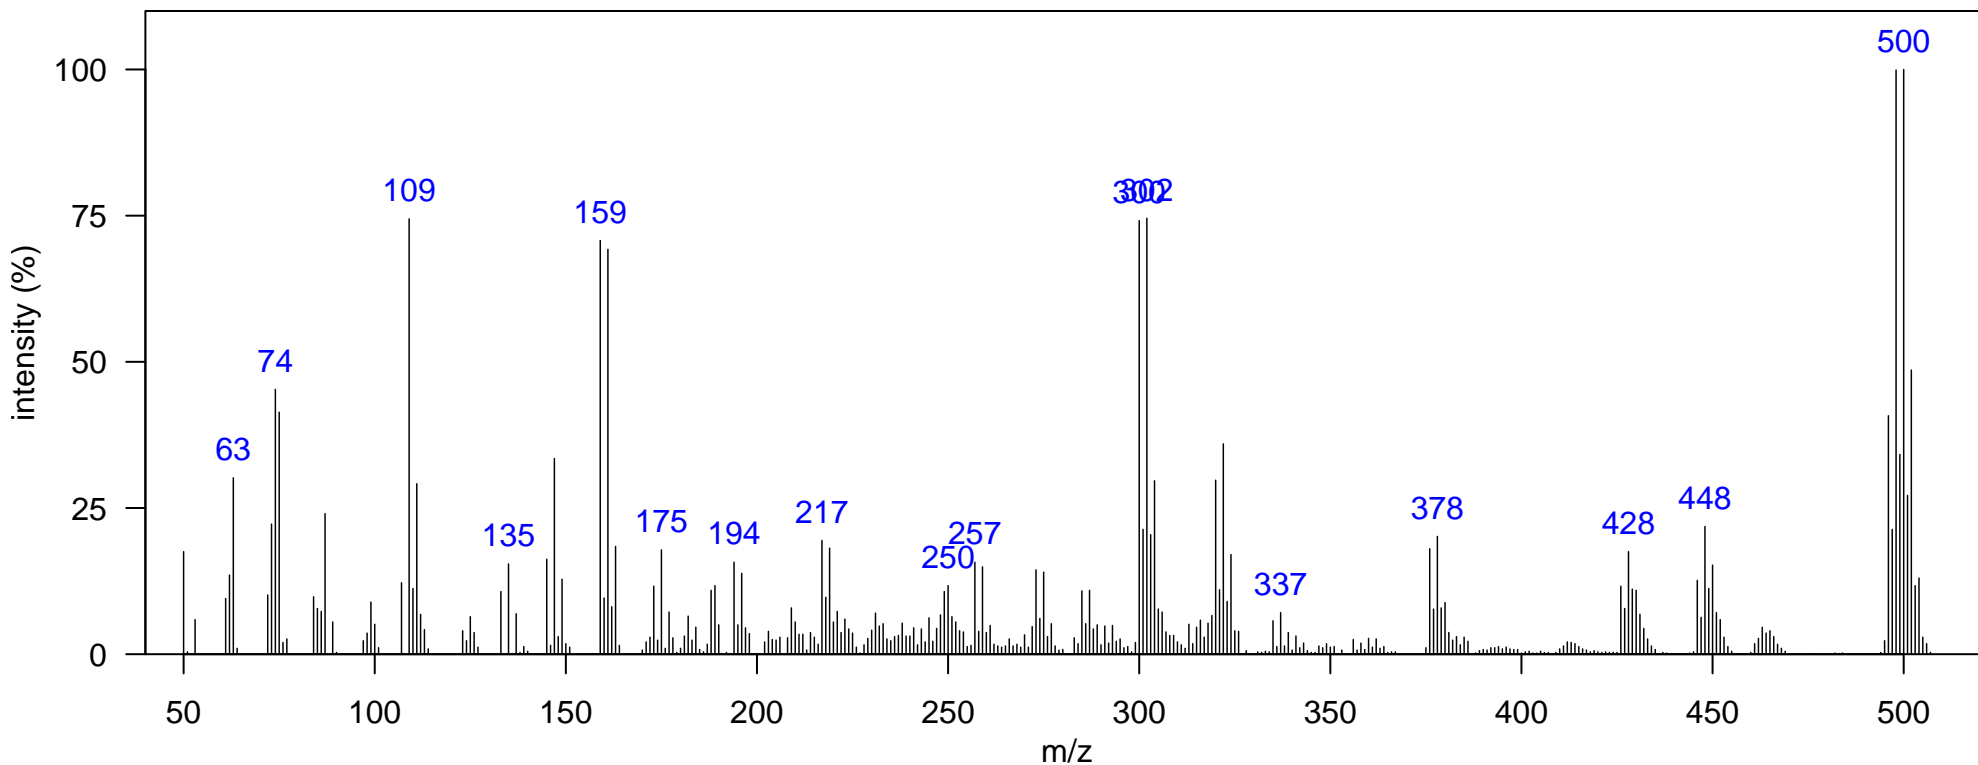

| m/z [Fragment] |
|----------------|
|----------------|

Name: unknown-34

Class: Unknown

Matrix: South Atlantic Dolphin Blubber  
In N. Atlantic: FALSE, In N. Pacific: FALSE  
Typically Monitored: FALSE  
Comment:

Instrument: GCxGC-TOF, EI, 70 eV  
1D RT, 2D RT (s): 1901.26, 1.94  
Quantitative Ion m/z: 357

Elemental Formula:  
Source: unknown  
Identification: NA

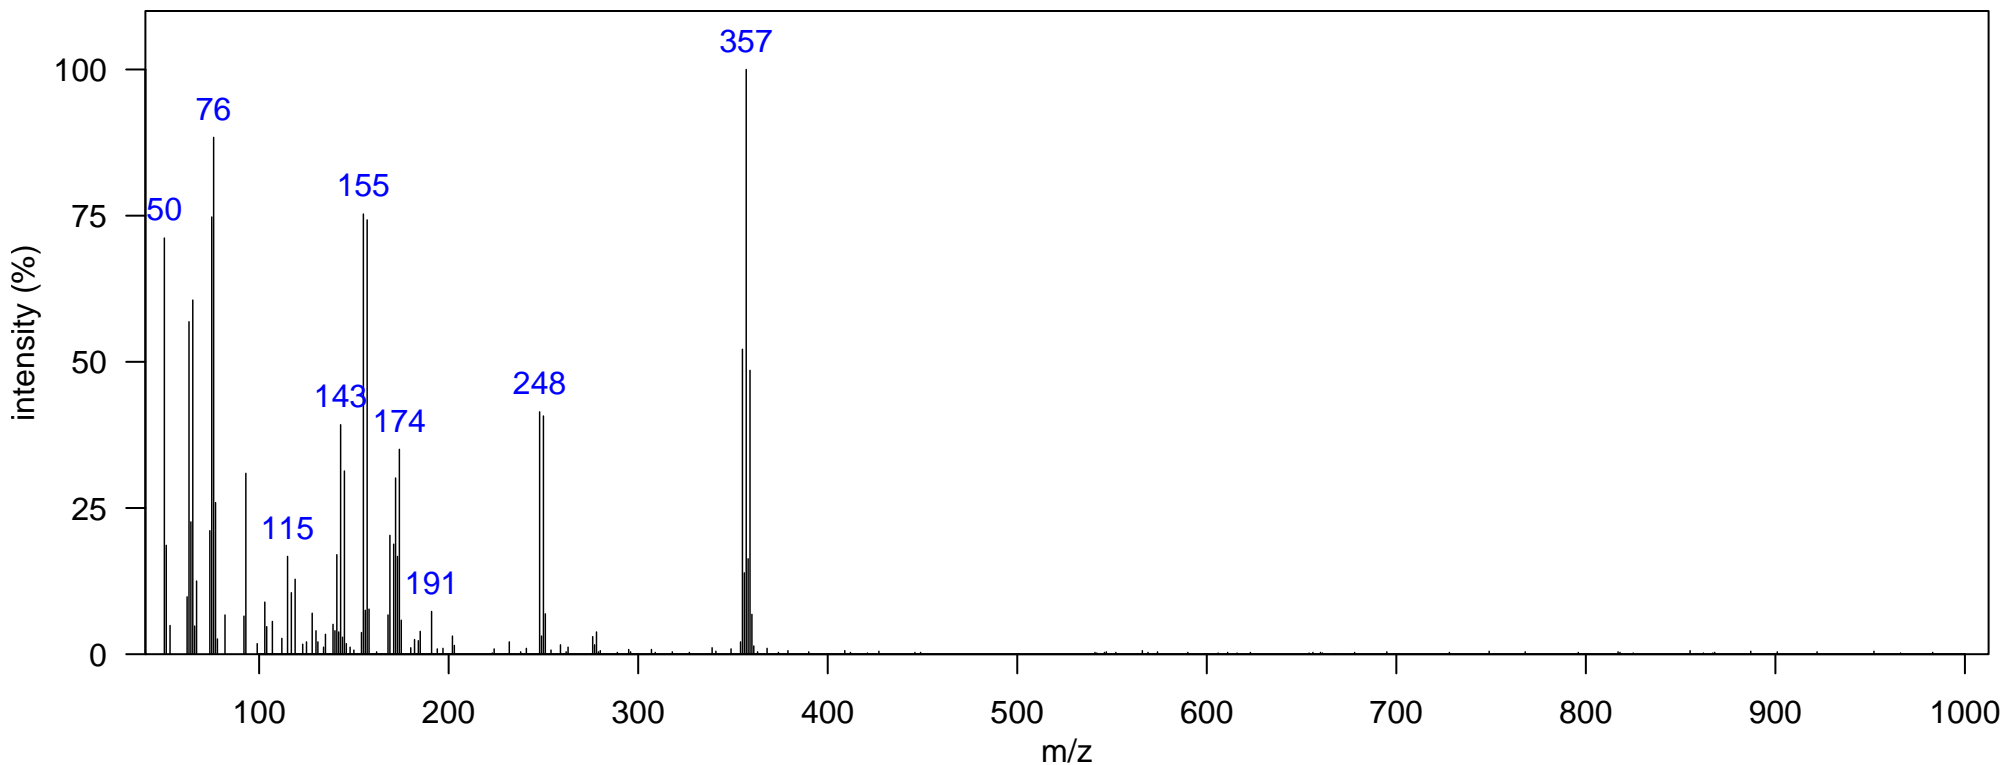

| m/z [Fragment] |
|----------------|
|----------------|

Name: unknown-35

Class: Unknown

Matrix: South Atlantic Dolphin Blubber  
In N. Atlantic: FALSE, In N. Pacific: FALSE  
Typically Monitored: FALSE  
Comment:

Instrument: GCxGC-TOF, EI, 70 eV  
1D RT, 2D RT (s): 1936.24, 1.828  
Quantitative Ion m/z: 263

Elemental Formula:  
Source: unknown  
Identification: NA

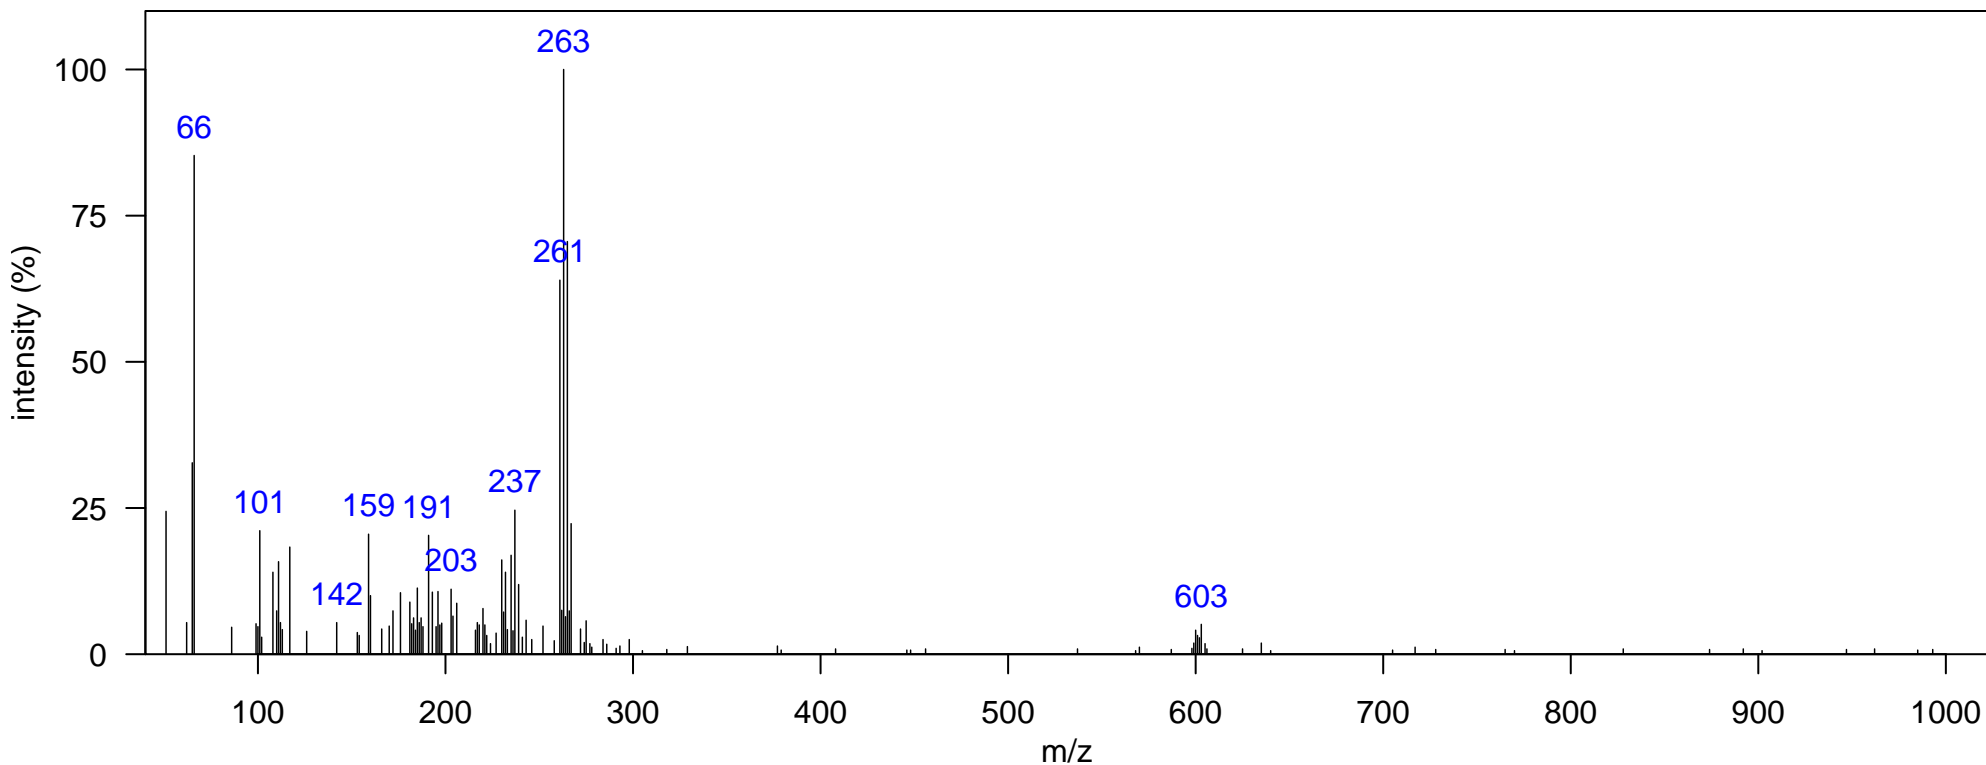

| m/z [Fragment] |
|----------------|
|----------------|

Name: unknown-36

Class: Unknown

Matrix: South Atlantic Dolphin Blubber

Instrument: GCxGC-TOF, EI, 70 eV

Elemental Formula:

In N. Atlantic: TRUE, In N. Pacific: FALSE

1D RT, 2D RT (s): 1974.71, 2.963

Source: unknown

Typically Monitored: FALSE

Quantitative Ion m/z: 610

Identification: NA

Comment: unknown-4-4 (N Atlantic Library); PM = Possible Molecular Ion

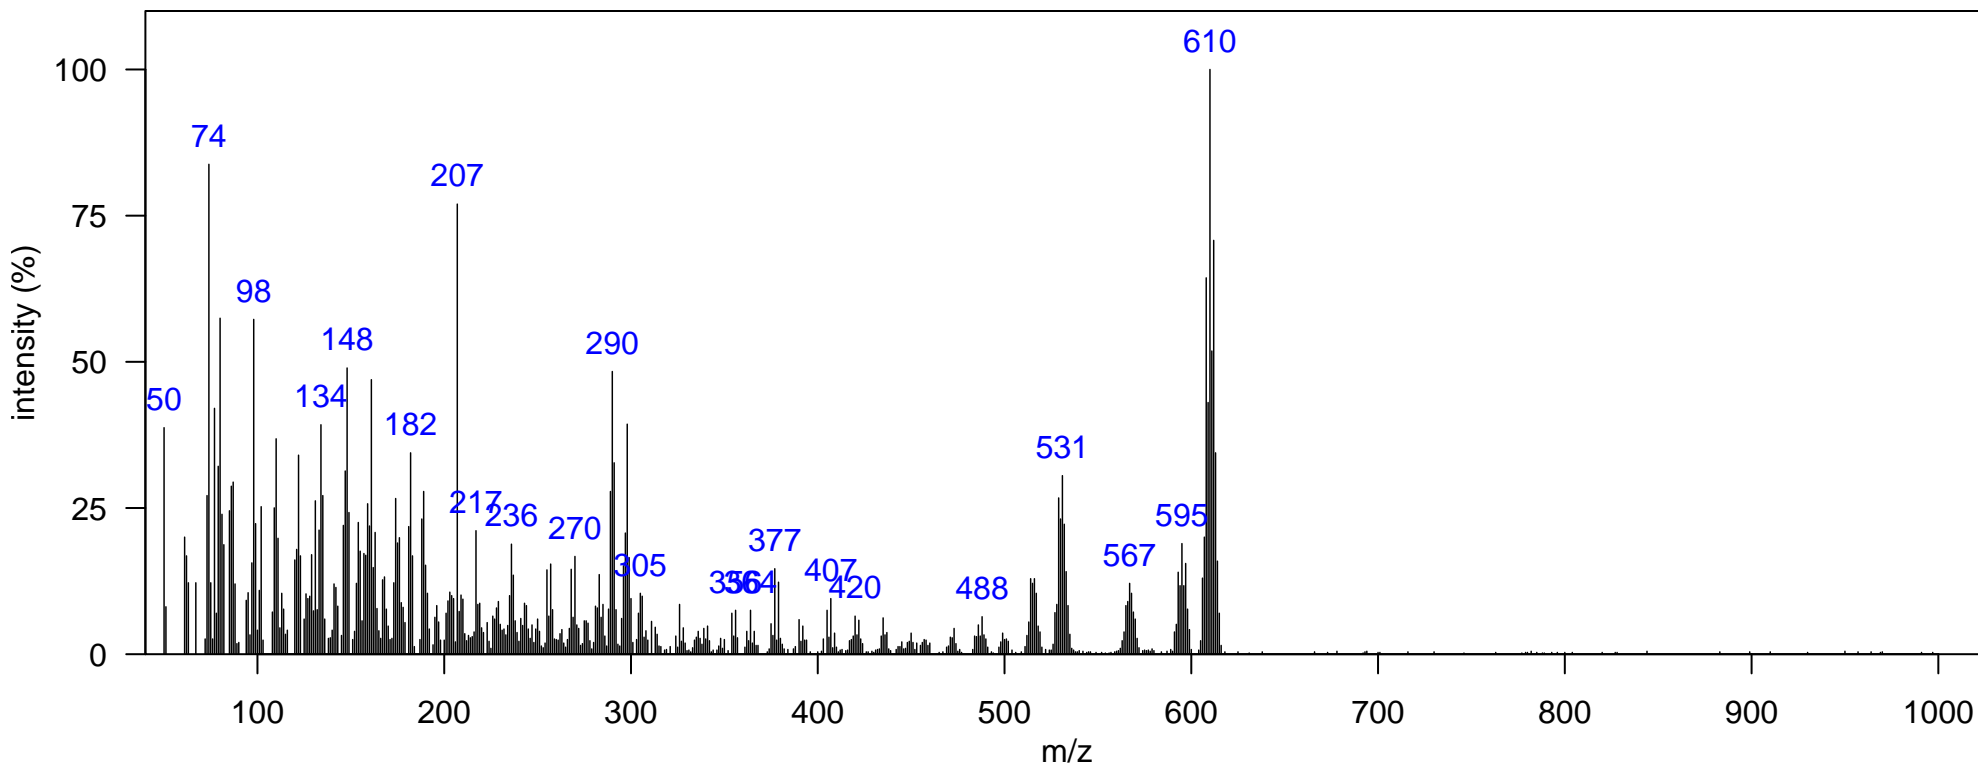

| m/z [Fragment]           |
|--------------------------|
| 512 [PM-Br-CH3]+         |
| 527 [PM-Br]+             |
| 563 [PM-C3H7]+           |
| 591 [PM-CH3]+            |
| 606 [PM]+ containing 4Br |

Name: unknown-37

Class: Unknown

Matrix: South Atlantic Dolphin Blubber  
In N. Atlantic: FALSE, In N. Pacific: FALSE  
Typically Monitored: FALSE  
Comment: Maybe mirex related

Instrument: GCxGC-TOF, EI, 70 eV  
1D RT, 2D RT (s): 1988.71, 2.066  
Quantitative Ion m/z: 567

Elemental Formula:  
Source: unknown  
Identification: NA

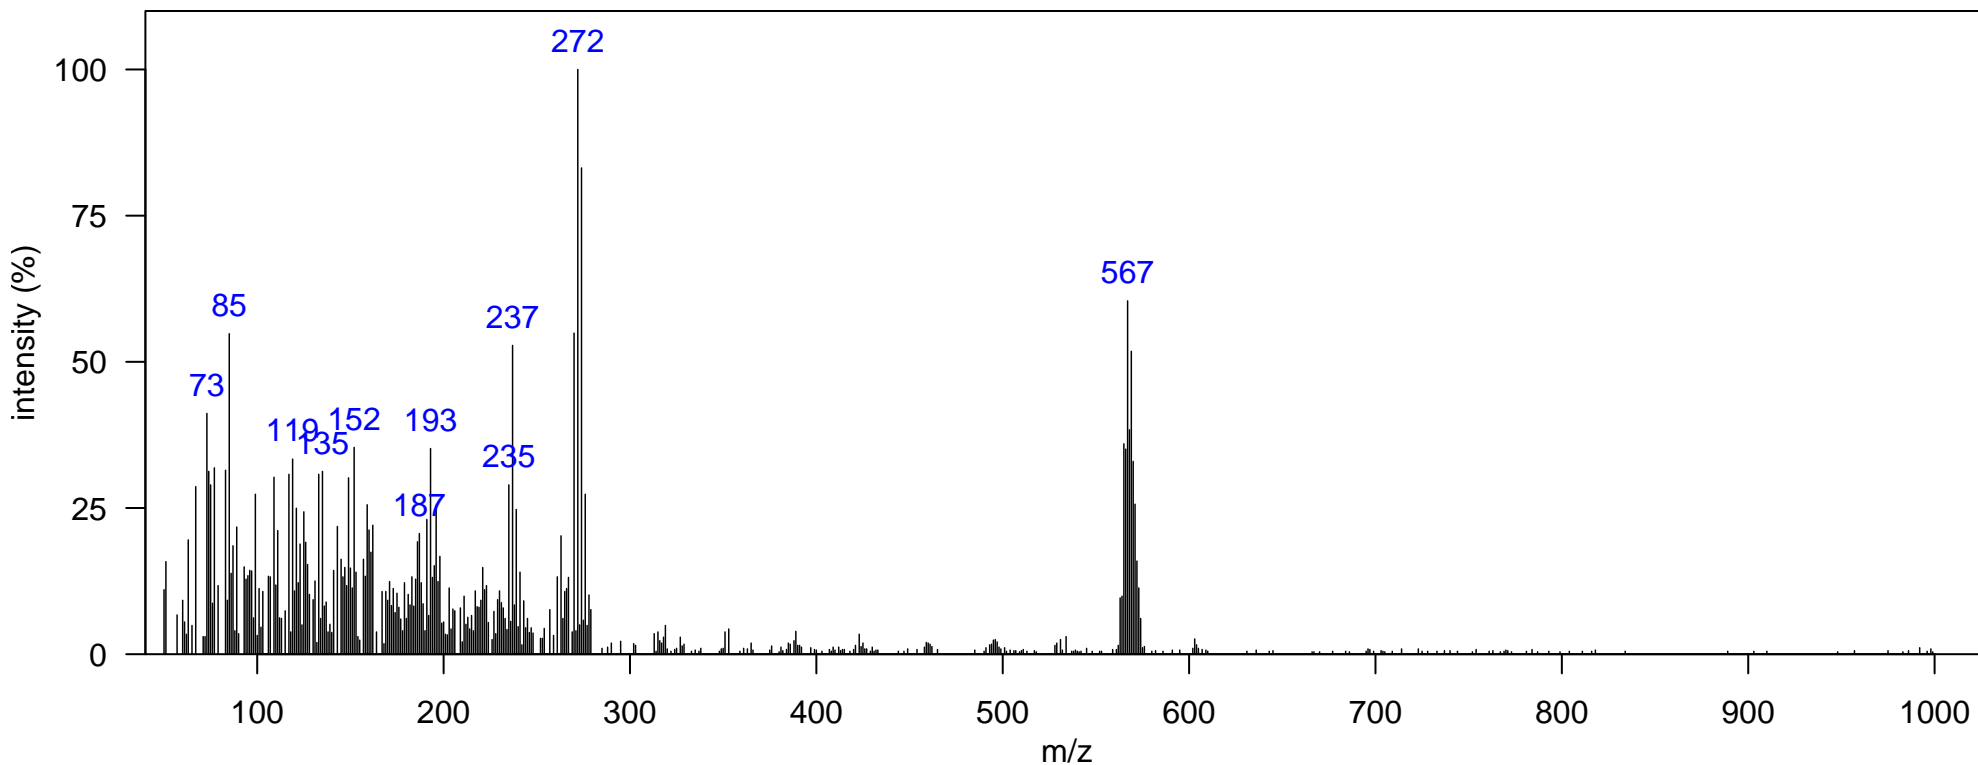

| m/z [Fragment] |
|----------------|
|----------------|
